# Supplementary material for: Palladium catalyzed/silver tuned selective mono-/tetra-acetoxylation of o-carboranes via B–H activation
Source: Royal Society of Chemistry journal article supplement (doi:10.1039/c6cc06200h), 2016-01-01

## Supporting Information

### Palladium catalyzed/silver tuned selective mono-/tetra-acetoxylation of *o*-carboranes via B-H activation

Ke Cao\*, Tao-Tao Xu<sup>†</sup>, Ji Wu<sup>†</sup>, Linhai Jiang, Junxiao Yang

State Key Laboratory Cultivation Base for Nonmetal Composite and Functional  
Materials & School of Materials Science and Engineering, Southwest University of  
Science and Technology, Mianyang, P. R. China.

E-mail: caoke@swust.edu.cn

### Context

General information

Experimental

Spectroscopic data for products

Copies of <sup>1</sup>H NMR, <sup>13</sup>C{<sup>1</sup>H} NMR <sup>11</sup>B{<sup>1</sup>H} and <sup>11</sup>B NMR

## General information

1a-1i<sup>1</sup>, 1k-1o<sup>2</sup> and 4a-4b<sup>3</sup> were synthesized according to literature methods. Other materials were purchased from J&K Scientific and used as received unless otherwise specified. All reactions under standard conditions were monitored by thin-layer chromatography (TLC) on gel F254 plates. The silica gel (200-300 meshes) is used for column chromatography, and the distillation range of petroleum ether is 60-90°C. <sup>1</sup>H NMR, <sup>13</sup>C{<sup>1</sup>H} and <sup>11</sup>B{<sup>1</sup>H} NMR spectra were recorded on the Bruker 600MHz or 400MHz instruments. All <sup>1</sup>H NMR and <sup>13</sup>C{<sup>1</sup>H} NMR spectral data are reported in *ppm* relative to tetramethylsilane (TMS) as internal standard, and <sup>11</sup>B{<sup>1</sup>H} NMR spectra data are referenced to external BF<sub>3</sub>•Et<sub>2</sub>O. HRMS data were measured with ESI techniques.

## Experimental

### General procedure for palladium catalyzed selective tetra-acetoxylation of *o*-carboranes:

To a 10 mL dried flask were sequentially added *o*-carborane (0.25 mmol), AcOH (1 mL), Ac<sub>2</sub>O (1ml), Pd(OAc)<sub>2</sub> (1.12 mg, 0.005 mmol) and PIDA (644 mg, 2 mmol) under argon atmosphere. After the reaction mixture was stirred at 100°C for 12-24h until the palladium black was formed, the reaction mixture was cooled to room temperature and extracted with ethyl acetate (60 ml). The organic phase was washed with water (3x10ml), NaHCO<sub>3</sub> (aq.) (3x10ml) and brine (3x10ml) in sequence, then dried over anhydrous Na<sub>2</sub>SO<sub>4</sub>. After evaporation of the solvent, the residue was purified by column chromatography on 200-300 mesh silica gel.

### Typical procedure for synthesis of 2a:

To a 10 ml dried flask were sequentially added 1, 2-Me<sub>2</sub>-*o*-carborane (43 mg, 0.25 mmol), AcOH (1 ml), Ac<sub>2</sub>O (1 ml), Pd(OAc)<sub>2</sub> (1.12 mg, 0.005 mmol) and PIDA (644 mg, 2 mmol) under argon atmosphere. After the reaction mixture was stirred at 100°C for 12h, the reaction mixture was cooled to room temperature and extracted with ethyl acetate (60 ml). The organic phase was washed with water (3x10ml), NaHCO<sub>3</sub> (aq.) (3x10ml) and brine (3x10ml) in sequence, then dried over anhydrous Na<sub>2</sub>SO<sub>4</sub>. After evaporation of the solvent, the residue was purified by column chromatography on 200-300 mesh silica gel with petroleum ether/EtOAc=2:1 afford **2a** (83mg, 82% yield).

The experiment procedure for synthesis **2b-2o** is almost the same. The detailed experiment parameters for synthesis of **2a-2o** are shown in Table S1.

**Table S1: Detailed reaction time and eluent for separate 2a-2o**

| Product   | Reaction time | Eluent for column chromatography           |
|-----------|---------------|--------------------------------------------|
| <b>2a</b> | 12h           | petroleum ether/EtOAc=2:1                  |
| <b>2b</b> | 24h           | petroleum ether/EtOAc=2:1                  |
| <b>2c</b> | 12h           | petroleum ether/EtOAc=2:1                  |
| <b>2d</b> | 12h           | petroleum ether/EtOAc=2:1                  |
| <b>2e</b> | 12h           | petroleum ether/EtOAc=2:1                  |
| <b>2f</b> | 21h           | petroleum ether/EtOAc=2:1                  |
| <b>2g</b> | 16h           | petroleum ether/EtOAc=2:1                  |
| <b>2h</b> | 16h           | petroleum ether/EtOAc=2:1                  |
| <b>2i</b> | 12h           | petroleum ether/EtOAc=2:1                  |
| <b>2j</b> | 12h           | CH <sub>2</sub> Cl <sub>2</sub> /EtOAc=6:1 |
| <b>2k</b> | 12h           | CH <sub>2</sub> Cl <sub>2</sub> /EtOAc=6:1 |
| <b>2l</b> | 12h           | CH <sub>2</sub> Cl <sub>2</sub> /EtOAc=6:1 |
| <b>2m</b> | 12h           | CH <sub>2</sub> Cl <sub>2</sub> /EtOAc=6:1 |
| <b>2n</b> | 14h           | CH <sub>2</sub> Cl <sub>2</sub> /EtOAc=6:1 |
| <b>2o</b> | 12h           | CH <sub>2</sub> Cl <sub>2</sub> /EtOAc=6:1 |

**General procedure for palladium catalyzed selective mono-acetoxylation of *o*-carboranes:**

To a 10 mL dried flask were sequentially added *o*-carborane (0.25 mmol), DCM (1 ml), AcOH (0.05ml), Pd(OAc)<sub>2</sub> (5.6 mg, 0.025 mmol), AgOAc (0.25 mmol, 41.5mg) and PIDA (161 mg, 0.5 mmol) under argon atmosphere. After the reaction mixture was stirred at 40°C for 24-36h until the palladium black was formed, the reaction mixture was cooled to room temperature and extracted with ethyl acetate (60 ml). The organic phase was washed with water (3x10ml), NaHCO<sub>3</sub> (aq.) (3x10ml) and brine (3x10ml) in sequence, then dried over anhydrous Na<sub>2</sub>SO<sub>4</sub>. After evaporation of the solvent, both isomers were separated by column chromatography on 200-300 mesh silica gel.

**Typical procedure for synthesis of 3aa and 3ab:**

To a 10 ml dried flask were sequentially added 1, 2-Me<sub>2</sub>-*o*-carborane (43 mg, 0.25

mmol), DCM (1 ml), AcOH (0.05 ml), Pd(OAc)<sub>2</sub> (5.6 mg, 0.025 mmol), AgOAc (0.25 mmol, 41.5mg) and PIDA (161 mg, 0.5 mmol) under argon atmosphere. After the reaction mixture was stirred at 40°C for 24h, the reaction mixture was cooled to room temperature and extracted with ethyl acetate (60 ml). The organic phase was washed with water (3x10ml), NaHCO<sub>3</sub> (aq.) (3x10ml) and brine (3x10ml) in sequence, then dried over anhydrous Na<sub>2</sub>SO<sub>4</sub>. After evaporation of the solvent, the residue was purified by column chromatography on 200-300 mesh silica gel with petroleum ether/EtOAc=30:1~20:1 afford 3aa and 3ab (34mg, 83% yield), and recovered 1, 2-Me<sub>2</sub>-*o*-carborane (13mg, 70% conversion).

The experiment procedure for synthesis **3b-3h** is almost the same. The detailed parameters for synthesis of **3b-3h** are shown in Table S2.

**Table S2: Detailed reaction time and eluent for separate both isomers of 3a-3h**

| Product   | Reaction time | Eluent for column chromatography |
|-----------|---------------|----------------------------------|
| <b>3a</b> | 24h           | petroleum ether/EtOAc=30:1~20:1  |
| <b>3b</b> | 24h           | petroleum ether/EtOAc=30:1~20:1  |
| <b>3c</b> | 24h           | petroleum ether/EtOAc=50:1~40:1  |
| <b>3d</b> | 24h           | petroleum ether/EtOAc=30:1~20:1  |
| <b>3e</b> | 26h           | petroleum ether/EtOAc=30:1       |
| <b>3f</b> | 24h           | petroleum ether/EtOAc=40:1       |
| <b>3g</b> | 24h           | petroleum ether/EtOAc=40:1       |
| <b>3h</b> | 36h           | petroleum ether/EtOAc=40:1~30:1  |

#### **Experiment procedure for synthesis of 4aa:**

To a 10 mL dried flask were sequentially added 9-Me-1, 2-Me<sub>2</sub>-*o*-carborane (46.5mg, 0.25 mmol), AcOH (1ml), Ac<sub>2</sub>O (1ml), Pd(OAc)<sub>2</sub> (1.12 mg, 0.005 mmol) and PIDA (483 mg, 1.5 mmol) under argon atmosphere. After the reaction mixture was stirred at 100°C for 10h, the reaction mixture was cooled to room temperature and extracted with ethyl acetate (60 ml). The organic phase was washed with water (3x10ml), NaHCO<sub>3</sub> (aq.) (3x10ml) and brine (3x10ml) in sequence, then dried over anhydrous Na<sub>2</sub>SO<sub>4</sub>. After evaporation of the solvent, the residue was purified by column chromatography on 200-300 mesh silica gel with CH<sub>2</sub>Cl<sub>2</sub>/EtOAc=20:1 as eluent, and gave 4aa (27mg, 30% yield).

#### **Experiment procedure for synthesis of 4bb:**

To a 10 mL dried flask were sequentially added 9, 12-Me<sub>2</sub>-1, 2-Me<sub>2</sub>-*o*-carborane



(50mg, 0.25 mmol), AcOH (1ml), Ac<sub>2</sub>O (1ml), Pd(OAc)<sub>2</sub> (1.12 mg, 0.005 mmol) and PIDA (322 mg, 1.0 mmol) under argon atmosphere. After the reaction mixture was stirred at 100°C for 10h, the reaction mixture was cooled to room temperature and extracted with ethyl acetate (60 ml). The organic phase was washed with water (3x10ml), NaHCO<sub>3</sub> (aq.) (3x10ml) and brine (3x10ml) in sequence, then dried over anhydrous Na<sub>2</sub>SO<sub>4</sub>. After evaporation of the solvent, the residue was purified by column chromatography on 200-300 mesh silica gel with petroleum ether/EtOAc=10:1 as eluent, and gave 4bb (22mg, 28% yield).

**Reference:**

1. (a) Heying, T. L.; Ager, J. W.; Jr., Clark, S. L.; Alexander, R. P.; Papetti, S.; Reid, J. A.; Trotz, S. I.; *Inorg. Chem.* **1963**, *2*, 1097. (b) Paxson, T. E.; Kaloustian, M. K.; Tom, G. M.; Wiersema, R. J.; Hawthorne, M. F. *J. Am. Chem. Soc.* **1972**, *94*, 4882. (c) Armstrong, A. F.; Valliant, J. F.; *Inorg. Chem.* **2007**, *46*, 2148.
2. Toppino, A.; Genady, A. R.; El-Zaria, M. E.; Reeve, J.; Mostofian, F.; Kent, J.; Valliant, J. F. *Inorg. Chem.* **2013**, *52*, 8743.
3. Zheng, Zhi.; Jiang, W.; Zinn, A. A.; Knobler, C. B.; Hawthorne, M. F. *Inorg. Chem.* **1995**, *34*, 2095.

## Spectroscopic data for products

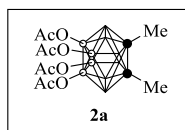

$^1\text{H}$  NMR (600MHz,  $\text{CDCl}_3$ , ppm):  $\delta$  2.11 (s, 6H), 2.09(s, 6H), 2.08 (s, 6H);  $^{13}\text{C}\{^1\text{H}\}$  NMR (150MHz,  $\text{CDCl}_3$ , ppm):  $\delta$  170.1, 169.6, 50.1, 22.3, 21.7;  $^{11}\text{B}\{^1\text{H}\}$  NMR (192 MHz,  $\text{CDCl}_3$ , ppm):  $\delta$  3.2 (2B, *BOAc*), -2.2 (2B, *BOAc*), -16.6 (4B), -19.2 (2B); HRMS: calculated for  $\text{C}_{12}\text{B}_{10}\text{H}_{24}\text{O}_8\text{Na}$  ( $\text{M}^+ + \text{Na}$ ) 427.2368; found: 427.2361.

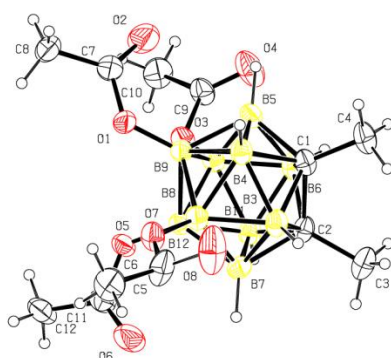

**Figure S1.** Molecular structure of 2a.

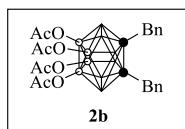

$^1\text{H}$  NMR (600MHz,  $\text{CDCl}_3$ , ppm):  $\delta$  7.37-7.34 (m, 6H), 7.24-7.22 (m, 4H), 3.69 (s, 4H), 2.02 (s, 6H), 2.00 (s, 6H);  $^{13}\text{C}\{^1\text{H}\}$  NMR (150MHz,  $\text{CDCl}_3$ , ppm):  $\delta$  170.1, 169.3, 134.3, 130.2, 128.9, 128.4, 60.2, 55.9, 39.4, 22.3, 22.2;  $^{11}\text{B}\{^1\text{H}\}$  NMR (192 MHz,  $\text{CDCl}_3$ , ppm):  $\delta$  3.7 (2B, *BOAc*), -1.8 (2B, *BOAc*), -17.7 (4B), -20.6 (2B); HRMS: calculated for  $\text{C}_{24}\text{B}_{10}\text{H}_{32}\text{O}_8\text{Na}$  ( $\text{M}^+ + \text{Na}$ ) 579.2977; found: 579.2986.

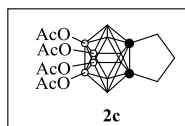

$^1\text{H}$  NMR (600MHz,  $\text{CDCl}_3$ , ppm):  $\delta$  2.60-2.56 (m, 4H), 2.55-2.54 (m, 2H), 2.09 (s, 12H);  $^{13}\text{C}\{^1\text{H}\}$  NMR (150MHz,  $\text{CDCl}_3$ , ppm):  $\delta$  170.1, 169.6, 61.7, 33.5, 32.9, 22.4;  $^{11}\text{B}\{^1\text{H}\}$  NMR (192 MHz,  $\text{CDCl}_3$ , ppm):  $\delta$  2.3 (2B, *BOAc*), -0.4 (2B, *BOAc*), -18.5

(4B), -20.1 (2B); HRMS: calculated for  $C_{13}B_{10}H_{24}O_8Na$  ( $M^+ + Na$ ) 439.2365; found: 439.2360.

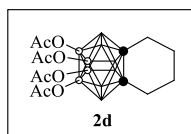

$^1H$  NMR (600MHz,  $CDCl_3$ , ppm):  $\delta$  2.51 (m, 4H), 2.08 (s, 12H), 1.62 (s, 4H);  $^{13}C\{^1H\}$  NMR (150MHz,  $CDCl_3$ , ppm):  $\delta$  170.0, 169.6, 49.5, 31.2, 22.3, 19.3;  $^{11}B\{^1H\}$  NMR (192 MHz,  $CDCl_3$ , ppm):  $\delta$  2.7 (2B, *BOAc*), -1.3 (2B, *BOAc*), -16.8 (4B), -22.8 (2B); HRMS: calculated for  $C_{14}B_{10}H_{26}O_8Na$  ( $M^+ + Na$ ) 453.2521; found: 453.2517.

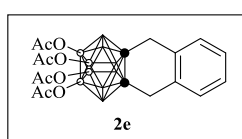

$^1H$  NMR (600MHz,  $CDCl_3$ , ppm):  $\delta$  7.24-7.23 (m, 2H), 7.08-7.06 (m, 2H), 3.78 (s, 4H), 2.12 (s, 6H), 2.08 (s, 6H);  $^{13}C\{^1H\}$  NMR (150MHz,  $CDCl_3$ , ppm):  $\delta$  169.9, 169.6, 128.8, 128.5, 127.8, 48.2, 36.1, 22.4, 22.3;  $^{11}B\{^1H\}$  NMR (192 MHz,  $CDCl_3$ , ppm):  $\delta$  3.2 (2B, *BOAc*), -1.7 (2B, *BOAc*), -16.9 (4B), -22.0 (2B); HRMS: calculated for  $C_{18}B_{10}H_{26}O_8Na$  ( $M^+ + Na$ ) 501.2509; found: 501.2523.

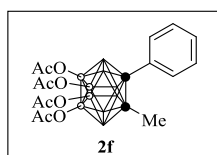

$^1H$  NMR (600MHz,  $CDCl_3$ , ppm):  $\delta$  7.73-7.72 (d,  $J=6$ Hz, 2H), 7.47-7.45 (dd,  $J=6$ Hz, 1H), 7.40-7.37 (dd,  $J=6$ Hz, 2H), 2.12 (brs, 9H), 2.08 (s, 3H), 1.75 (s, 3H);  $^{13}C\{^1H\}$  NMR (150MHz,  $CDCl_3$ , ppm):  $\delta$  170.1, 169.6, 169.5, 132.0, 131.0, 129.0, 128.6, 59.3, 53.6, 22.4, 21.4;  $^{11}B\{^1H\}$  NMR (192 MHz,  $CDCl_3$ , ppm):  $\delta$  4.5 (1B, *BOAc*), 3.9 (1B, *BOAc*), -1.8 (2B, *BOAc*), -16.3 (4B), -21.0 (2B); HRMS: calculated for  $C_{17}B_{10}H_{26}O_8Na$  ( $M^+ + Na$ ) 489.2505; found: 489.2523.

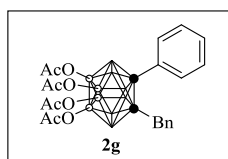

$^1H$  NMR (600MHz,  $CDCl_3$ , ppm):  $\delta$  7.81-7.80 (d,  $J=6$ Hz, 2H), 7.54-7.52 (dd,  $J=6$ Hz, 1H), 7.47-7.45 (dd,  $J=6$ Hz, 2H), 7.25-7.21 (m, 3H), 6.85-6.83 (m, 2H), 3.12 (s, 2H),

2.09 (s, 6H), 2.08 (s, 3H), 2.07 (s, 3H);  $^{13}\text{C}\{^1\text{H}\}$  NMR (150MHz,  $\text{CDCl}_3$ , ppm):  $\delta$  170.1, 169.4, 134.6, 132.5, 131.3, 129.9, 129.2, 128.6, 128.2, 60.8, 58.3, 39.1, 22.4, 22.3;  $^{11}\text{B}\{^1\text{H}\}$  NMR (192 MHz,  $\text{CDCl}_3$ , ppm):  $\delta$  4.5 (2B, *BOAc*), -1.59 (2B, *BOAc*), -17.2 (4B), -22.2 (2B); HRMS: calculated for  $\text{C}_{23}\text{B}_{10}\text{H}_{30}\text{O}_8\text{Na}$  ( $\text{M}^+\text{+Na}$ ) 565.2844; found: 565.2830.

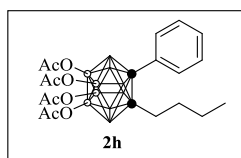

$^1\text{H}$  NMR (600MHz,  $\text{CDCl}_3$ , ppm):  $\delta$  7.71-7.70 (d,  $J=6\text{Hz}$ , 2H), 7.48-7.45 (dd,  $J=6\text{Hz}$ , 1H), 7.40-7.37 (dd,  $J=6\text{Hz}$ , 2H), 2.12 (s, 6H), 2.11 (s, 3H), 2.09 (s, 3H), 1.81-1.78 (m, 2H), 1.42-1.37 (m, 2H), 1.12-1.05 (m, 2H), 0.73-0.71 (t,  $J=6\text{Hz}$ , 3H);  $^{13}\text{C}\{^1\text{H}\}$  NMR (150MHz,  $\text{CDCl}_3$ , ppm):  $\delta$  170.2, 169.6, 169.5, 132.1, 131.0, 129.0, 128.6, 60.7, 58.6, 32.9, 31.8, 22.4, 22.0, 13.4;  $^{11}\text{B}\{^1\text{H}\}$  NMR (192 MHz,  $\text{CDCl}_3$ , ppm):  $\delta$  4.3 (2B, *BOAc*), -1.8 (2B, *BOAc*), -17.4 (4B), -21.8 (2B); HRMS: calculated for  $\text{C}_{20}\text{B}_{10}\text{H}_{32}\text{O}_8\text{Na}$  ( $\text{M}^+\text{+Na}$ ) 531.2994; found: 531.2986.

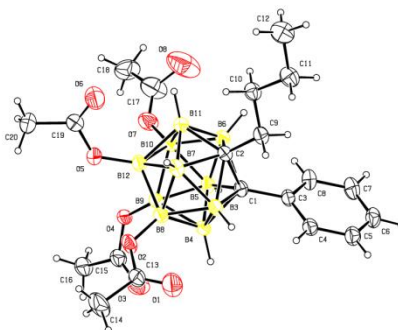

**Figure S2.** Molecular structure of 2h.

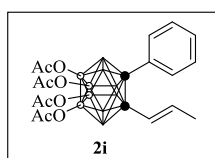

$^1\text{H}$  NMR (600MHz,  $\text{CDCl}_3$ , ppm):  $\delta$  7.66-7.65 (d,  $J=6\text{Hz}$ , 2H), 7.44-7.42 (dd,  $J=6\text{Hz}$ , 1H), 7.35-7.33 (dd,  $J=6\text{Hz}$ , 2H), 6.18-6.12 (m, 1H), 5.27-5.24 (m, 1H), 2.13 (s, 6H), 2.12 (s, 3H), 2.09 (s, 3H), 1.53-1.52 (d,  $J=6\text{Hz}$ , 3H);  $^{13}\text{C}\{^1\text{H}\}$  NMR (150MHz,  $\text{CDCl}_3$ , ppm):  $\delta$  170.1, 169.6, 169.5, 139.6, 131.9, 130.8, 128.7, 128.6, 120.8, 59.8, 57.7, 22.4,

22.3, 17.8;  $^{11}\text{B}\{^1\text{H}\}$  NMR (192 MHz,  $\text{CDCl}_3$ , ppm):  $\delta$  4.5 (2B, *BOAc*), -1.9 (2B, *BOAc*), -16.6 (4B), -21.5 (2B); HRMS: calculated for  $\text{C}_{19}\text{B}_{10}\text{H}_{28}\text{O}_8\text{Na}$  ( $\text{M}^+\text{+Na}$ ) 515.2667; found: 515.2680.

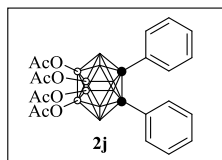

$^1\text{H}$  NMR (600MHz,  $\text{CDCl}_3$ , ppm):  $\delta$  7.51-7.49 (m, 4H), 7.25-7.22 (m, 2H), 7.14-7.12 (m, 4H), 2.16 (s, 6H), 2.12 (s, 6H);  $^{13}\text{C}\{^1\text{H}\}$  NMR (150MHz,  $\text{CDCl}_3$ , ppm):  $\delta$  170.2, 169.5, 131.5, 130.6, 128.4, 128.3, 61.9, 22.5, 22.4;  $^{11}\text{B}\{^1\text{H}\}$  NMR (192 MHz,  $\text{CDCl}_3$ , ppm):  $\delta$  5.2 (2B, *BOAc*), -1.9 (2B, *BOAc*), -15.9 (4B), -21.9 (2B); HRMS: calculated for  $\text{C}_{22}\text{B}_{10}\text{H}_{28}\text{O}_8\text{Na}$  ( $\text{M}^+\text{+Na}$ ) 551.2672; found: 551.2680.

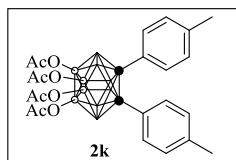

$^1\text{H}$  NMR (600MHz,  $\text{CDCl}_3$ , ppm):  $\delta$  7.39-7.38 (d,  $J=6\text{Hz}$ , 4H), 6.94-6.93 (d,  $J=6\text{Hz}$ , 4H), 2.22 (s, 6H), 2.16 (6H), 2.12 (s, 6H);  $^{13}\text{C}\{^1\text{H}\}$  NMR (150MHz,  $\text{CDCl}_3$ , ppm):  $\delta$  170.3, 169.5, 140.9, 131.4, 129.1, 125.6, 62.3, 22.5, 22.4, 20.9;  $^{11}\text{B}\{^1\text{H}\}$  NMR (192 MHz,  $\text{CDCl}_3$ , ppm):  $\delta$  5.1 (2B, *BOAc*), -2.0 (2B, *BOAc*), -15.9 (4B), -21.9 (2B); HRMS: calculated for  $\text{C}_{24}\text{B}_{10}\text{H}_{32}\text{O}_8\text{Na}$  ( $\text{M}^+\text{+Na}$ ) 579.2969; found: 579.2993.

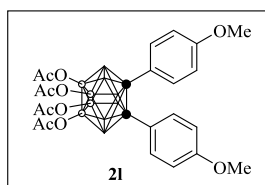

$^1\text{H}$  NMR (600MHz,  $\text{CDCl}_3$ , ppm):  $\delta$  7.42-7.41 (d,  $J=6\text{Hz}$ , 4H), 6.63-6.62 (d,  $J=6\text{Hz}$ , 4H), 3.71 (s, 6H), 2.15 (s, 6H), 2.12 (s, 6H);  $^{13}\text{C}\{^1\text{H}\}$  NMR (150MHz,  $\text{CDCl}_3$ , ppm): 170.3, 169.6, 161.1, 133.1, 120.5, 113.6, 62.9, 60.2, 55.3, 22.5, 22.4;  $^{11}\text{B}\{^1\text{H}\}$  NMR (192 MHz,  $\text{CDCl}_3$ , ppm):  $\delta$  4.9 (2B, *BOAc*), -2.2 (2B, *BOAc*), -15.9 (4B), -21.8 (2B); HRMS: calculated for  $\text{C}_{24}\text{B}_{10}\text{H}_{32}\text{O}_{10}\text{Na}$  ( $\text{M}^+\text{+Na}$ ) 611.2872; found: 611.2891.

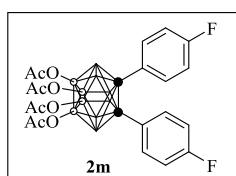

$^1\text{H}$  NMR (600MHz,  $\text{CDCl}_3$ , *ppm*):  $\delta$  7.52-7.50 (m, 4H), 6.87-6.84 (m, 4H), 2.17 (s, 6H), 2.13 (s, 6H);  $^{13}\text{C}\{^1\text{H}\}$  NMR (150MHz,  $\text{CDCl}_3$ , *ppm*):  $\delta$  170.2, 169.5, 164.7, 163.1, 133.7, 133.6, 124.3, 115.8, 115.7, 61.2, 22.5, 22.4;  $^{11}\text{B}\{^1\text{H}\}$  NMR (192 MHz,  $\text{CDCl}_3$ , *ppm*):  $\delta$  5.4 (2B, *BOAc*), -1.9 (2B, *BOAc*), -15.8 (4B), -21.9 (2B); HRMS: calculated for  $\text{C}_{22}\text{B}_{10}\text{H}_{27}\text{O}_8\text{F}_2$  ( $\text{M}^+\text{+H}$ ) 565.2656; found: 565.2672.

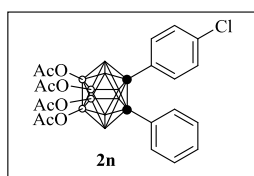

$^1\text{H}$  NMR (600MHz,  $\text{CDCl}_3$ , *ppm*):  $\delta$  7.52-7.51 (d,  $J=6\text{Hz}$ , 2H), 7.44-7.43 (d,  $J=6\text{Hz}$ , 2H), 7.28-7.26 (dd,  $J=6\text{Hz}$ , 1H), 7.19-7.16 (dd,  $J=6\text{Hz}$ , 2H), 7.12-7.11 (d,  $J=6\text{Hz}$ , 2H), 2.17 (s, 6H), 2.13 (s, 6H);  $^{13}\text{C}\{^1\text{H}\}$  NMR (150MHz,  $\text{CDCl}_3$ , *ppm*):  $\delta$  170.2, 169.5, 137.2, 132.7, 131.5, 130.9, 128.7, 128.6, 128.1, 127.1, 61.9, 60.9, 22.5, 22.4;  $^{11}\text{B}\{^1\text{H}\}$  NMR (192 MHz,  $\text{CDCl}_3$ , *ppm*):  $\delta$  5.3 (2B, *BOAc*), -1.8 (2B, *BOAc*), -15.9 (4B), -21.9 (2B); HRMS: calculated for  $\text{C}_{22}\text{B}_{10}\text{H}_{28}\text{O}_8\text{Cl}$  ( $\text{M}^+\text{+H}$ ) 563.2458; found: 563.2470.

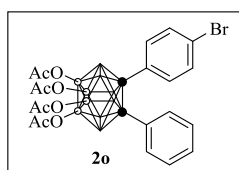

$^1\text{H}$  NMR (600MHz,  $\text{CDCl}_3$ , *ppm*):  $\delta$  7.52-7.51 (d,  $J=6\text{Hz}$ , 2H), 7.37-7.36 (d,  $J=6\text{Hz}$ , 2H), 7.29-7.27 (dd,  $J=6\text{Hz}$ , 3H), 7.19-7.17 (dd,  $J=6\text{Hz}$ , 2H), 2.17 (s, 6H), 2.13 (s, 6H);  $^{13}\text{C}\{^1\text{H}\}$  NMR (150MHz,  $\text{CDCl}_3$ , *ppm*):  $\delta$  170.2, 169.5, 132.9, 131.7, 131.5, 130.9, 128.6, 128.1, 127.6, 125.6, 61.9, 60.9, 22.5, 22.4;  $^{11}\text{B}\{^1\text{H}\}$  NMR (192 MHz,  $\text{CDCl}_3$ , *ppm*):  $\delta$  5.4 (2B, *BOAc*), -1.8 (2B, *BOAc*), -15.9 (4B), -22.0 (2B); HRMS: calculated for  $\text{C}_{22}\text{B}_{10}\text{H}_{27}\text{O}_8\text{BrNa}$  ( $\text{M}^+\text{+Na}$ ) 629.1755; found: 629.1785.

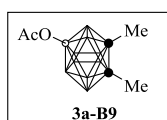

$^1\text{H}$  NMR (600MHz,  $\text{CDCl}_3$ , *ppm*):  $\delta$  2.06 (s, 3H), 2.04 (s, 3H), 2.01 (s, 3H);  $^{13}\text{C}\{^1\text{H}\}$  NMR (150MHz,  $\text{CDCl}_3$ , *ppm*):  $\delta$  170.1, 69.0, 61.9, 23.7, 22.6, 21.2;  $^{11}\text{B}\{^1\text{H}\}$  NMR (192 MHz,  $\text{CDCl}_3$ , *ppm*):  $\delta$  9.5 (1B, *BOAc*), -5.8 (1B), -10.3 (4B), -10.9 (2B), -11.8 (2B); HRMS: calculated for  $\text{C}_6\text{B}_{10}\text{H}_{19}\text{O}_2$  ( $\text{M}^+\text{+H}$ ) 231.23827; found: 231.23854.

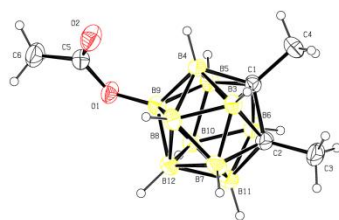

**Figure S3.** Molecular structure of 3a (3a-B9).

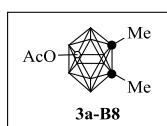

$^1\text{H}$  NMR (600MHz,  $\text{CDCl}_3$ , ppm):  $\delta$  2.08 (s, 3H), 2.04 (6H);  $^{13}\text{C}\{^1\text{H}\}$  NMR (150MHz,  $\text{CDCl}_3$ , ppm):  $\delta$  170.5, 68.5, 22.9, 22.5;  $^{11}\text{B}\{^1\text{H}\}$  NMR (192 MHz,  $\text{CDCl}_3$ , ppm):  $\delta$  4.7 (1B, *BOAc*), -5.6 (2B), -9.2 (1B), -10.4 (2B), -11.8 (2B), -13.3 (1B), -14.3 (1B); HRMS: calculated for  $\text{C}_6\text{B}_{10}\text{H}_{19}\text{O}_2(\text{M}^++\text{H})$  231.23827; found: 231.23827.

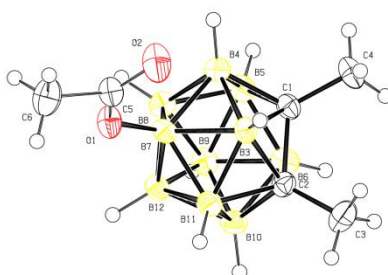

**Figure S4.** Molecular structure of 3ab (3a-B8).

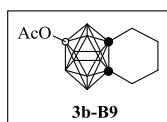

$^1\text{H}$  NMR (600MHz,  $\text{CDCl}_3$ , ppm):  $\delta$  2.44-2.43 (m, 4H), 2.09 (s, 3H), 1.59-1.58 (m, 4H);  $^{13}\text{C}\{^1\text{H}\}$  NMR (150MHz,  $\text{CDCl}_3$ , ppm):  $\delta$  170.1, 68.6, 61.6, 32.9, 30.9, 22.6, 19.9, 19.3;  $^{11}\text{B}\{^1\text{H}\}$  NMR (192 MHz,  $\text{CDCl}_3$ , ppm):  $\delta$  8.8 (1B, *BOAc*), -6.3 (1B), -9.9 (2B), -10.5 (2B), -11.9 (2B), -13.7 (2B); HRMS: calculated for  $\text{C}_8\text{B}_{10}\text{H}_{21}\text{O}_2(\text{M}^++\text{H})$  257.25392; found: 257.25394.

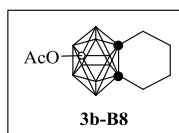

$^1\text{H}$  NMR (600MHz,  $\text{CDCl}_3$ , *ppm*):  $\delta$  2.44-2.43 (m, 4H), 2.09 (s, 3H), 1.59-1.58 (m, 4H);  $^{13}\text{C}\{^1\text{H}\}$  NMR (150MHz,  $\text{CDCl}_3$ , *ppm*):  $\delta$  170.5, 68.2, 32.6, 22.6, 19.6;  $^{11}\text{B}\{^1\text{H}\}$  NMR (192 MHz,  $\text{CDCl}_3$ , *ppm*):  $\delta$  5.8 (1B, *BOAc*), -6.2 (2B), -10.6 (2B), -12.0 (4B), -17.7 (1B); HRMS: calculated for  $\text{C}_8\text{B}_{10}\text{H}_{21}\text{O}_2$  ( $\text{M}^+\text{+H}$ ) 257.25392; found: 257.25385.

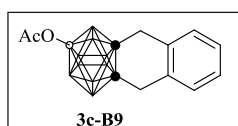

$^1\text{H}$  NMR (600MHz,  $\text{CDCl}_3$ , *ppm*):  $\delta$  7.25-7.23 (m, 2H), 7.07 (brs, 2H), 3.77 (s, 2H), 3.72 (s, 2H), 2.04 (s, 3H);  $^{13}\text{C}\{^1\text{H}\}$  NMR (150MHz,  $\text{CDCl}_3$ , *ppm*):  $\delta$  170.1, 129.2, 128.8, 128.7, 127.7, 127.6, 66.8, 60.3, 37.8, 35.7, 22.6;  $^{11}\text{B}\{^1\text{H}\}$  NMR (192 MHz,  $\text{CDCl}_3$ , *ppm*):  $\delta$  9.3 (1B, *BOAc*), -5.7 (2B), -10.3 (4B), -11.9 (2B), -12.6 (1B); HRMS: calculated for  $\text{C}_{12}\text{B}_{10}\text{H}_{21}\text{O}_2$  ( $\text{M}^+\text{+H}$ ) 305.25392; found: 305.25391.

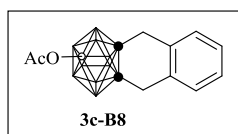

$^1\text{H}$  NMR (600MHz,  $\text{CDCl}_3$ , *ppm*):  $\delta$  7.24-7.22 (m, 2H), 7.06-7.05 (m, 2H), 3.72 (s, 2H), 3.71 (s, 2H), 2.07 (s, 3H);  $^{13}\text{C}\{^1\text{H}\}$  NMR (150MHz,  $\text{CDCl}_3$ , *ppm*):  $\delta$  170.4, 128.8, 128.7, 127.6, 66.4, 37.3, 22.5;  $^{11}\text{B}\{^1\text{H}\}$  NMR (192 MHz,  $\text{CDCl}_3$ , *ppm*):  $\delta$  5.3 (1B, *BOAc*), -5.7 (2B), -10.6 (2B), -11.9 (2B), -12.7 (2B), -16.8 (1B); HRMS: calculated for  $\text{C}_{12}\text{B}_{10}\text{H}_{21}\text{O}_2$  ( $\text{M}^+\text{+H}$ ) 305.25392; found: 305.25400.

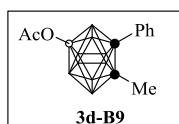

$^1\text{H}$  NMR (600MHz,  $\text{CDCl}_3$ , *ppm*):  $\delta$  7.64-7.63 (d,  $J=6\text{Hz}$ , 2H), 7.47-7.46 (dd,  $J=6\text{Hz}$ , 1H), 7.40-7.38 (dd,  $J=6\text{Hz}$ , 2H), 2.02 (s, 3H), 1.72 (s, 3H);  $^{13}\text{C}\{^1\text{H}\}$  NMR (150MHz,  $\text{CDCl}_3$ , *ppm*):  $\delta$  170.0, 131.0, 130.7, 130.6, 128.9, 77.9, 65.7, 22.6, 20.9;  $^{11}\text{B}\{^1\text{H}\}$  NMR (192 MHz,  $\text{CDCl}_3$ , *ppm*):  $\delta$  10.1 (1B, *BOAc*), -3.9 (2B), -10.1 (3B), -10.8 (2B), -11.8 (1B), -12.3 (1B); HRMS: calculated for  $\text{C}_{11}\text{B}_{10}\text{H}_{21}\text{O}_2$  ( $\text{M}^+\text{+H}$ ) 293.25392; found:



293.25378.

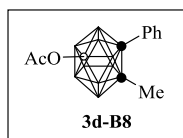

$^1\text{H}$  NMR (600MHz,  $\text{CDCl}_3$ , ppm):  $\delta$  7.69-7.68 (d,  $J=6\text{Hz}$ , 2H), 7.47-7.45 (dd,  $J=6\text{Hz}$ , 1H), 7.40-7.38 (dd,  $J=6\text{Hz}$ , 2H), 2.12 (s, 3H), 1.70 (s, 3H);  $^{13}\text{C}\{^1\text{H}\}$  NMR (150MHz,  $\text{CDCl}_3$ , ppm):  $\delta$  170.6, 131.4, 130.7, 130.3, 128.9, 72.3, 22.9, 22.6;  $^{11}\text{B}\{^1\text{H}\}$  NMR (192 MHz,  $\text{CDCl}_3$ , ppm):  $\delta$  5.0 (1B, *BOAc*), -3.7 (1B), -4.9 (1B), -10.2 (2B), -11.5 (3B), -13.2 (1B), -16.2 (1B); HRMS: calculated for  $\text{C}_{11}\text{B}_{10}\text{H}_{21}\text{O}_2$  ( $\text{M}^++\text{H}$ ) 293.25392; found: 293.25397.

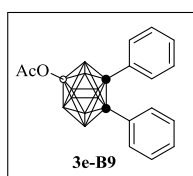

$^1\text{H}$  NMR (600MHz,  $\text{CDCl}_3$ , ppm):  $\delta$  7.45-7.40 (m, 4H), 7.25-7.21 (2H), 7.15-7.12 (m, 4H), 2.06 (s, 3H);  $^{13}\text{C}\{^1\text{H}\}$  NMR (150MHz,  $\text{CDCl}_3$ , ppm):  $\delta$  170.0, 130.9, 130.5, 130.3, 130.2, 129.1, 128.3, 128.2, 80.9, 73.7, 22.7;  $^{11}\text{B}\{^1\text{H}\}$  NMR (192 MHz,  $\text{CDCl}_3$ , ppm):  $\delta$  11.8 (1B, *BOAc*), -3.3 (2B), -9.9 (2B), -11.0 (3B), -13.4 (2B); HRMS: calculated for  $\text{C}_{16}\text{B}_{10}\text{H}_{23}\text{O}_2$  ( $\text{M}^++\text{H}$ ) 355.26957; found: 355.26974.

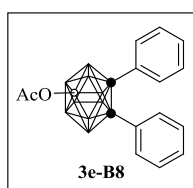

$^1\text{H}$  NMR (600MHz,  $\text{CDCl}_3$ , ppm):  $\delta$  7.46-7.45 (m, 4H), 7.24-7.22 (m, 2H), 7.15-7.12 (m, 4H), 2.16 (s, 3H);  $^{13}\text{C}\{^1\text{H}\}$  NMR (150MHz,  $\text{CDCl}_3$ , ppm):  $\delta$  170.6, 130.9, 130.3, 130.1, 128.3, 80.3, 22.7;  $^{11}\text{B}\{^1\text{H}\}$  NMR (192 MHz,  $\text{CDCl}_3$ , ppm):  $\delta$  4.9 (1B, *BOAc*), -2.9 (2B), -9.9 (2B), -11.2 (2B), -12.3 (1B), -13.5 (1B), -17.3 (1B); HRMS: calculated for  $\text{C}_{16}\text{B}_{10}\text{H}_{23}\text{O}_2$  ( $\text{M}^++\text{H}$ ) 355.26957; found: 355.26956.

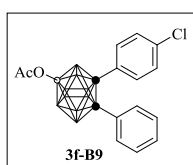

$^1\text{H}$  NMR (600MHz,  $\text{CDCl}_3$ , ppm):  $\delta$  7.45-7.44 (d,  $J=6\text{Hz}$ , 2H), 7.34-7.33 (d,  $J=6\text{Hz}$ ,

2H), 7.29-7.27 (dd,  $J=6\text{Hz}$ , 1H), 7.18-7.16 (dd,  $J=6\text{Hz}$ , 2H), 7.12-7.11 (d,  $J=6\text{Hz}$ , 2H), 2.06 (s, 3H);  $^{13}\text{C}\{^1\text{H}\}$  NMR (150MHz,  $\text{CDCl}_3$ , ppm):  $\delta$  170.0, 136.8, 131.8, 130.9, 130.6, 128.9, 128.8, 128.6, 128.5, 79.8, 73.8, 22.6;  $^{11}\text{B}\{^1\text{H}\}$  NMR (192 MHz,  $\text{CDCl}_3$ , ppm):  $\delta$  11.9 (1B, *BOAc*), -3.1 (2B), -10.0 (2B), -10.9 (3B), -13.6 (2B); HRMS: calculated for  $\text{C}_{16}\text{B}_{10}\text{H}_{22}\text{O}_2\text{Cl}$  ( $\text{M}^+\text{+H}$ ) 389.23060; found: 389.23102.

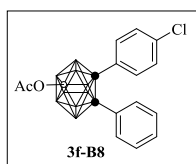

$^1\text{H}$  NMR (600MHz,  $\text{CDCl}_3$ , ppm):  $\delta$  7.46-7.45 (d,  $J=6\text{Hz}$ , 2H), 7.39-7.38 (d,  $J=6\text{Hz}$ , 2H), 7.28-7.26 (dd,  $J=6\text{Hz}$ , 1H), 7.18-7.16 (dd,  $J=6\text{Hz}$ , 2H), 7.12-7.11 (d,  $J=6\text{Hz}$ , 2H), 2.16 (s, 3H);  $^{13}\text{C}\{^1\text{H}\}$  NMR (150MHz,  $\text{CDCl}_3$ , ppm):  $\delta$  170.6, 136.8, 132.1, 131.8, 130.9, 130.6, 129.9, 128.6, 128.5, 80.4, 79.2, 22.7;  $^{11}\text{B}\{^1\text{H}\}$  NMR (192 MHz,  $\text{CDCl}_3$ , ppm):  $\delta$  5.0 (1B, *BOAc*), -2.8 (2B), -9.9 (2B), -11.1 (3B), -13.4 (1B), -17.3 (1B); HRMS: calculated for  $\text{C}_{16}\text{B}_{10}\text{H}_{22}\text{O}_2\text{Cl}$  ( $\text{M}^+\text{+H}$ ) 389.23060; found: 389.23077.

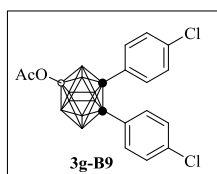

$^1\text{H}$  NMR (600MHz,  $\text{CDCl}_3$ , ppm):  $\delta$  7.38-7.37 (d,  $J=6\text{Hz}$ , 2H), 7.34-7.33 (d,  $J=6\text{Hz}$ , 2H), 7.16-7.15 (d,  $J=6\text{Hz}$ , 4H), 2.06 (s, 3H);  $^{13}\text{C}\{^1\text{H}\}$  NMR (150MHz,  $\text{CDCl}_3$ , ppm):  $\delta$  170.0, 137.1, 132.2, 132.1, 131.8, 128.8, 128.7, 127.6, 79.9, 72.8, 22.6;  $^{11}\text{B}\{^1\text{H}\}$  NMR (192 MHz,  $\text{CDCl}_3$ , ppm):  $\delta$  12.0 (1B, *BOAc*), -3.1 (2B), -9.9 (2B), -10.8 (3B), -13.6 (2B); HRMS: calculated for  $\text{C}_{16}\text{B}_{10}\text{H}_{21}\text{Cl}_2\text{O}_2$  ( $\text{M}^+\text{+H}$ ) 423.19163; found: 423.19153.

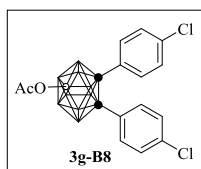

$^1\text{H}$  NMR (600MHz,  $\text{CDCl}_3$ , ppm):  $\delta$  7.40-7.38 (d,  $J=12\text{Hz}$ , 4H), 7.16-7.14 (d,  $J=12\text{Hz}$ , 4H), 2.15 (s, 3H);  $^{13}\text{C}\{^1\text{H}\}$  NMR (150MHz,  $\text{CDCl}_3$ , ppm):  $\delta$  170.6, 137.1, 132.1, 128.8, 128.5, 79.3, 22.7;  $^{11}\text{B}\{^1\text{H}\}$  NMR (192 MHz,  $\text{CDCl}_3$ , ppm):  $\delta$  4.7 (1B, *BOAc*),

-3.1 (2B), -10.3 (2B), -11.6 (2B), -12.8 (1B), -13.7 (1B), -17.8 (1B); HRMS: calculated for  $C_{16}B_{10}H_{21}Cl_2O_2$  ( $M^+ + H$ ) 423.19163; found: 423.19186.

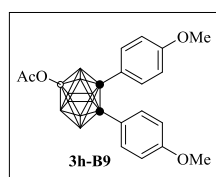

$^1H$  NMR (600MHz,  $CDCl_3$ , ppm):  $\delta$  7.37-7.35 (d,  $J=12$ Hz, 2H), 7.33-7.31 (d,  $J=12$ Hz, 2H), 6.65-6.63 (d,  $J=12$ Hz, 2H), 6.64-6.62 (d,  $J=12$ Hz, 2H), 3.72 (s, 6H), 2.05 (s, 3H);  $^{13}C\{^1H\}$  NMR (150MHz,  $CDCl_3$ , ppm):  $\delta$  170.1, 160.9, 160.8, 132.5, 132.1, 122.8, 121.4, 113.6, 113.5, 81.8, 74.4, 55.3, 22.7;  $^{11}B\{^1H\}$  NMR (192 MHz,  $CDCl_3$ , ppm):  $\delta$  11.6 (1B, *BOAc*), -3.7 (2B), -9.9 (2B), -11.4 (3B), -13.4 (2B); HRMS: calculated for  $C_{18}B_{10}H_{27}O_4$  ( $M^+ + H$ ) 415.29070; found: 415.29068.

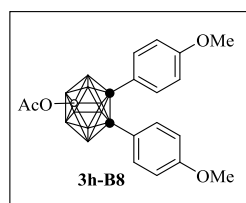

$^1H$  NMR (600MHz,  $CDCl_3$ , ppm):  $\delta$  7.38-7.37 (d,  $J=6$ Hz, 4H), 6.64-6.63 (d,  $J=6$ Hz, 4H), 3.72 (s, 6H), 2.15 (s, 3H);  $^{13}C\{^1H\}$  NMR (150MHz,  $CDCl_3$ , ppm):  $\delta$  170.8, 160.9, 132.4, 132.1, 122.6, 113.5, 81.2, 55.3, 22.7;  $^{11}B\{^1H\}$  NMR (192 MHz,  $CDCl_3$ , ppm):  $\delta$  4.6 (1B, *BOAc*), -3.4 (2B), -10.1 (1B), -11.5 (2B), -13.9 (2B), -17.6 (2B); HRMS: calculated for  $C_{18}B_{10}H_{27}O_4$  ( $M^+ + H$ ) 415.29070; found: 415.29071.

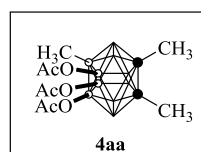

$^1H$  NMR (400MHz,  $CDCl_3$ , ppm):  $\delta$  2.07 (s, 9H), 2.05 (s, 3H), 0.17 (3H);  $^{13}C\{^1H\}$  NMR (100MHz,  $CDCl_3$ , ppm):  $\delta$  170.2, 169.6, 53.4, 53.3, 29.7, 22.7, 22.3, 22.2;  $^{11}B\{^1H\}$  NMR (128 MHz,  $CDCl_3$ , ppm):  $\delta$  4.9 (1B, *BOAc*), 0.1 (1B, *BOAc*), -0.7 (2B, *BCH\_3*), -15.5 (3B), -17.9 (3B); HRMS: calculated for  $C_{11}B_{10}H_{25}O_6$  ( $M^+ + H$ ) 361.26488; found: 361.26486.

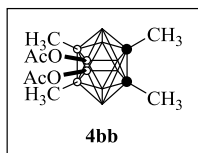

$^1\text{H}$  NMR (400MHz,  $\text{CDCl}_3$ , *ppm*):  $\delta$  2.08 (s, 6H), 2.04 (s, 6H), 0.07 (s, 6H);  $^{13}\text{C}\{^1\text{H}\}$  NMR (100MHz,  $\text{CDCl}_3$ , *ppm*):  $\delta$  170.5, 57.0, 33.2, 22.3, 22.2;  $^{11}\text{B}\{^1\text{H}\}$  NMR (128 MHz,  $\text{CDCl}_3$ , *ppm*):  $\delta$  1.7 (2B, *BOAc*), 1.1 (2B, *BCH<sub>3</sub>*), -13.4 (4B), -16.6 (2B); HRMS: calculated for  $\text{C}_{10}\text{B}_{10}\text{H}_{25}\text{O}_4$  ( $\text{M}^+ + \text{H}$ ) 317.27505; found: 317.27505.

Copies of  $^1\text{H}$  NMR,  $^{13}\text{C}\{^1\text{H}\}$  NMR,  $^{11}\text{B}\{^1\text{H}\}$  and  $^{11}\text{B}$  NMR

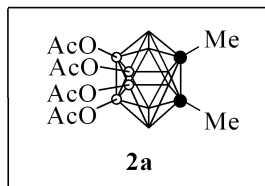

— 7.26

2.11  
2.08  
2.08

— 0.01

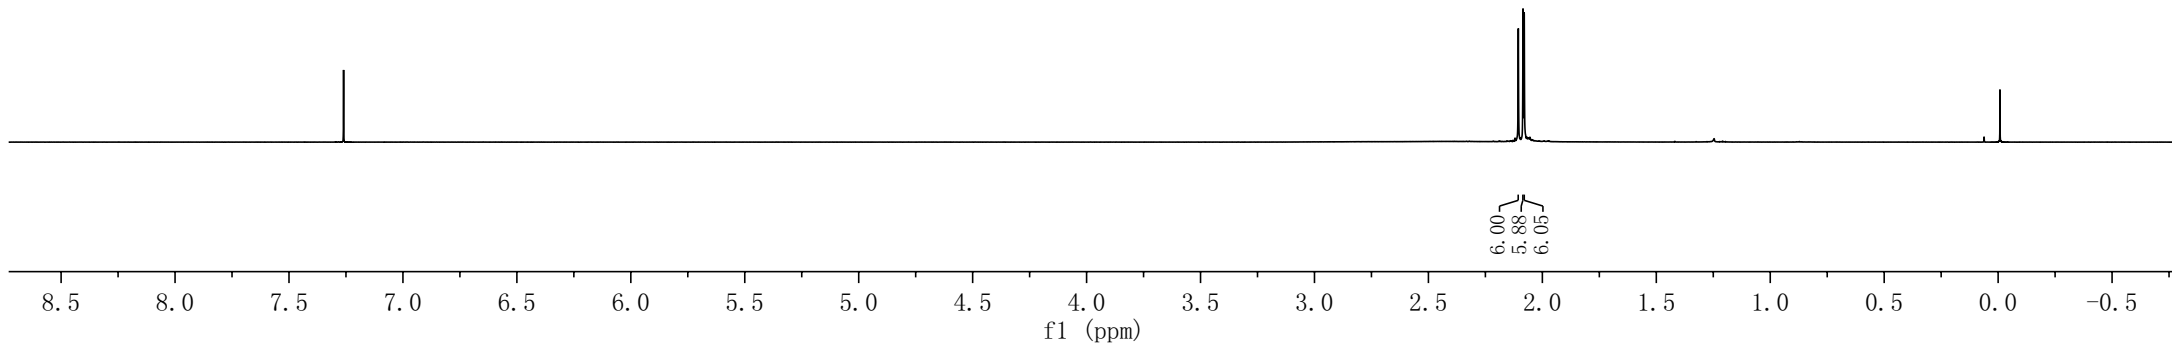

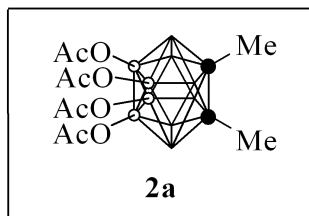170.07  
169.5577.21  
77.00  
76.79

50.11

22.32  
21.71

-0.03

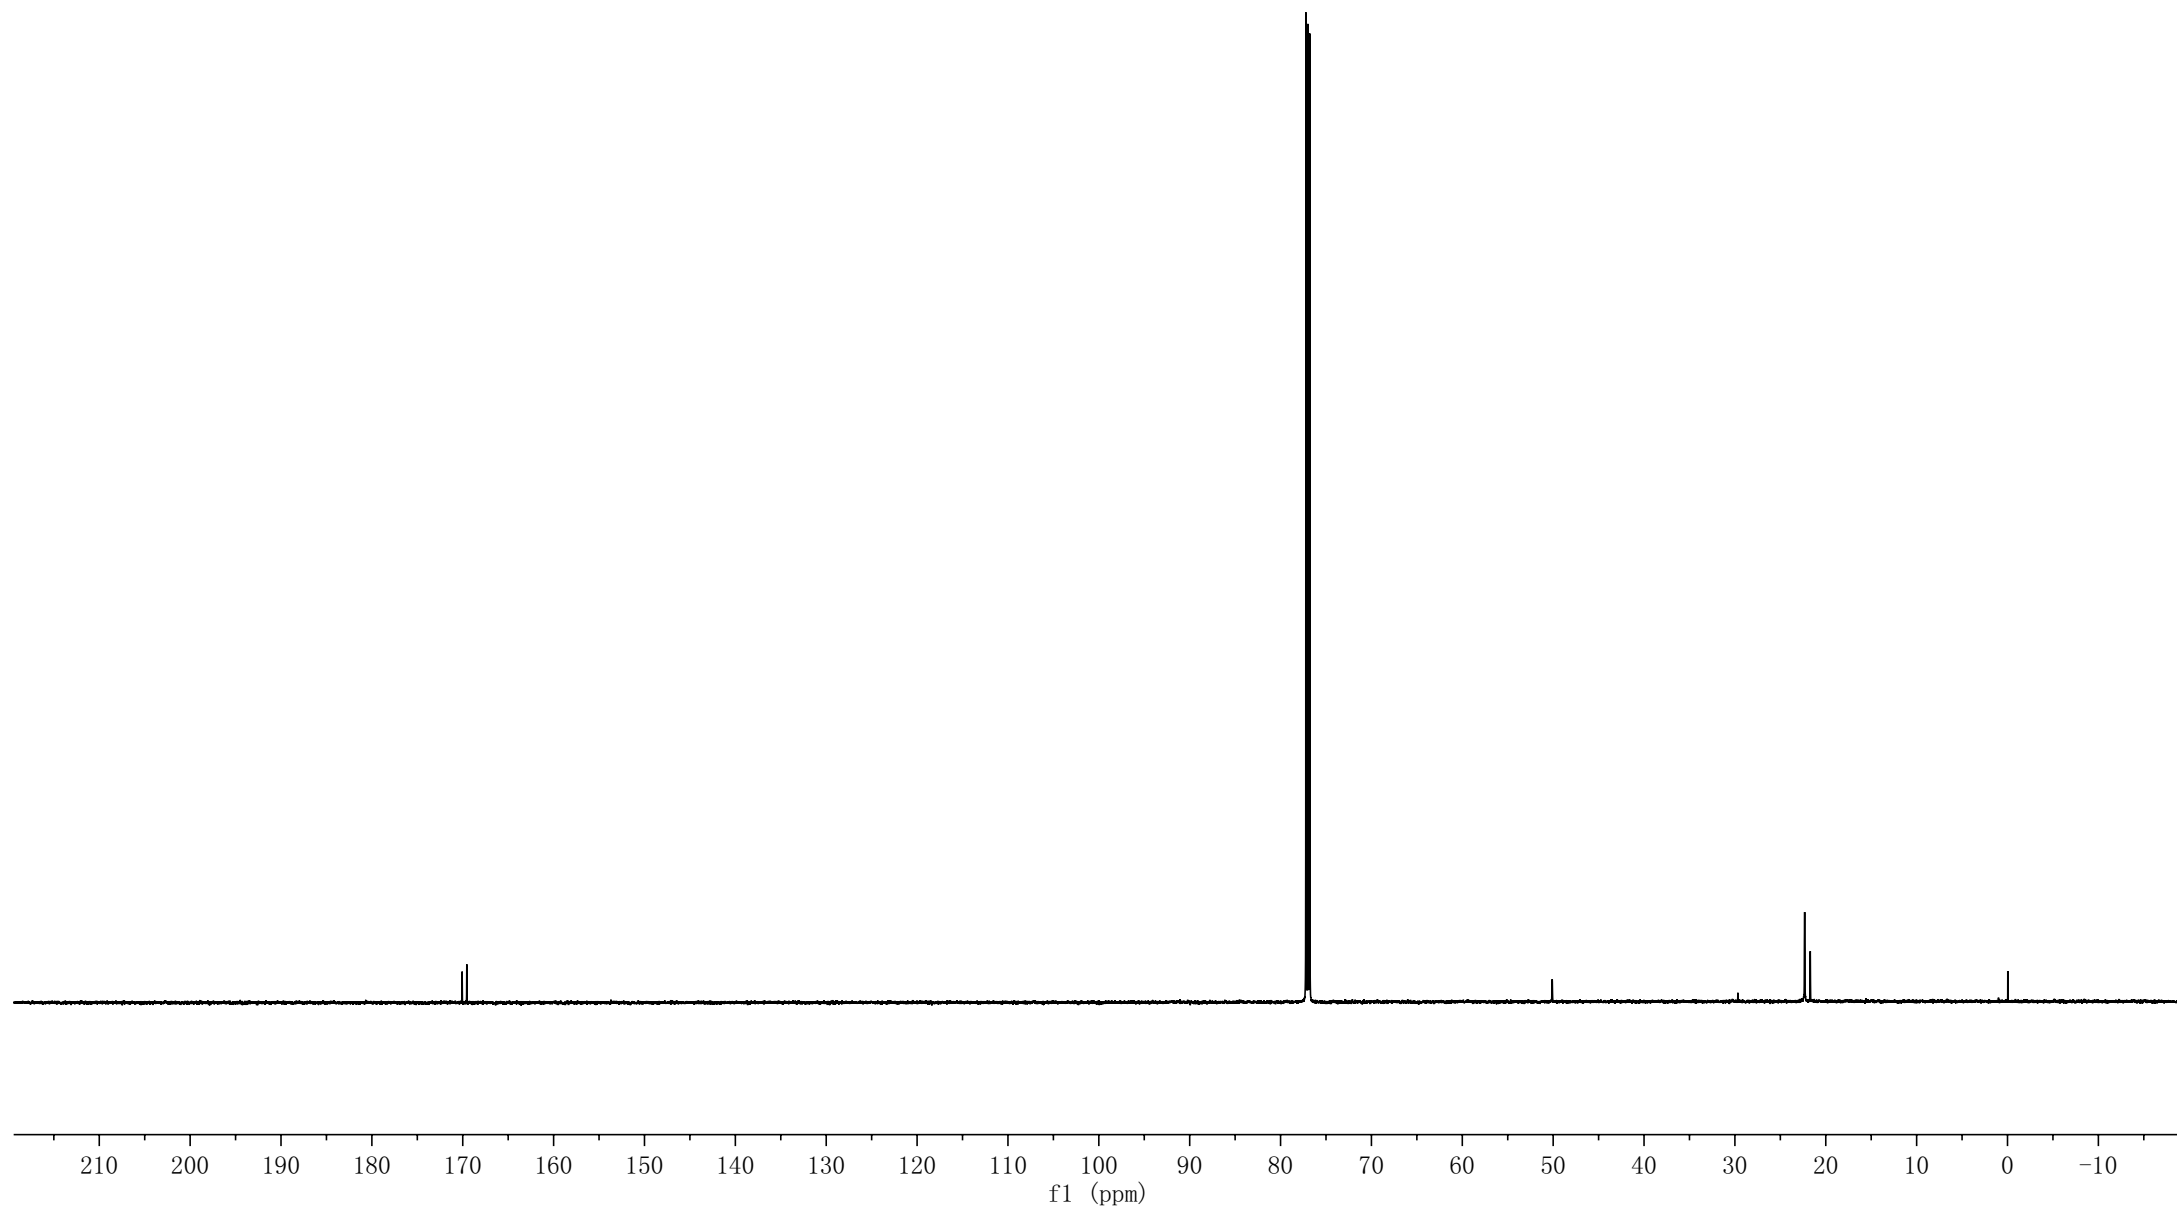

WJ-493-B{H}

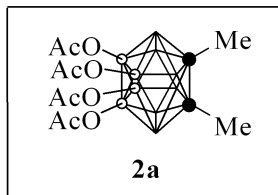

— 3.23

— 2.15

— 16.57

— 19.21

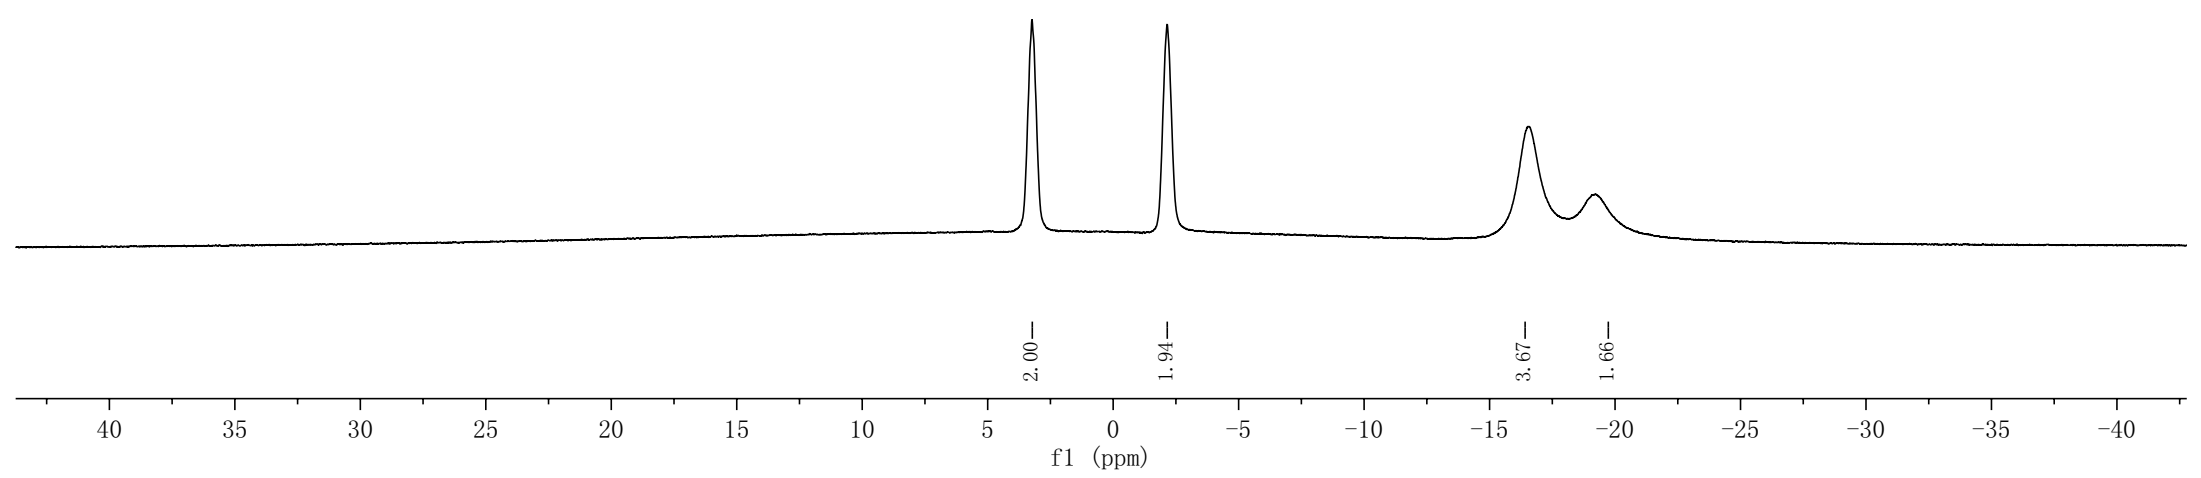

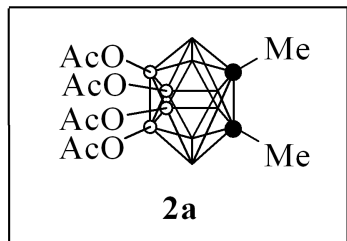

—3.23

—2.15

—16.18

—16.93

—18.79

—19.65

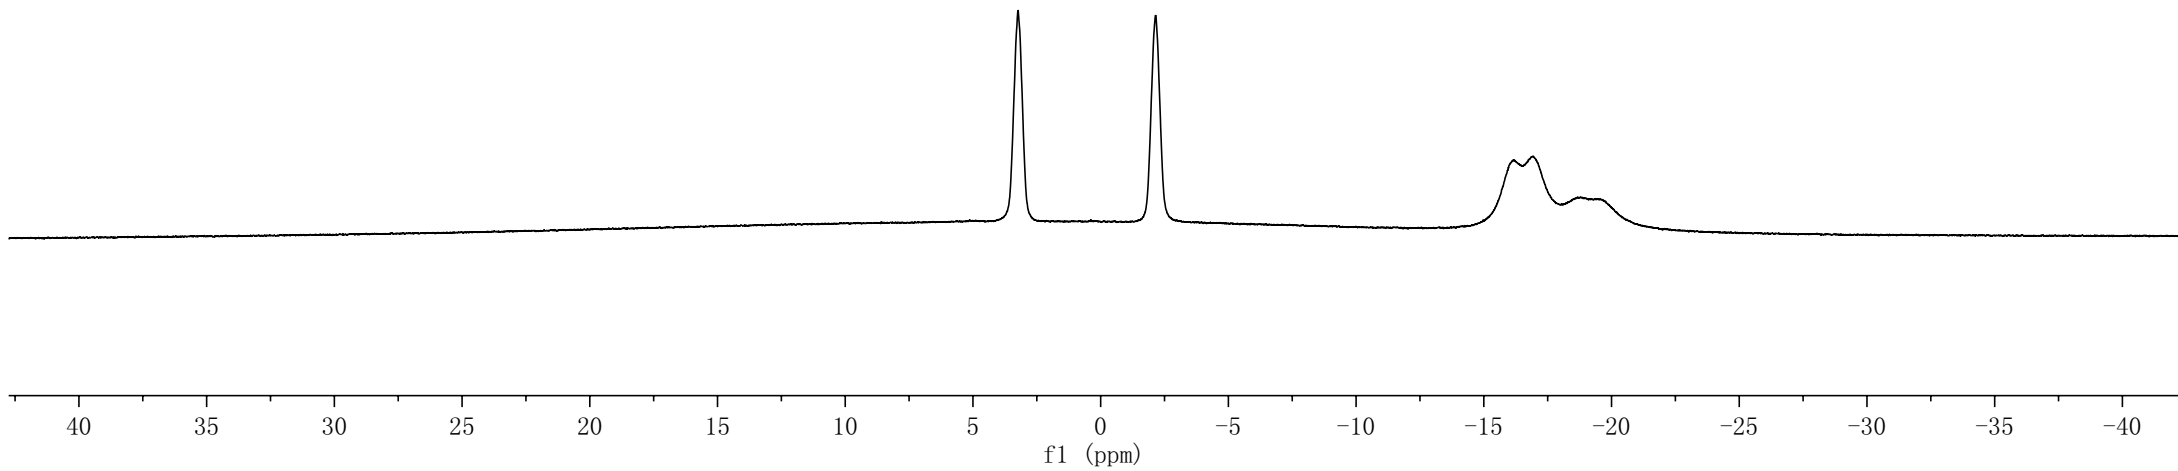



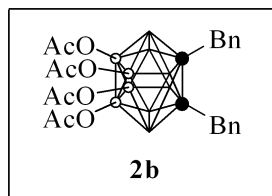

7.37  
7.37  
7.37  
7.36  
7.35  
7.35  
7.35  
7.34  
7.34  
7.34  
7.26  
7.24  
7.24  
7.23  
7.22  
7.22

— 3.69

2.02  
2.00

— 0.01

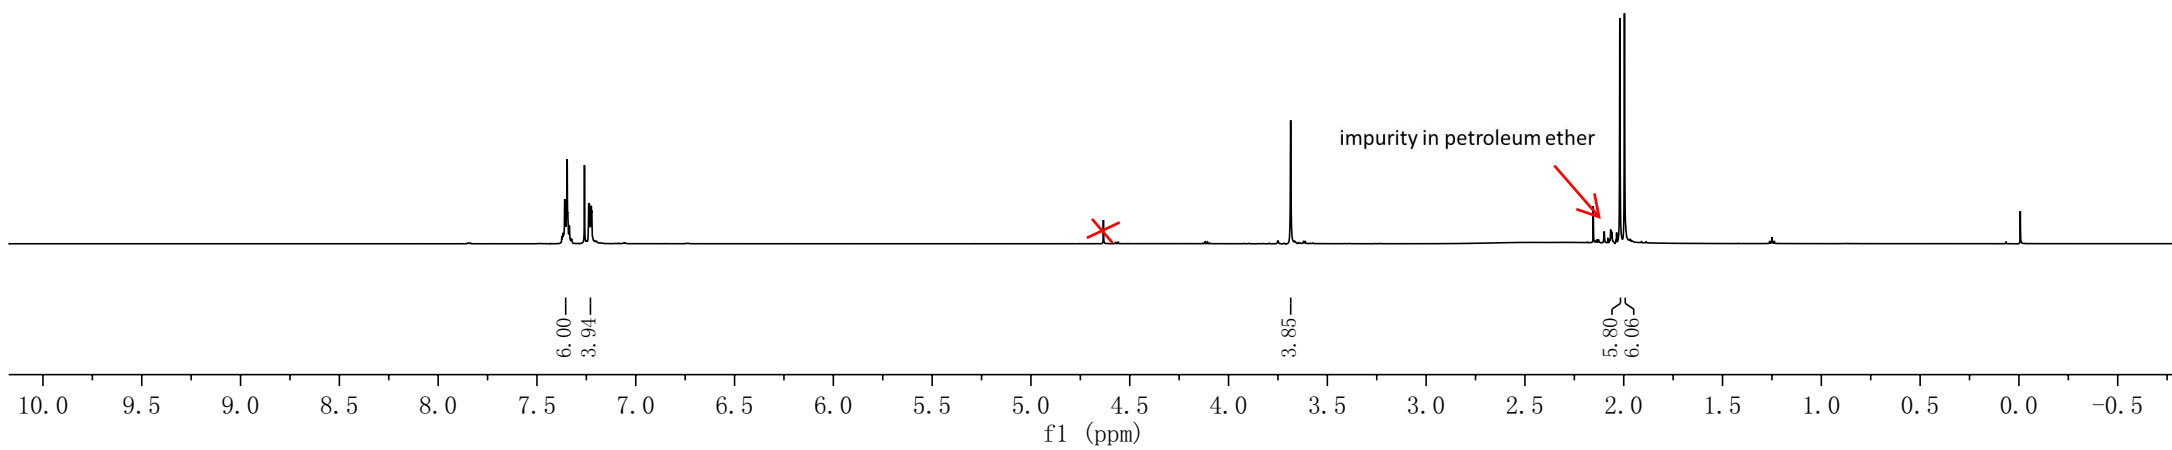

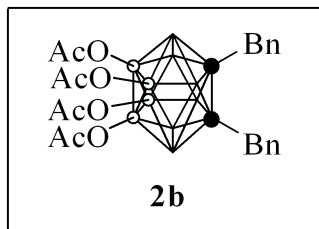

170.05  
169.33

134.34  
130.23  
128.85  
128.44

77.21  
77.00  
76.79

60.23  
55.87

39.42

22.28  
22.21

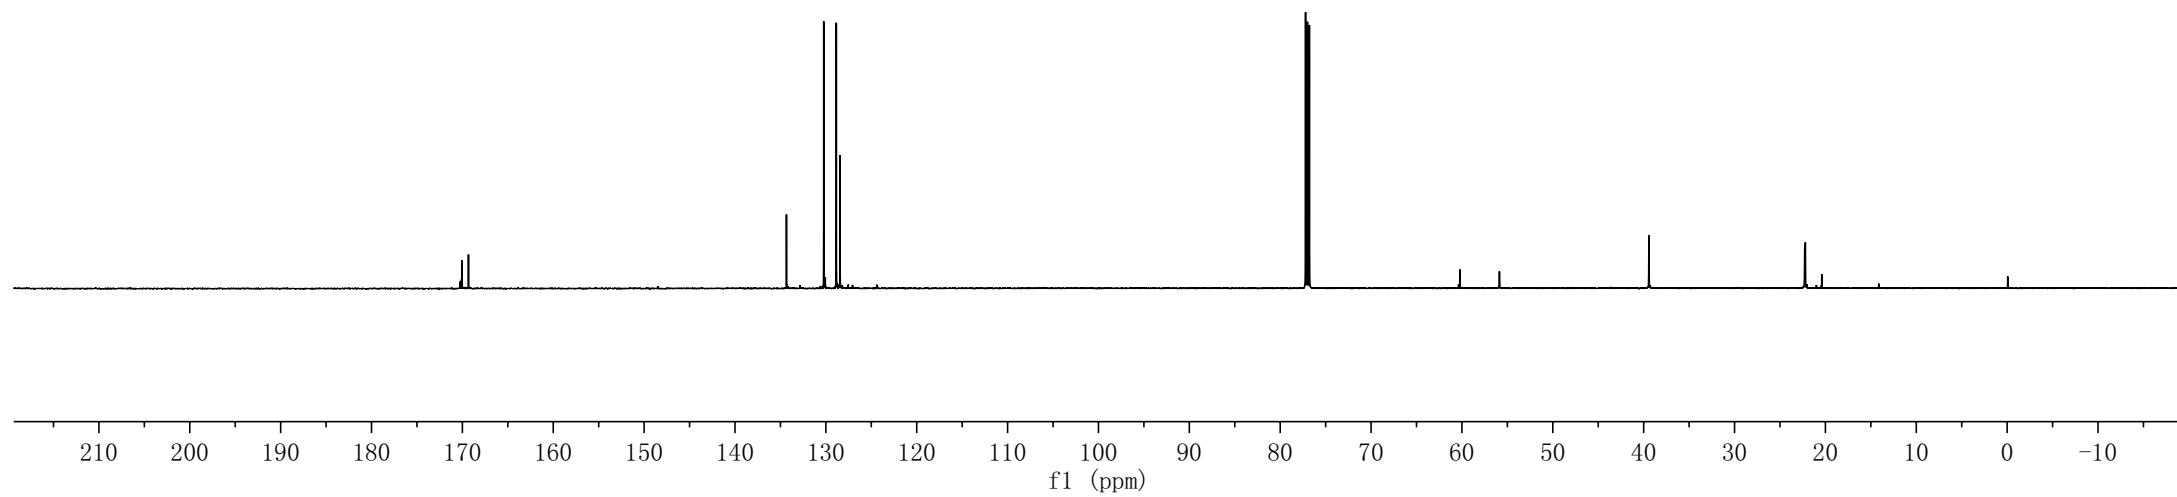

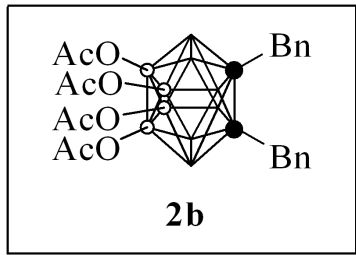

—3.66

—1.76

—17.65

—20.62

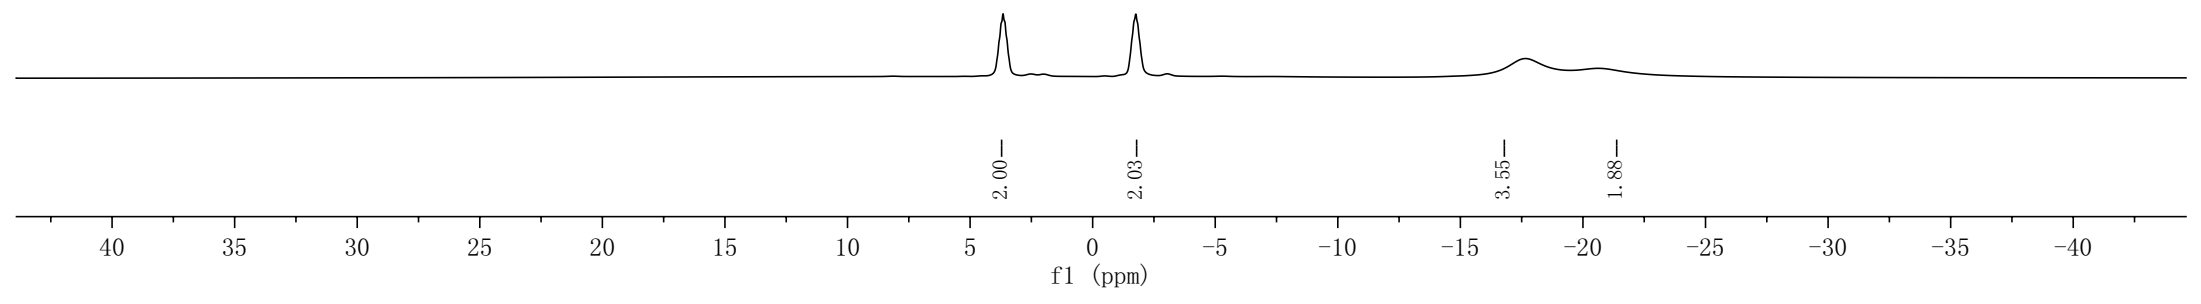

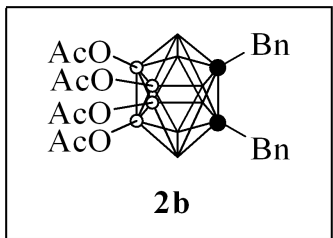

— 3.66

— 1.76

— 17.84

— 20.43

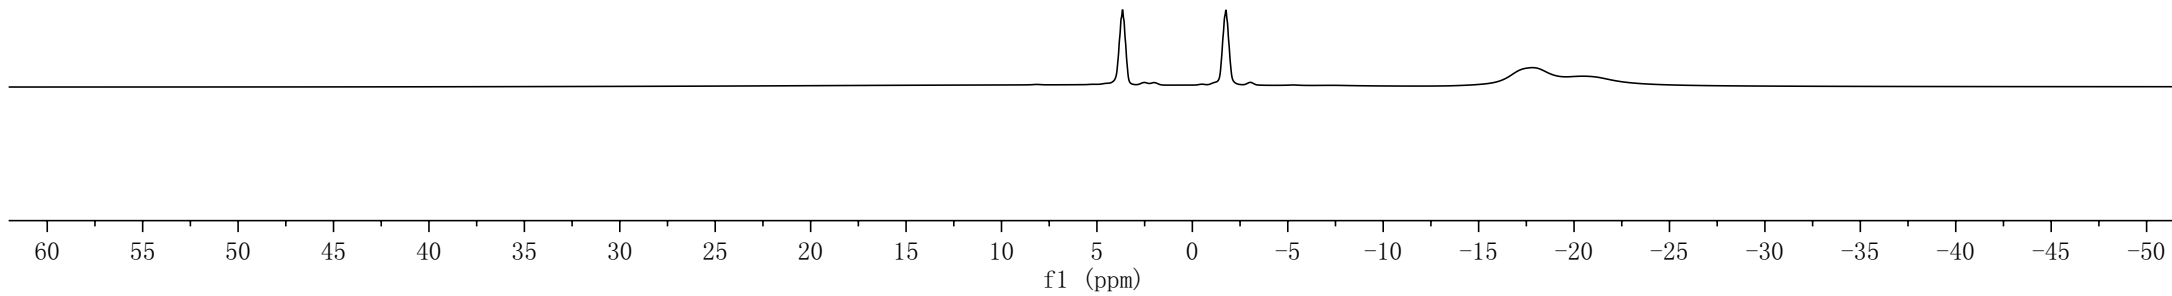

7.26

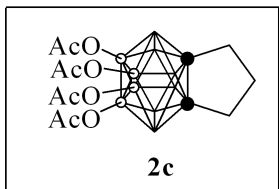

2.60  
2.59  
2.58  
2.56  
2.55  
2.55  
2.54  
2.54  
2.09

-0.01

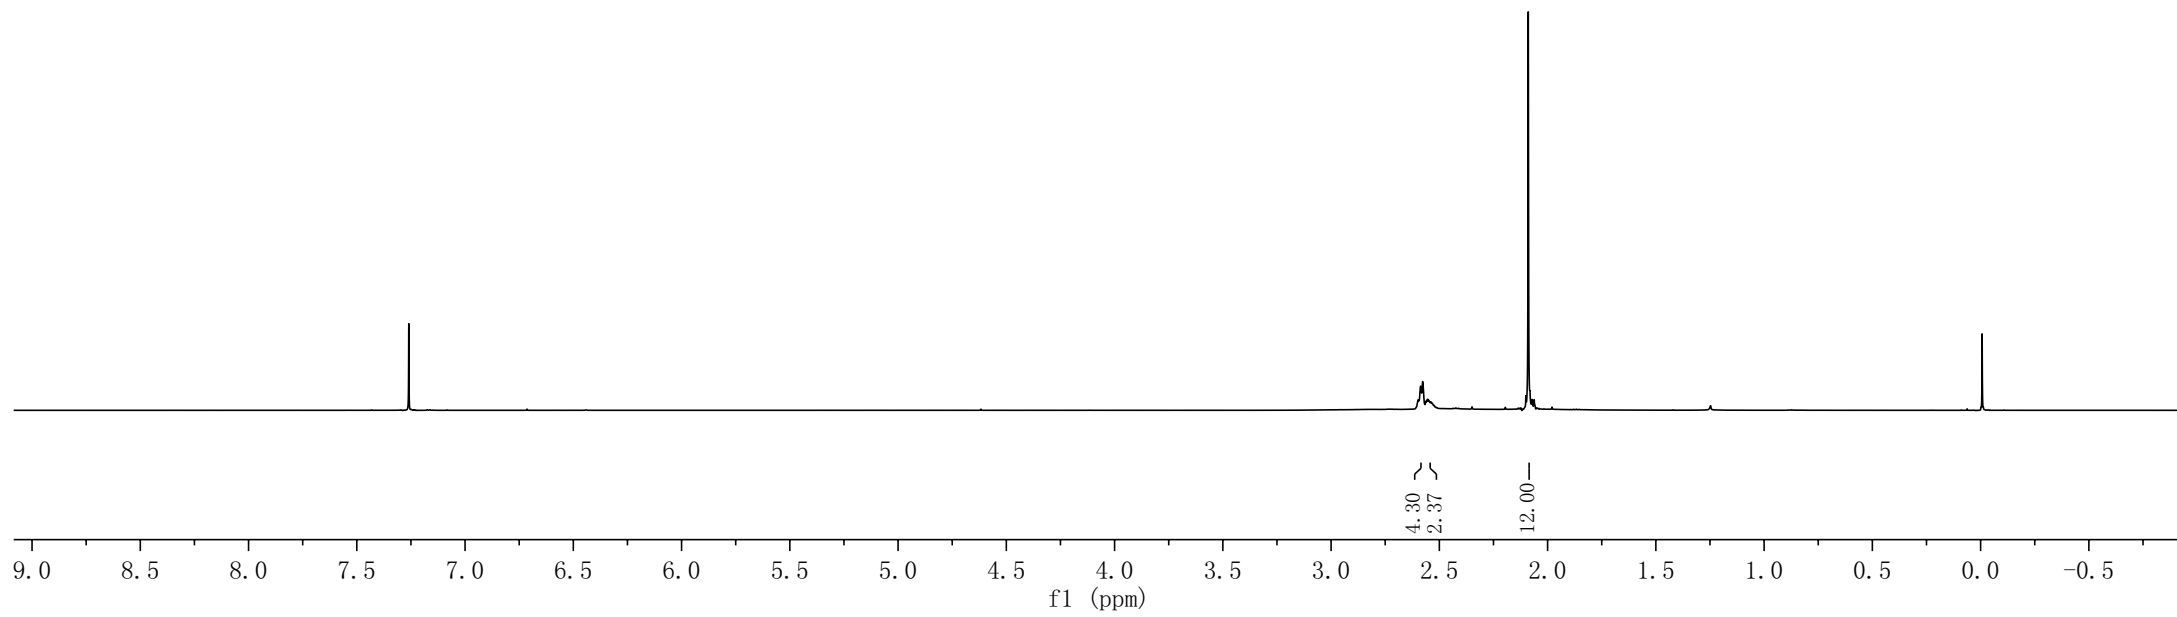

WJ-522-C

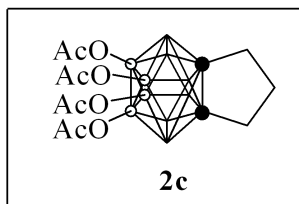

170.10  
169.60

77.21  
77.00  
76.79

61.71

33.52  
32.93

22.35

0.03

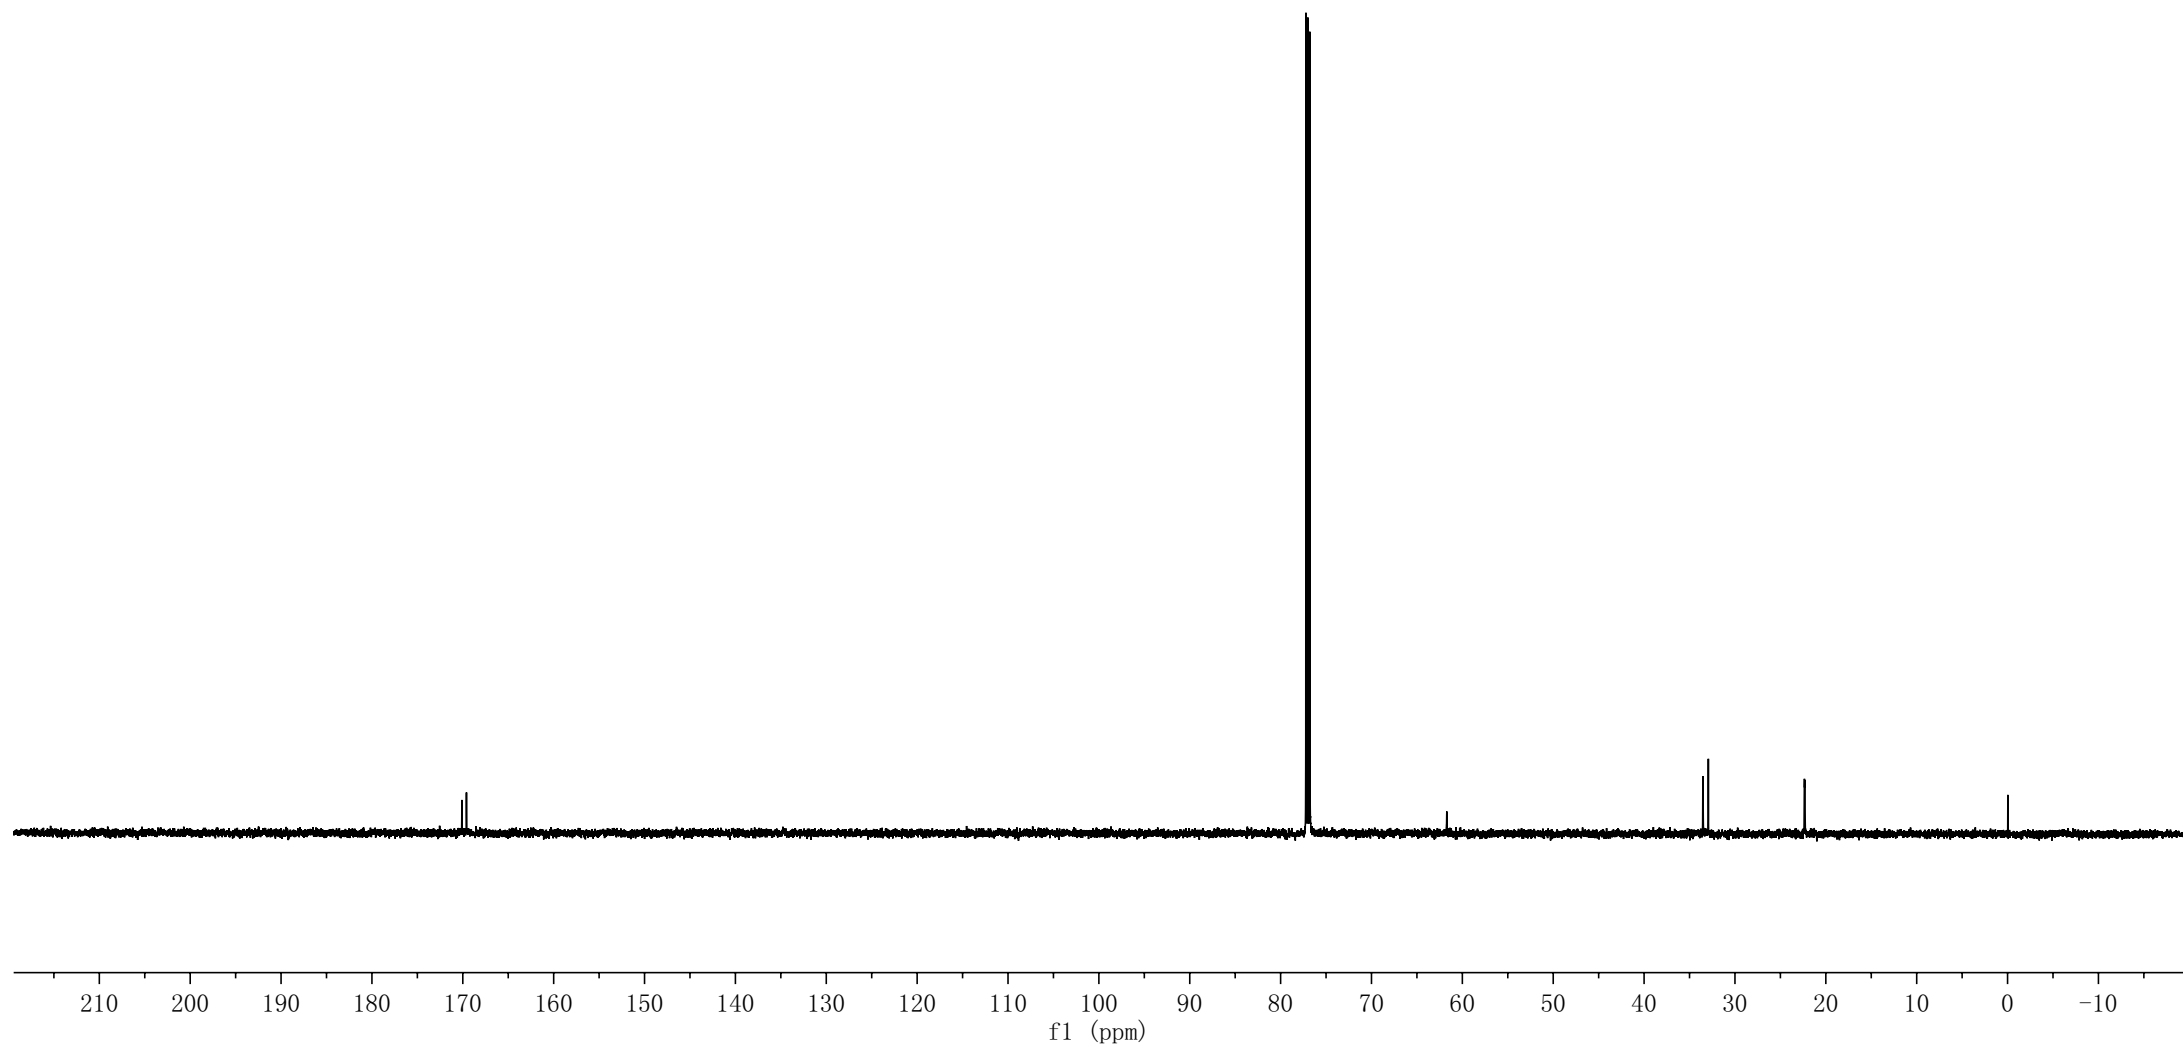

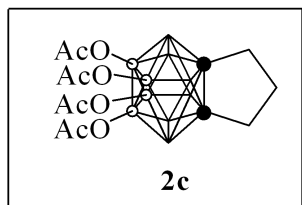

—2.31  
—0.38

—18.46  
—20.12

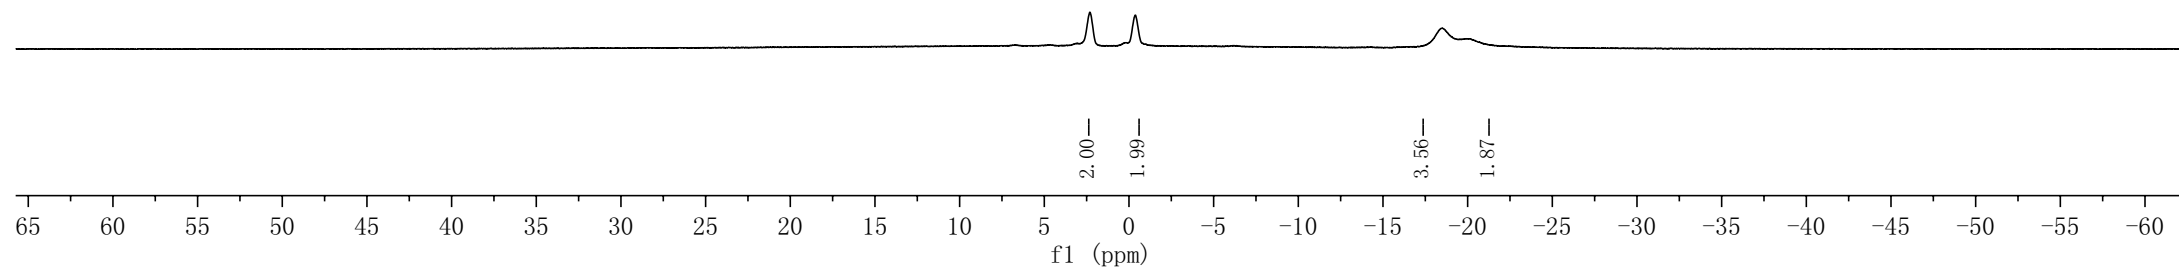

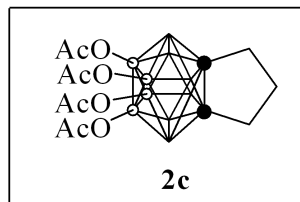

— 2.31  
— 0.38

— 18.11  
— 18.89  
— 20.21

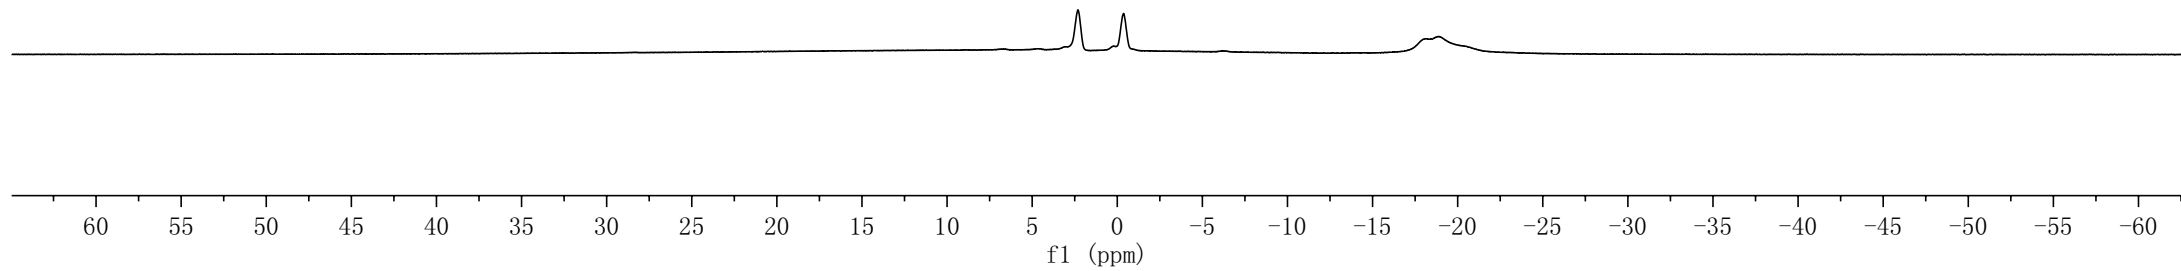



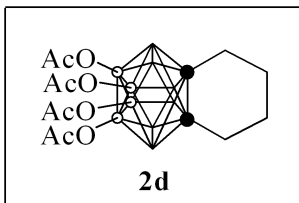

— 7.26

— 2.51

— 2.08  
— 2.08

— 1.62

— 0.01

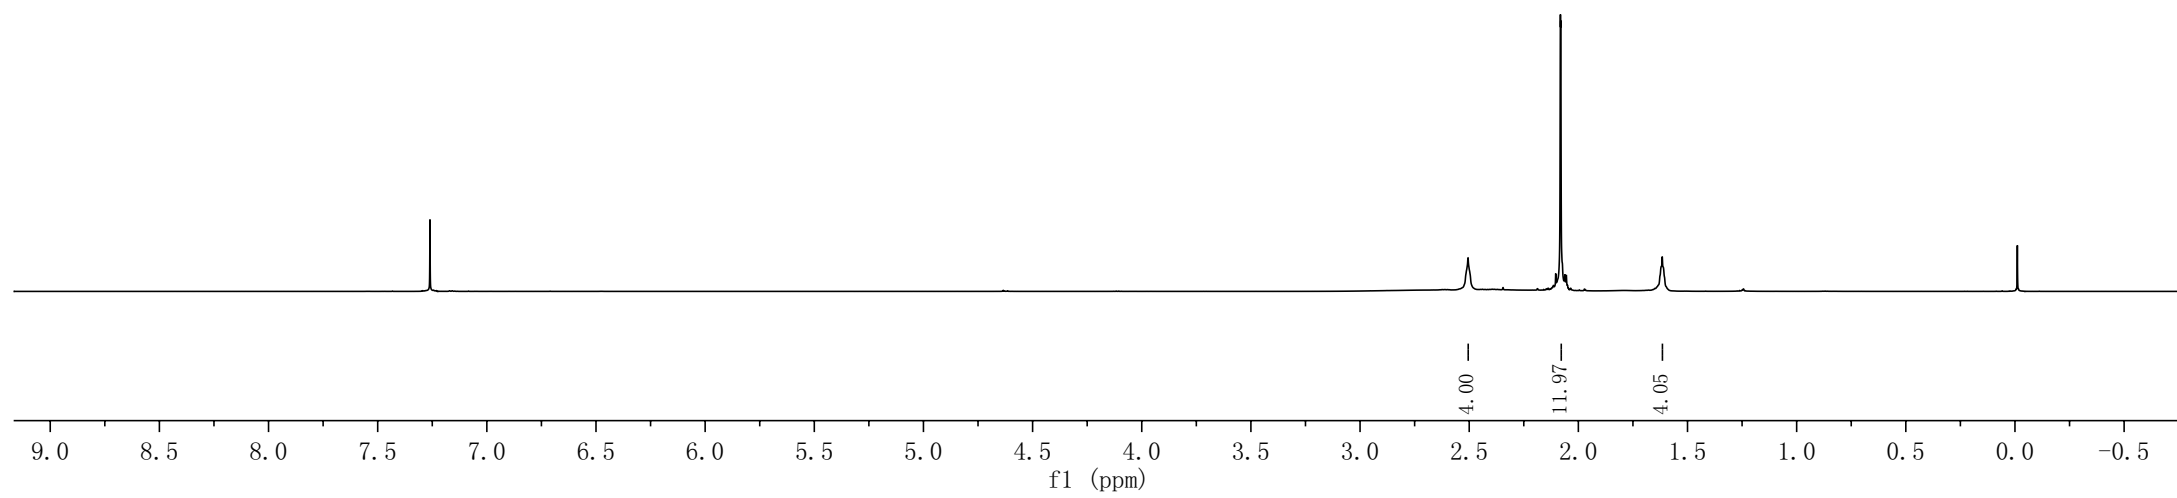

170.04  
169.5677.21  
77.00  
76.79

49.51

31.19

22.32  
19.30

-0.04

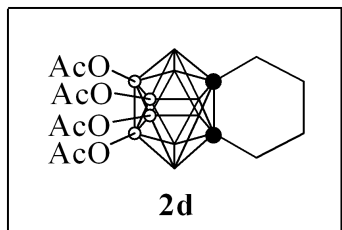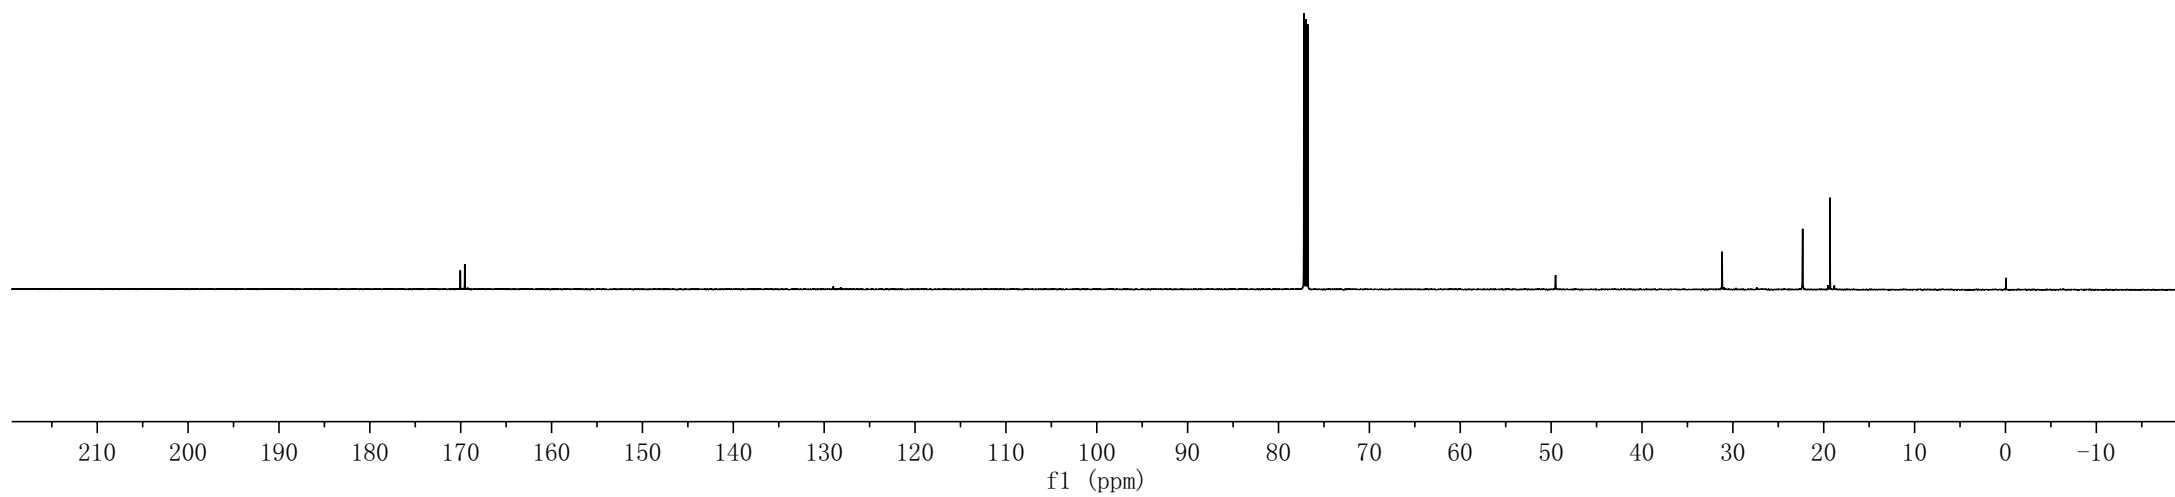

WJ-523-B{H}

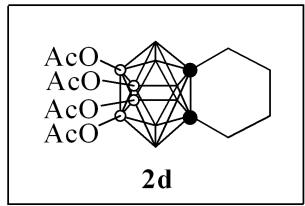

—2.68

—1.25

—16.75

—22.76

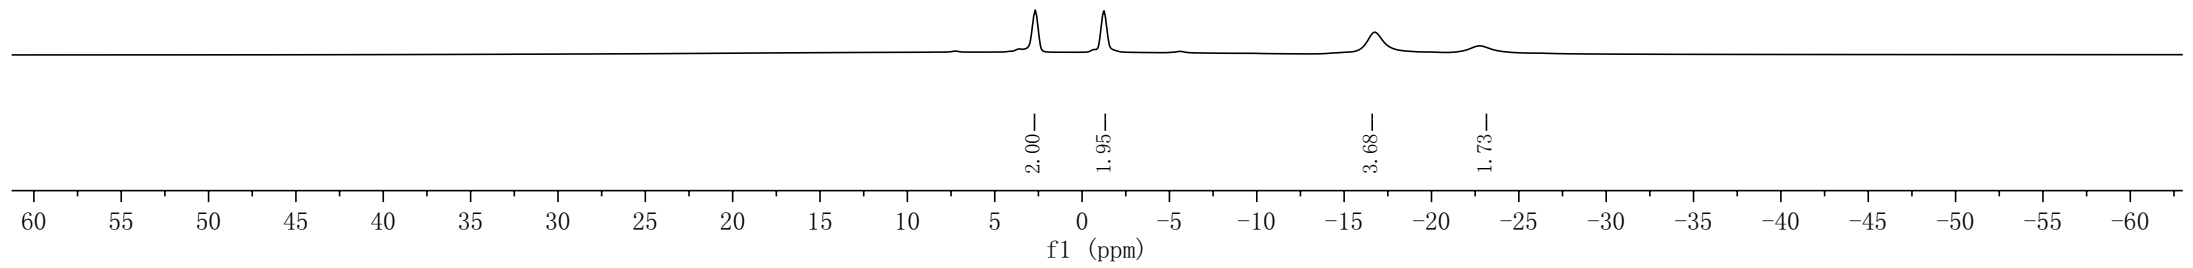

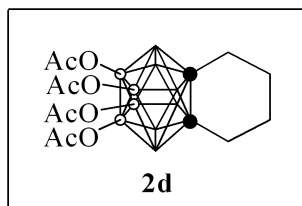

— 2.68

— 1.25

— 16.39

— 17.07

— 22.54

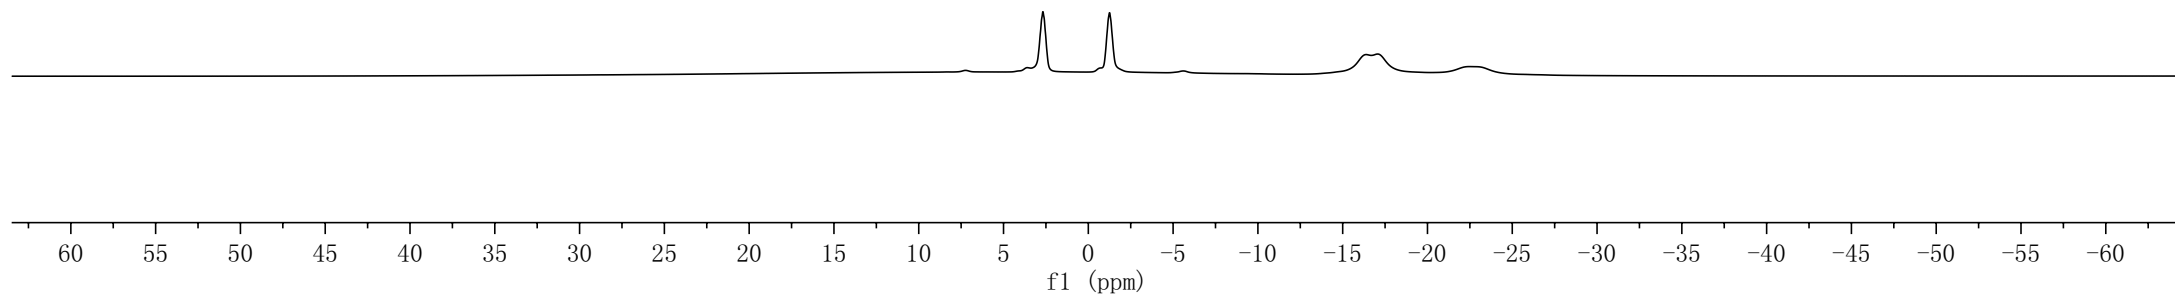

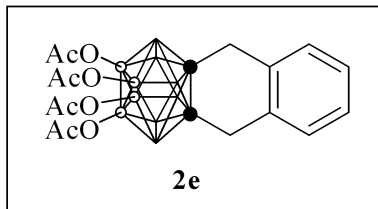

7.27  
7.26  
7.26  
7.26  
7.26  
7.26  
7.26  
7.26  
7.26  
7.24  
7.24  
7.23  
7.08  
7.07  
7.06

—3.78

2.12  
2.08

0.00  
-0.01

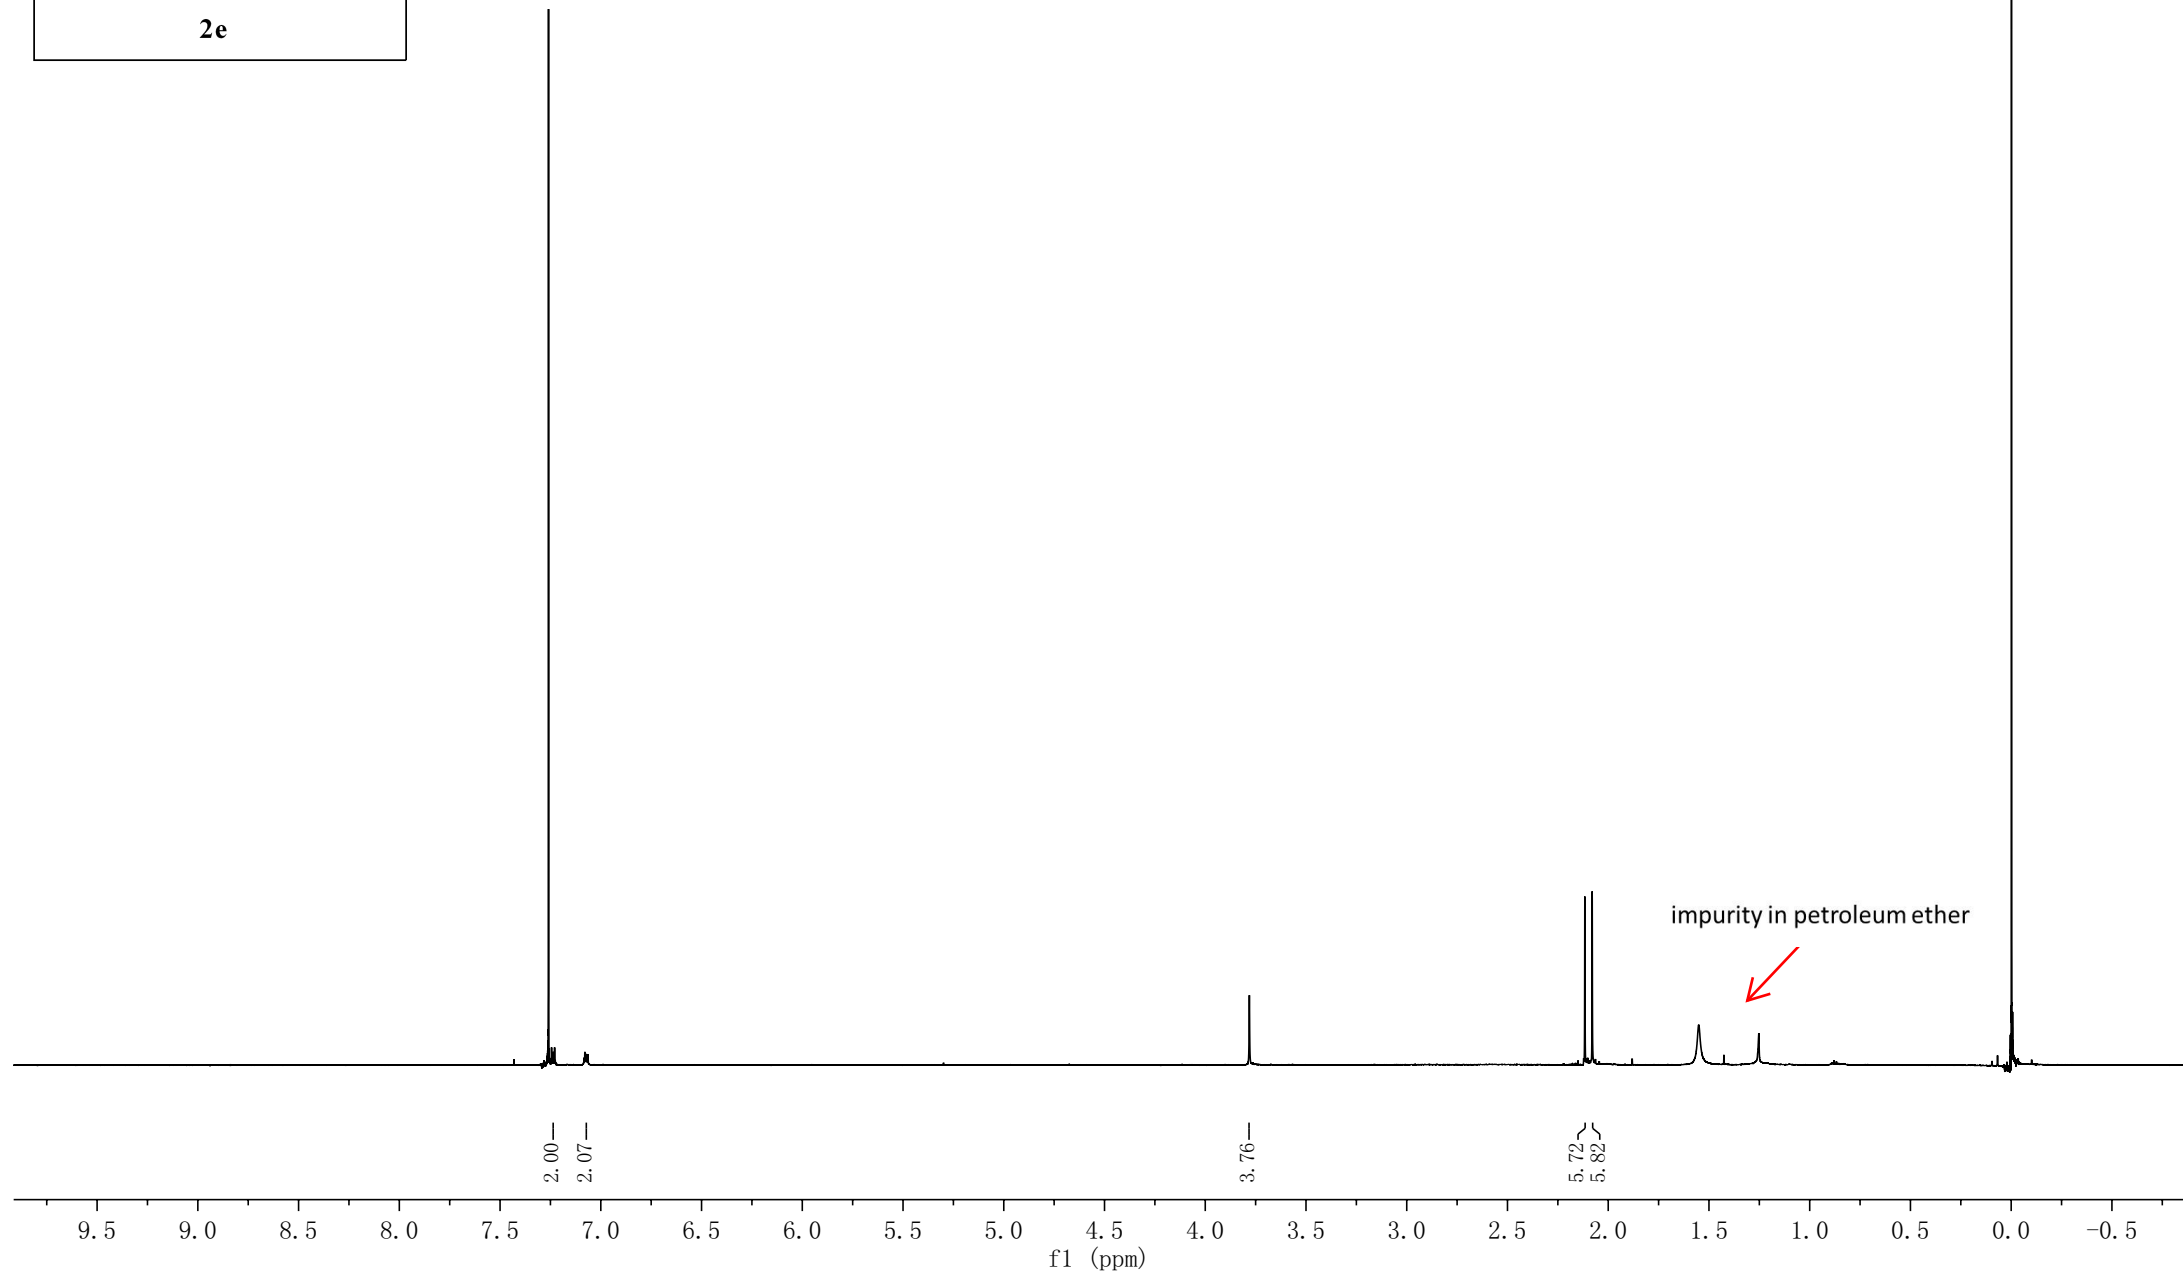

169.97  
169.56128.78  
128.46  
127.8077.21  
77.00  
76.79

48.16

36.08

22.36  
22.29

-0.02

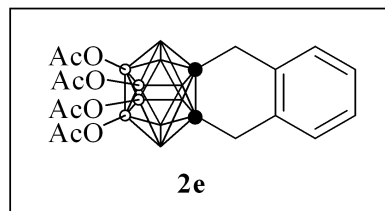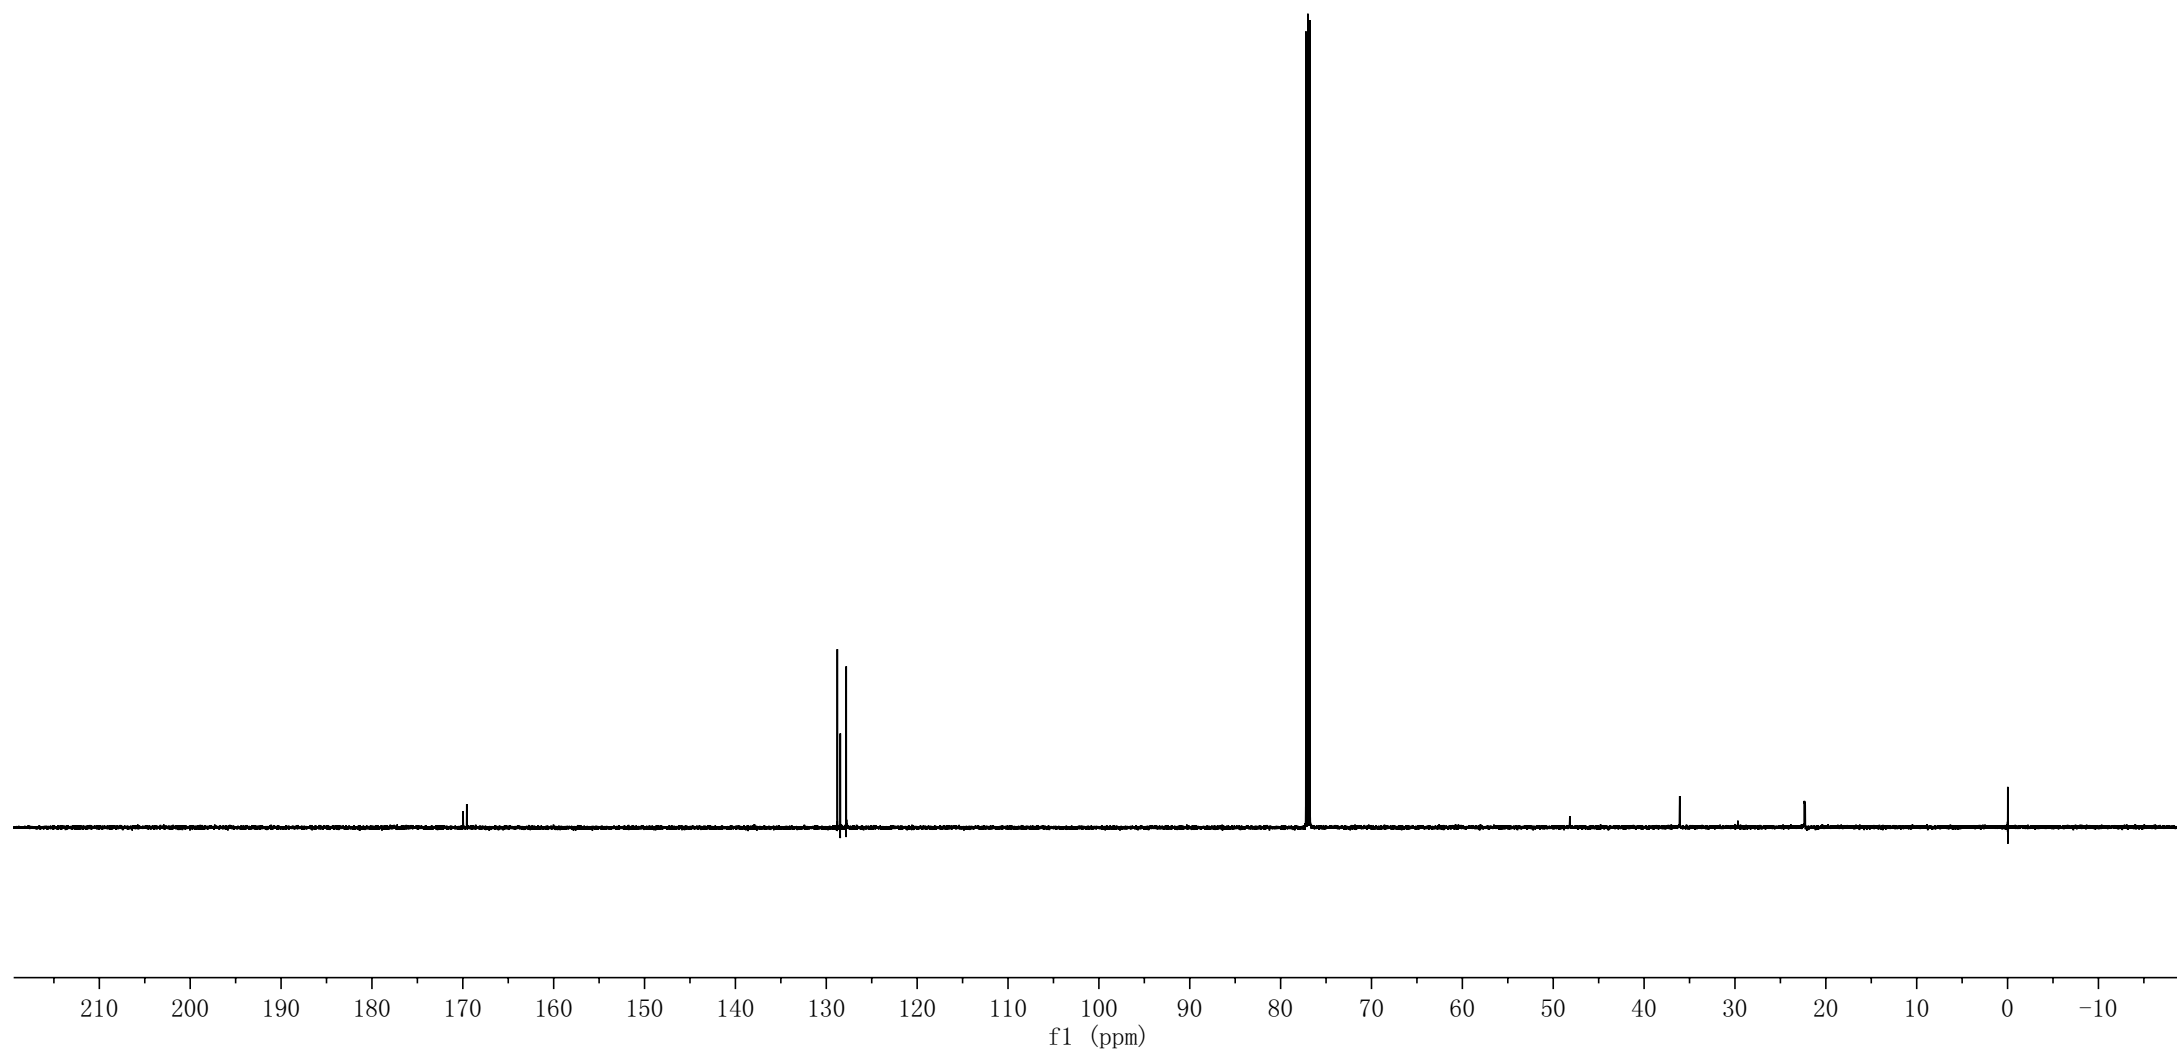

WJ-617-B{H}

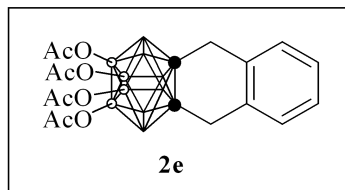

—3.17

—1.70

—16.89

—22.04

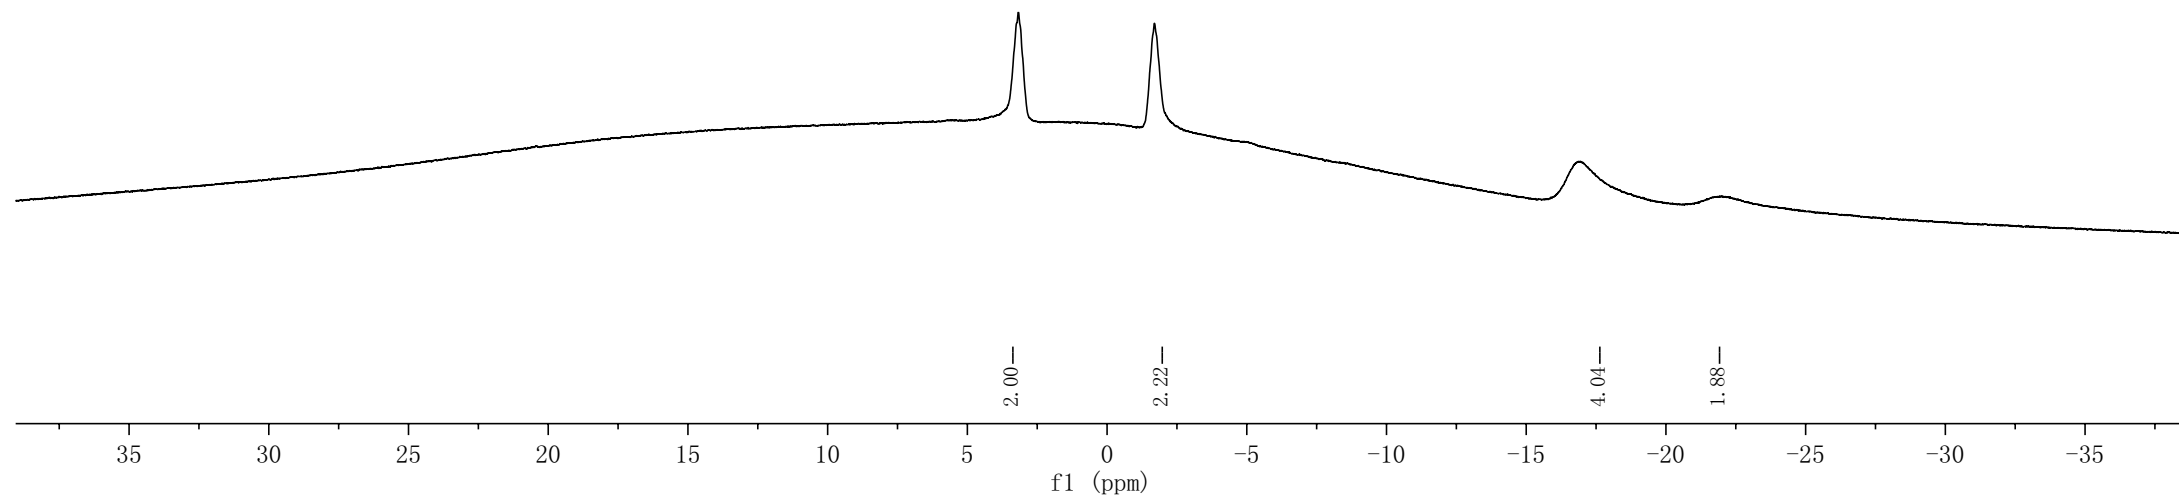

WJ-617-B

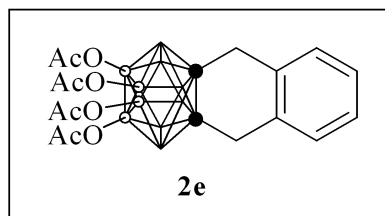

—3.18

—1.70

—17.20

—22.13

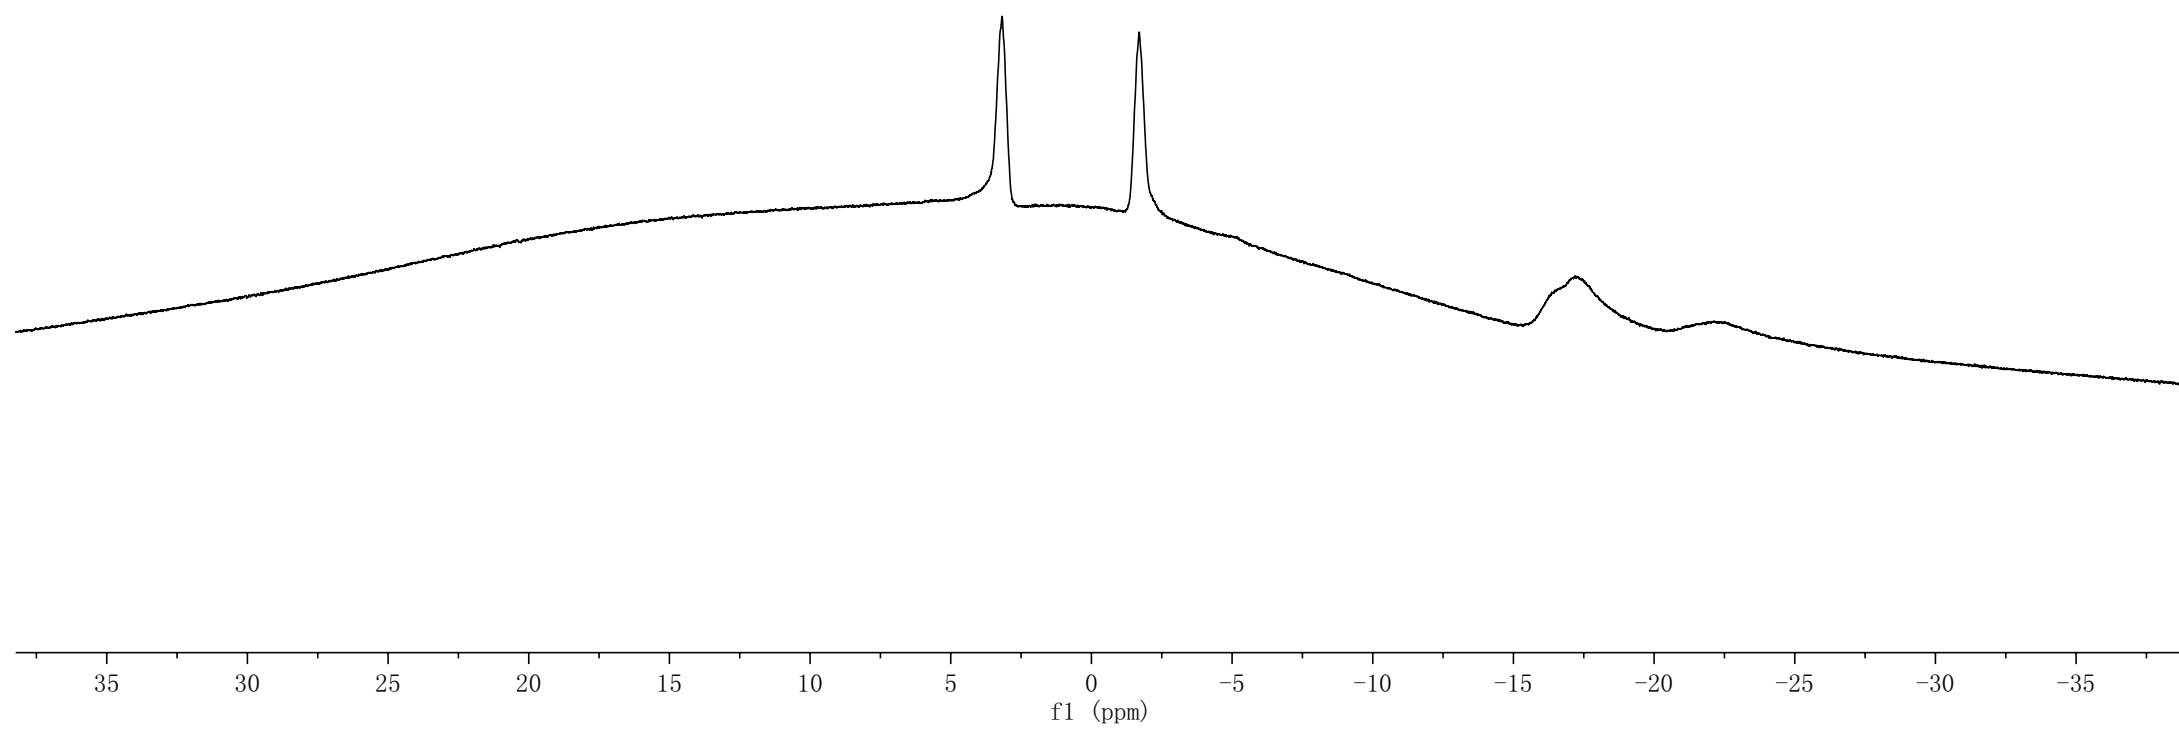



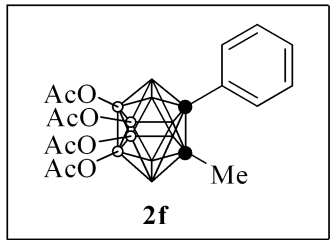

7.73  
7.71  
7.47  
7.46  
7.45  
7.40  
7.39  
7.37  
7.26

2.12  
2.12  
2.08  
— 1.75

— 0.01

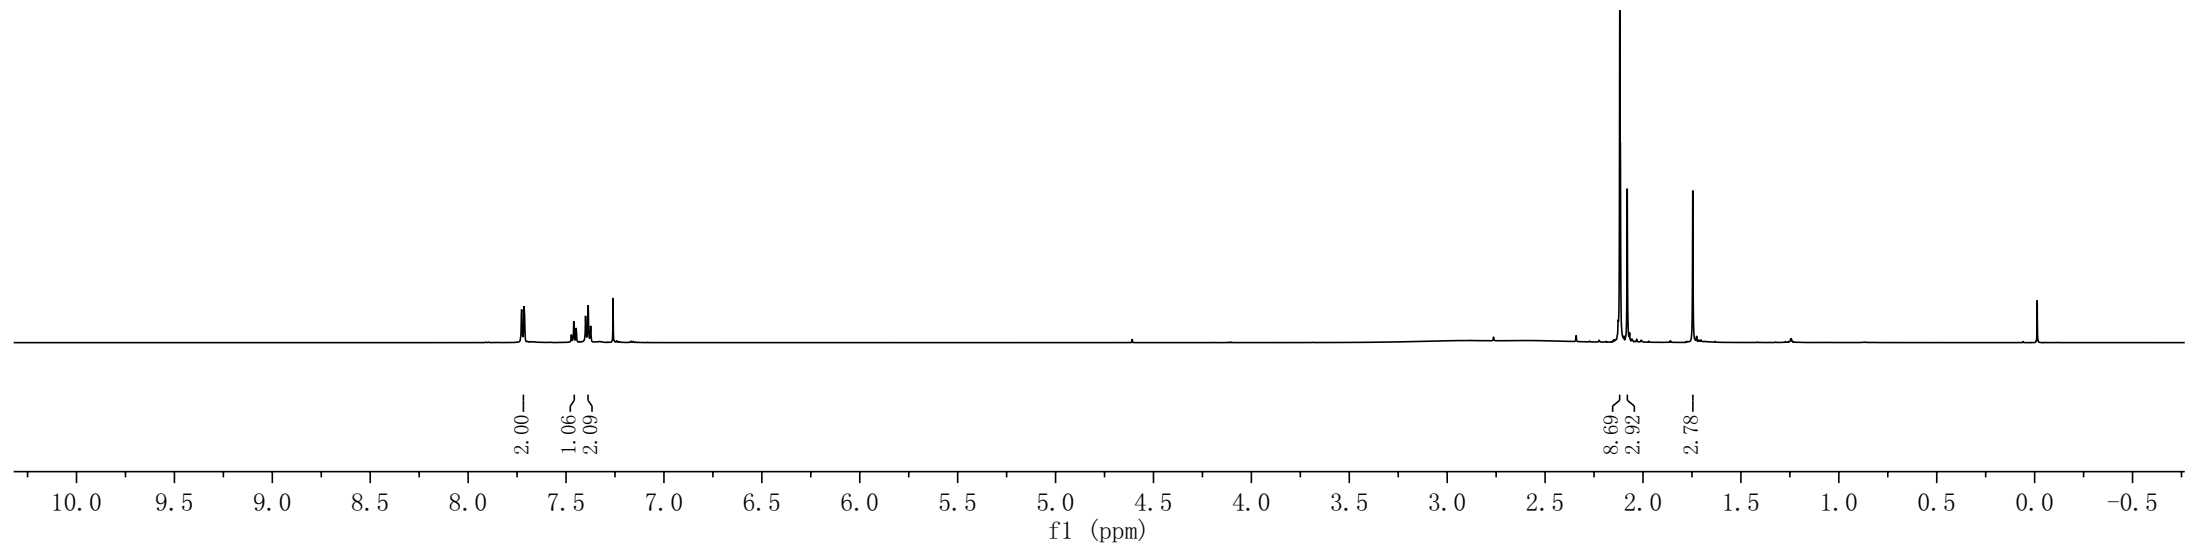

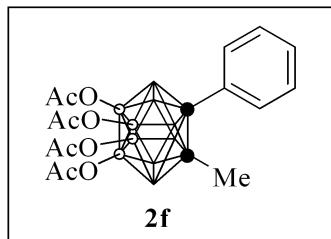

170.12  
169.56  
169.46

131.99  
131.02  
129.03  
128.62

77.21  
77.00  
76.79

59.27  
53.59

22.36  
21.41

-0.05

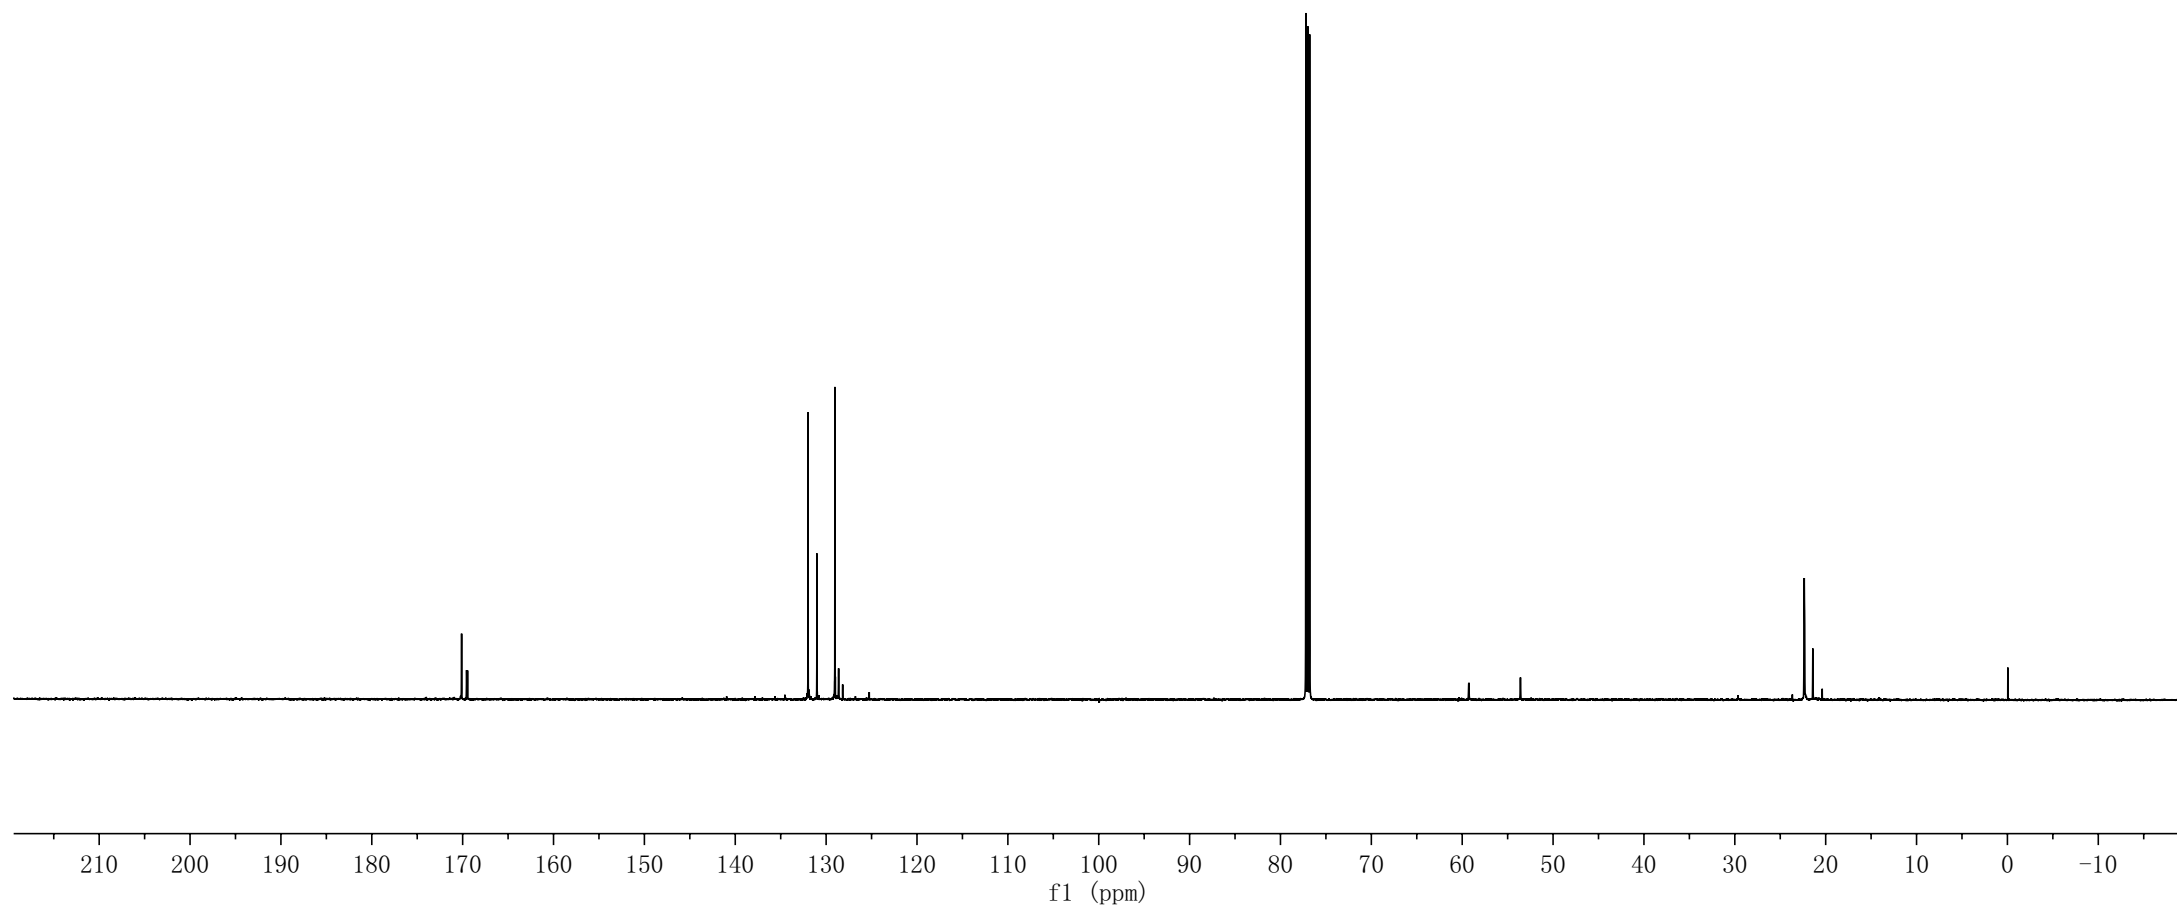

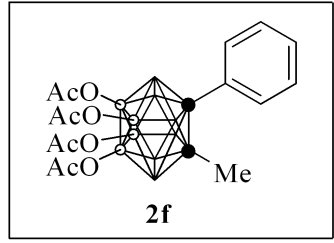

4.50  
3.91

1.82

16.29

21.04

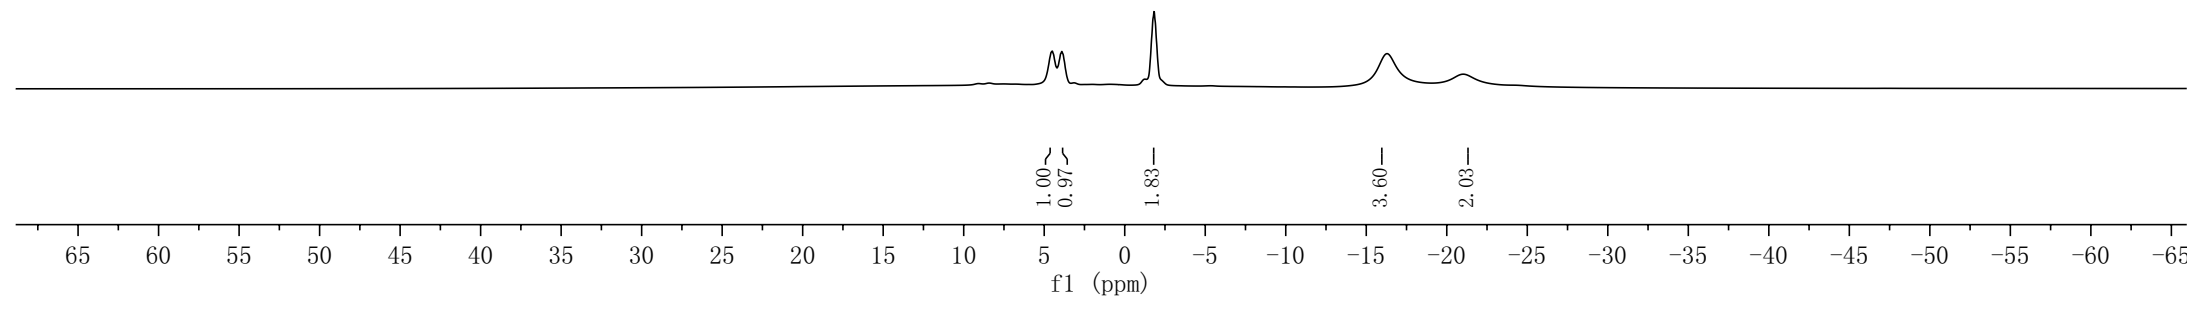

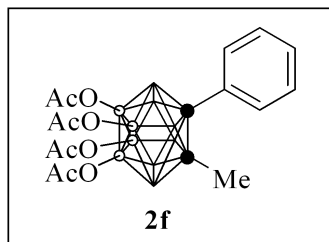

4.50  
3.91

1.82

16.43

20.91

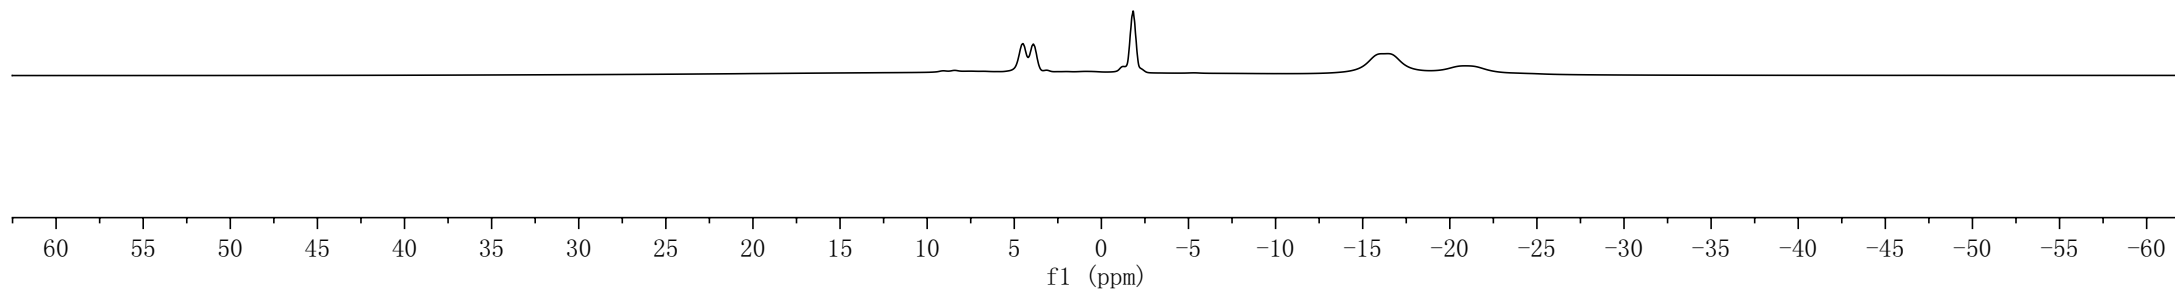

7.81  
7.79  
7.79  
7.46  
7.26  
7.24  
7.24  
6.85  
6.85  
6.84  
6.83

3.12

2.09  
2.07  
2.07

-0.00

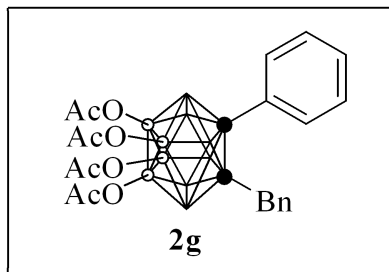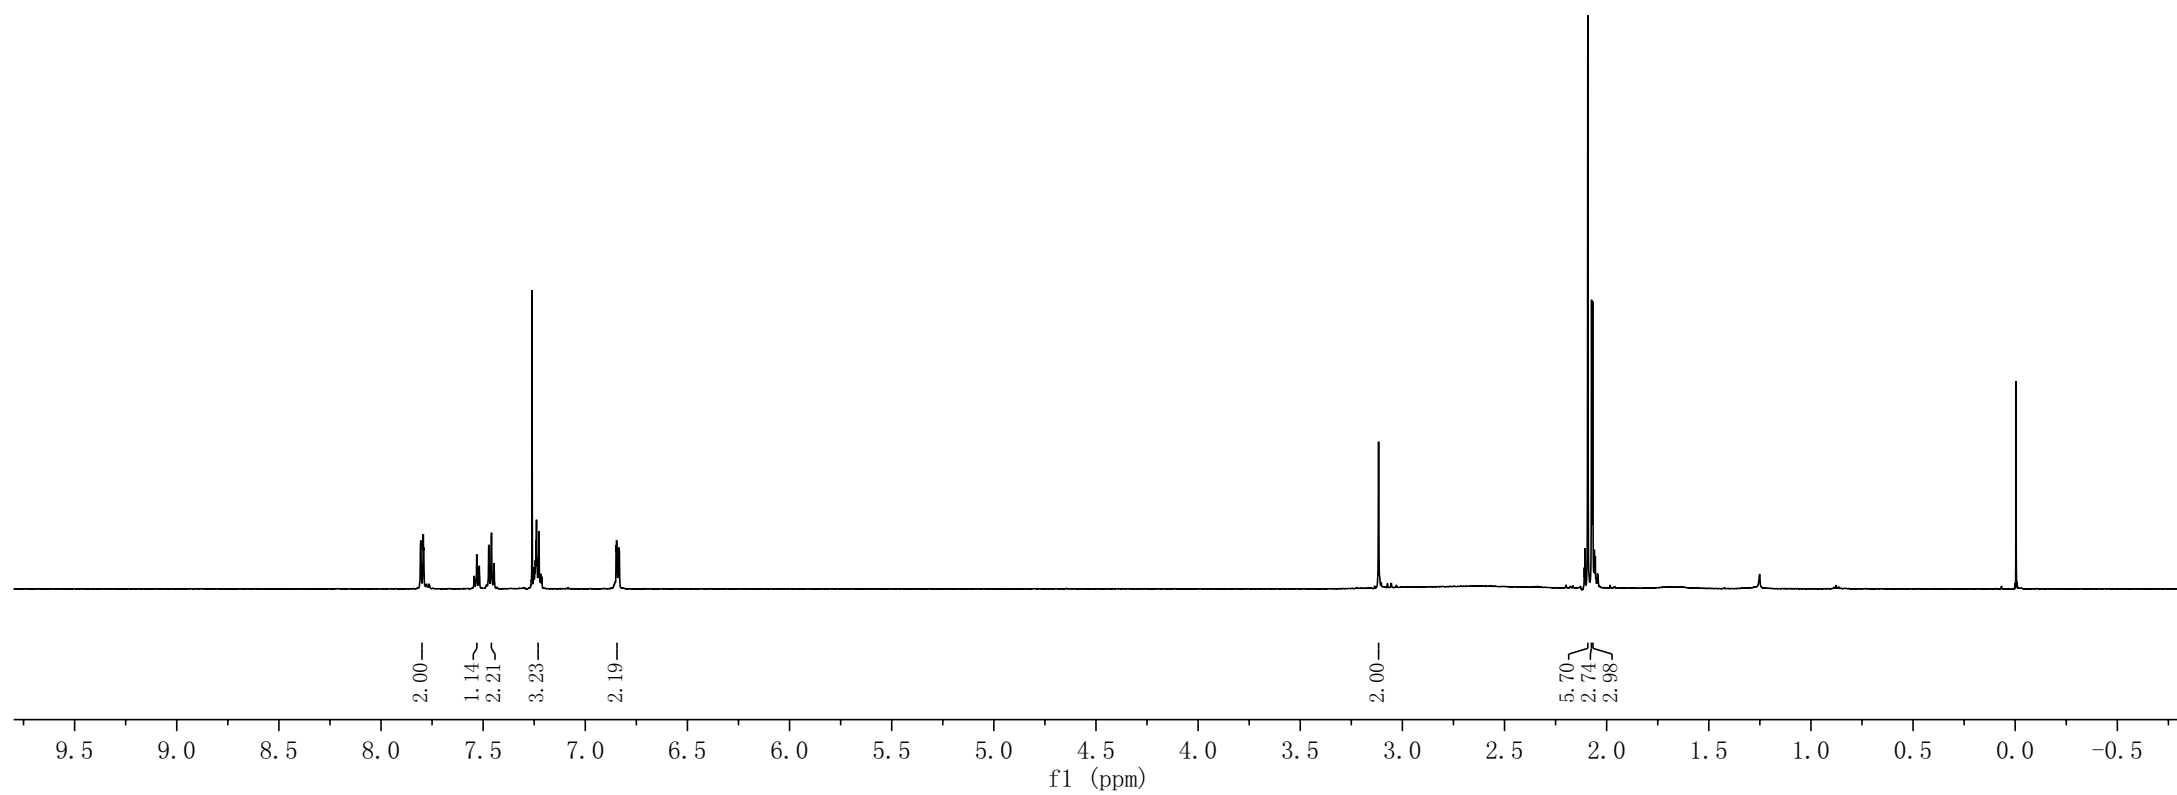

WJ-534-C

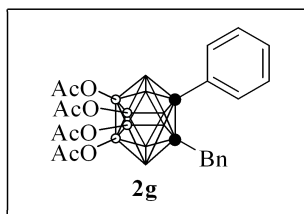

170.06  
169.43

134.60  
132.47  
131.31  
129.92  
129.21  
128.57  
128.16

77.21  
77.00  
76.79

60.75  
58.32

39.13

22.40  
22.32

-0.03

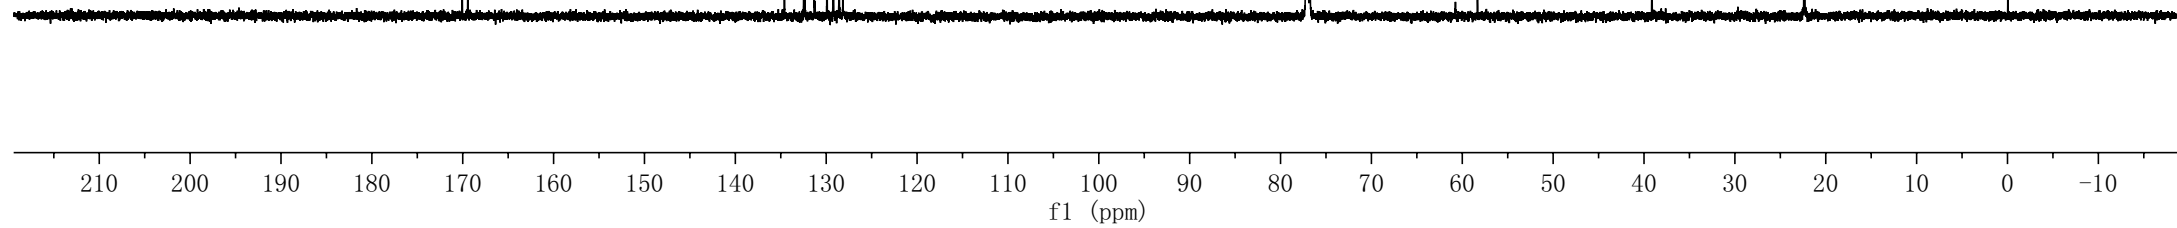

WJ-534-B{H}

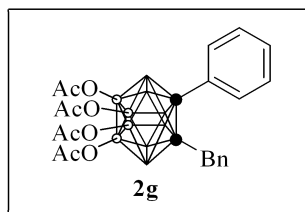

—4.51

—1.59

—17.22

—22.17

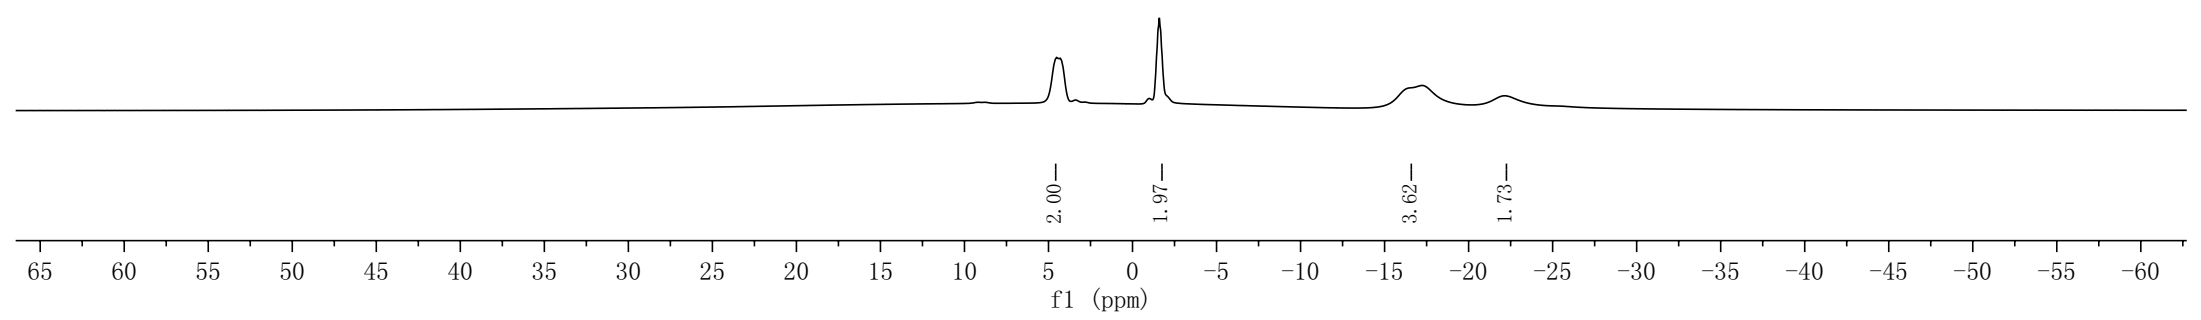

WJ-534-B

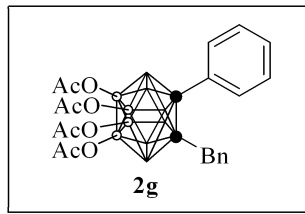

—4.51

—1.59

—15.89  
—16.76  
—17.71

—22.00

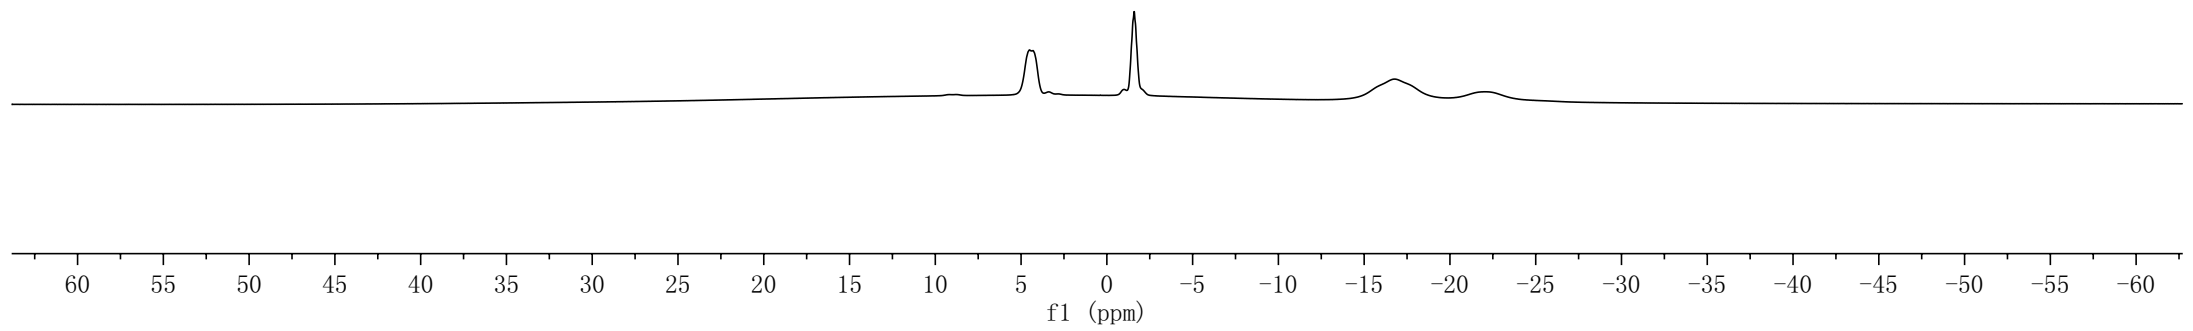



7.71  
7.70  
7.48  
7.46  
7.45  
7.40  
7.39  
7.37  
7.26  
7.26

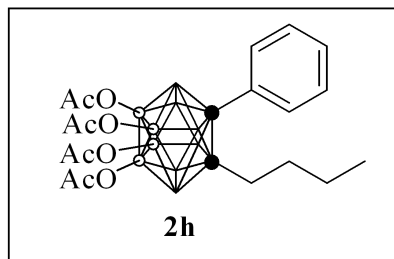

2.12  
2.12  
2.09  
1.81  
1.79  
1.78  
1.41  
1.39  
1.38  
1.10  
1.09  
0.98  
0.72  
0.71  
-0.00  
-0.01

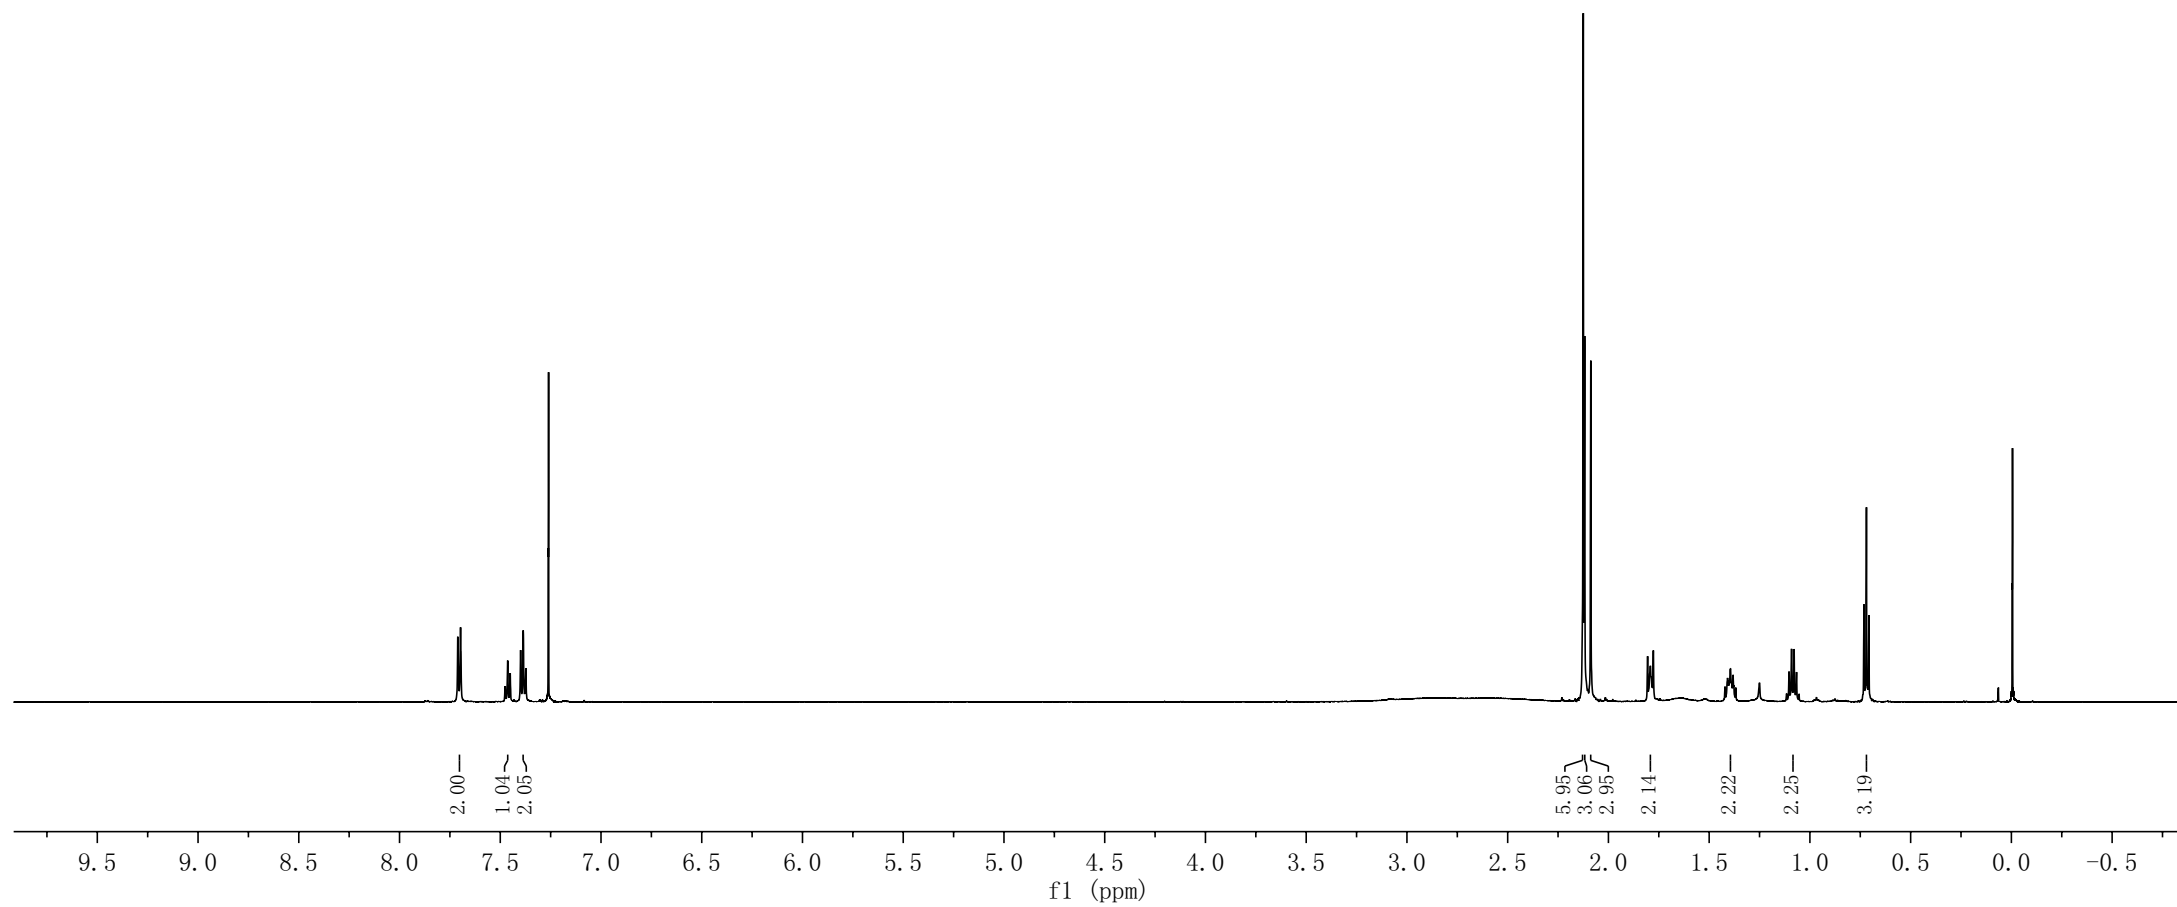

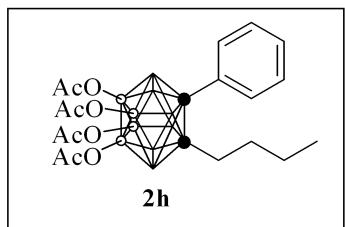

170.15  
169.59  
169.48

132.08  
131.03  
129.01  
128.55

77.21  
77.00  
76.79

60.69  
58.58

32.88  
31.77

22.42  
22.00

13.41

-0.03

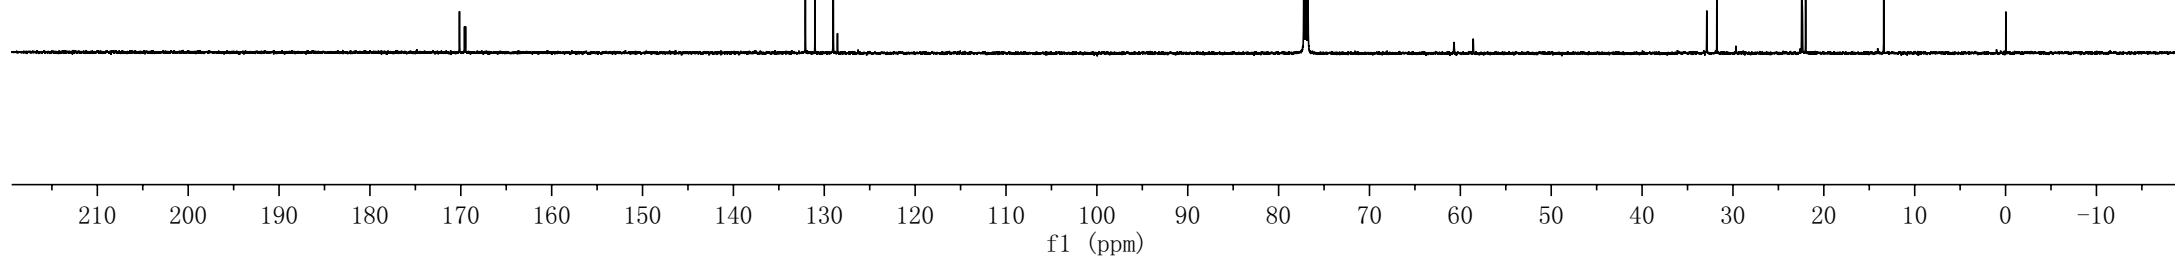

WJ-533-B{H}

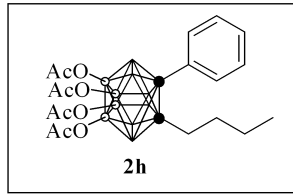

—4.26

—1.78

—17.40

—21.76

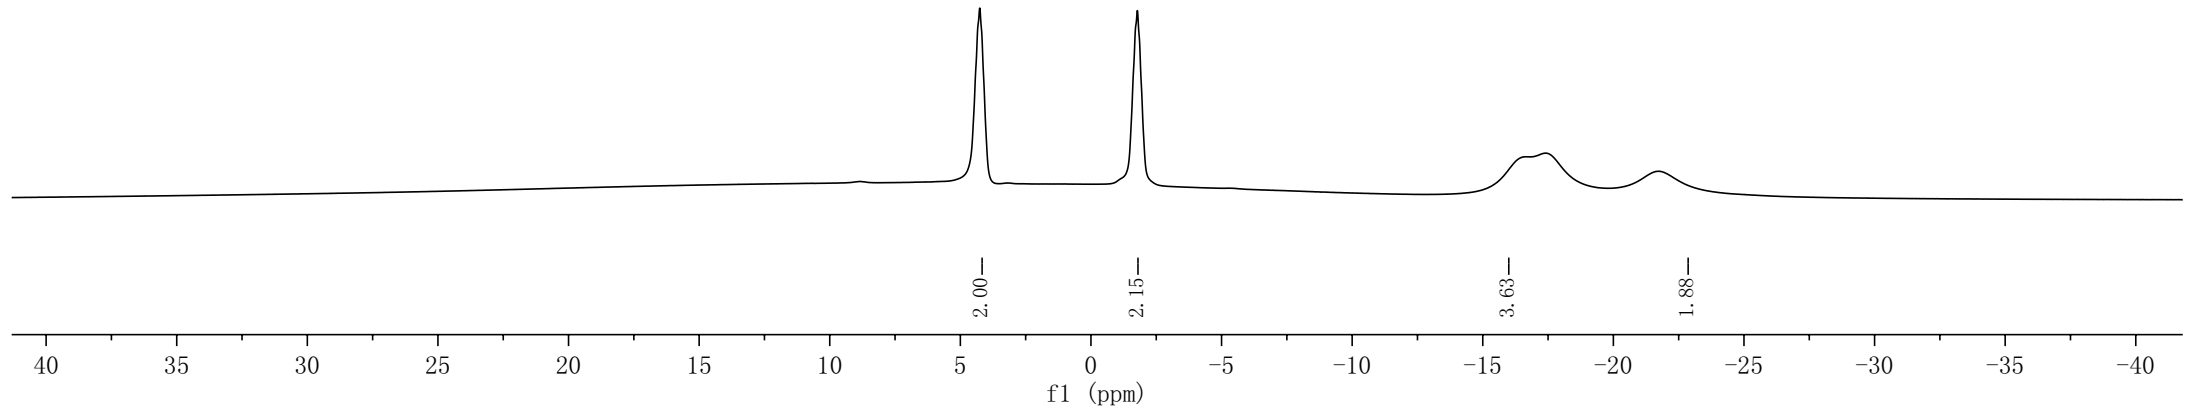

WJ-533-B

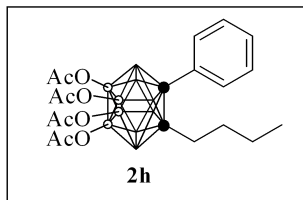

—4.26

—1.78

—15.91

—16.92

—17.67

—21.50

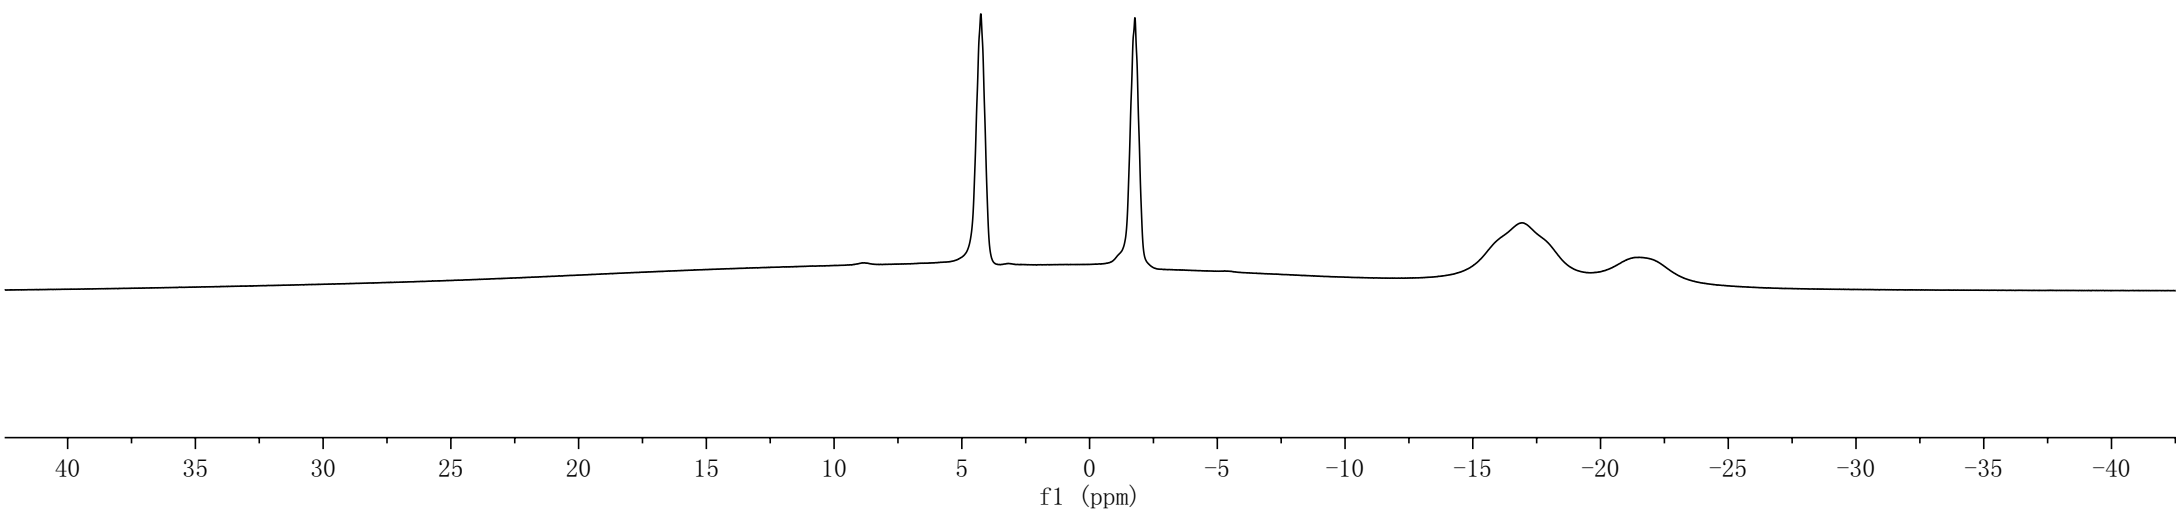

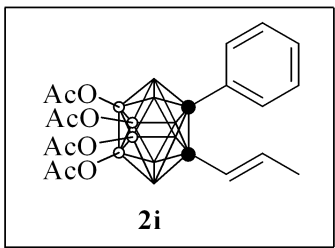

7.66  
7.65  
7.44  
7.42  
7.41  
7.35  
7.34  
7.33  
7.26

6.18  
6.17  
6.16  
6.15  
6.14  
6.12

5.27  
5.26  
5.24  
5.24

2.13  
2.12  
2.09

1.54  
1.53  
1.53  
1.52

-0.01

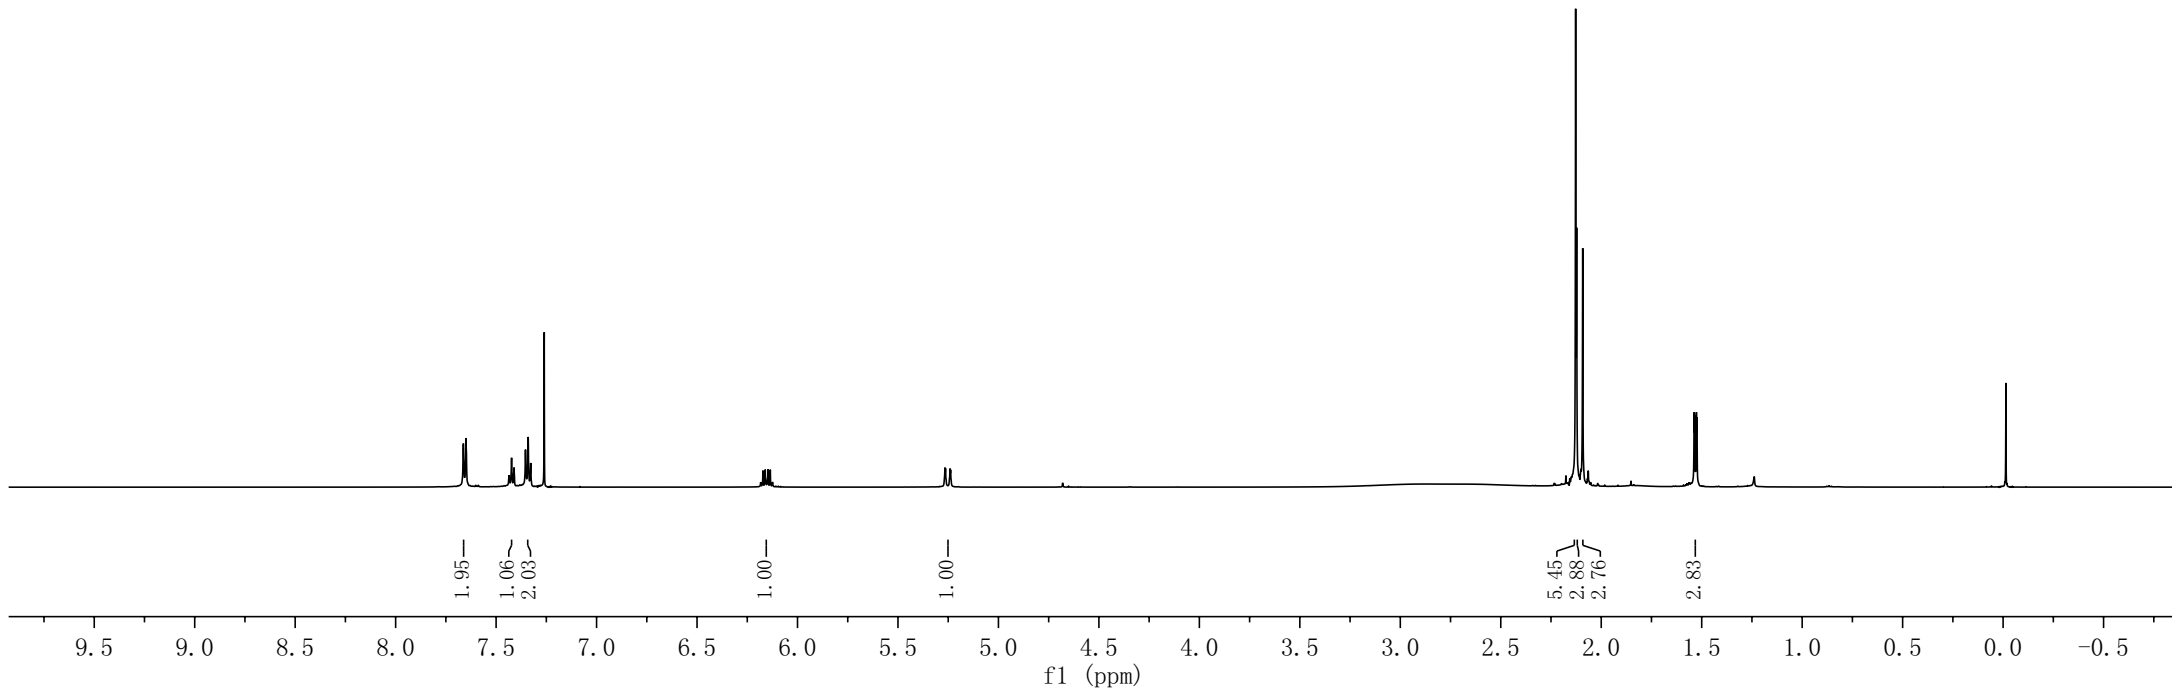

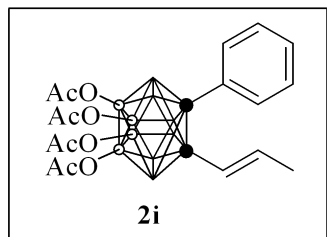170.13  
169.56  
169.48

— 139.63

131.90  
130.76128.70  
128.60

— 120.84

77.21  
77.00  
76.7959.81  
57.6822.43  
22.37  
17.75

— 0.03

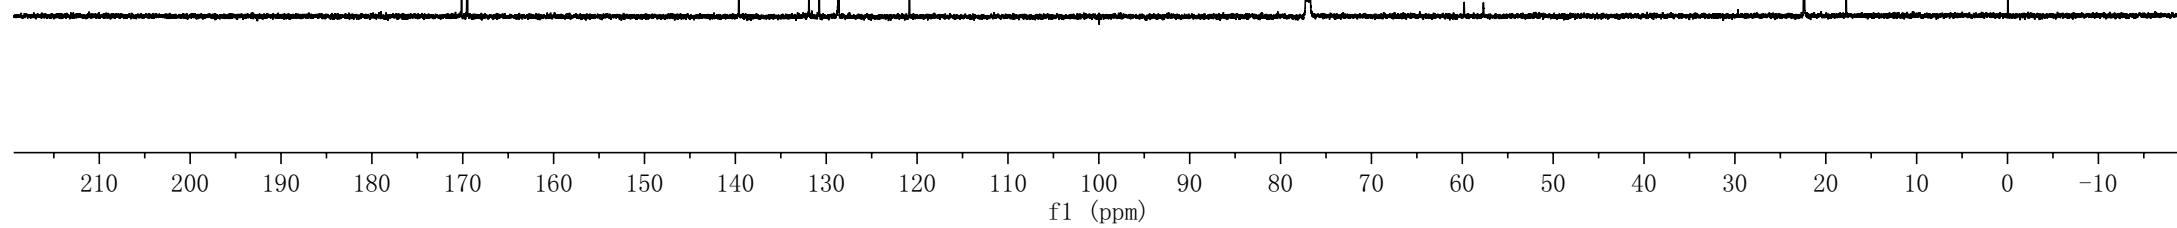

WJ-636-B{H}

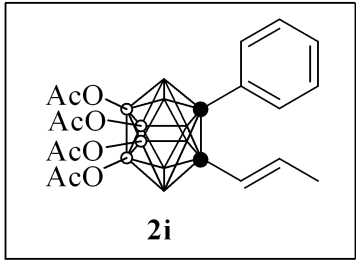

—4.52

—1.95

—16.61

—21.53

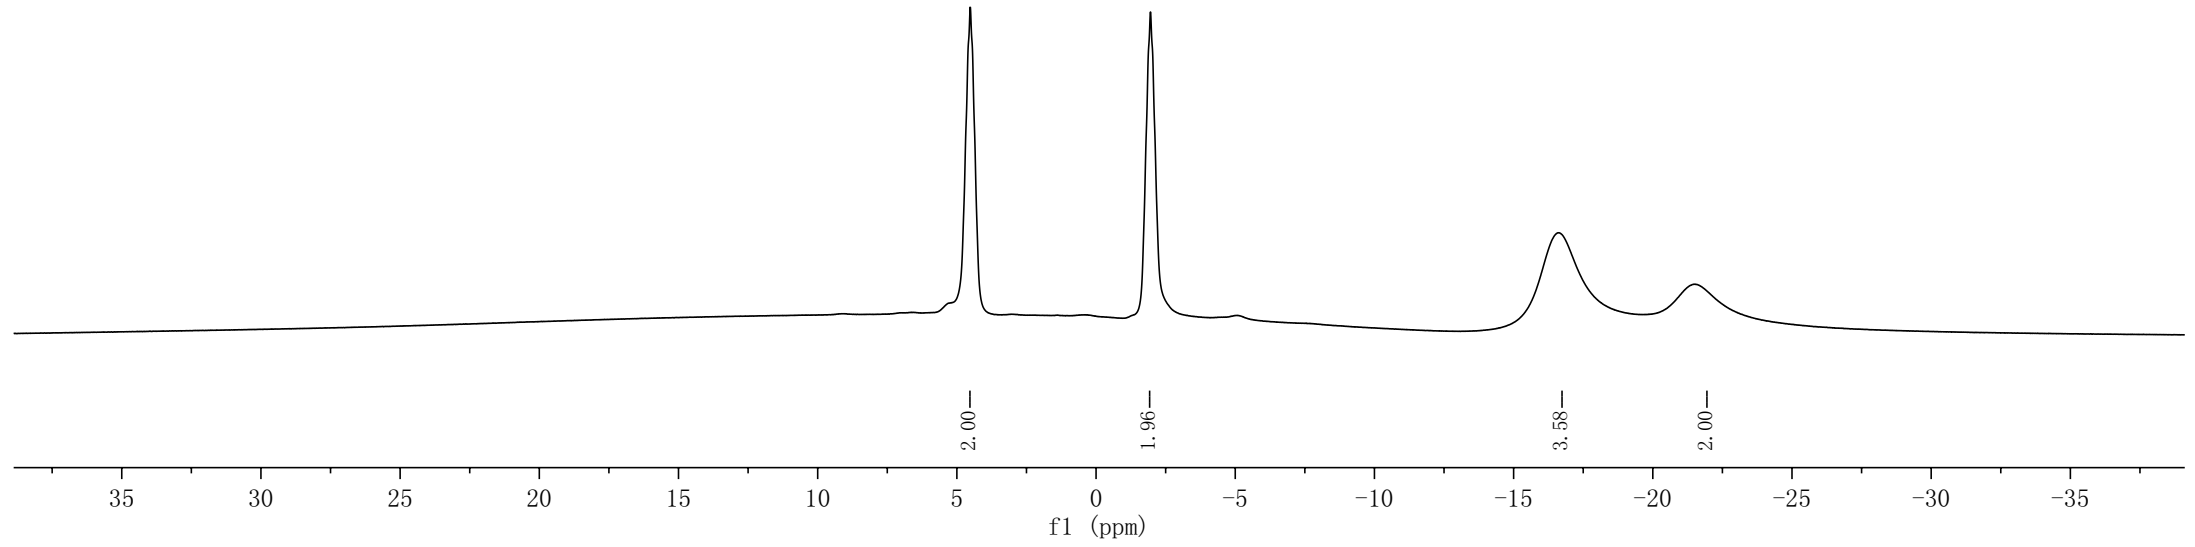

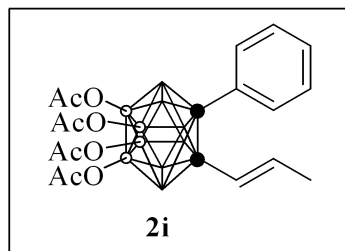

—4.51

—1.96

—16.69

—21.48

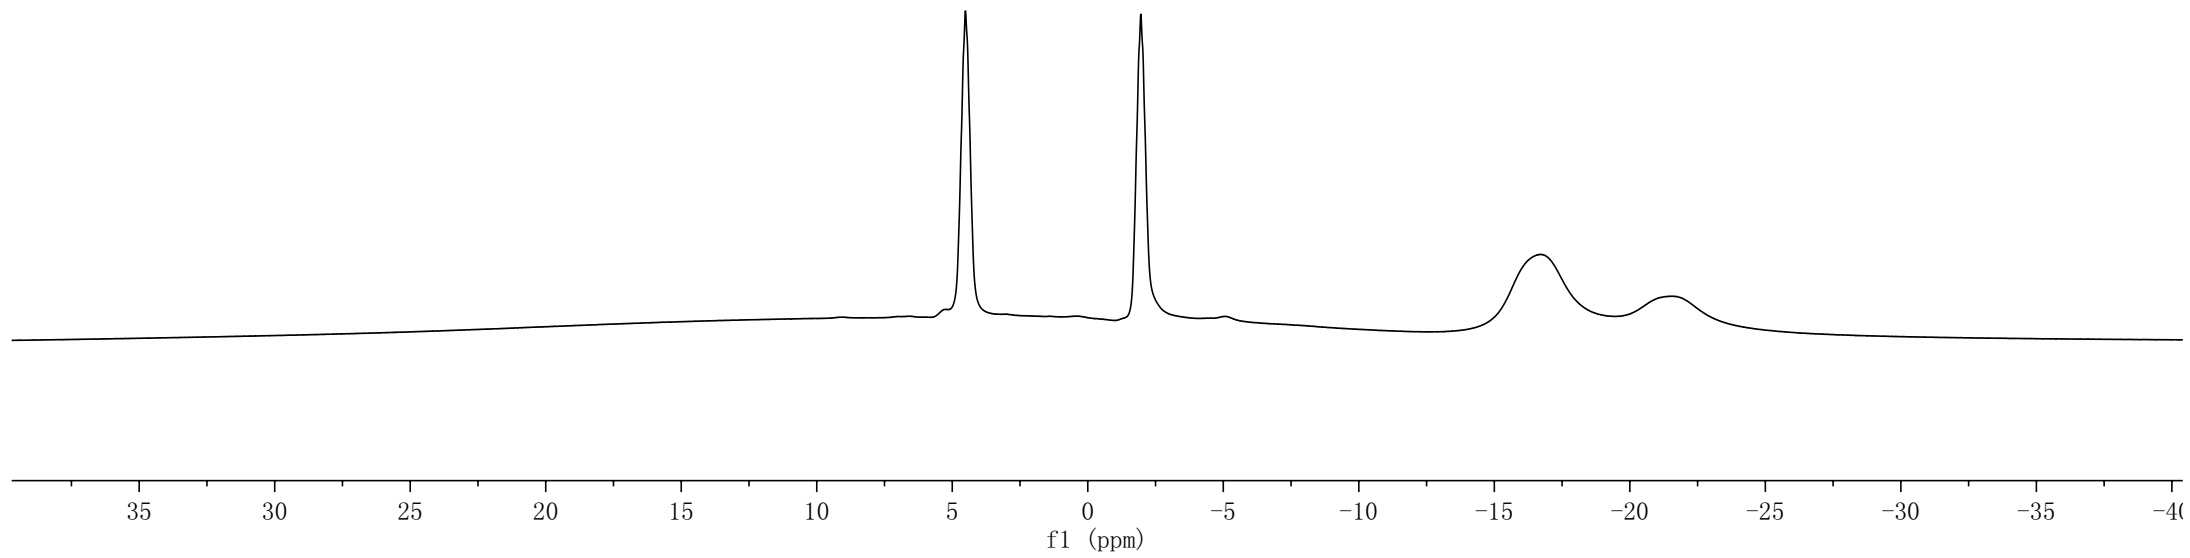



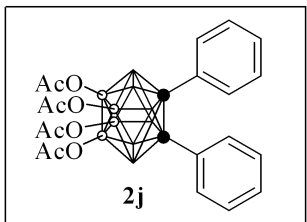

7.51  
7.51  
7.50  
7.49  
7.26  
7.25  
7.24  
7.23  
7.22  
7.22  
7.14  
7.13  
7.13  
7.12  
7.12

2.16  
2.12

-0.01

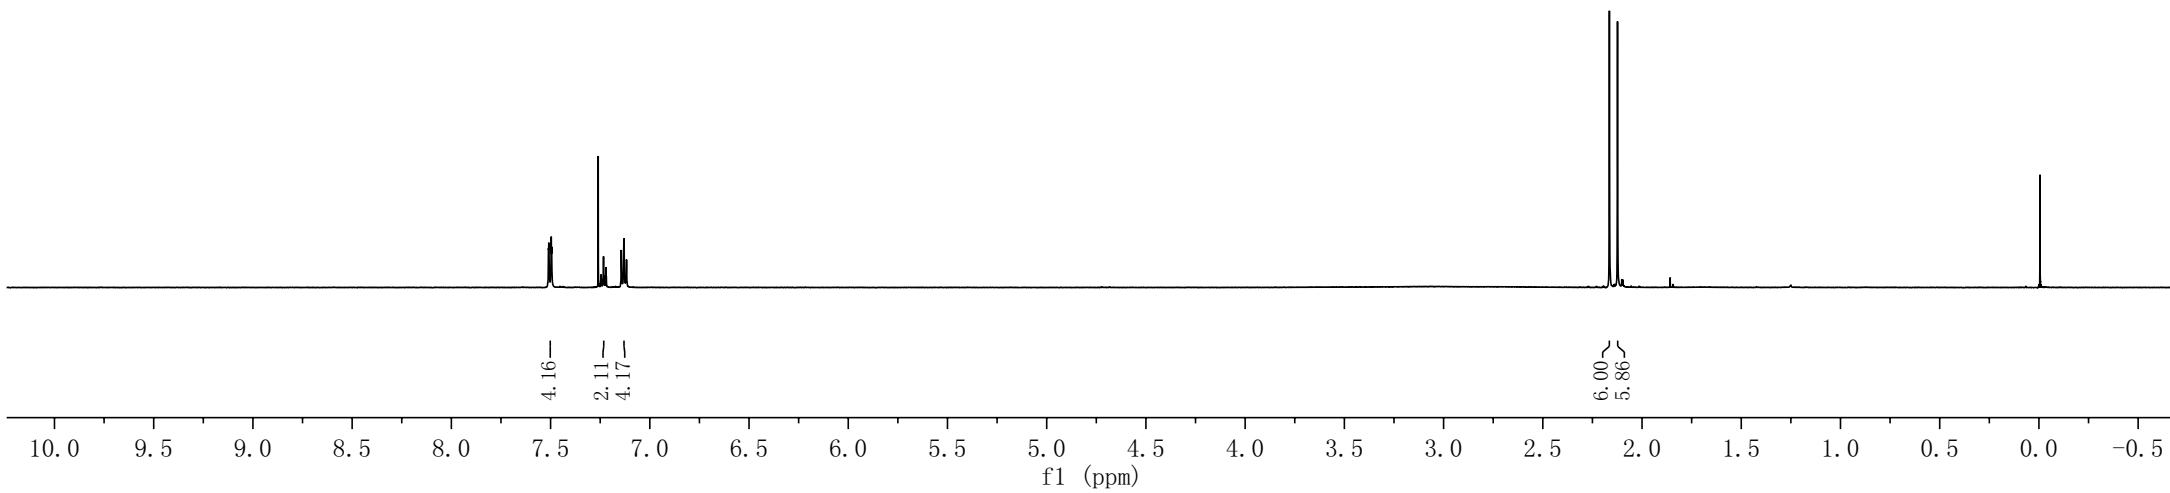

WJ-580-C

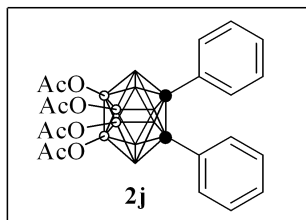

170.19  
169.49

131.48  
130.58  
128.38  
128.29

77.21  
77.00  
76.79

61.91

22.50  
22.37

-0.03

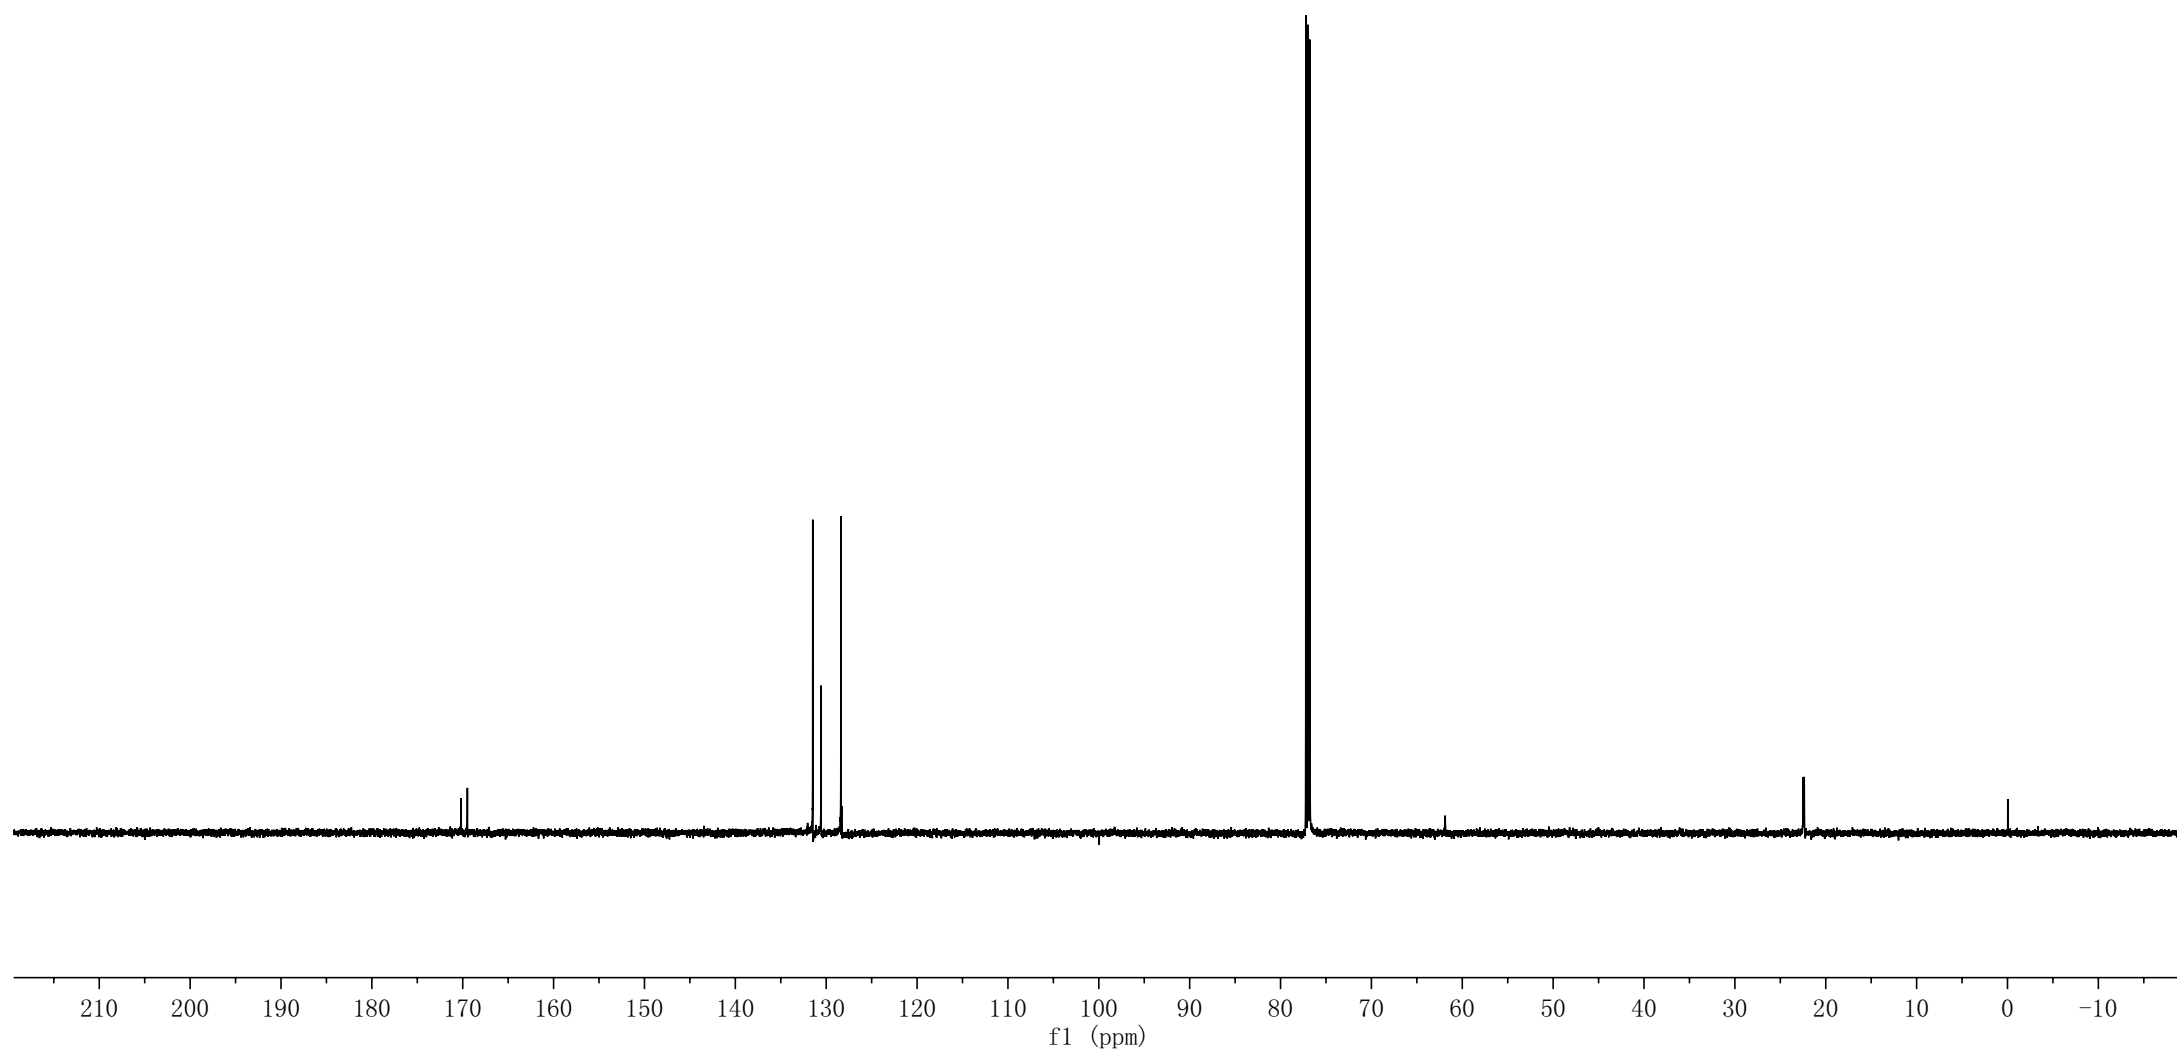

WJ-580-B{H}

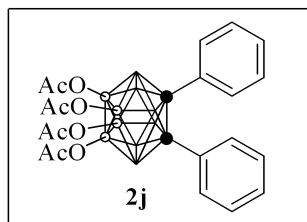

—5.25

—1.87

—15.92

—21.89

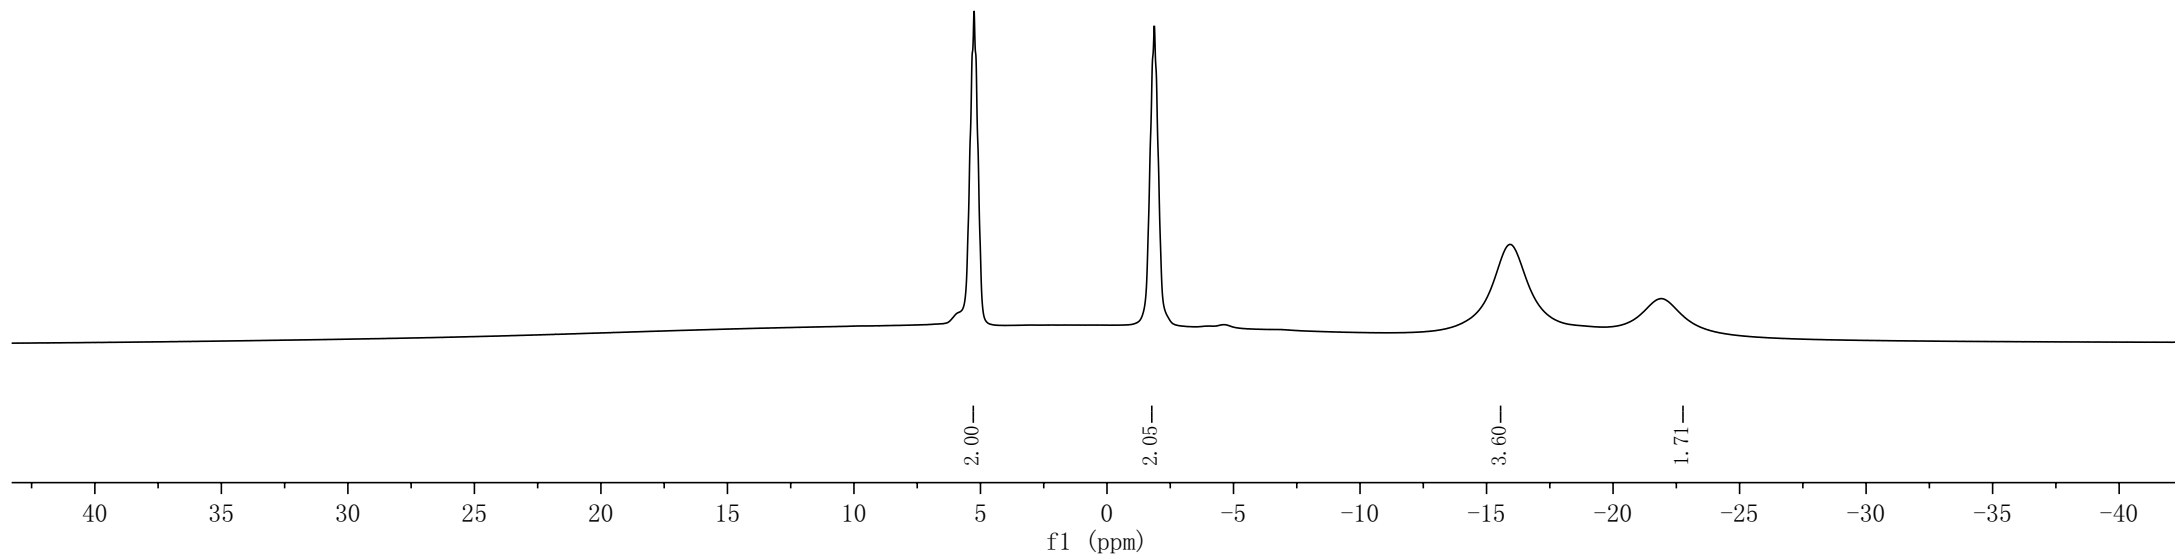

WJ-580-B

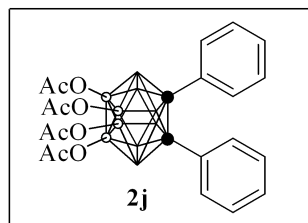

— 5.25

— 1.87

— 16.13

— 22.09

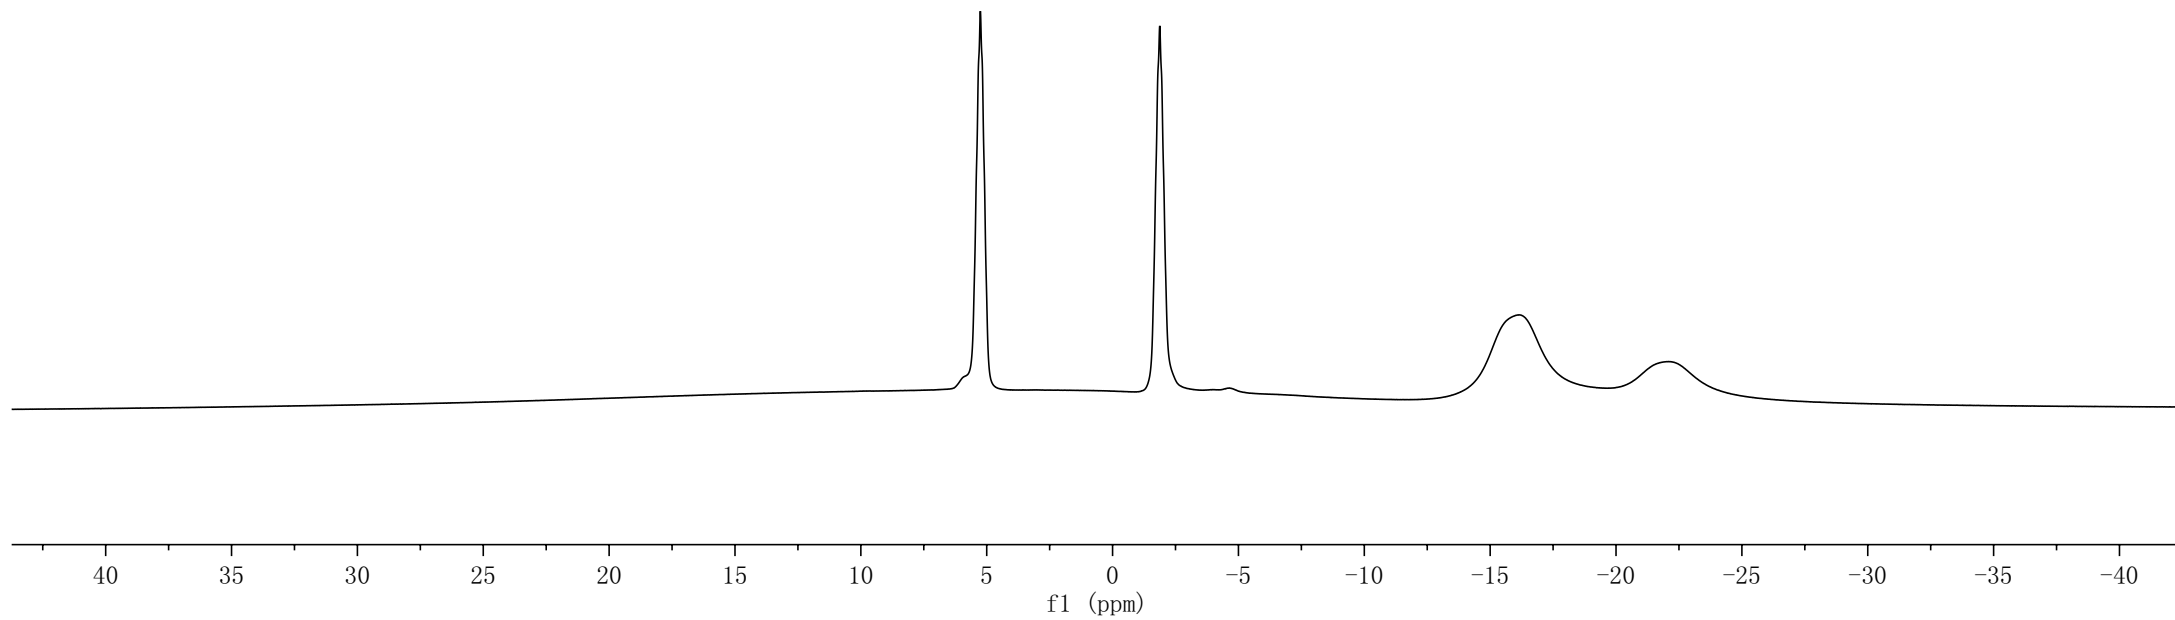

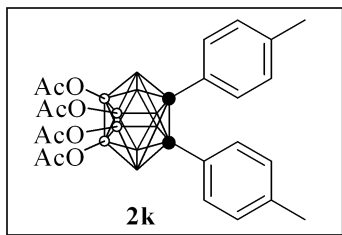

7.39  
7.37  
7.26

6.94  
6.93

2.22  
2.16  
2.12

-0.00

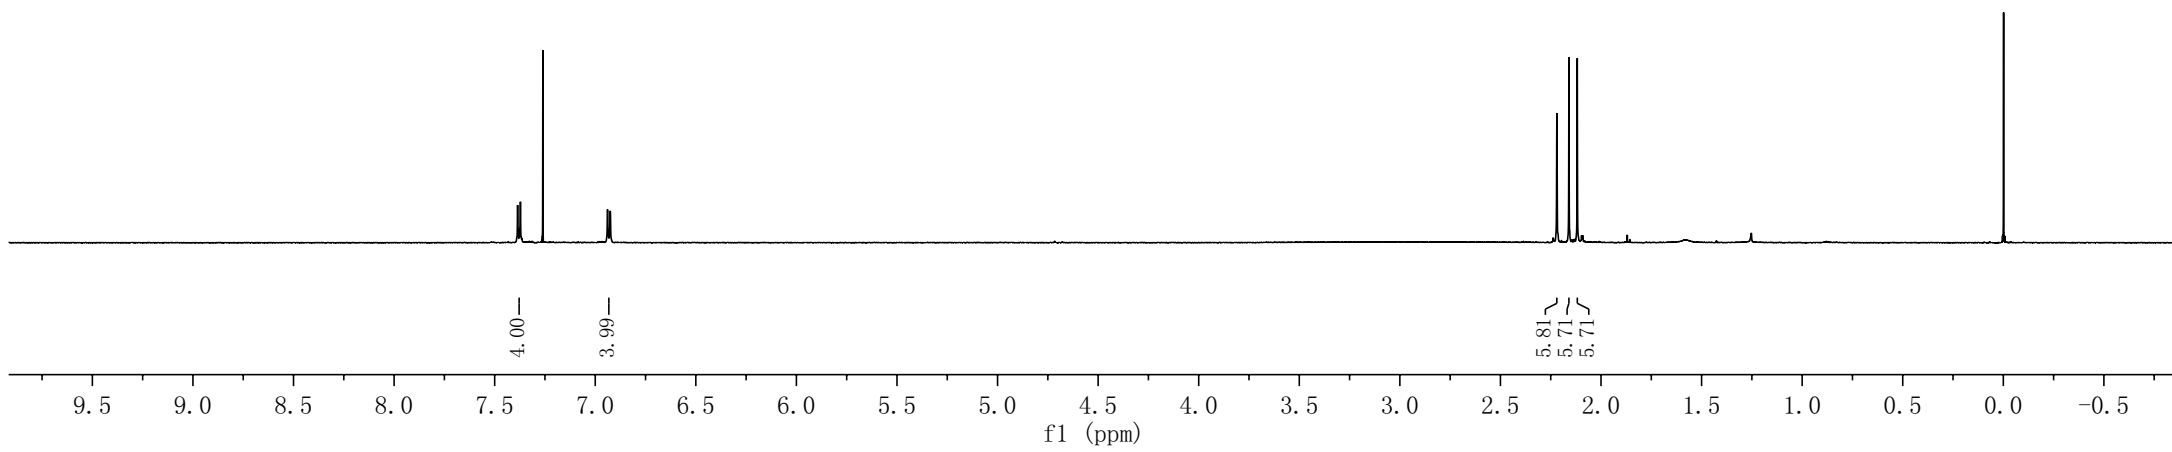

WJ-655-C

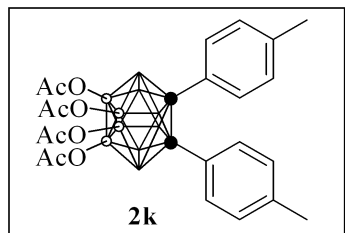

170.25  
169.52

140.90

131.40  
129.09  
125.58

77.21  
77.00  
76.79

62.28

22.52  
22.40  
20.99

-0.02

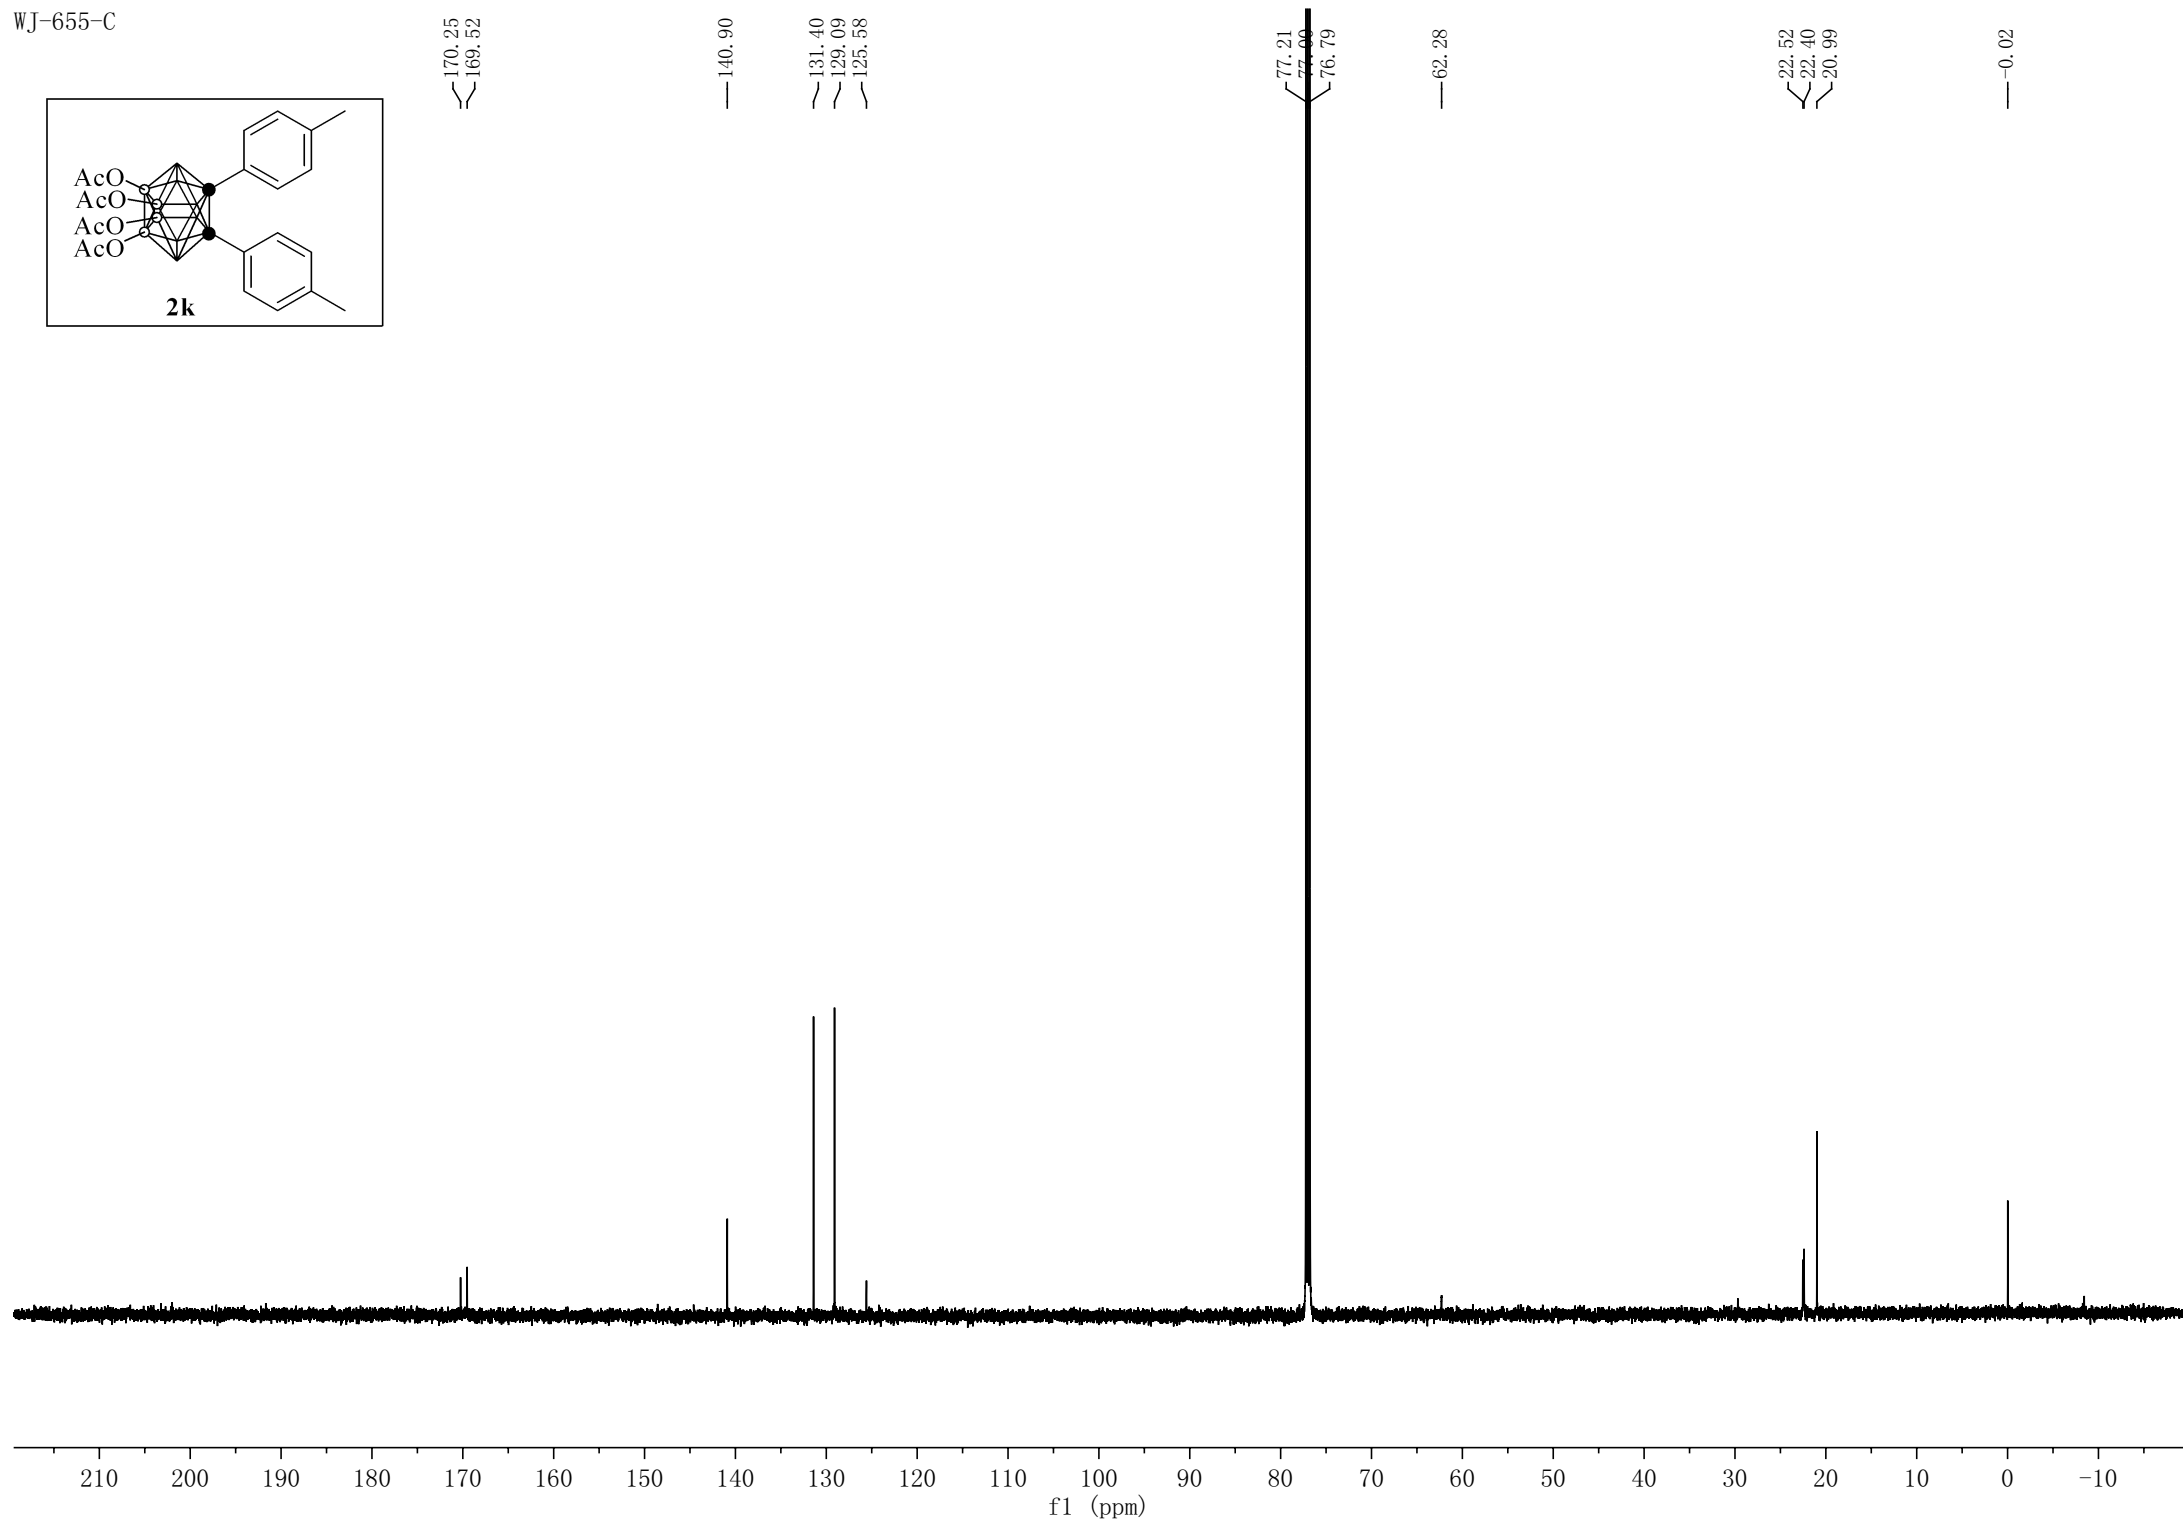

WJ-655-B{H}

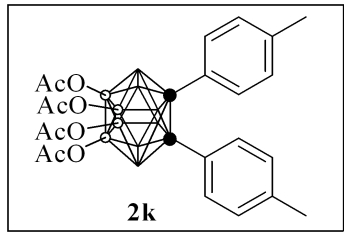

—5.07

—2.03

—15.94

—21.97

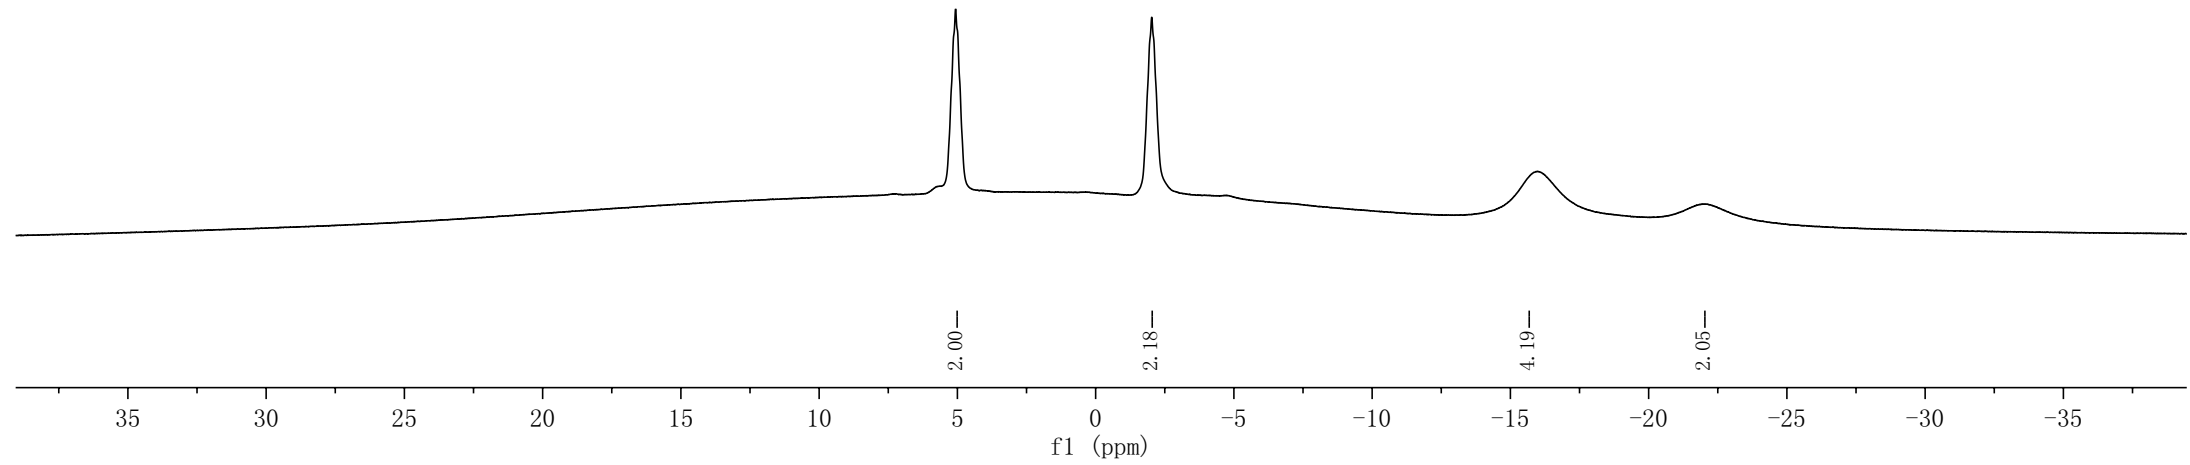

WJ-655-B

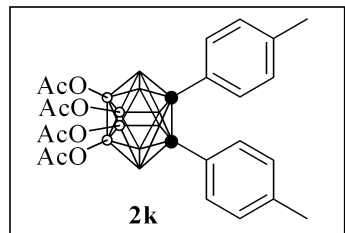

—5.07

—2.03

—16.21

—22.17

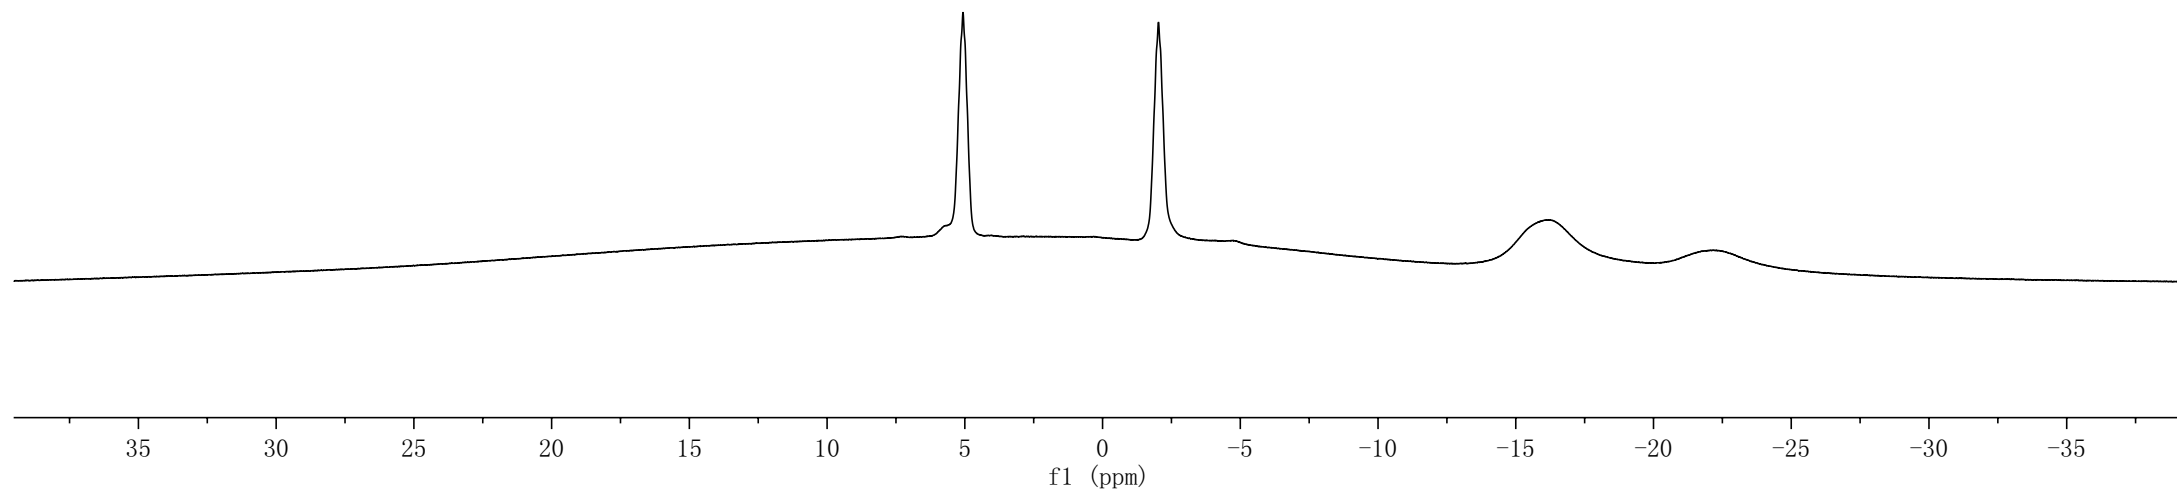



WJ-592-H

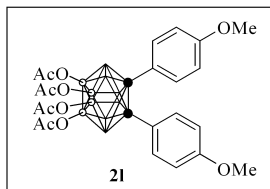

7.42  
7.41  
7.26

6.64  
6.62

3.71

2.15  
2.12

0.01

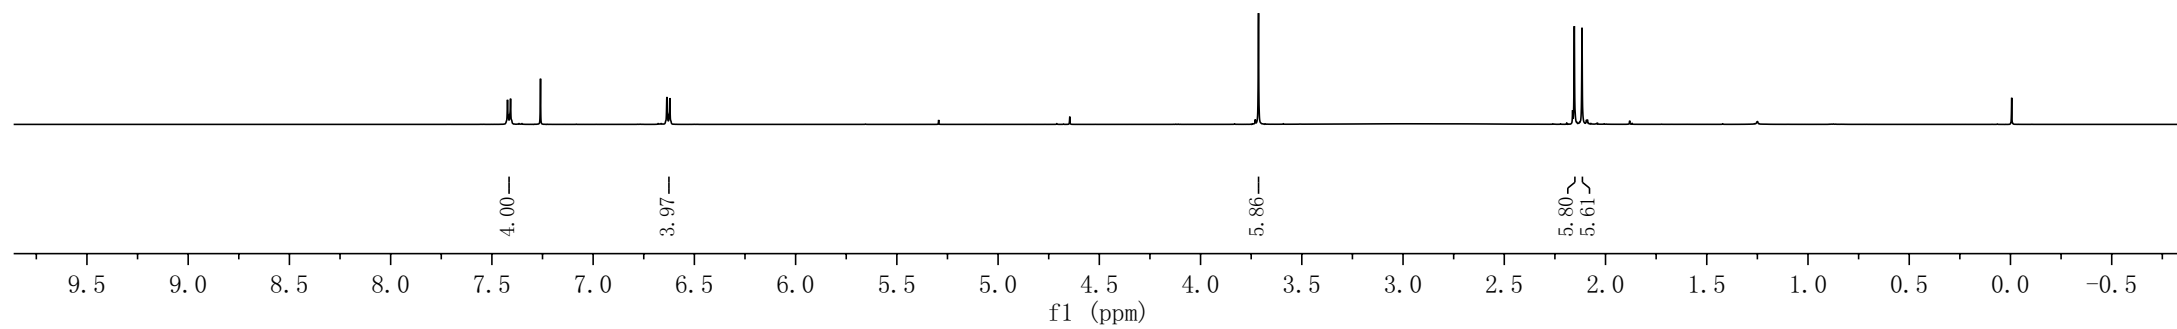

WJ-592-C

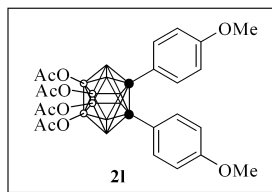

170.29  
169.59

161.13

133.06

120.52

113.64

77.21  
77.00  
76.79

62.86  
60.16

55.28

22.50  
22.39

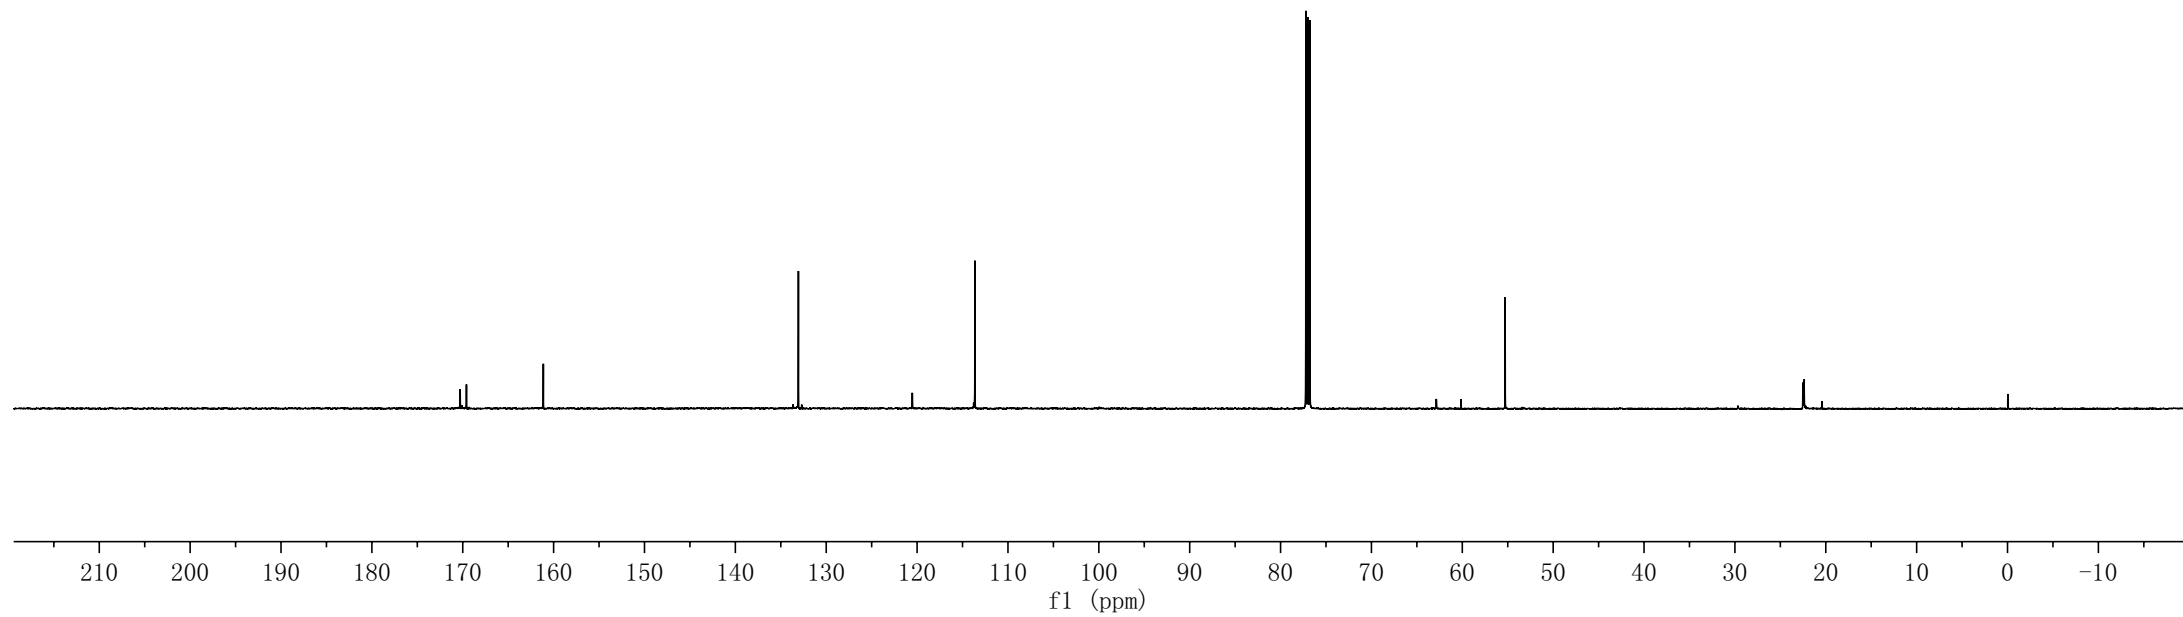

WJ-592-B{H}

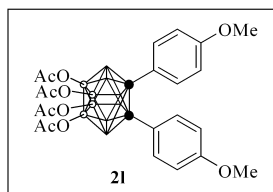

—4.96

—2.17

—15.91

—21.83

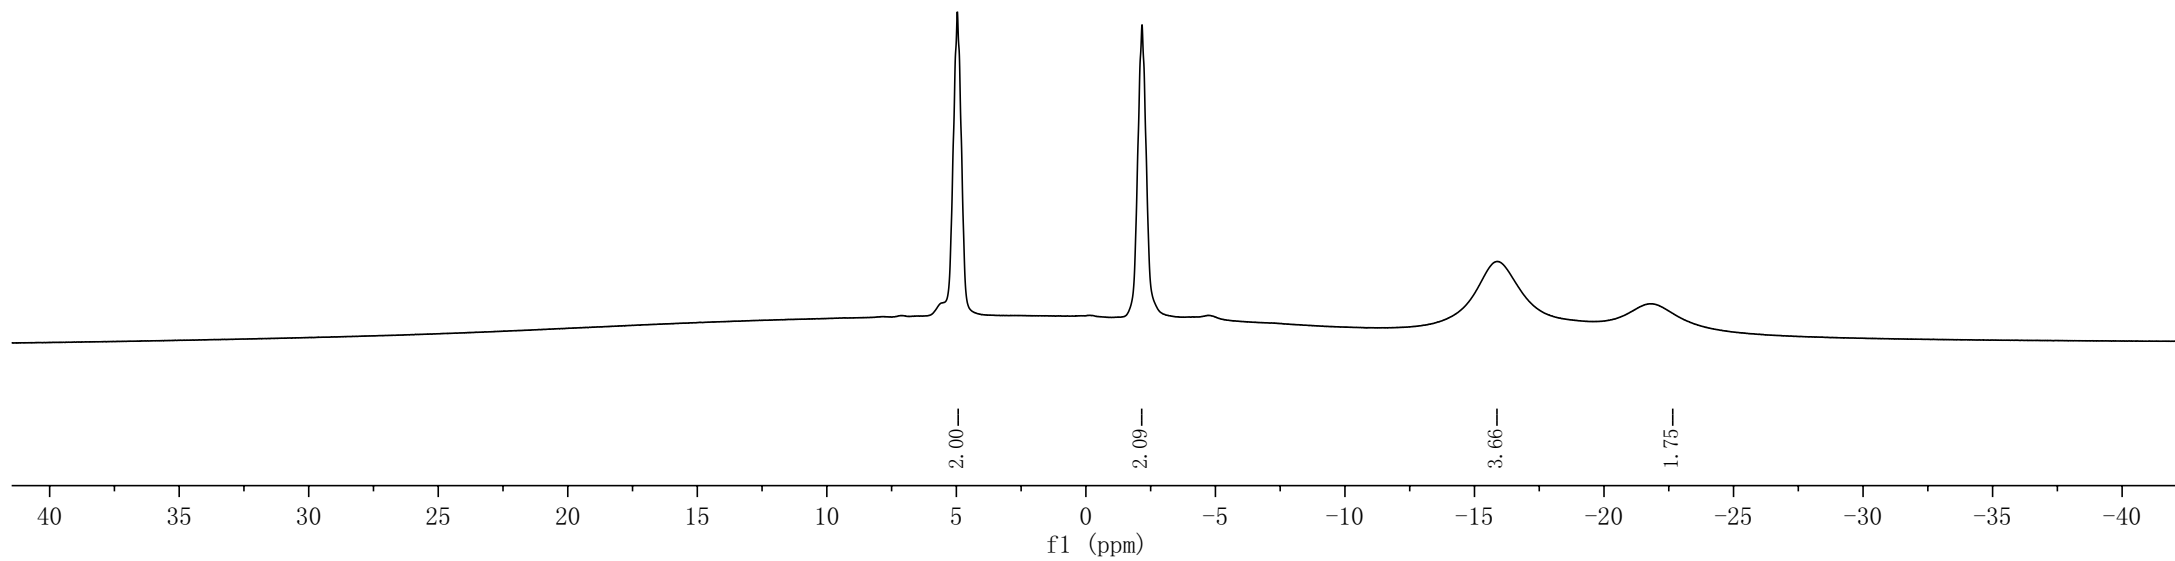

WJ-592-B

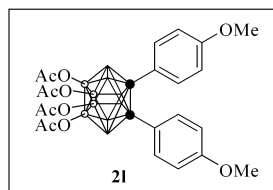

—4.96

—-2.17

—-15.94

—-21.82

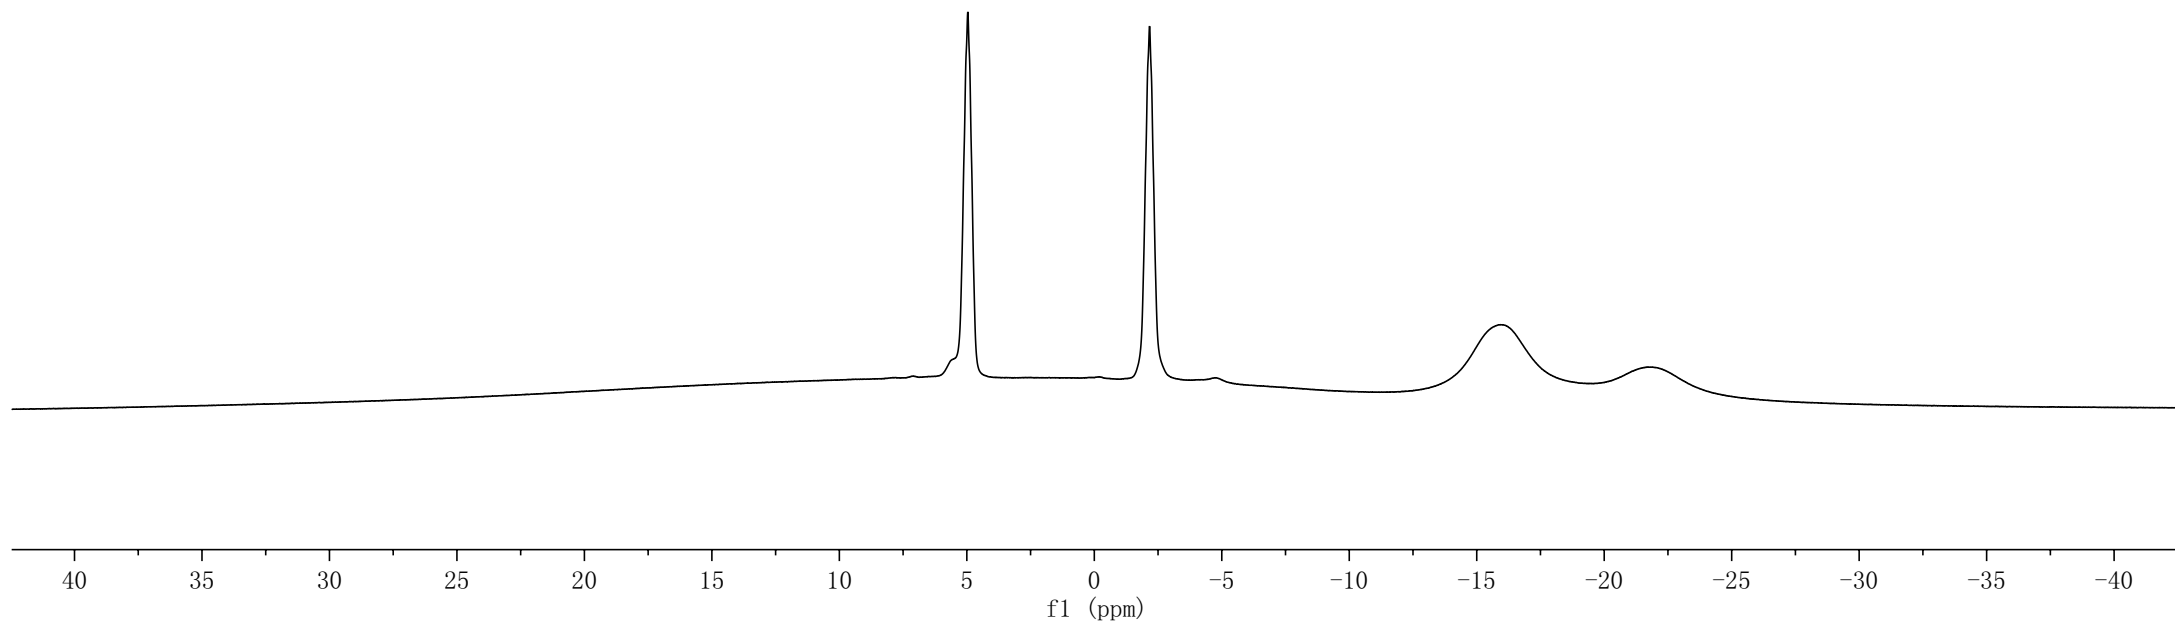

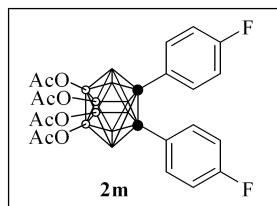

7.52  
7.51  
7.51  
7.50  
7.50  
7.26

6.87  
6.86  
6.84

2.17  
2.13

-0.00

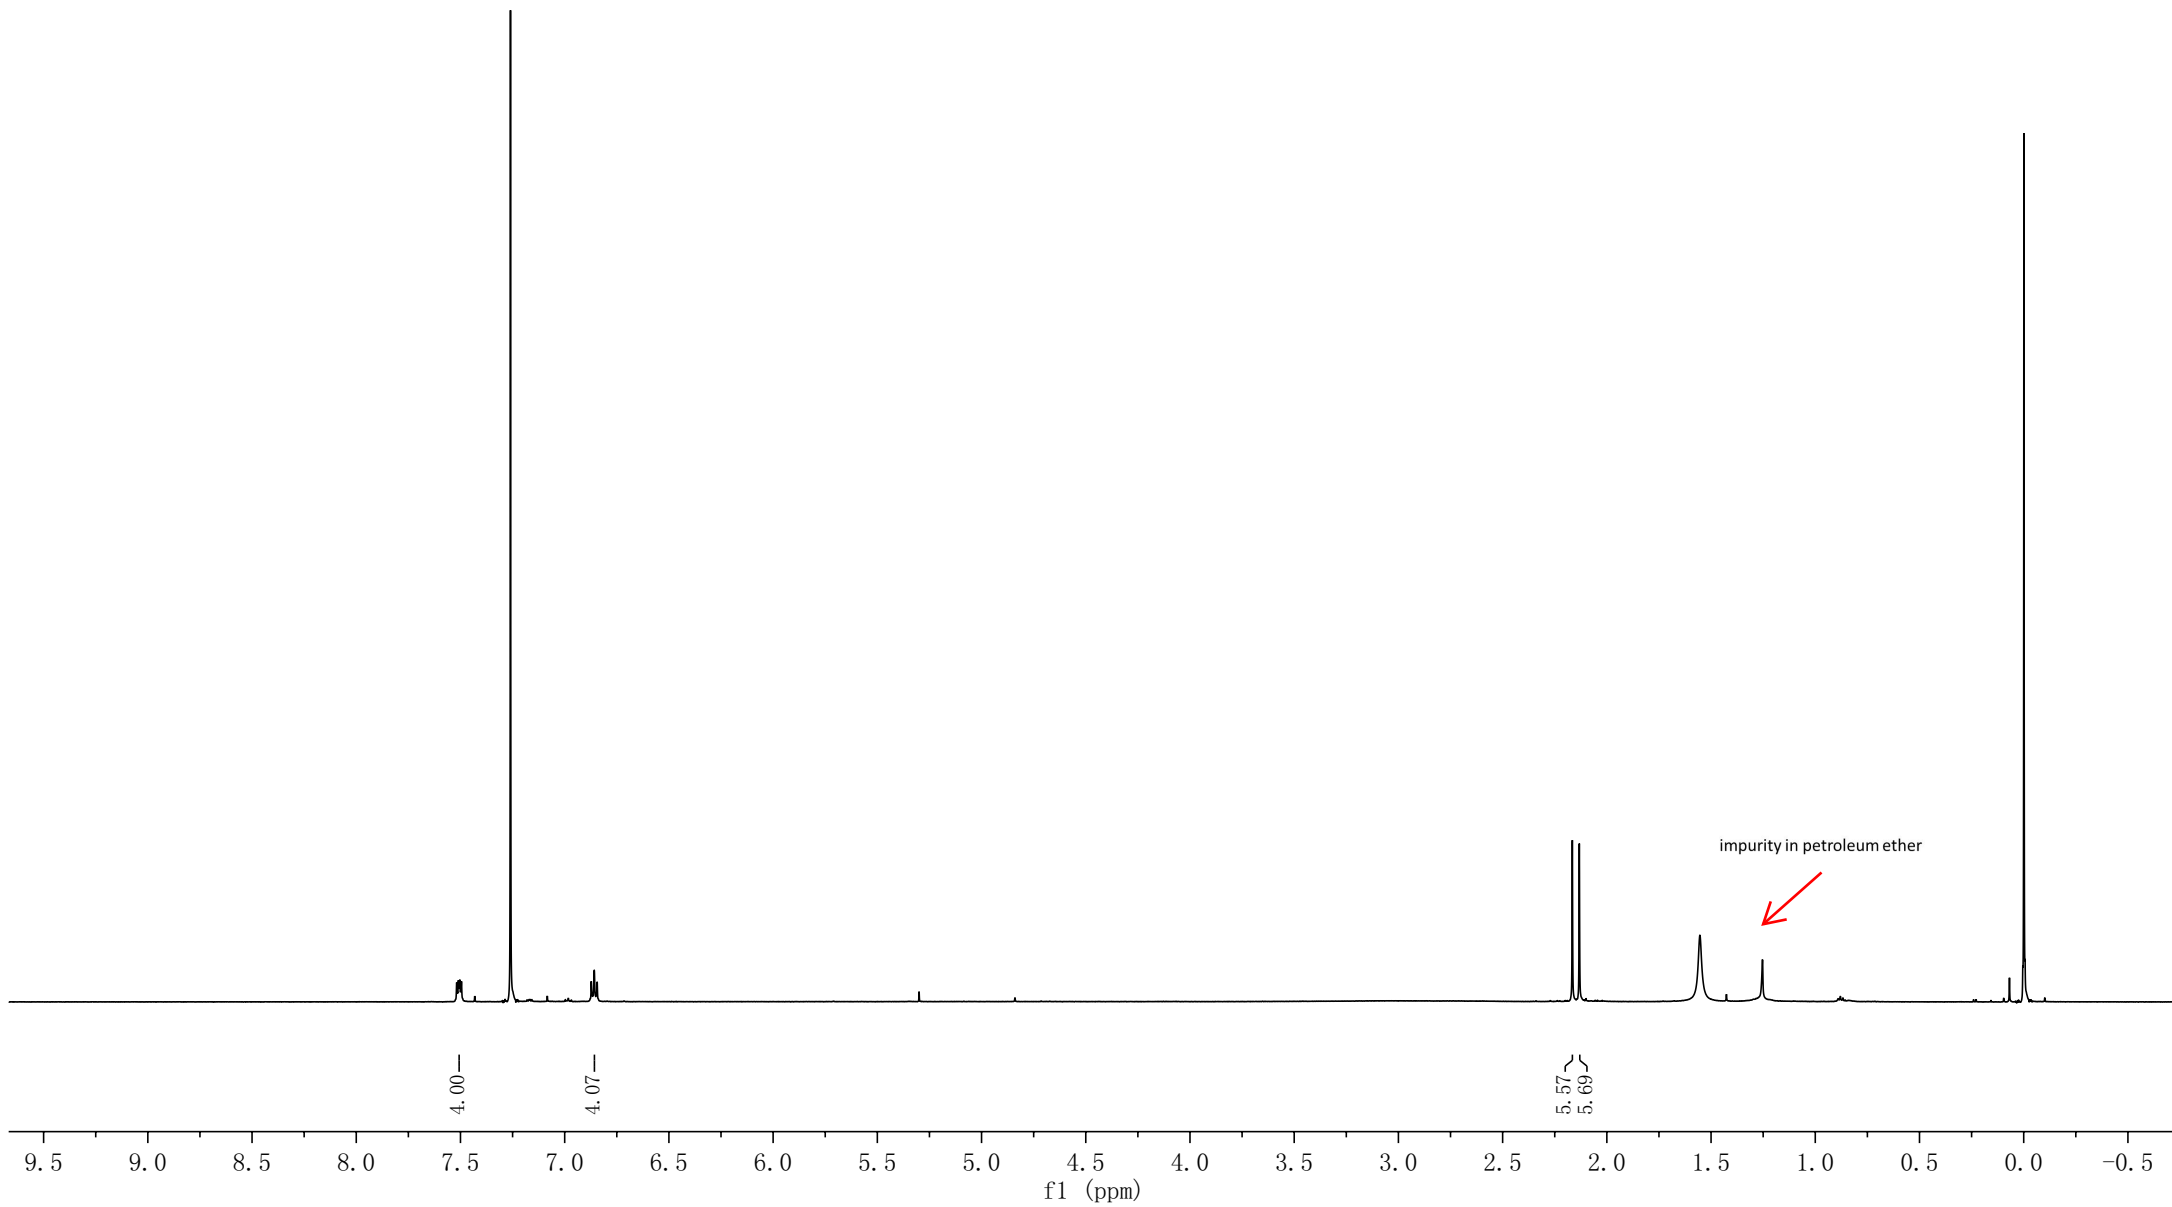

WJ-582-C

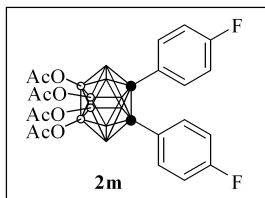

170.22  
169.51  
164.73  
163.05

133.66  
133.60

124.29

115.80  
115.65

77.21  
77.00  
76.79

61.23

22.47  
22.35

-0.03

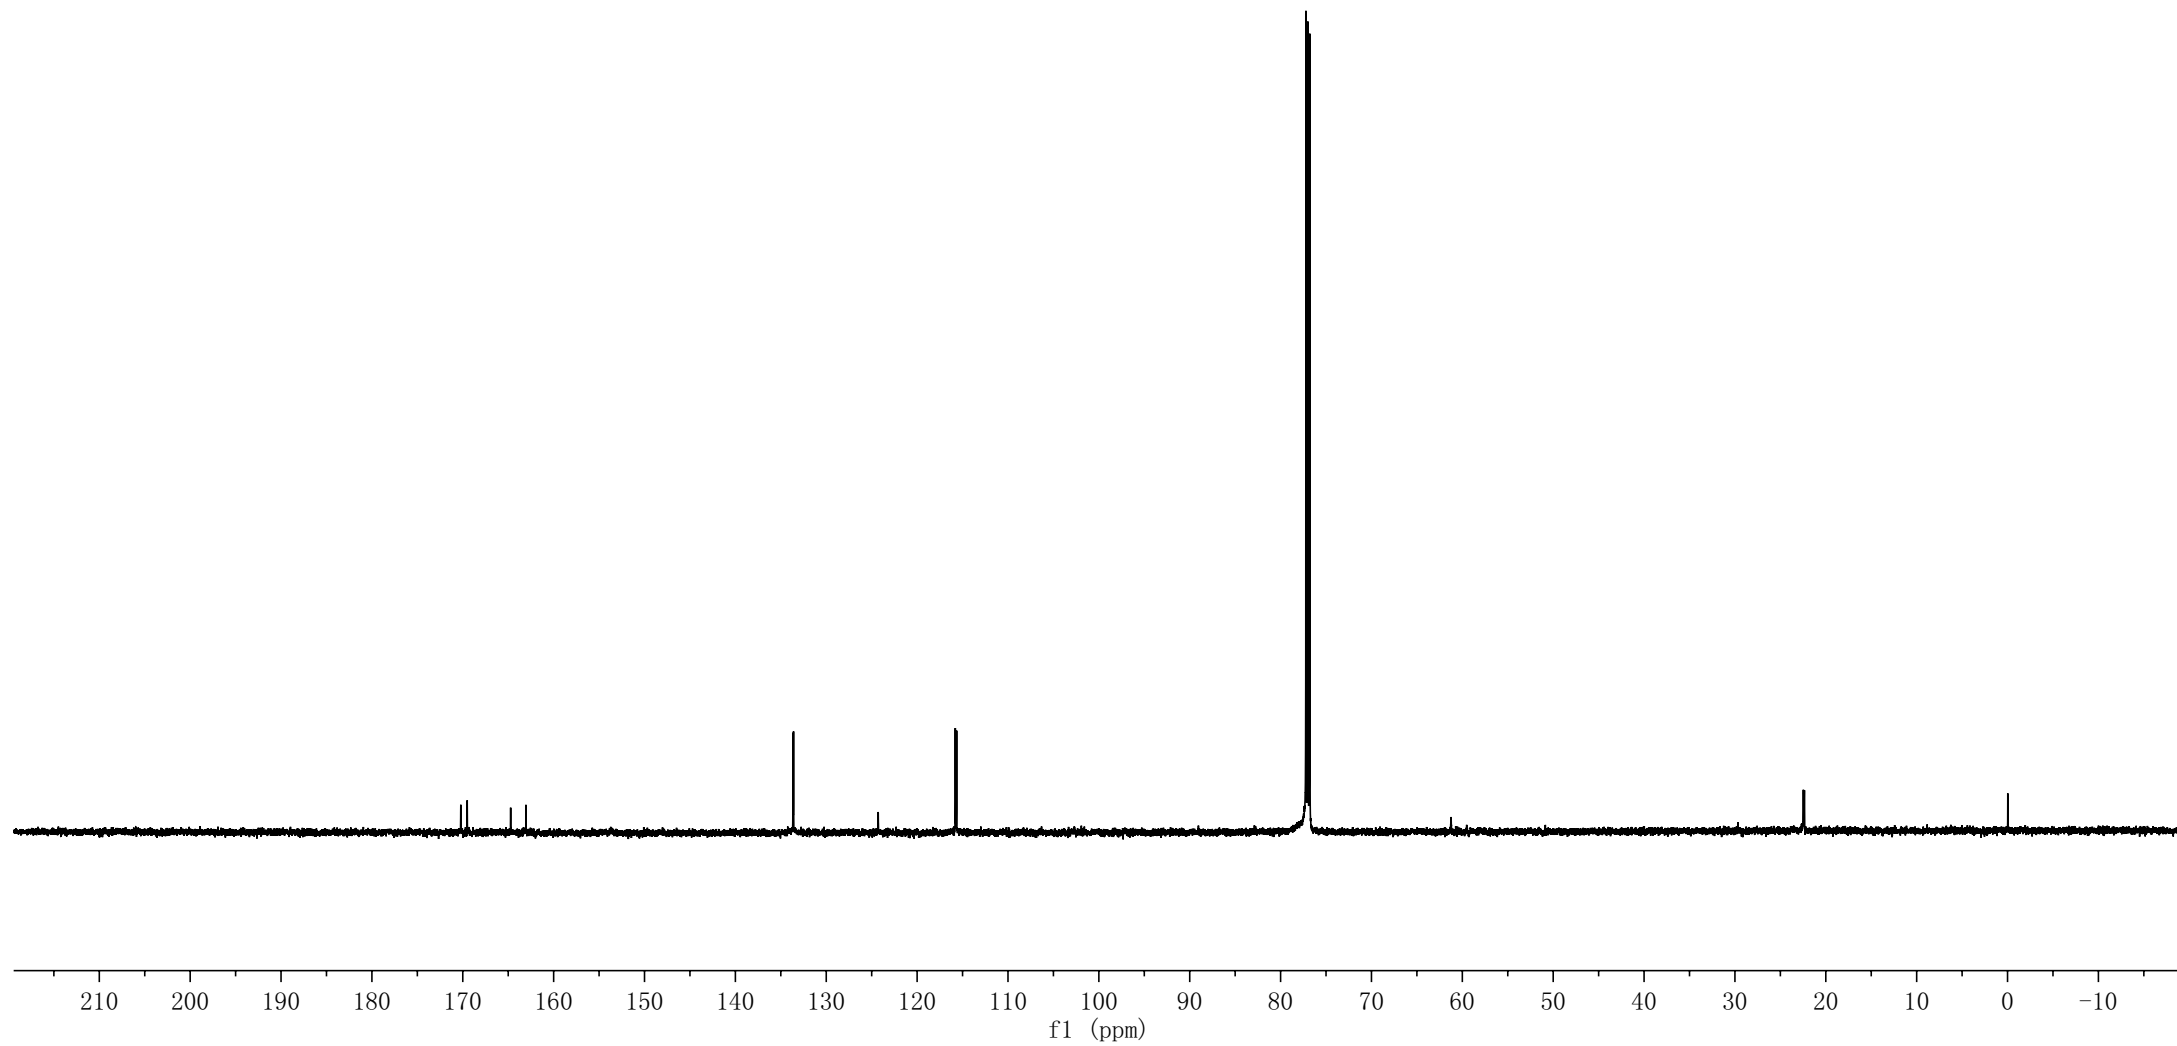

WJ-582-B{H}

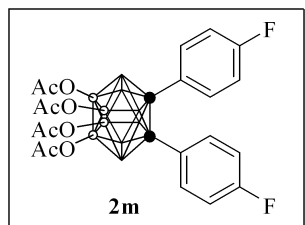

—5.35

—1.88

—15.84

—21.86

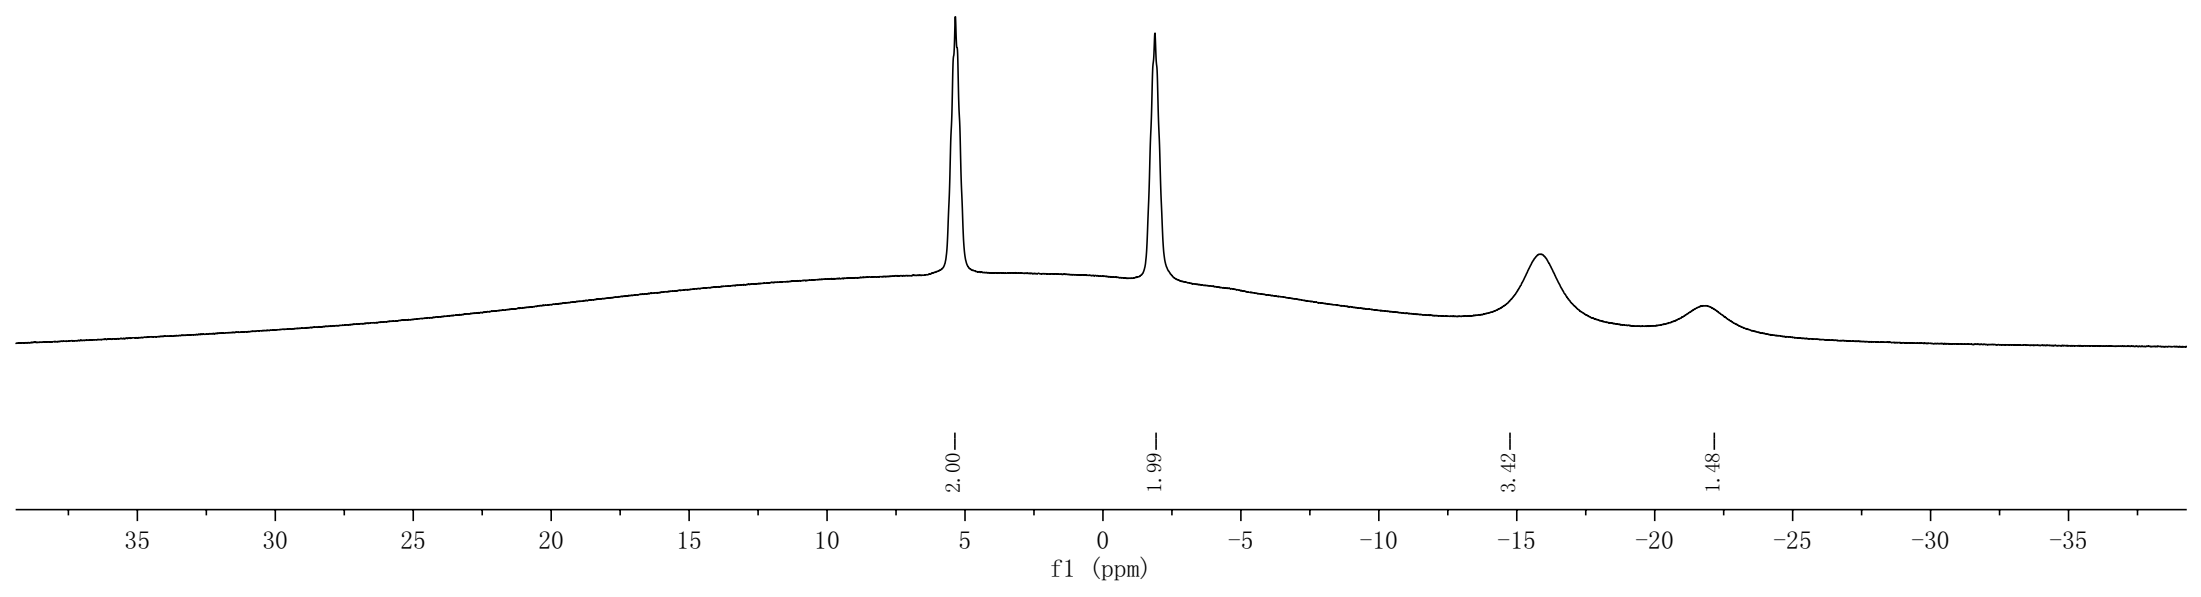

WJ-582-B

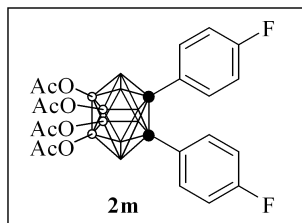

5.35

1.89

16.01

21.96

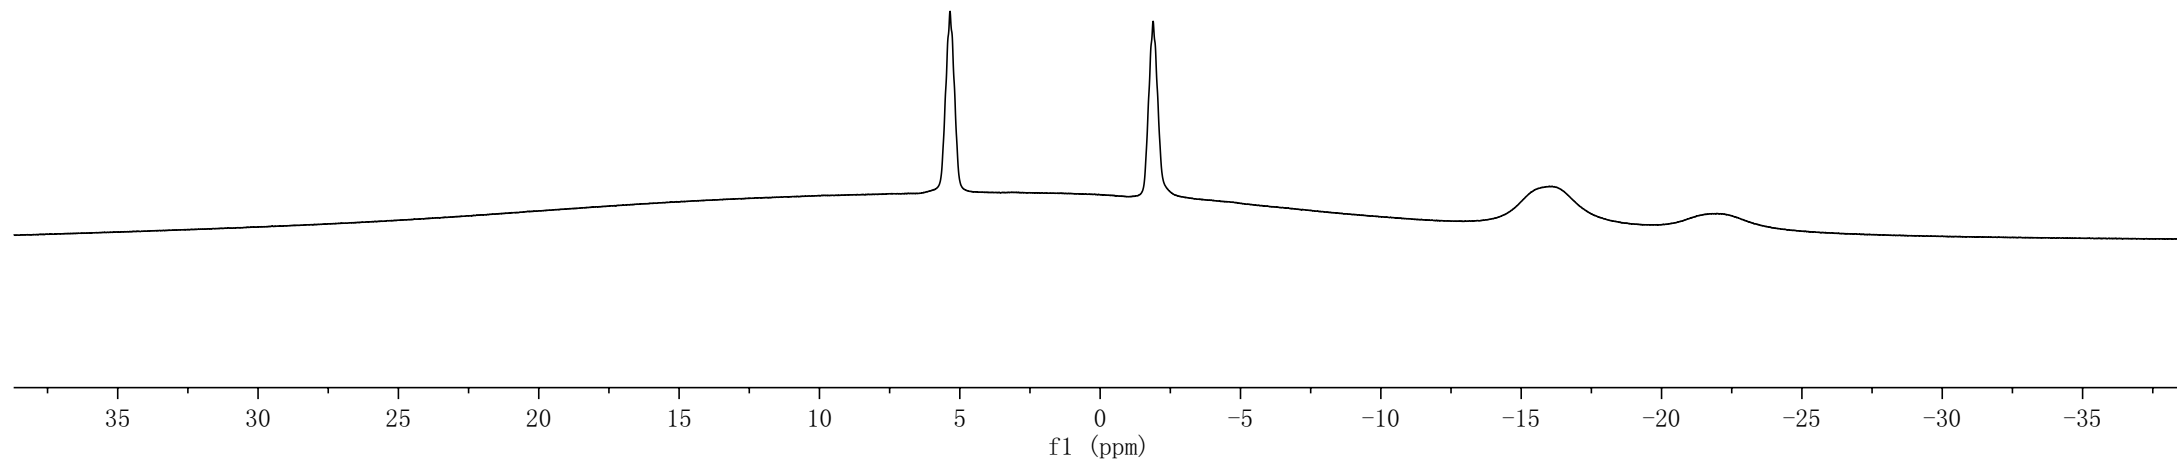



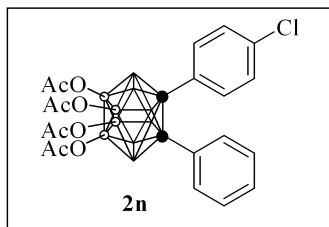

7.52  
7.50  
7.45  
7.43  
7.28  
7.27  
7.26  
7.19  
7.17  
7.16  
7.12  
7.11

2.17  
2.13

-0.00

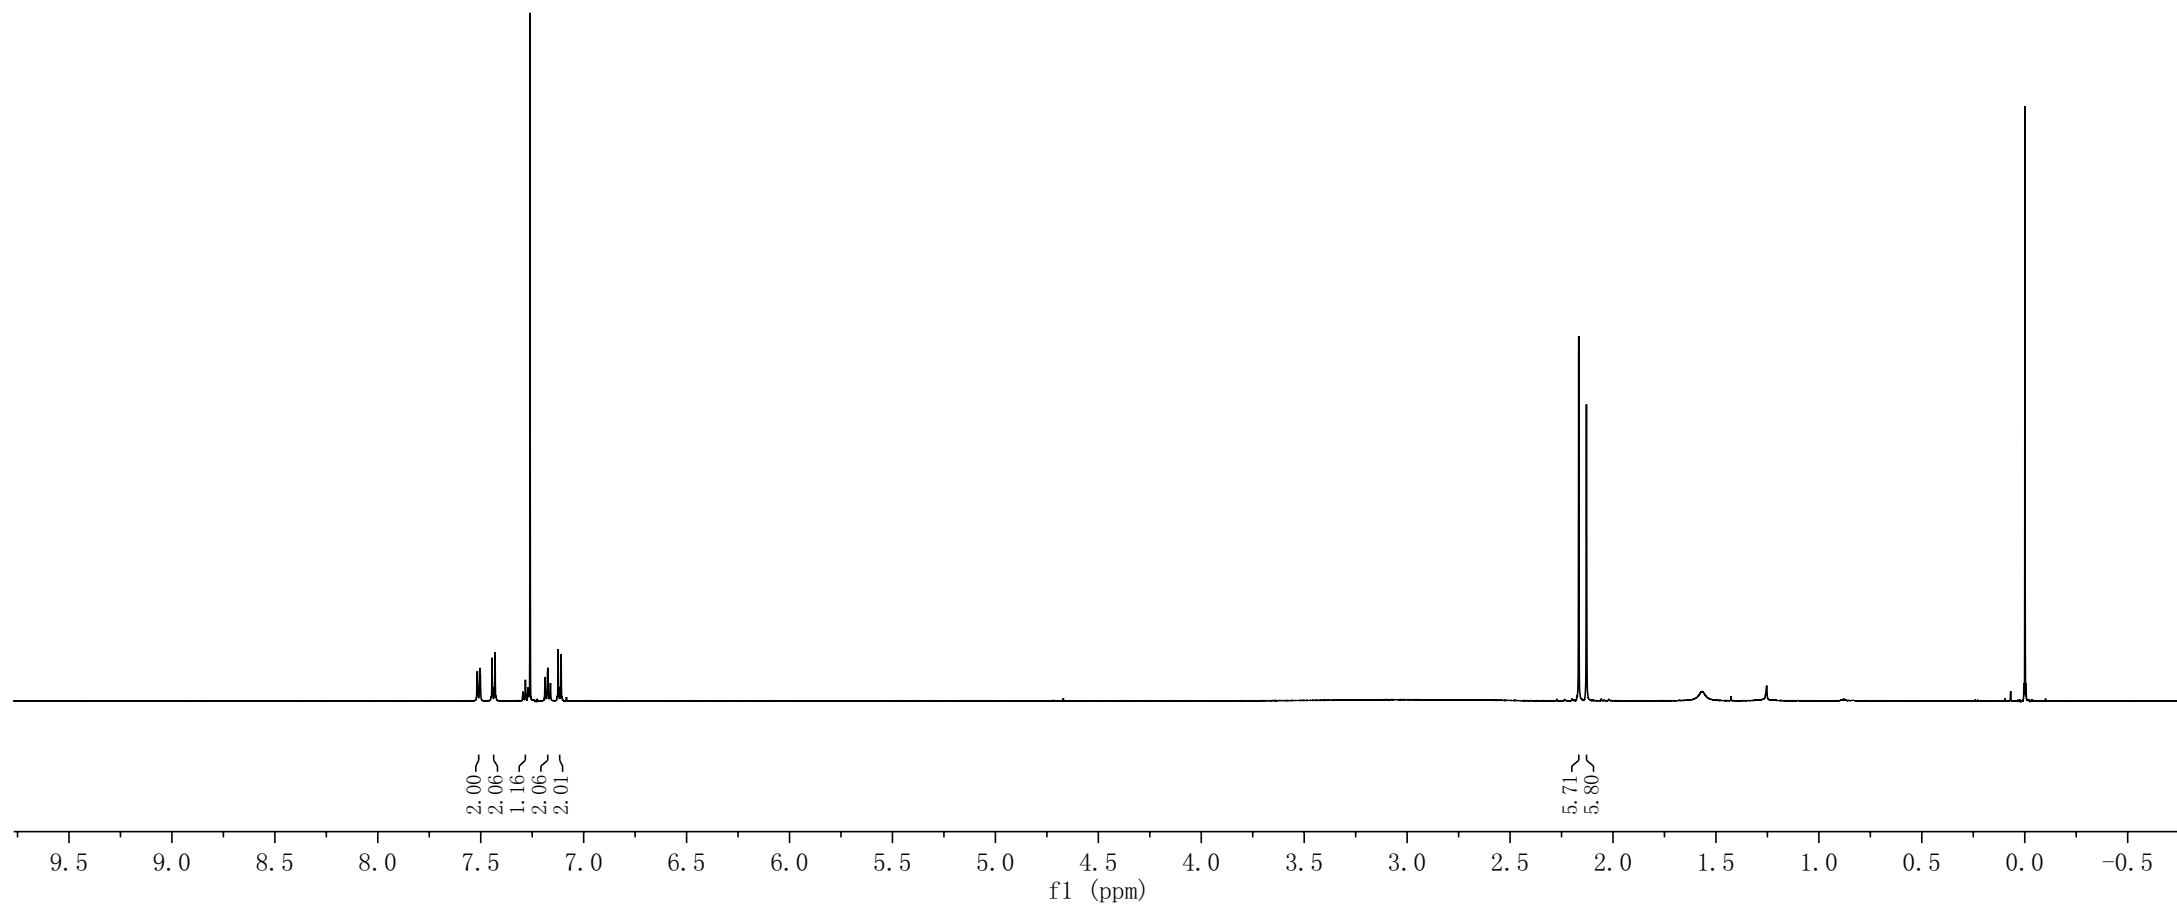

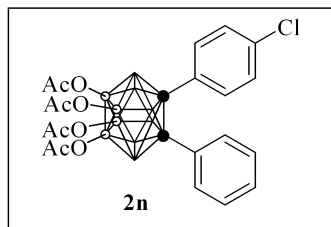170.20  
169.48137.21  
132.72  
131.49  
130.87  
128.66  
128.61  
128.10  
127.0877.21  
77.00  
76.7961.98  
60.9222.48  
22.36

-0.02

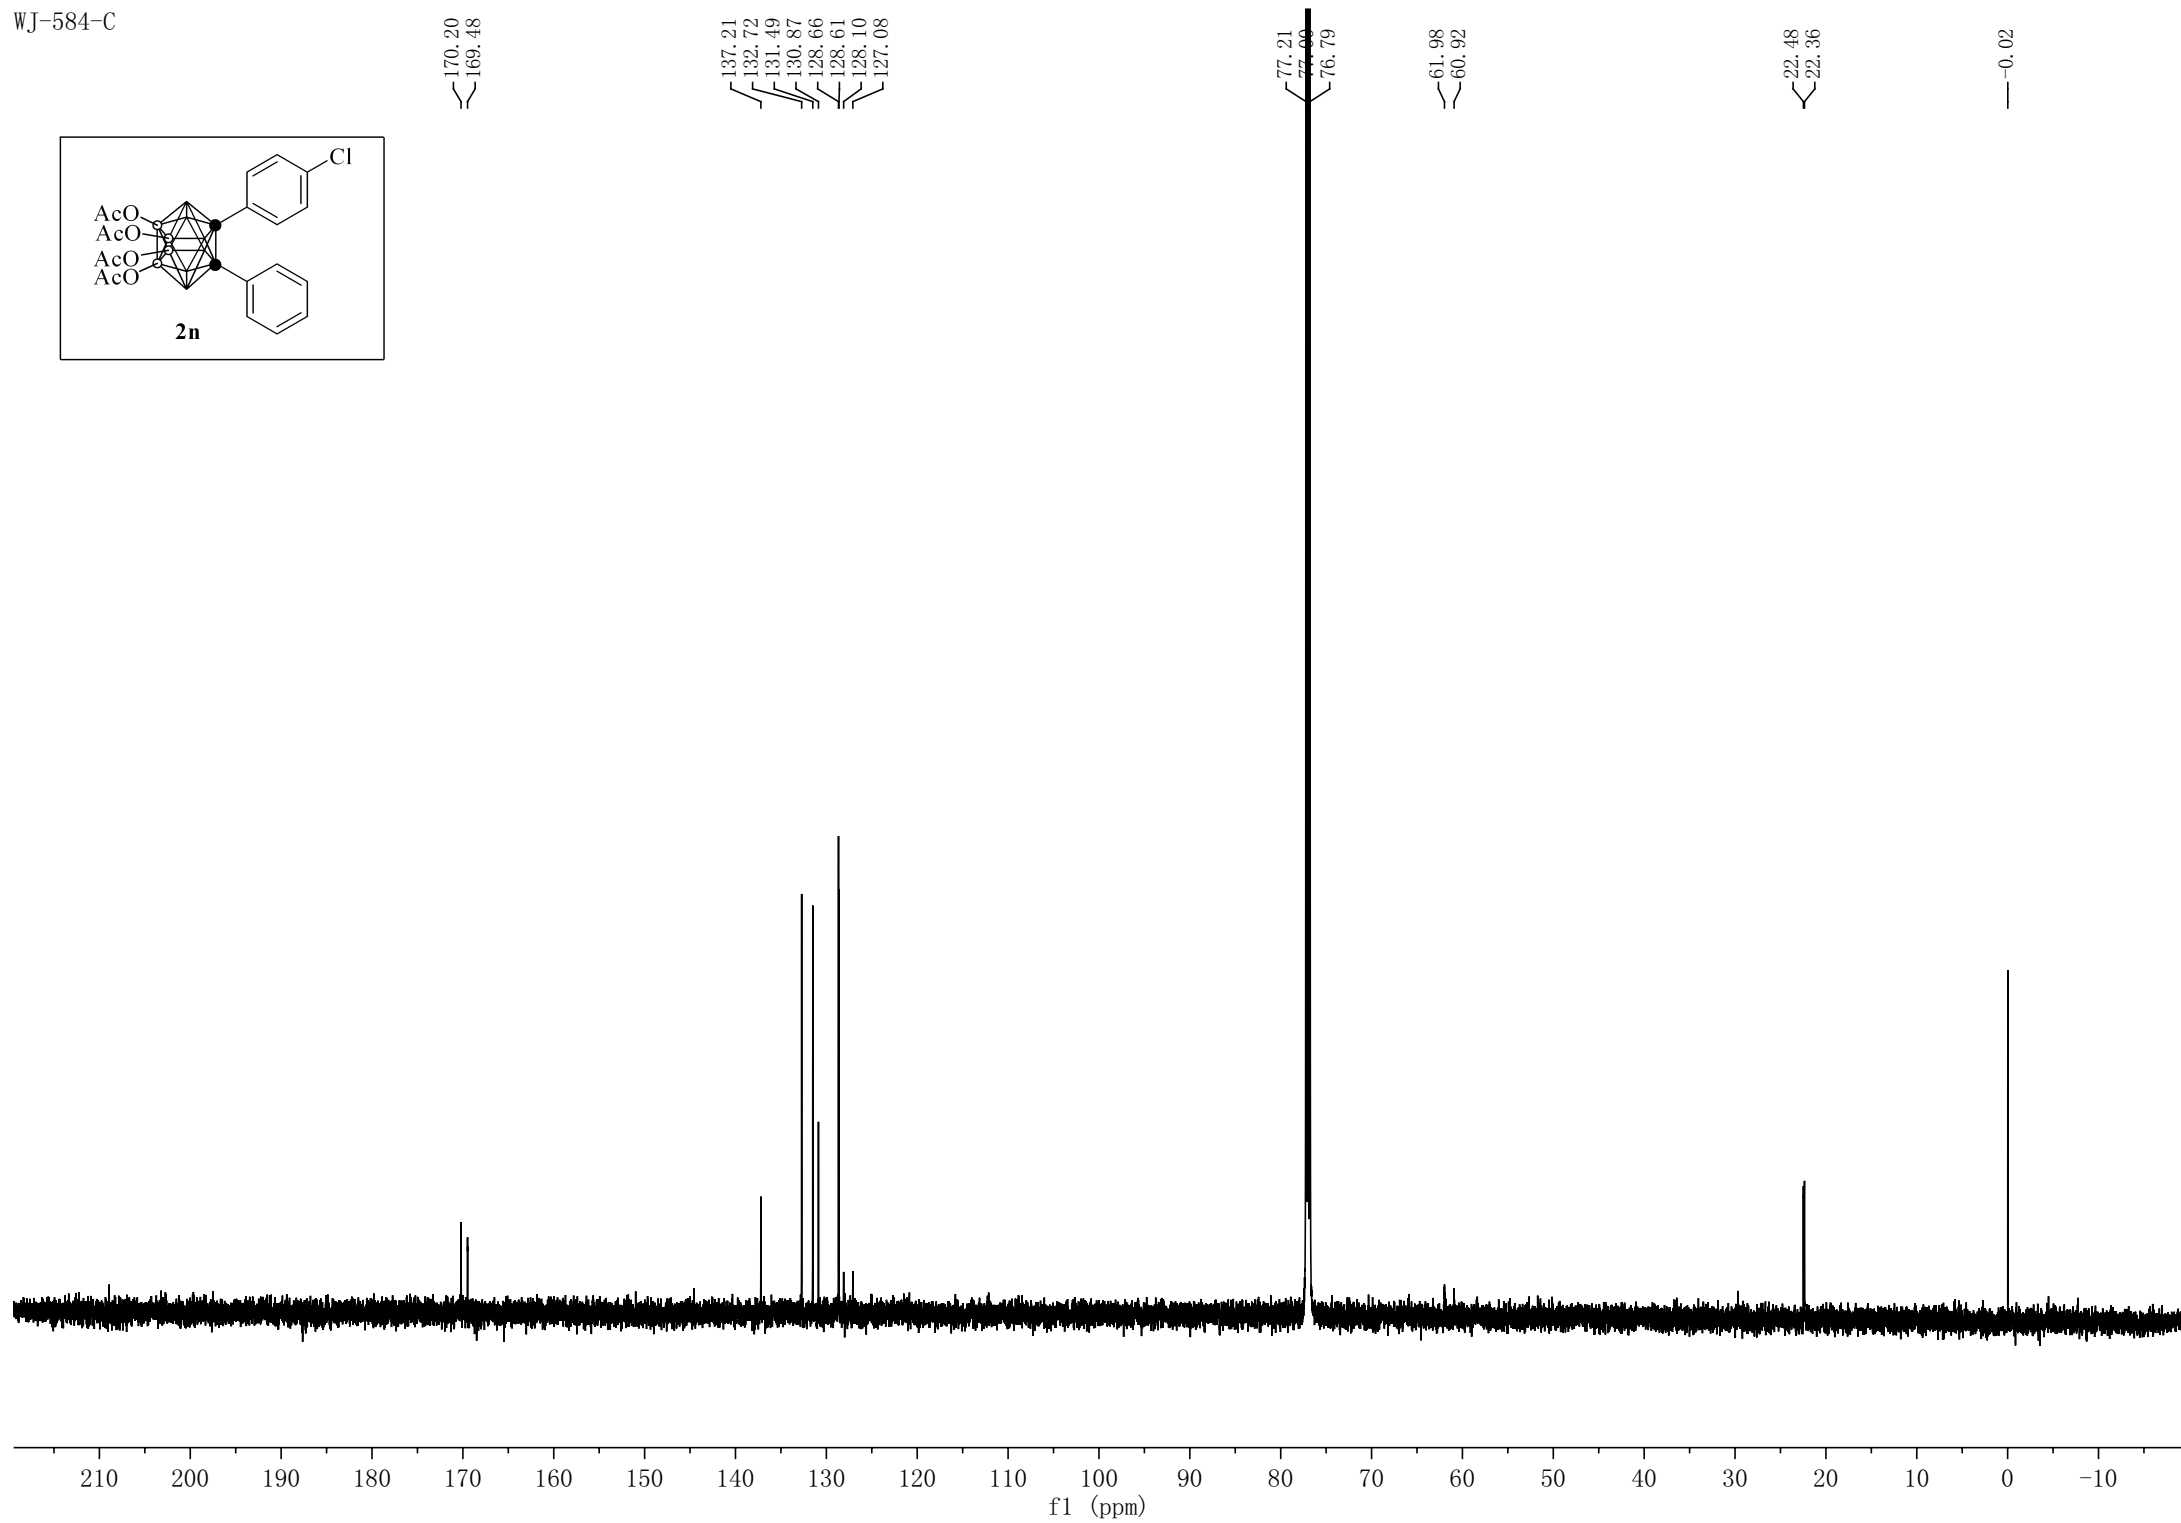

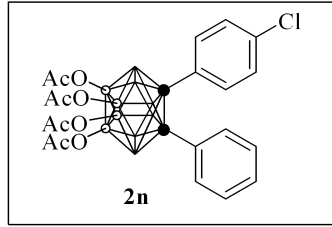

—5.34

—1.84

—15.86

—21.92

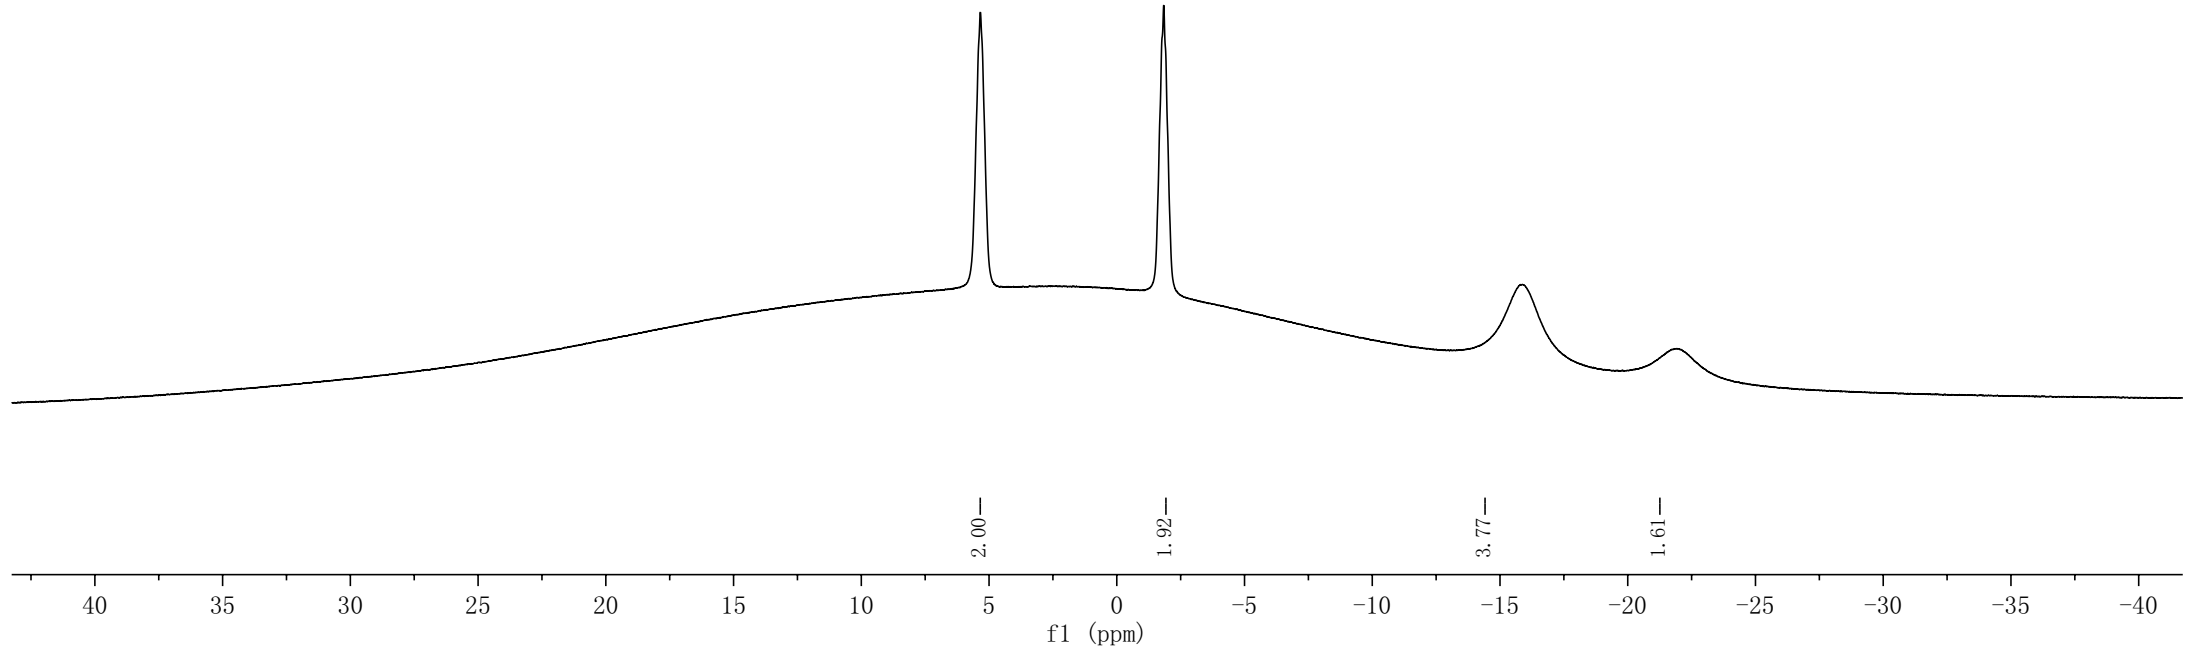

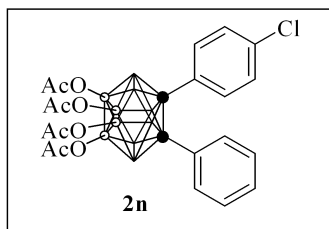

—5.34

—1.84

—15.94

—22.07

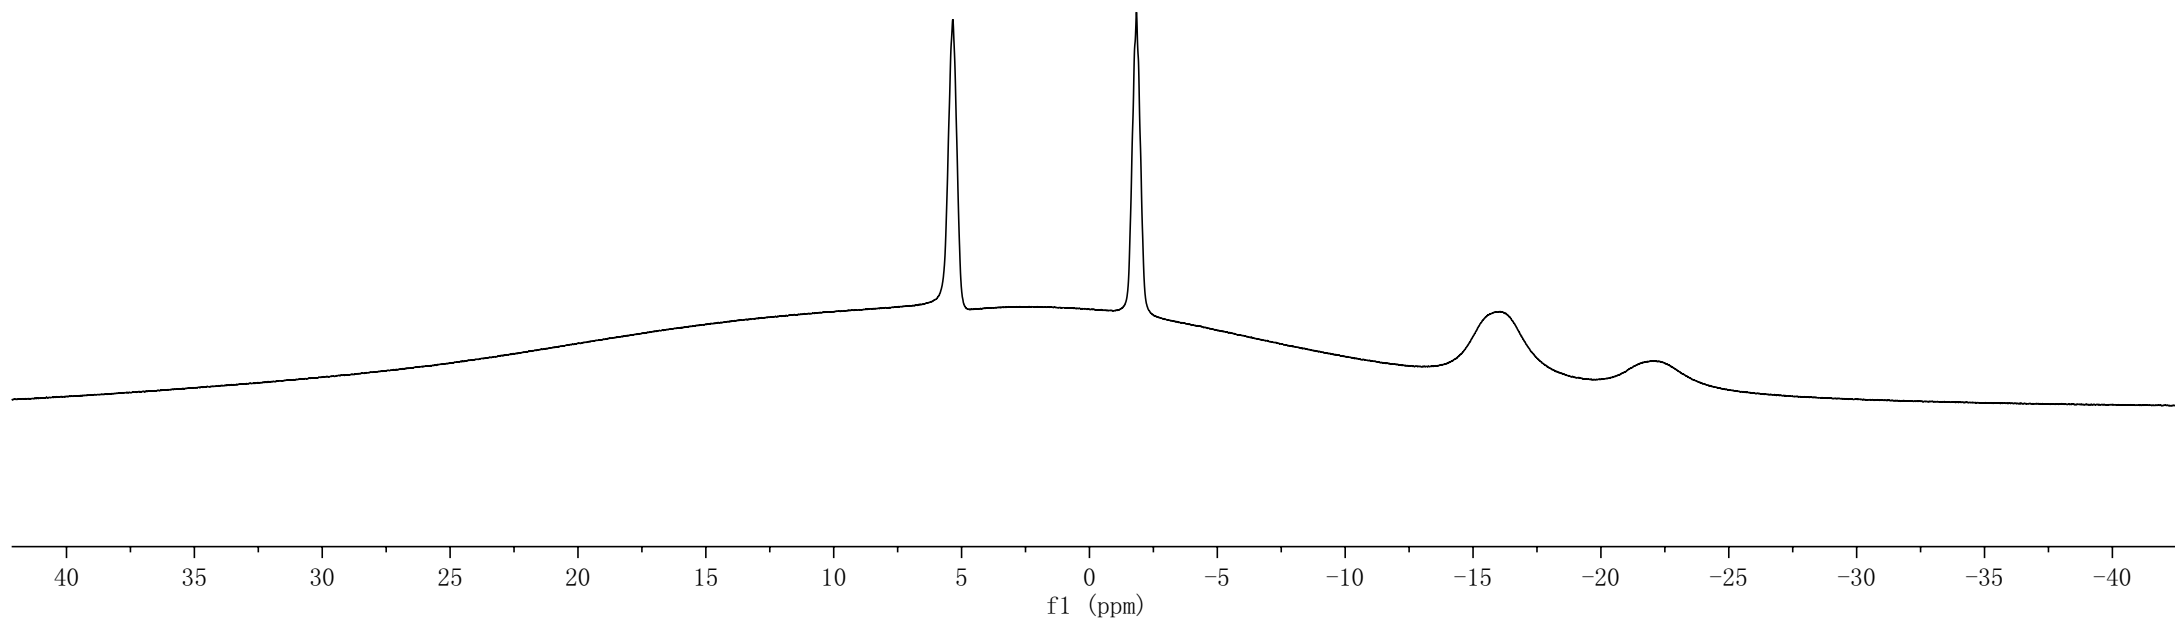

7.52  
7.50  
7.50  
7.37  
7.37  
7.36  
7.36  
7.30  
7.29  
7.28  
7.28  
7.27  
7.27  
7.27  
7.26  
7.19  
7.18  
7.16

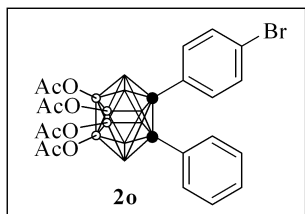

2.17  
2.13

-0.00

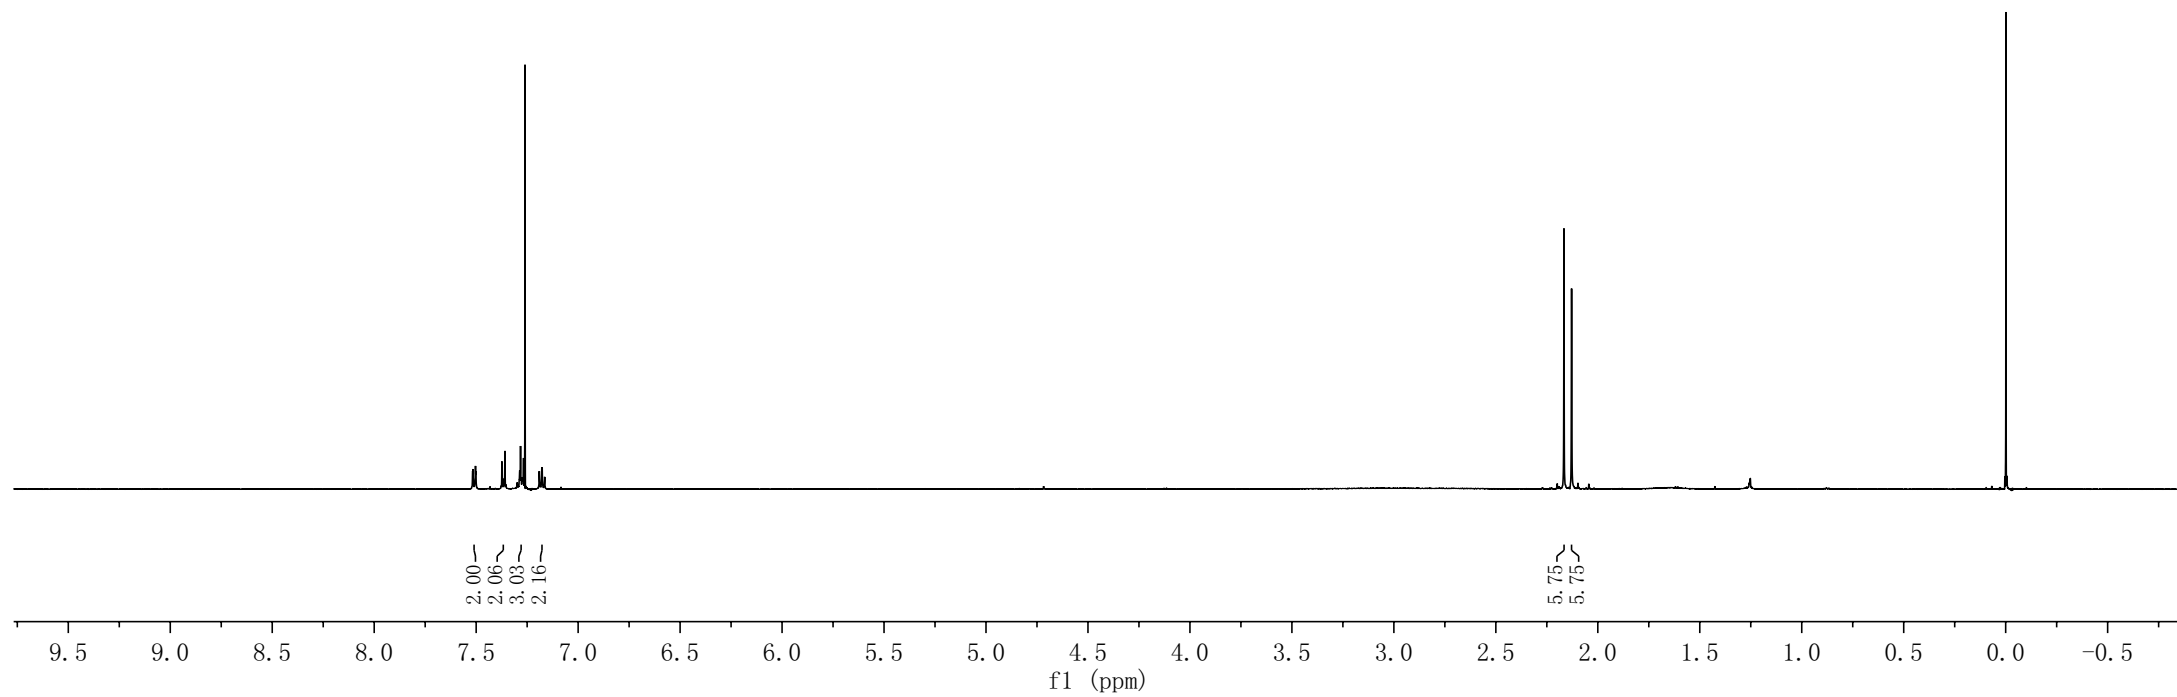

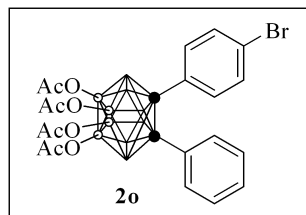170.21  
169.49132.91  
131.65  
131.49  
130.89  
128.63  
128.07  
127.62  
125.6177.21  
77.00  
76.7961.91  
60.9722.48  
22.37

-0.02

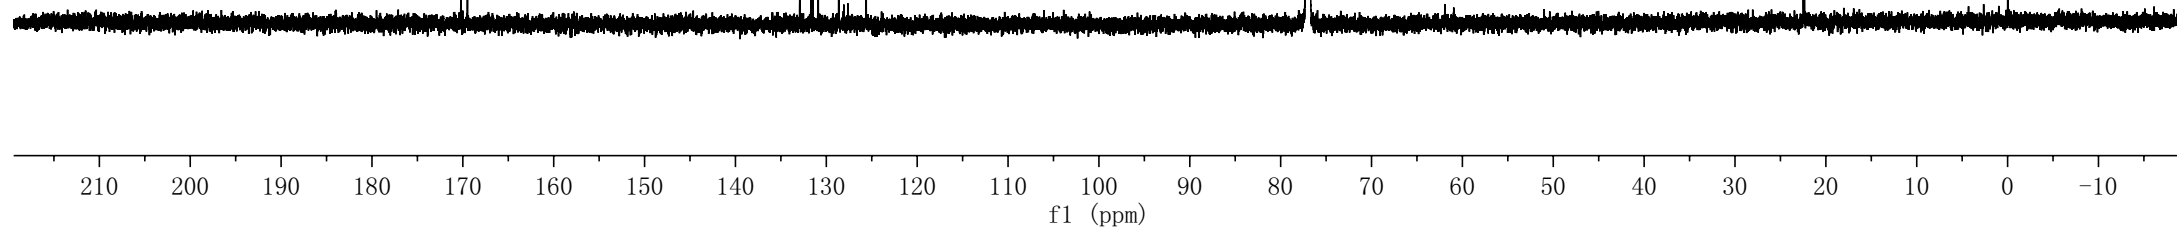

WJ-656-B{H}

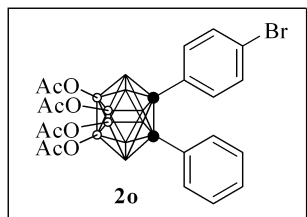

—5.35

—1.83

—15.89

—22.02

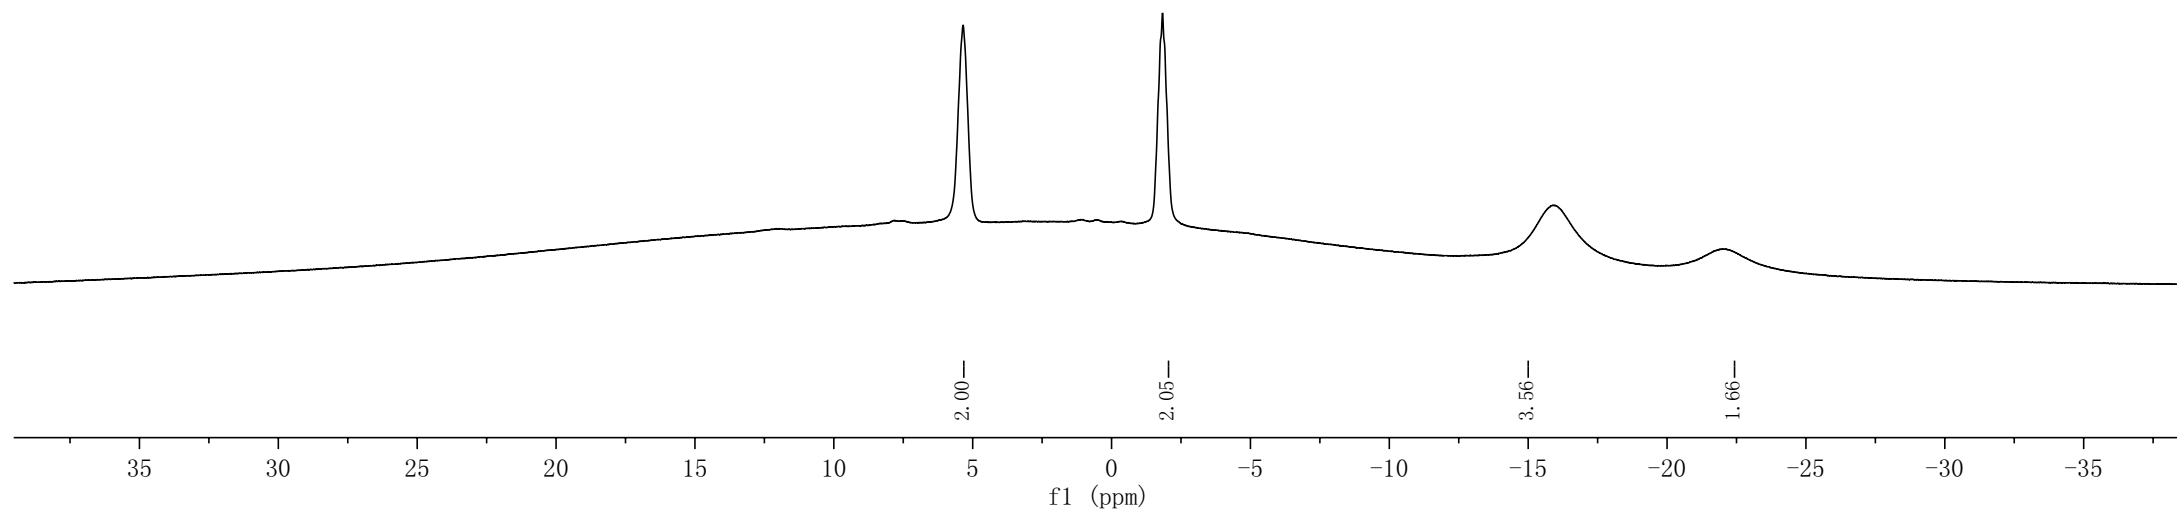

WJ-656-B

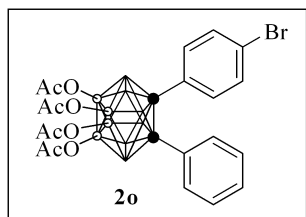

—5.35

—1.88

—15.89

—22.03

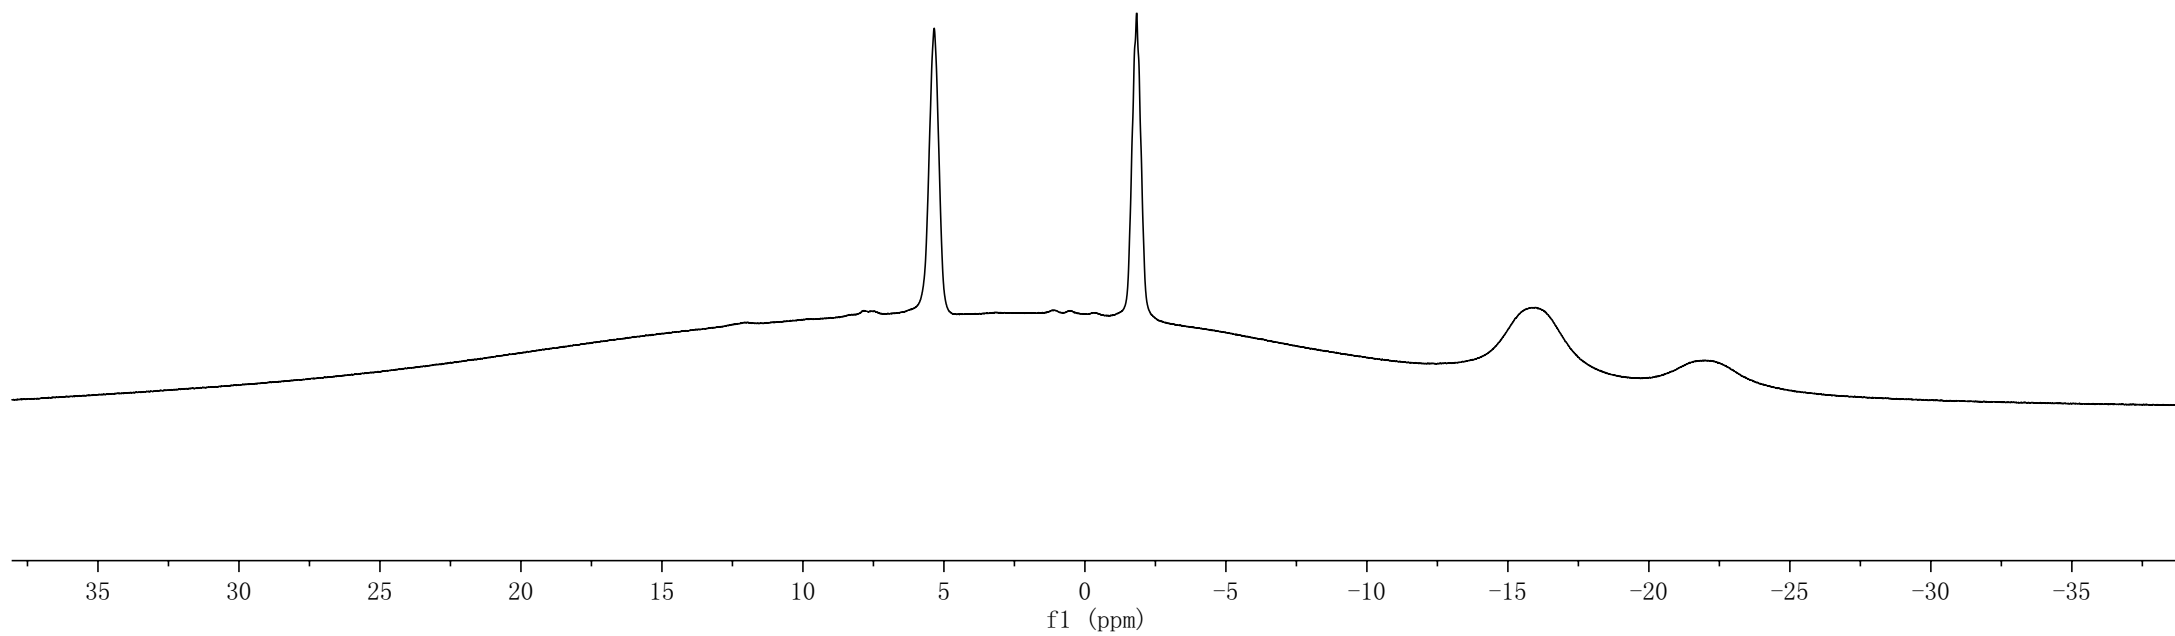



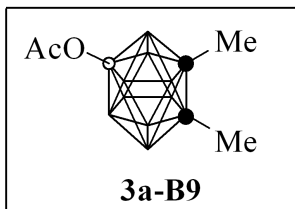

— 7.26

2.06  
2.04  
2.01

— 0.01

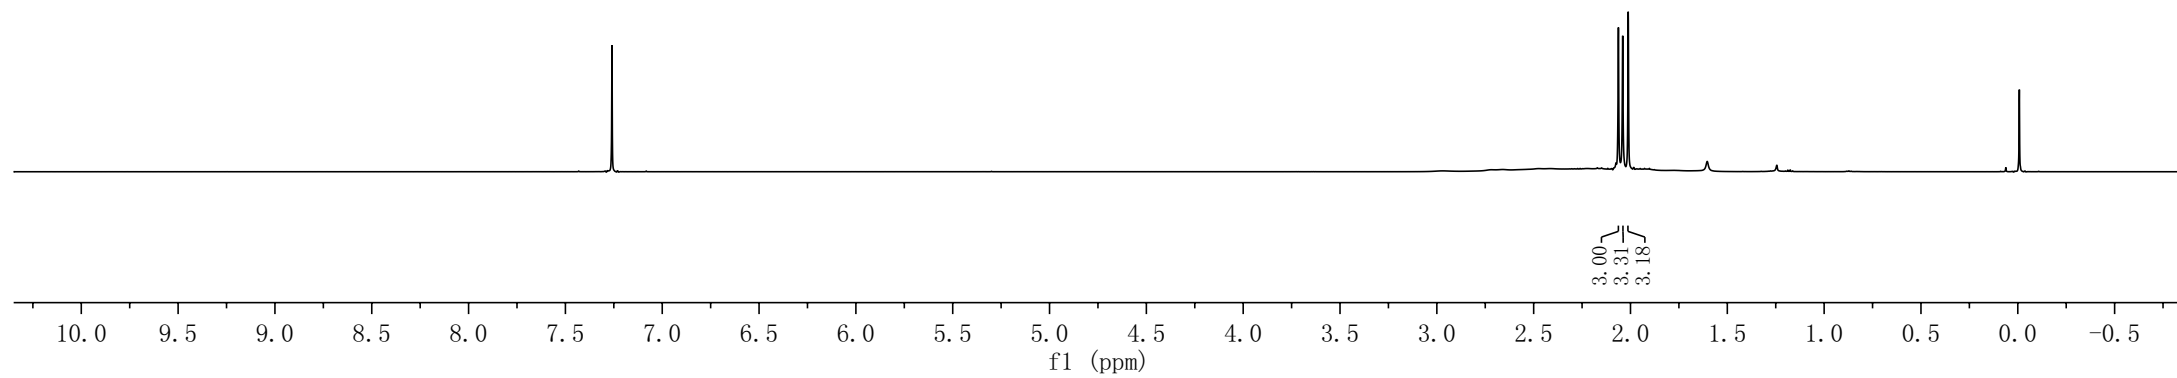

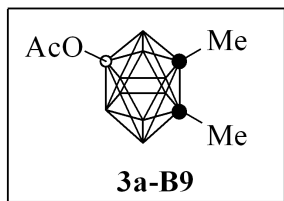

— 170.05

77.21  
77.00  
76.79

— 68.99

— 61.87

23.68  
22.62  
21.16

— 0.02

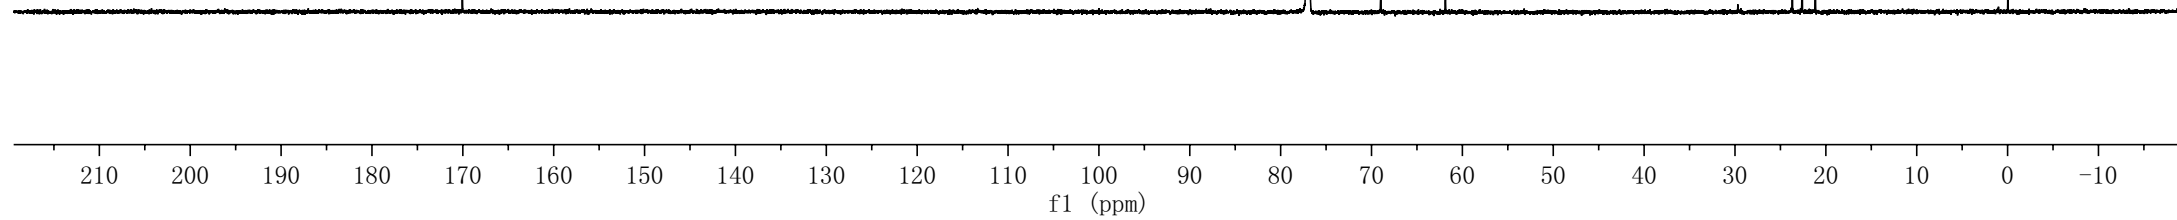

XT-400-B9-B {H}

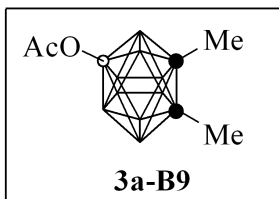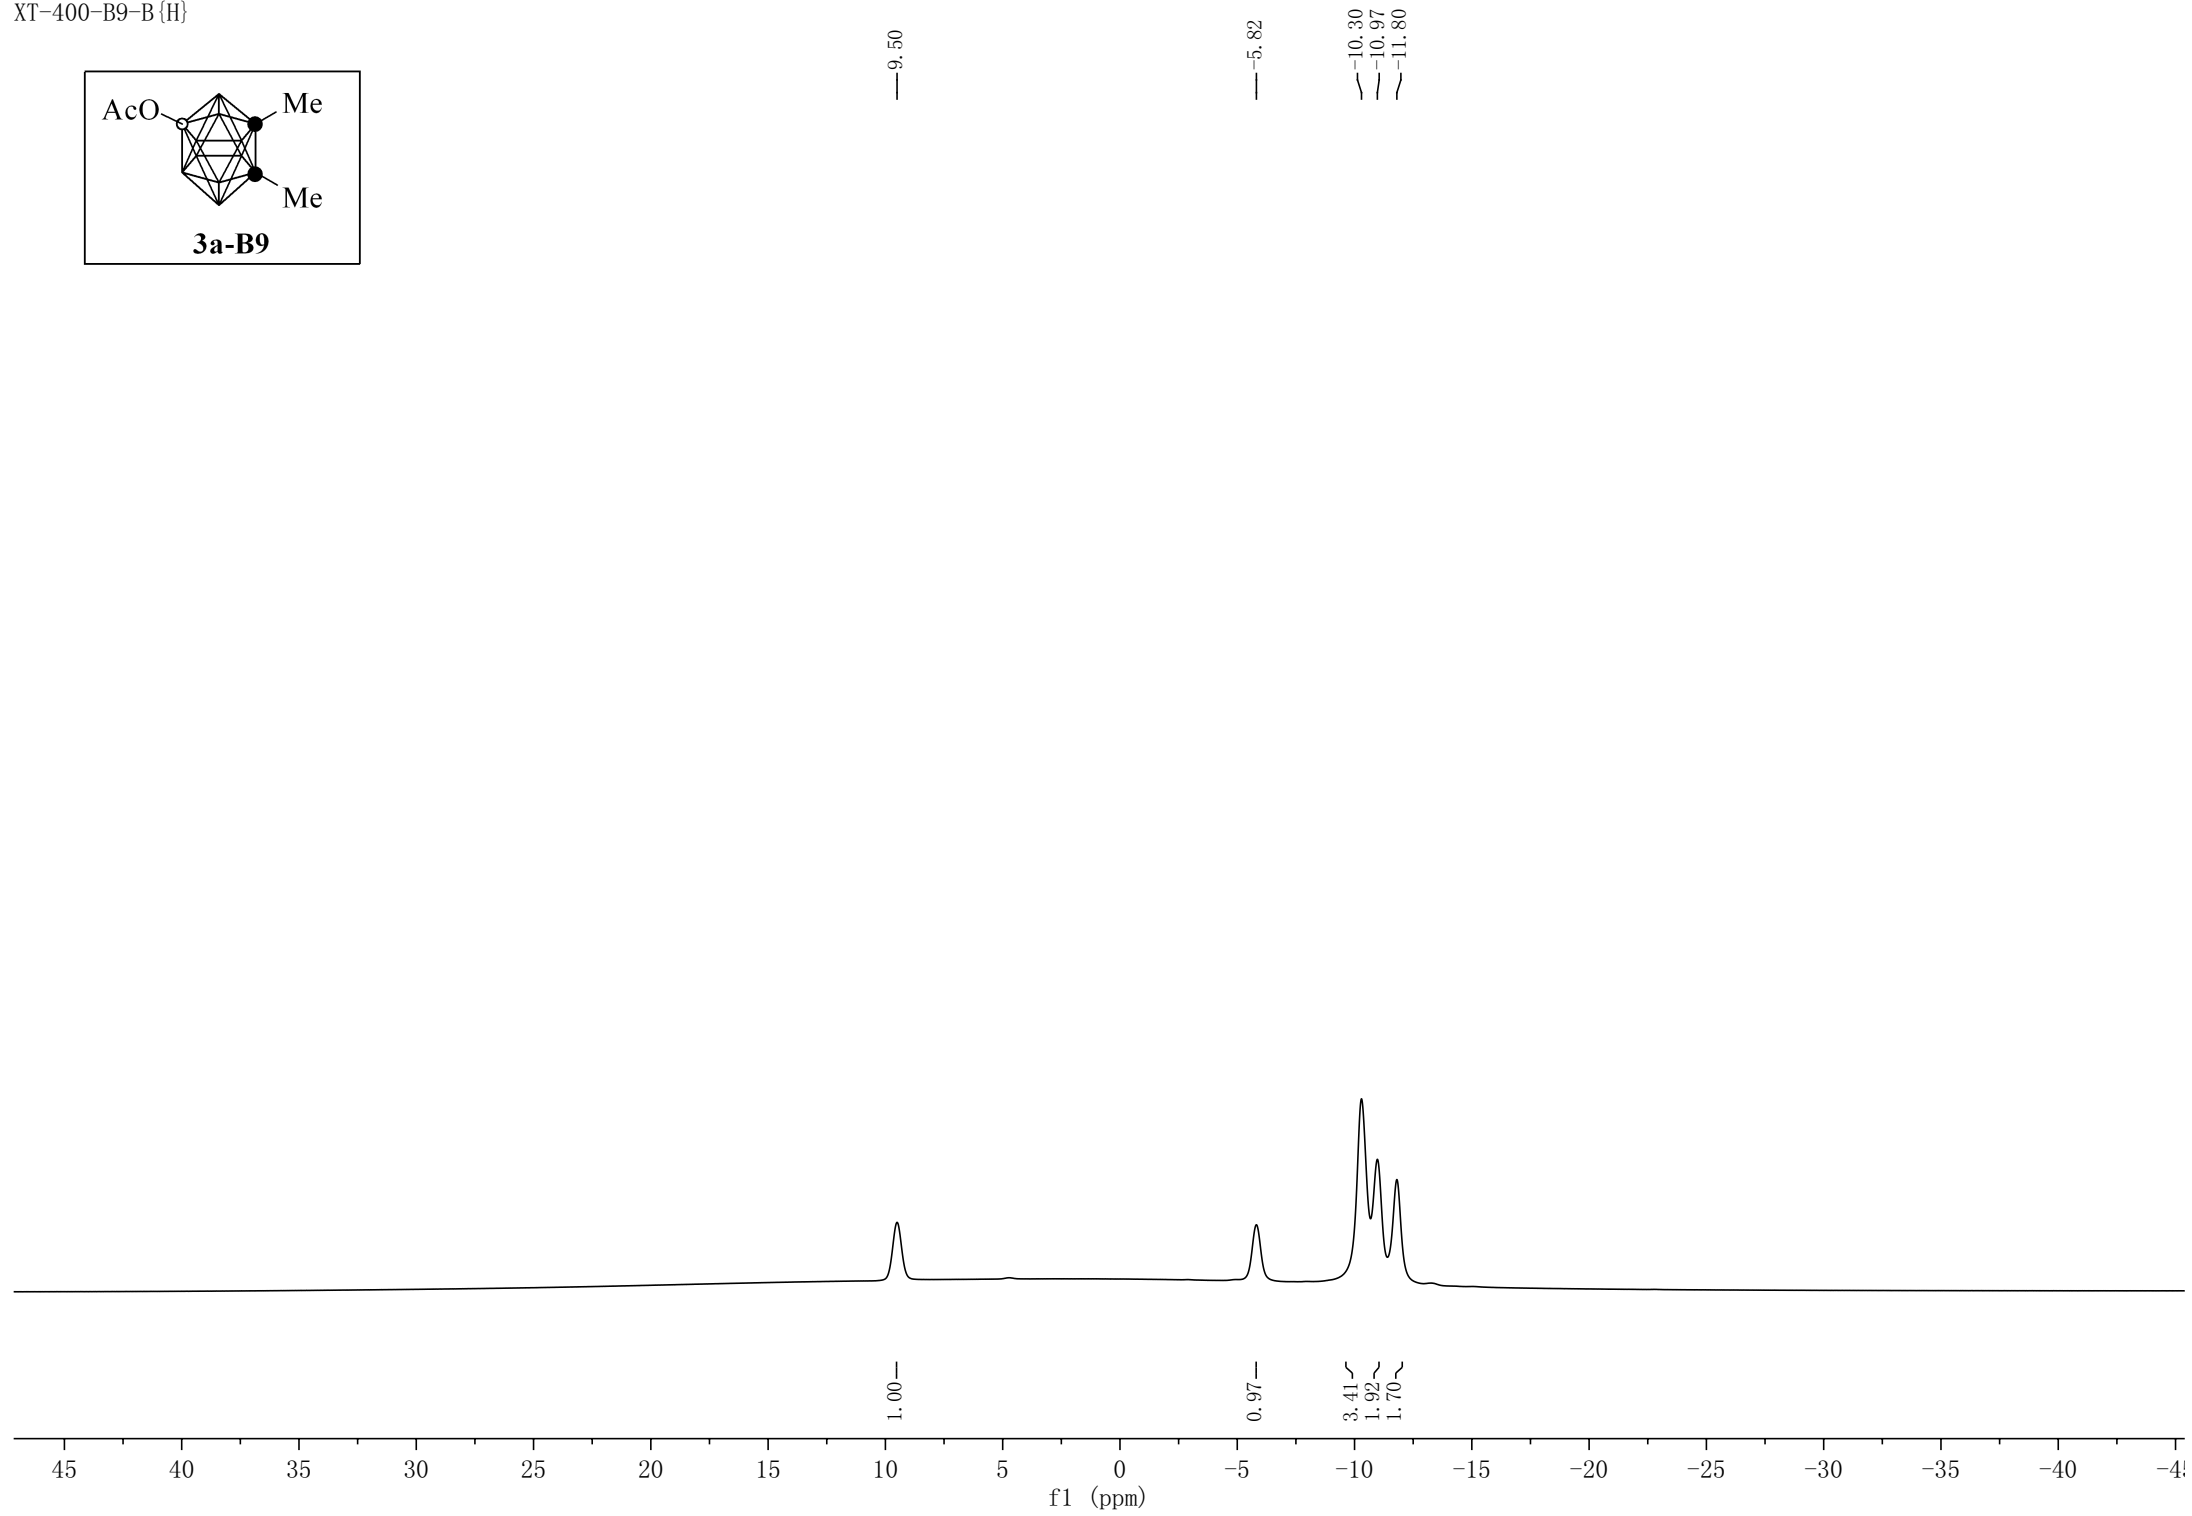

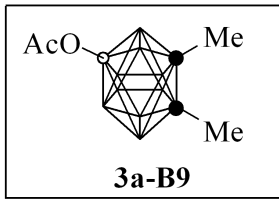

— 9.51

— 5.43  
— 6.20

— 9.85  
— 10.68  
— 11.38  
— 12.23

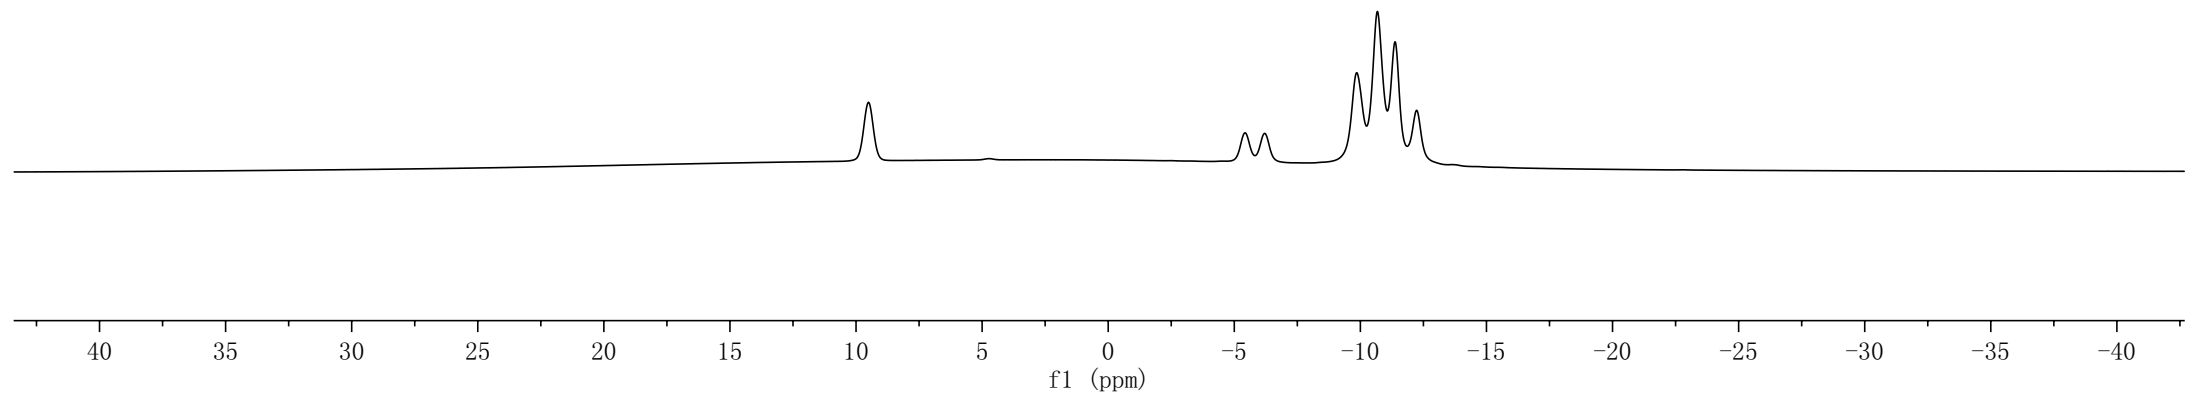

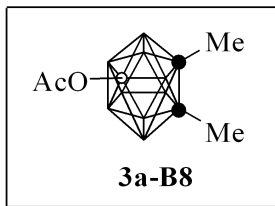

— 7.26

2.08  
2.04

— 0.01

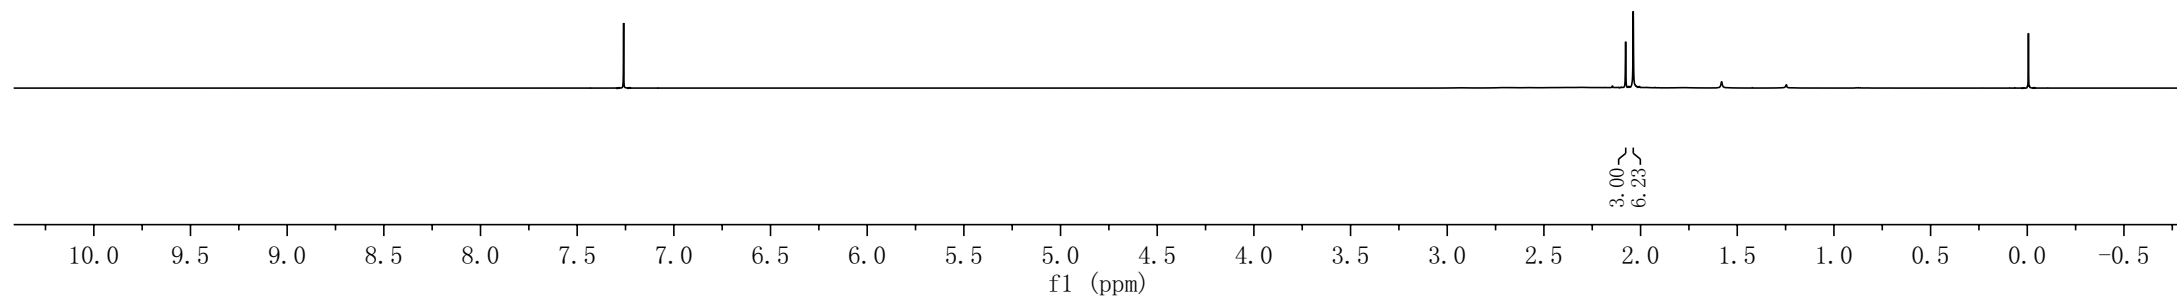

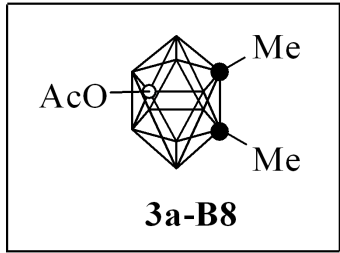

— 170.50

77.21  
77.00  
76.79

— 68.51

22.98  
22.52

— 0.02

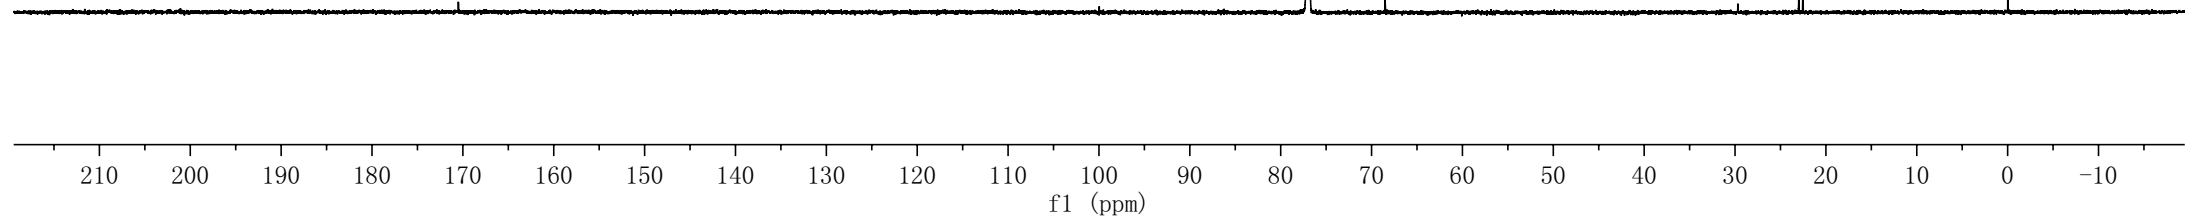

XT-400-B8-B {H}

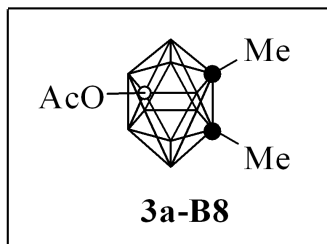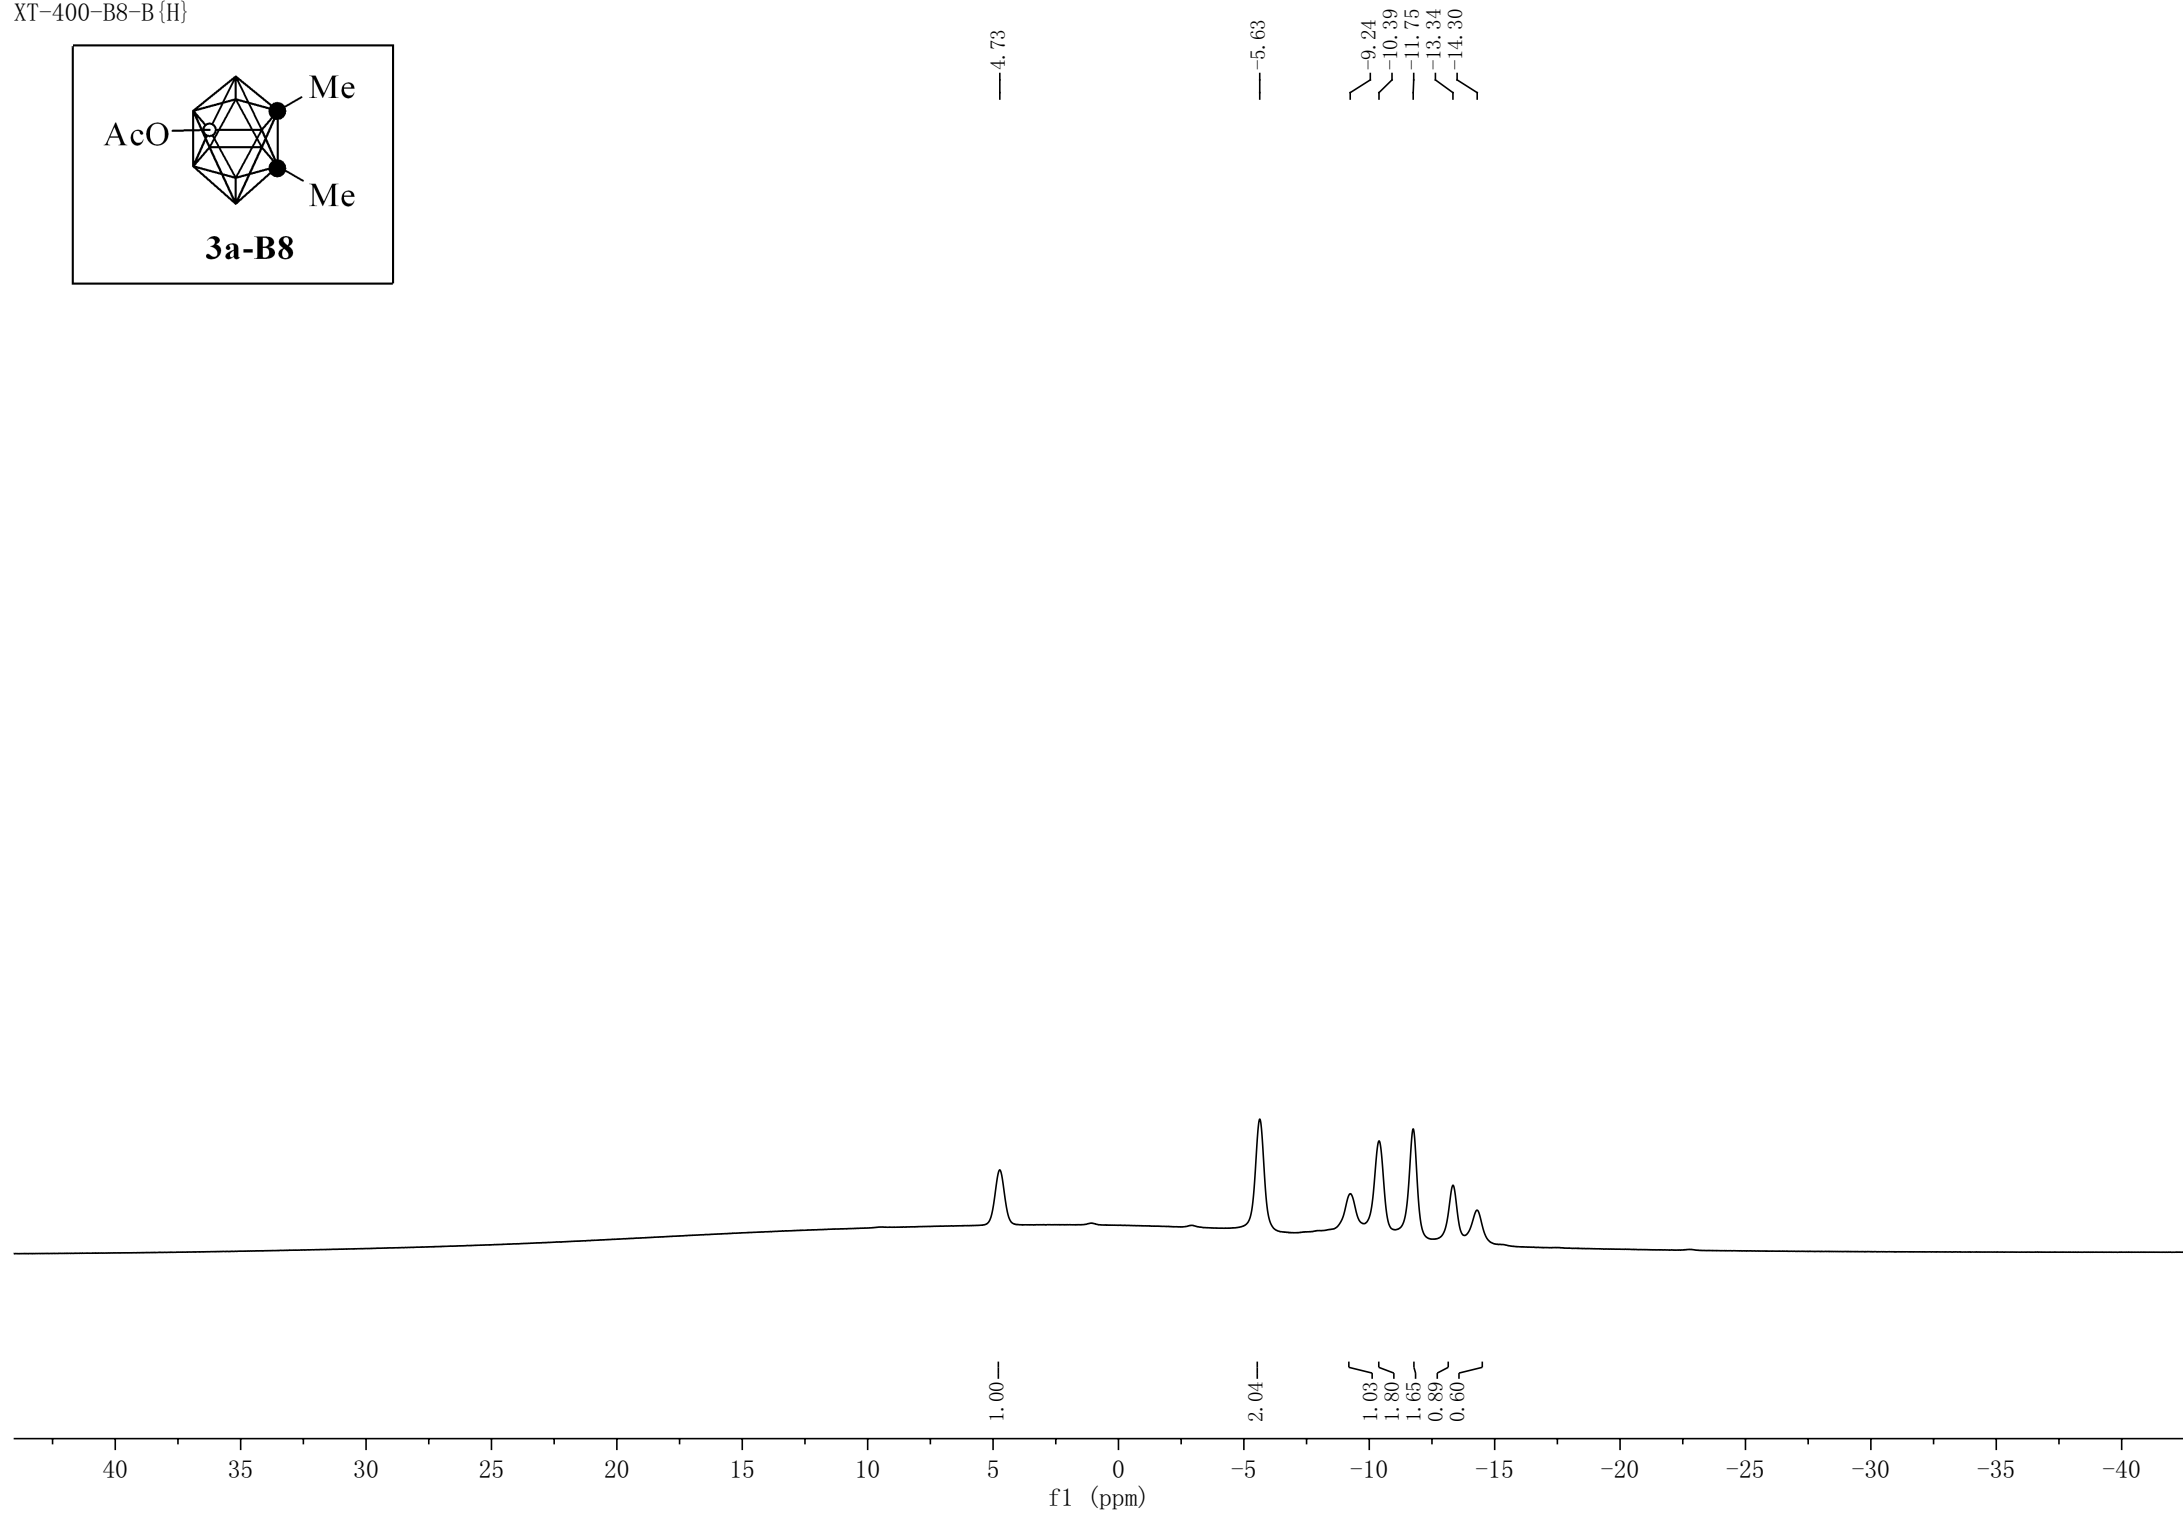

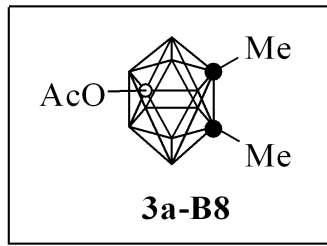

—4.73

—5.26  
—6.03

—8.79  
—9.94  
—10.84  
—11.33  
—12.20  
—12.96  
—13.78  
—14.78

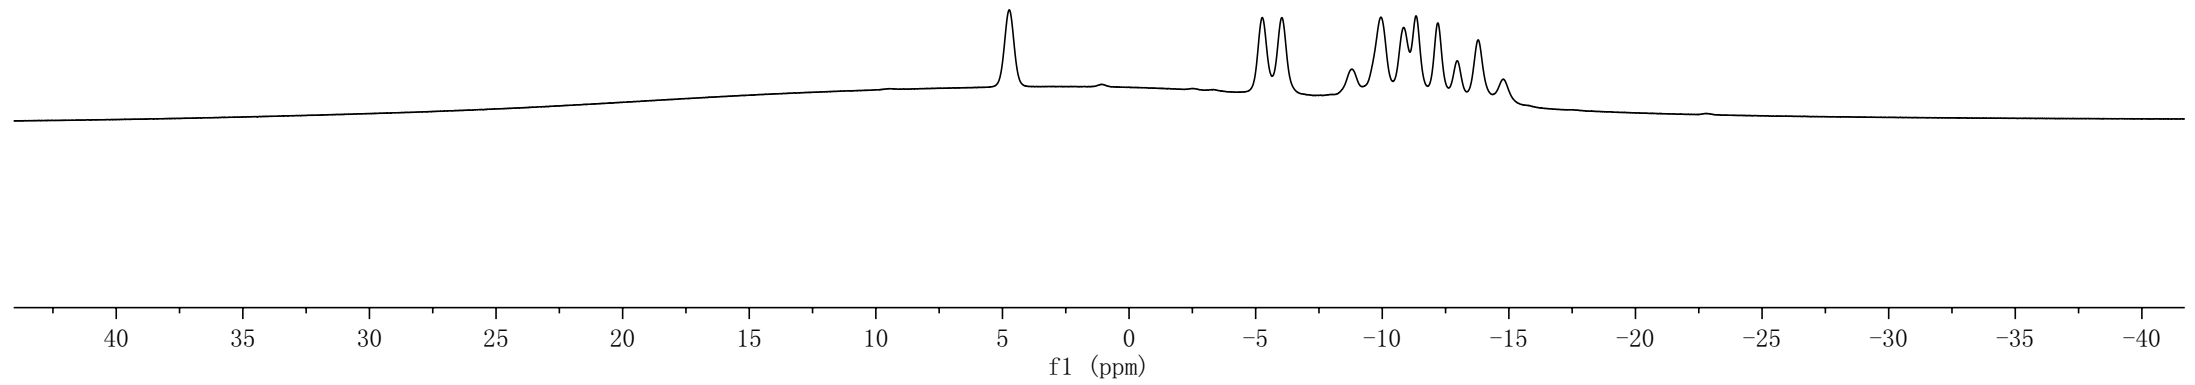



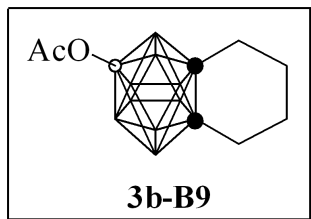

—7.26

2.44  
2.44  
2.44  
2.43  
2.43  
—2.09

1.59  
1.59  
1.58

—0.01

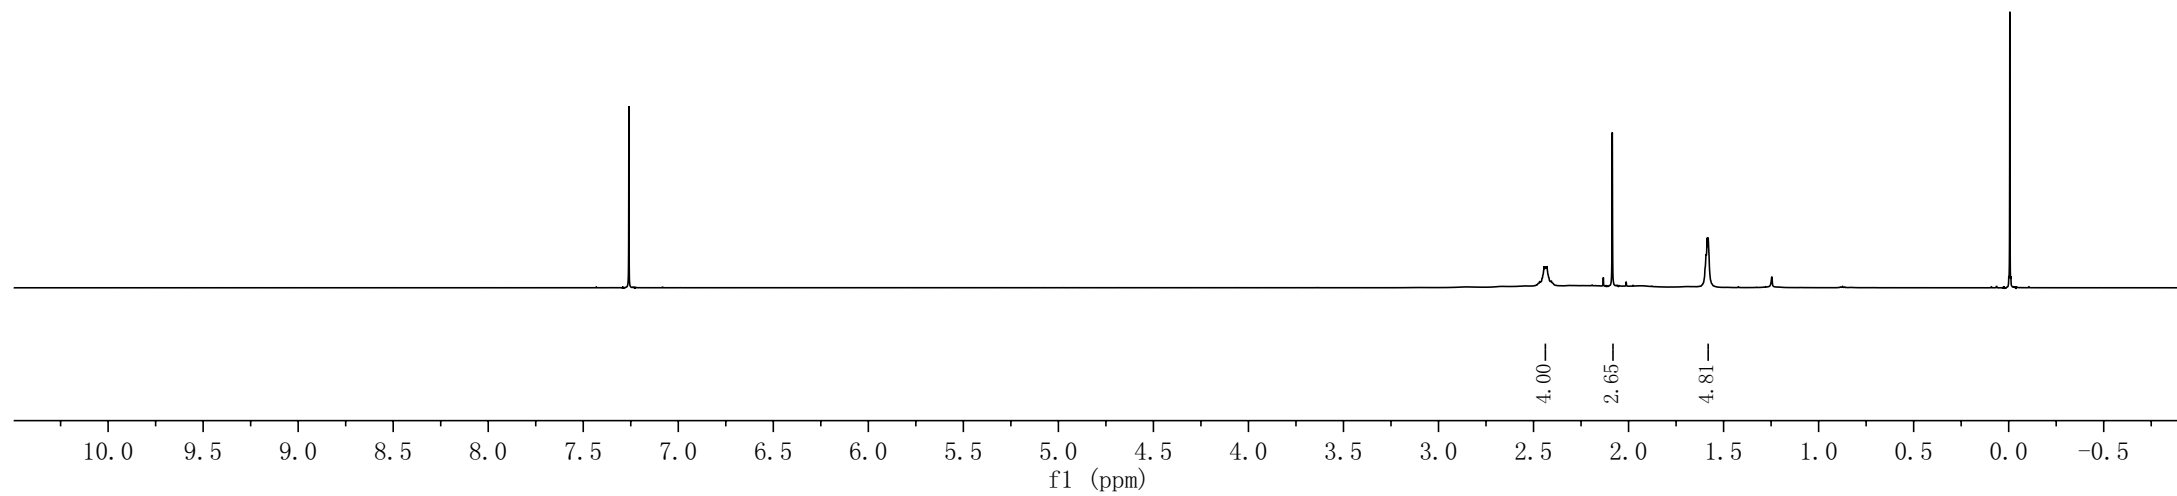

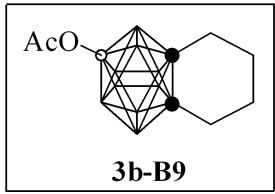

— 170.09

77.21  
77.00  
76.79

— 68.64

— 61.58

32.98  
30.88

22.63  
19.89  
19.30

— 0.02

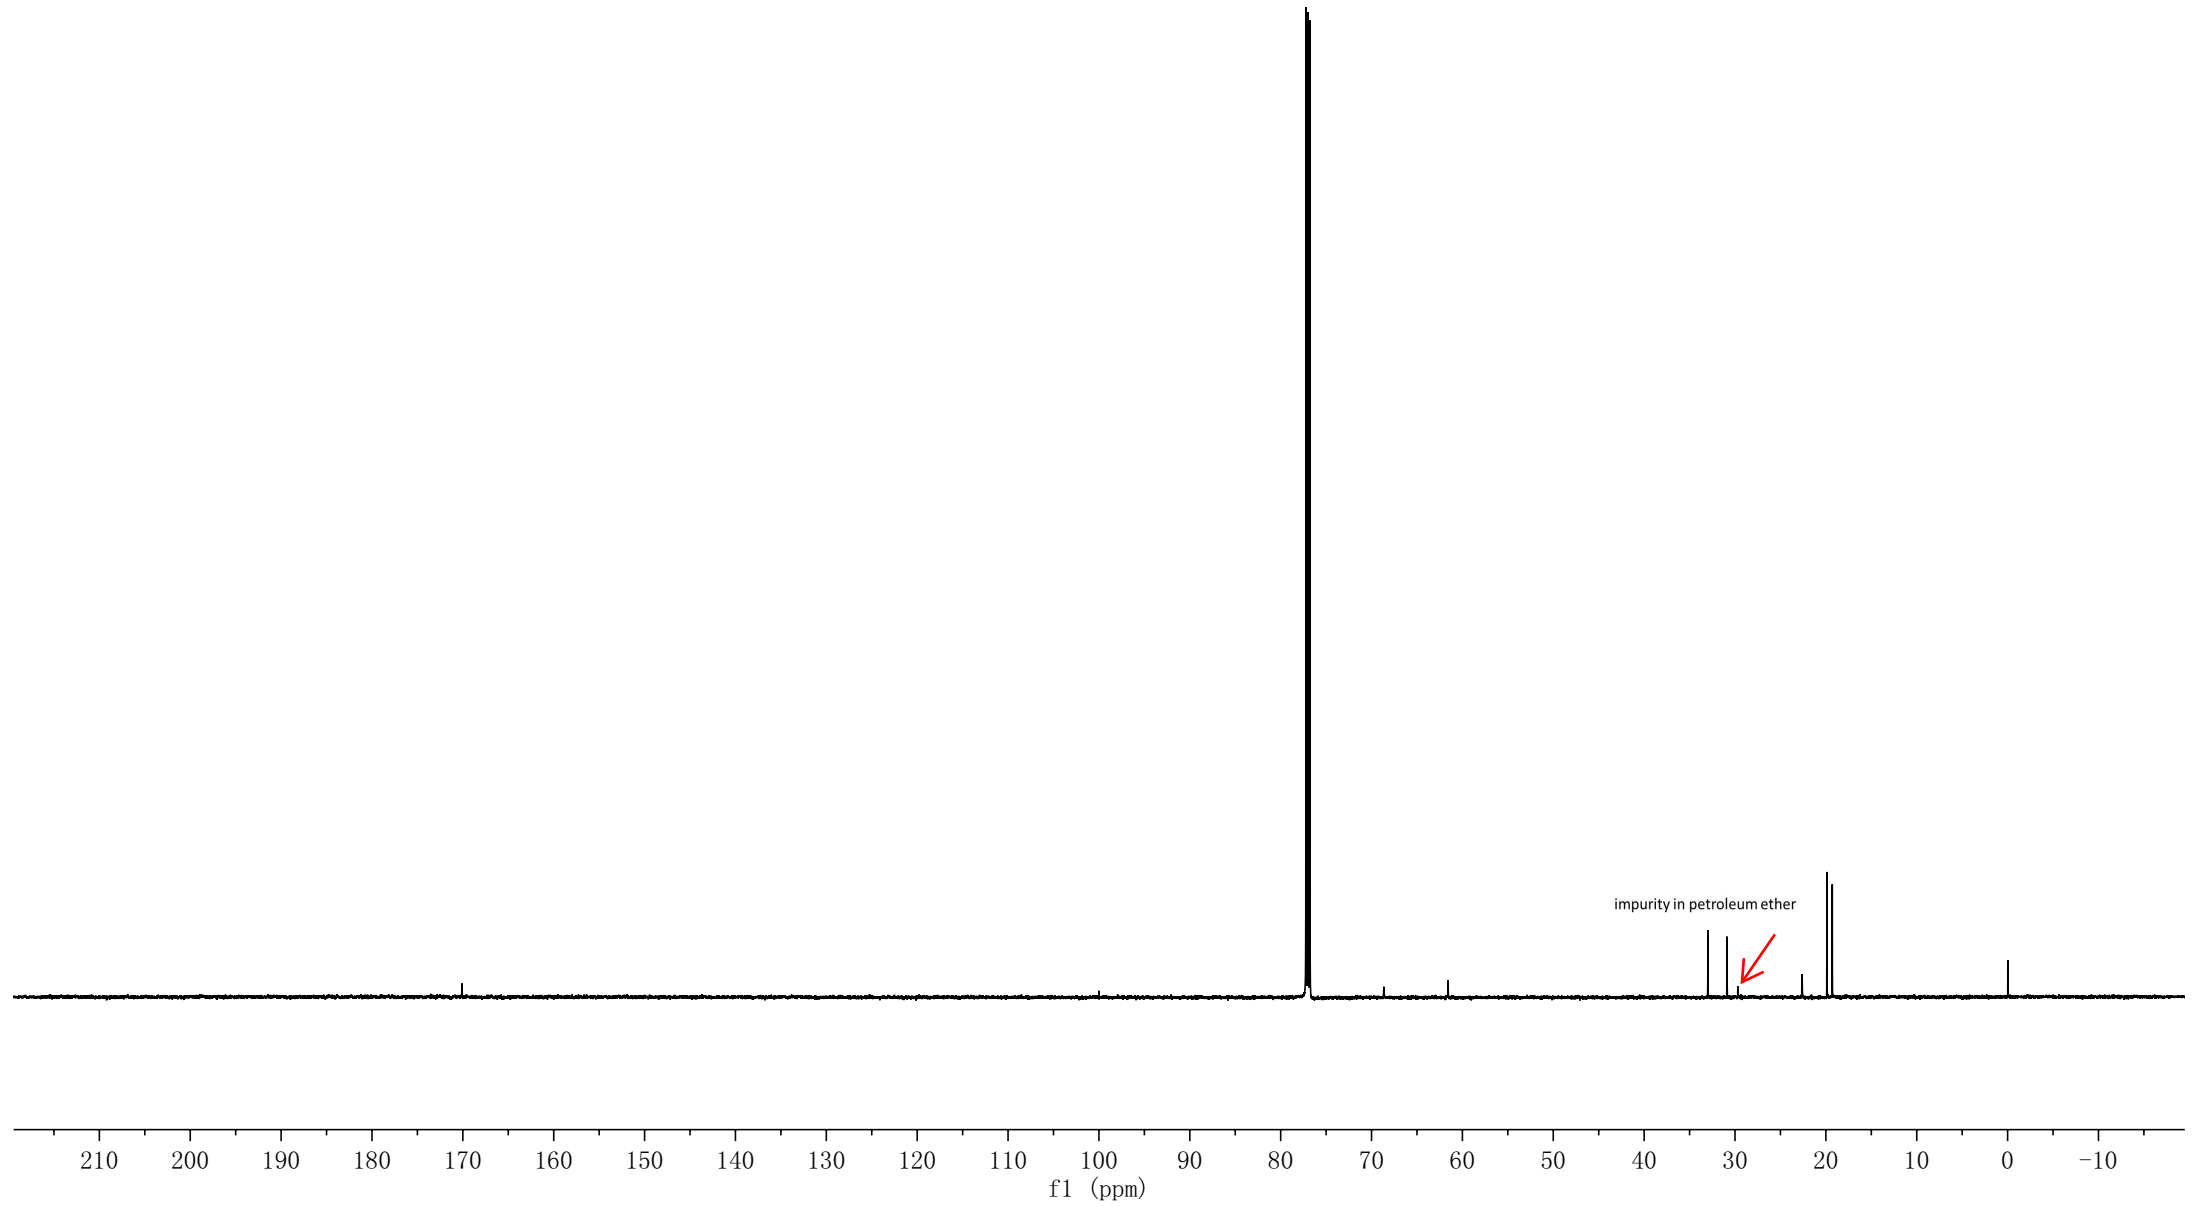

XT-404-B9-B {H}

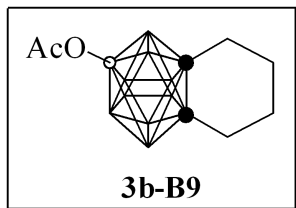

—8.83

—6.31

~9.87

~10.46

~11.93

—13.73

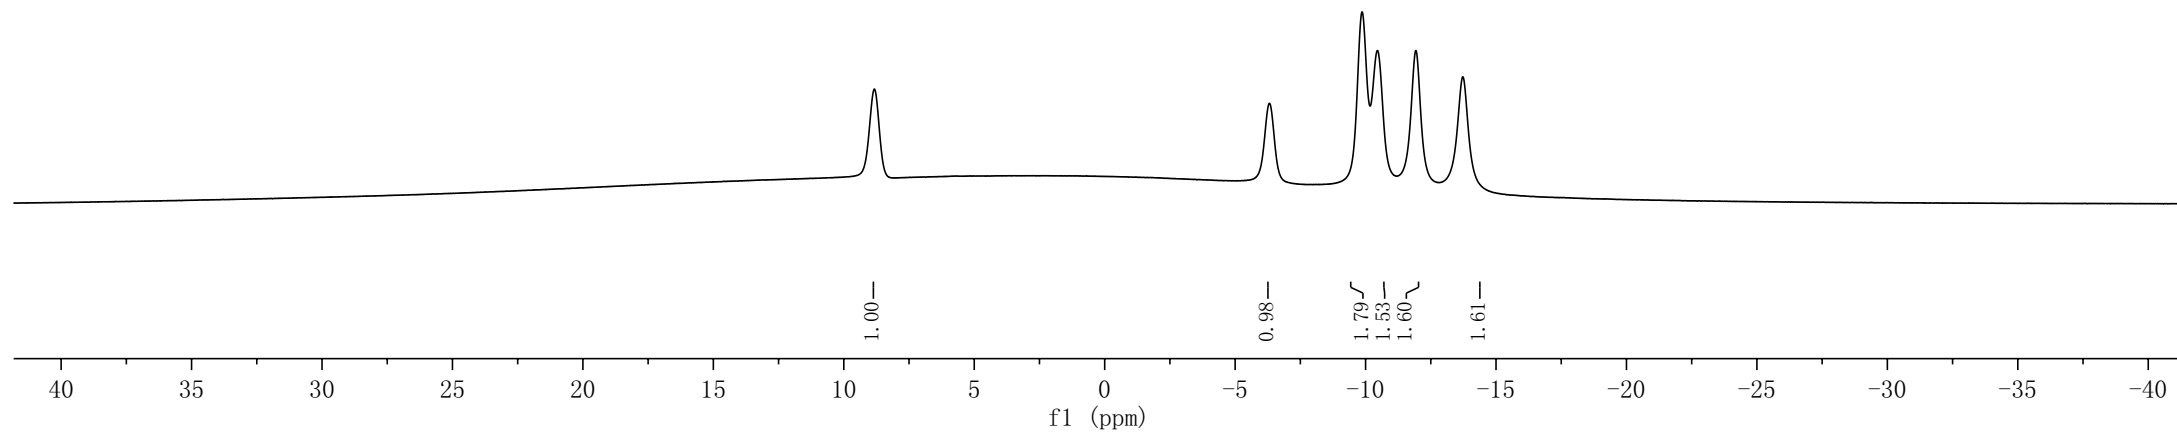

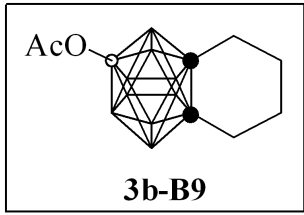

—8.82

—5.94  
—6.71  
—9.48  
—10.19  
—10.90  
—11.50  
—12.36  
—13.28  
—14.19

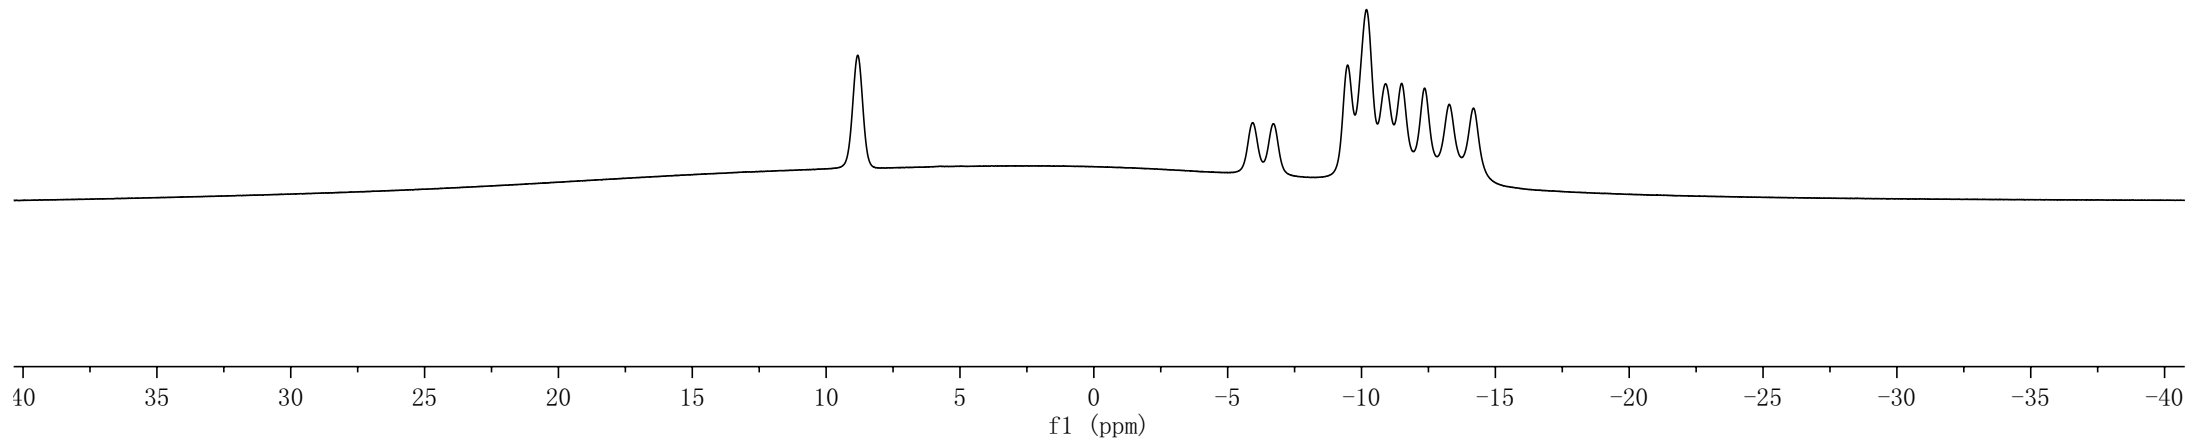

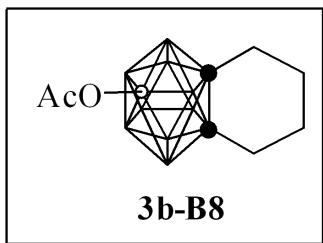

— 7.26

2.44  
2.44  
2.44  
2.43  
2.43  
— 2.09

1.59  
1.59  
1.58

— -0.01

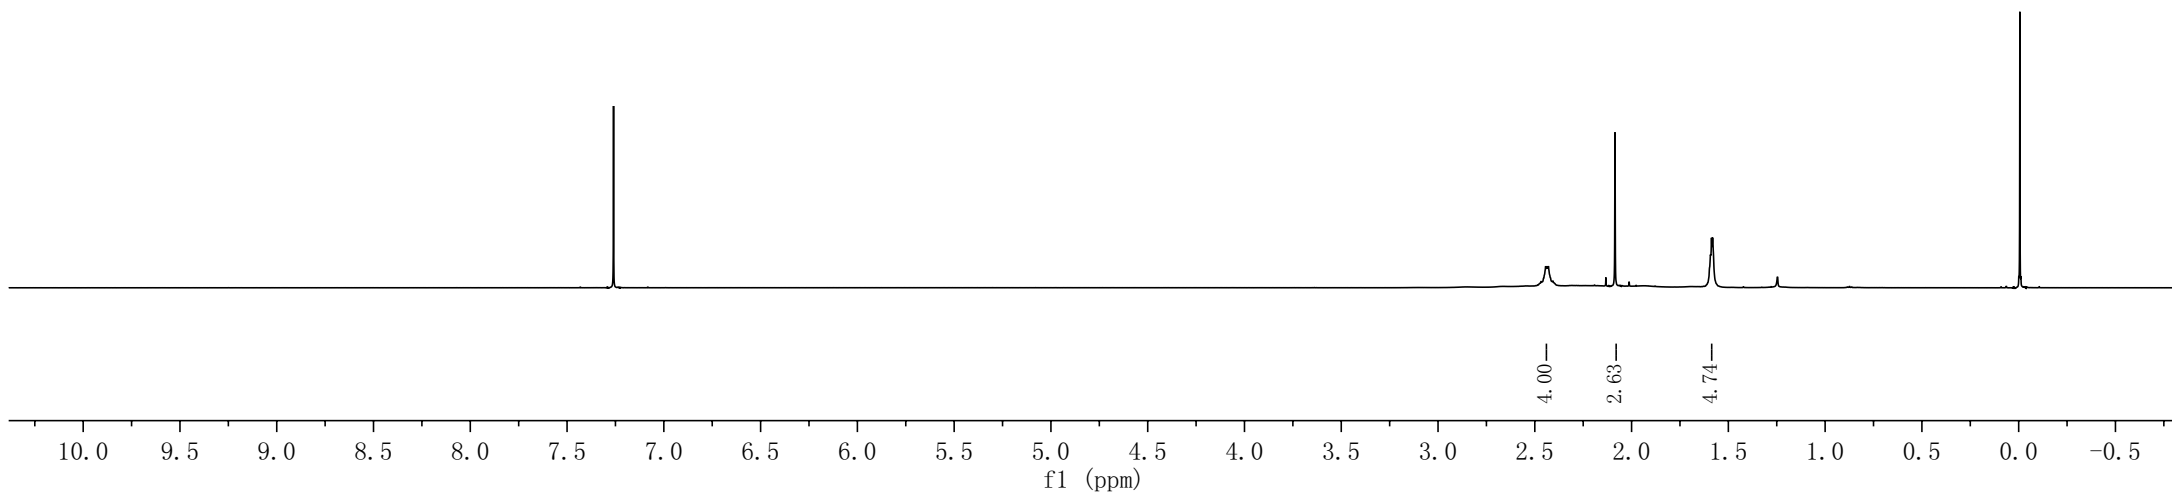

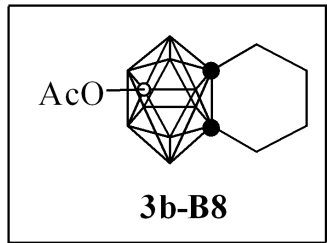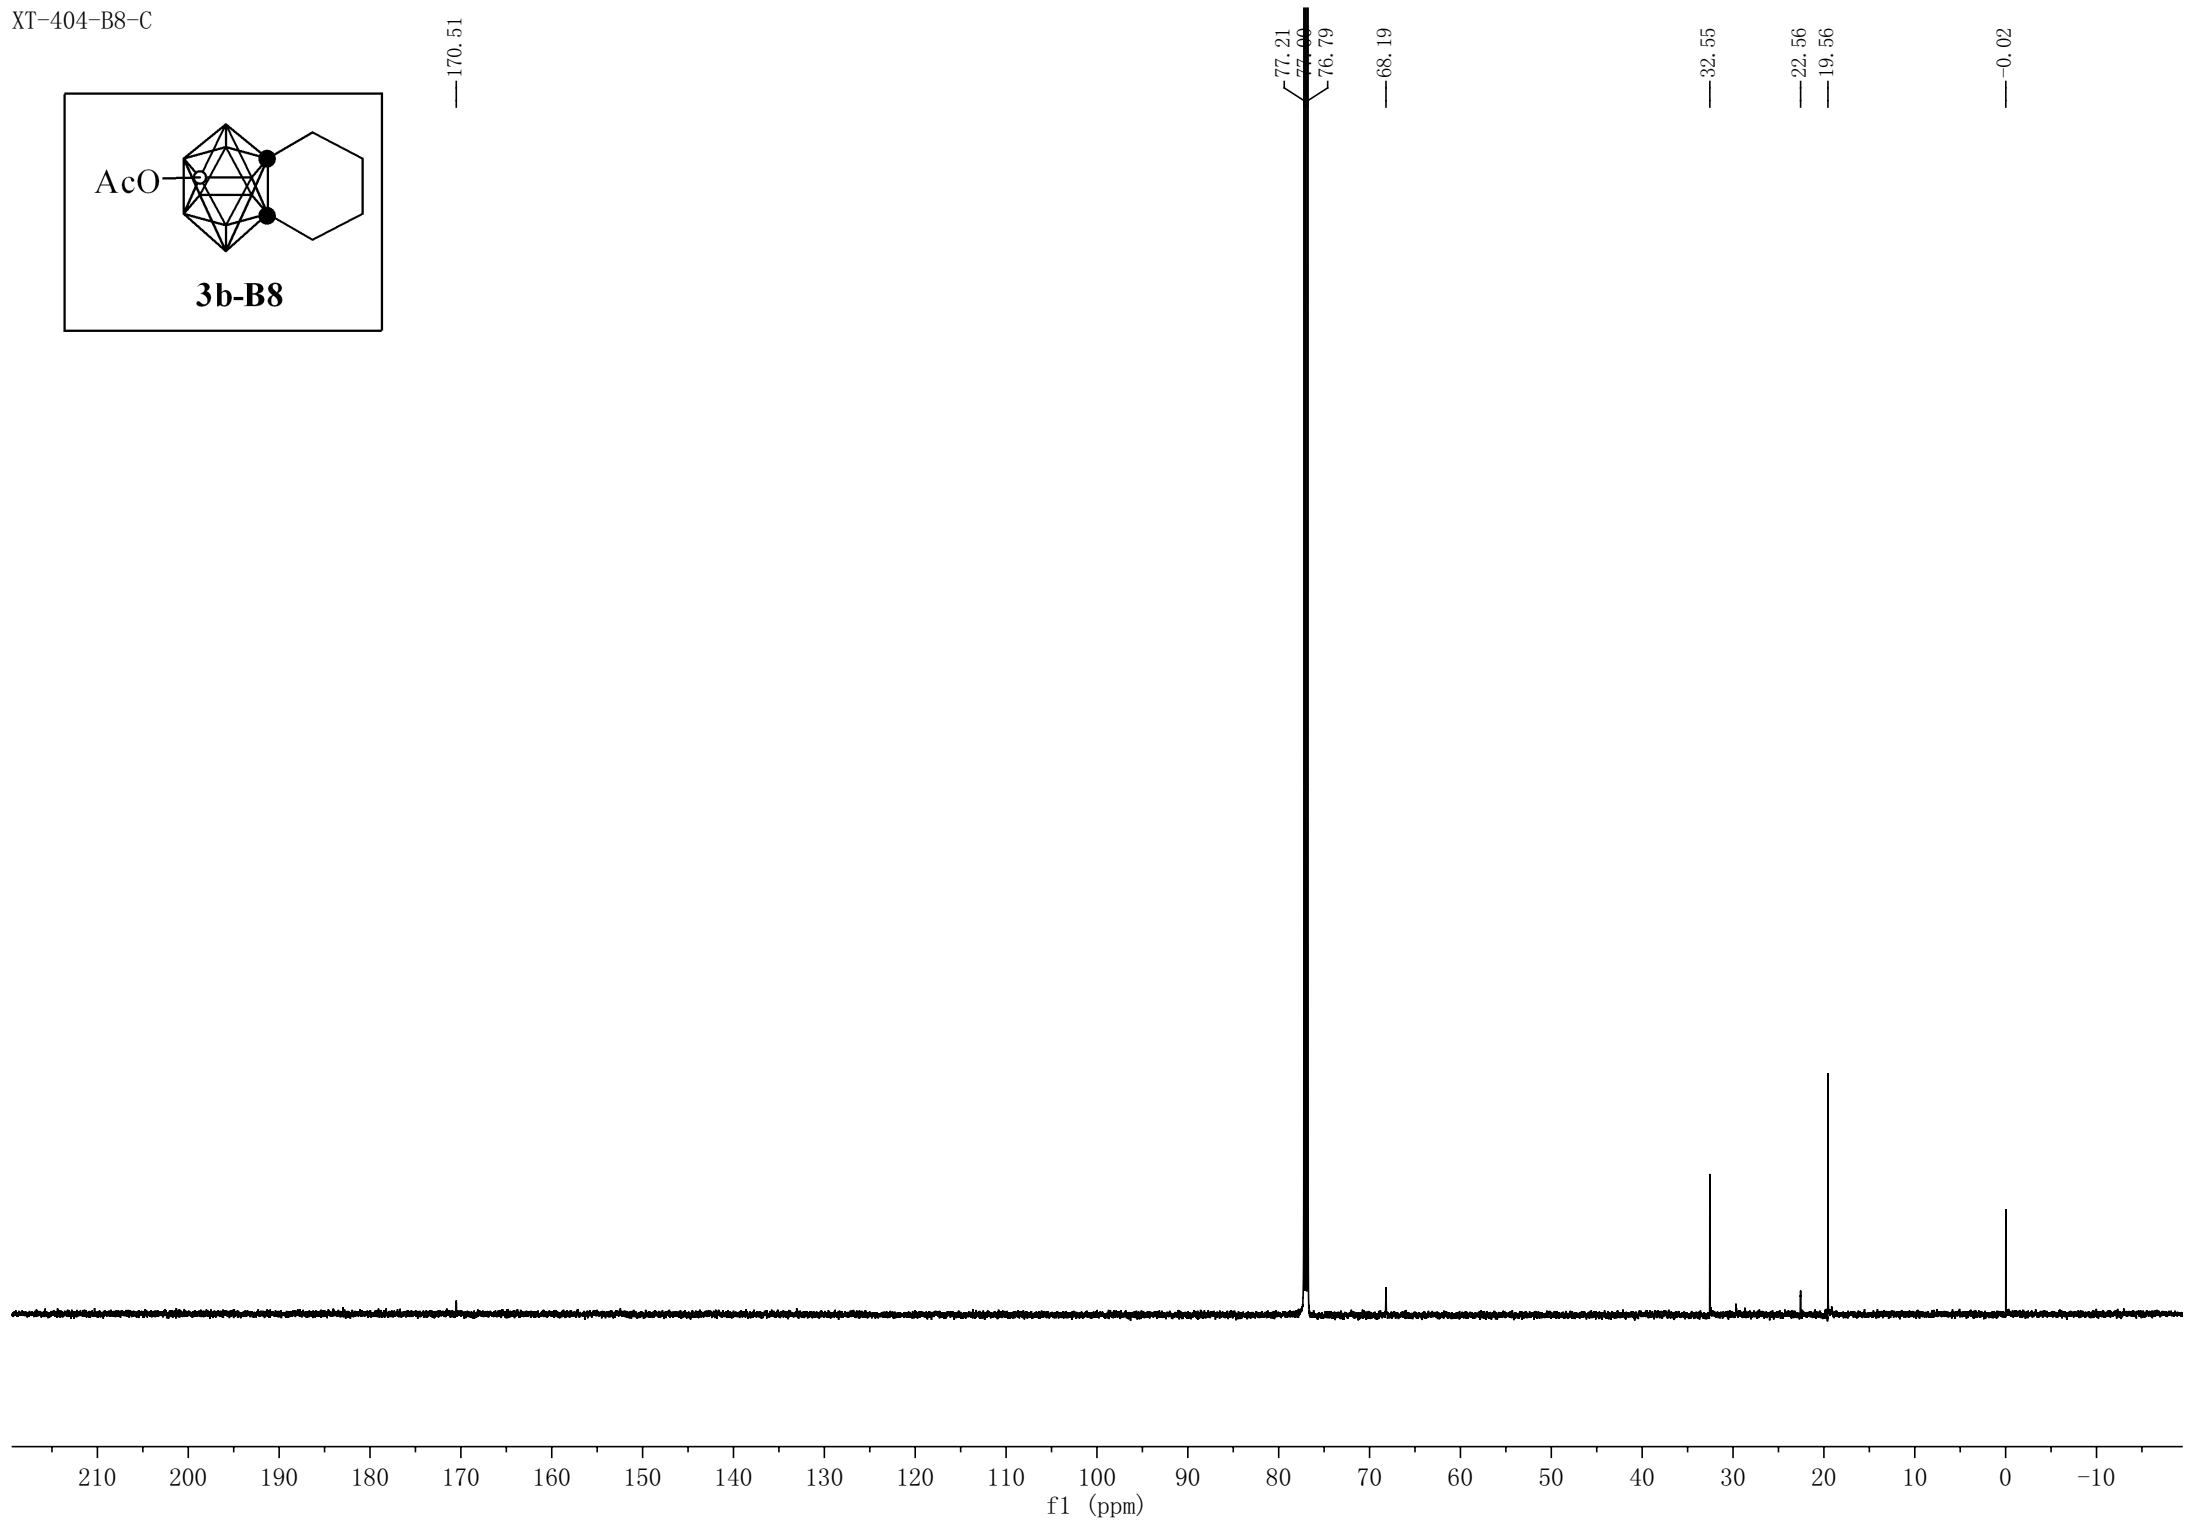

XT-404-B8-B {H}

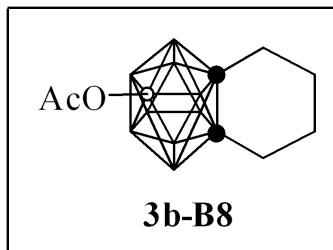

—5.76

—6.18

—10.55

—12.00

—17.71

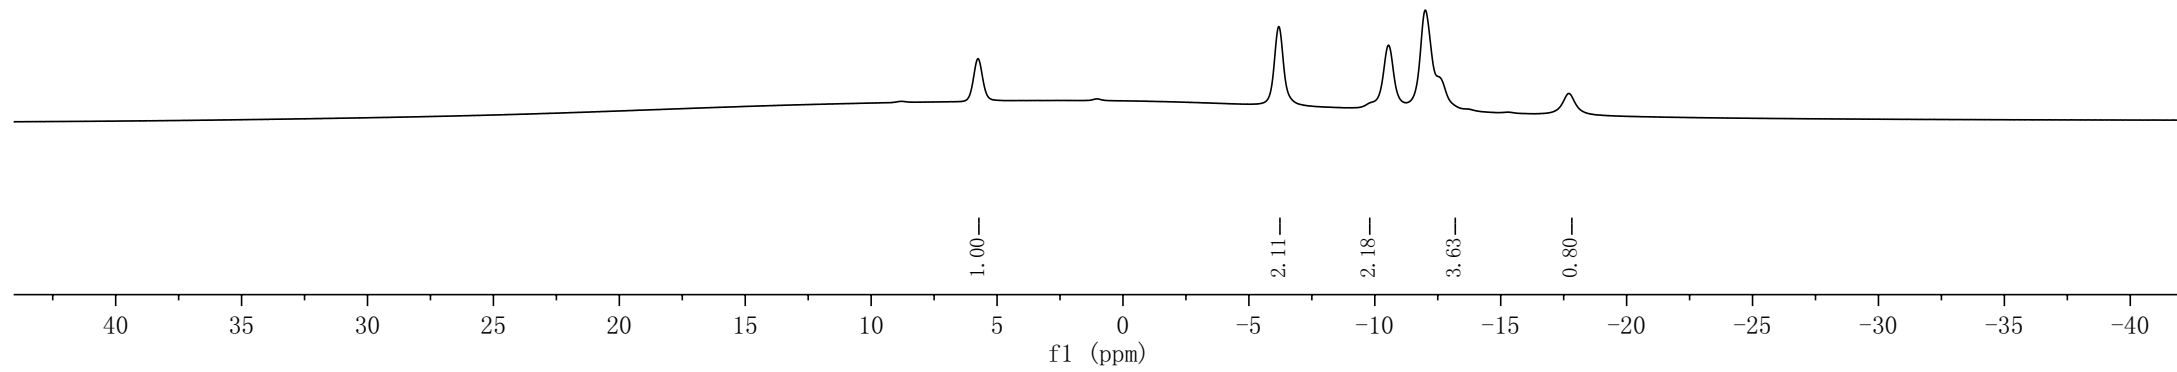

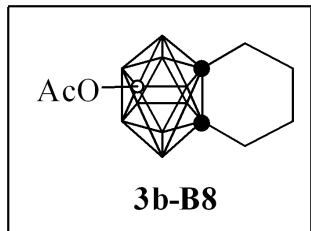

—5.76

—5.81  
—6.59

—10.15  
—11.01  
—11.58  
—12.42

—17.31  
—18.18

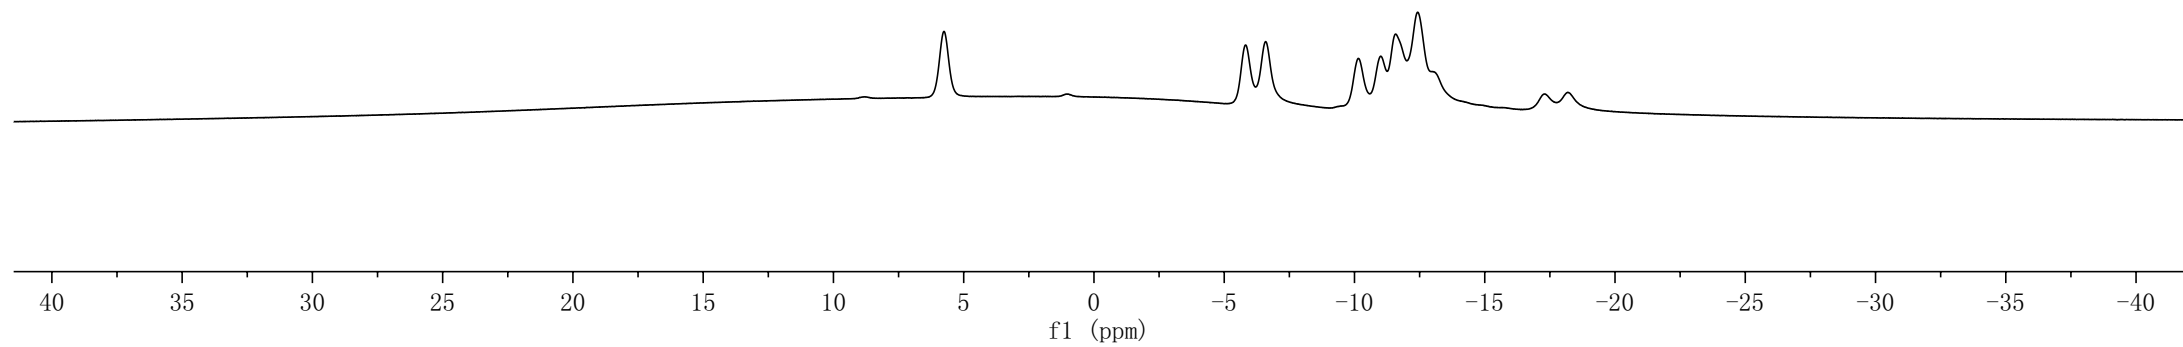



7.26  
7.25  
7.24  
7.24  
7.23  
7.07

3.77  
3.72

2.04

-0.00

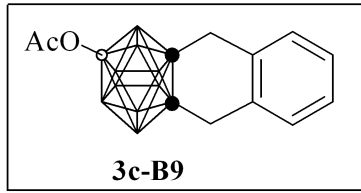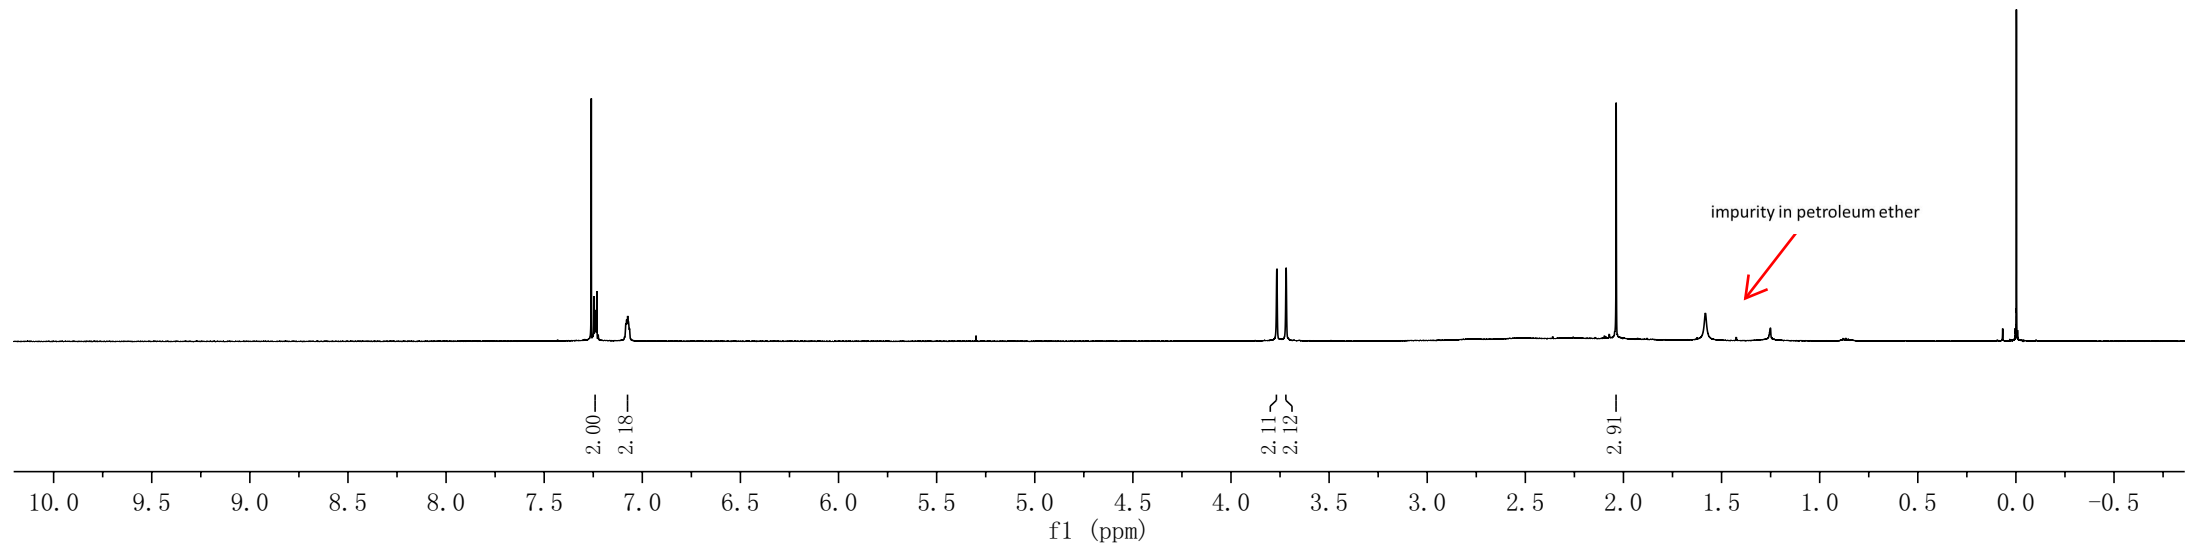

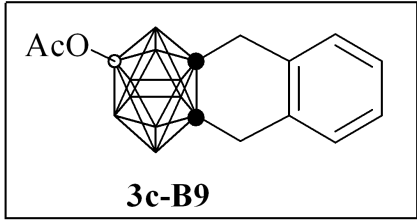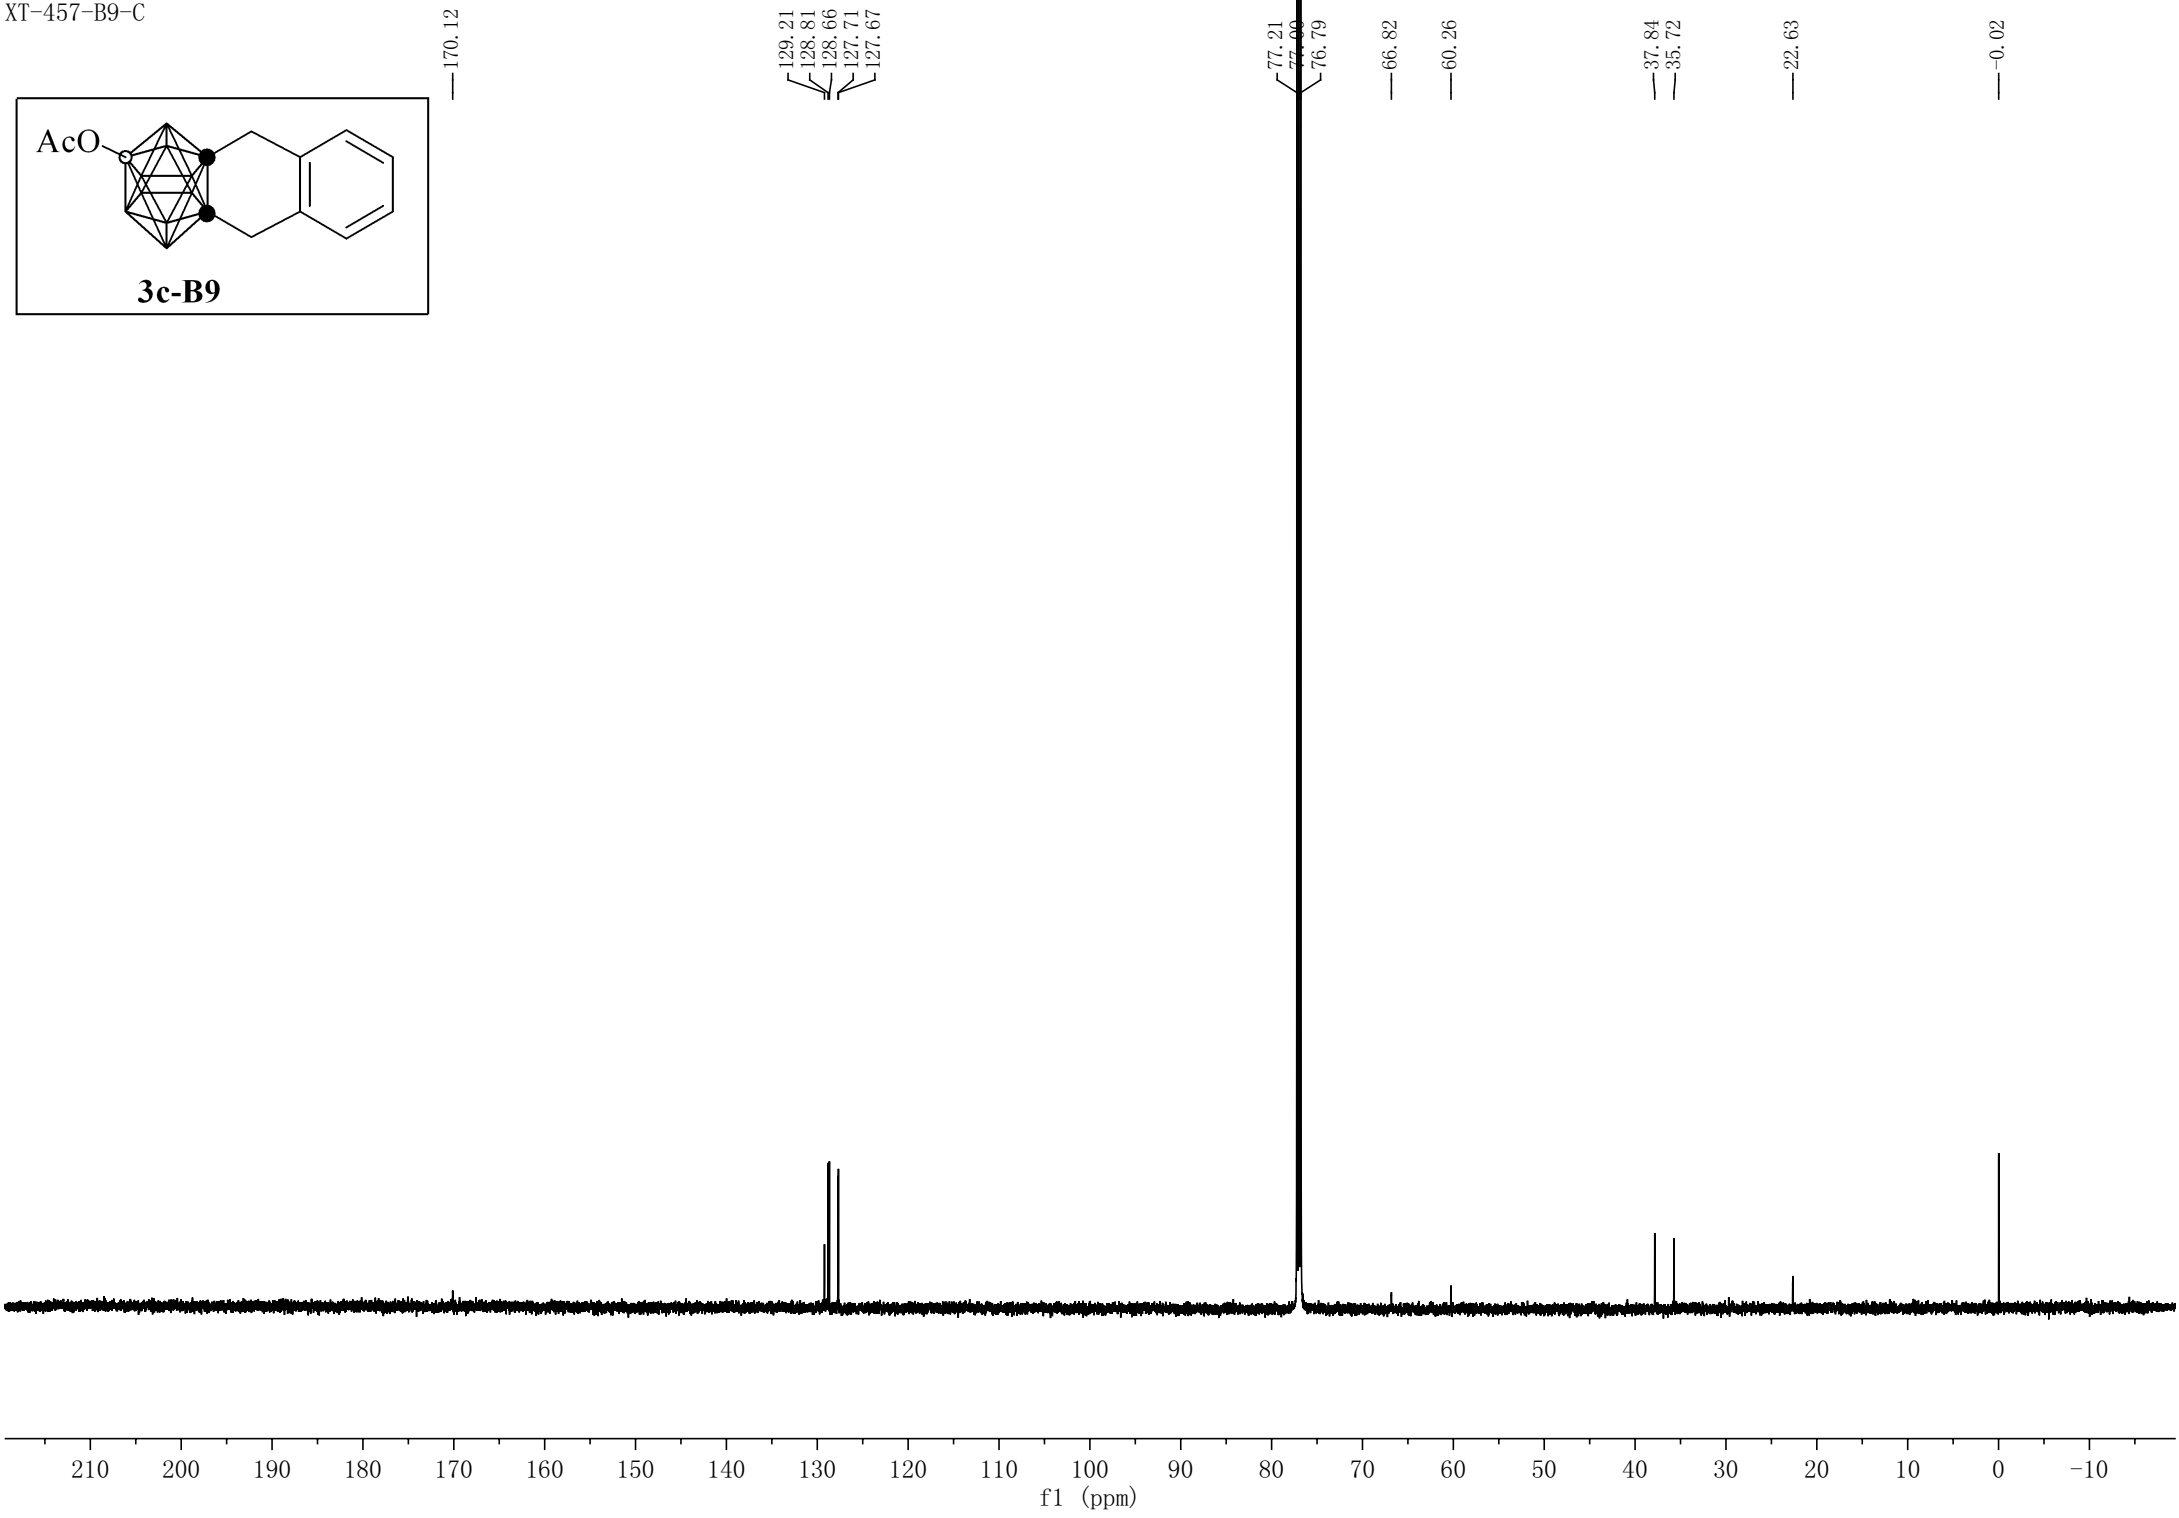

XT-457-B9-B {H}

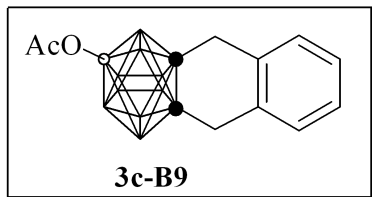

— 9.31

— 5.72

— 10.34

— 11.85

— 12.59

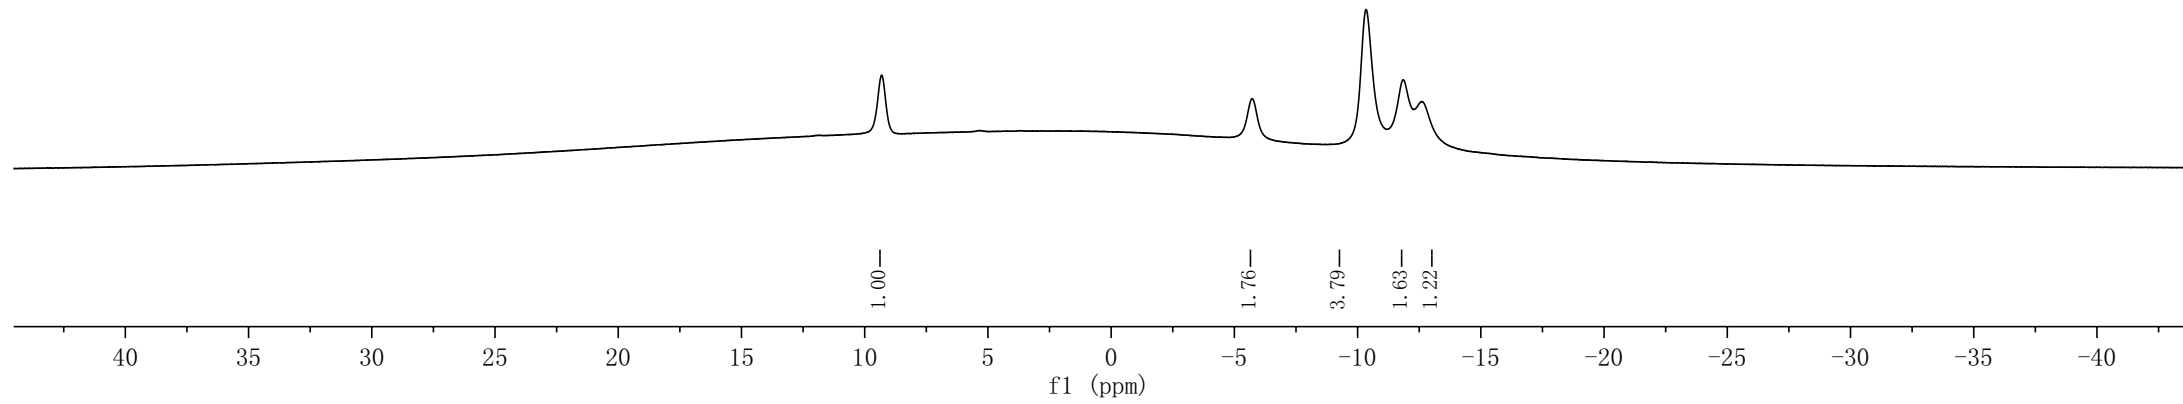

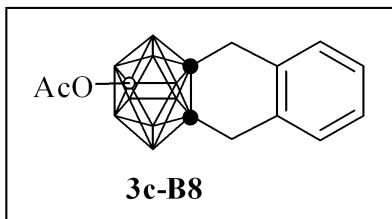

7.26  
7.24  
7.23  
7.22  
7.06  
7.05  
7.05

3.72  
3.71

2.07

1.58

0.00

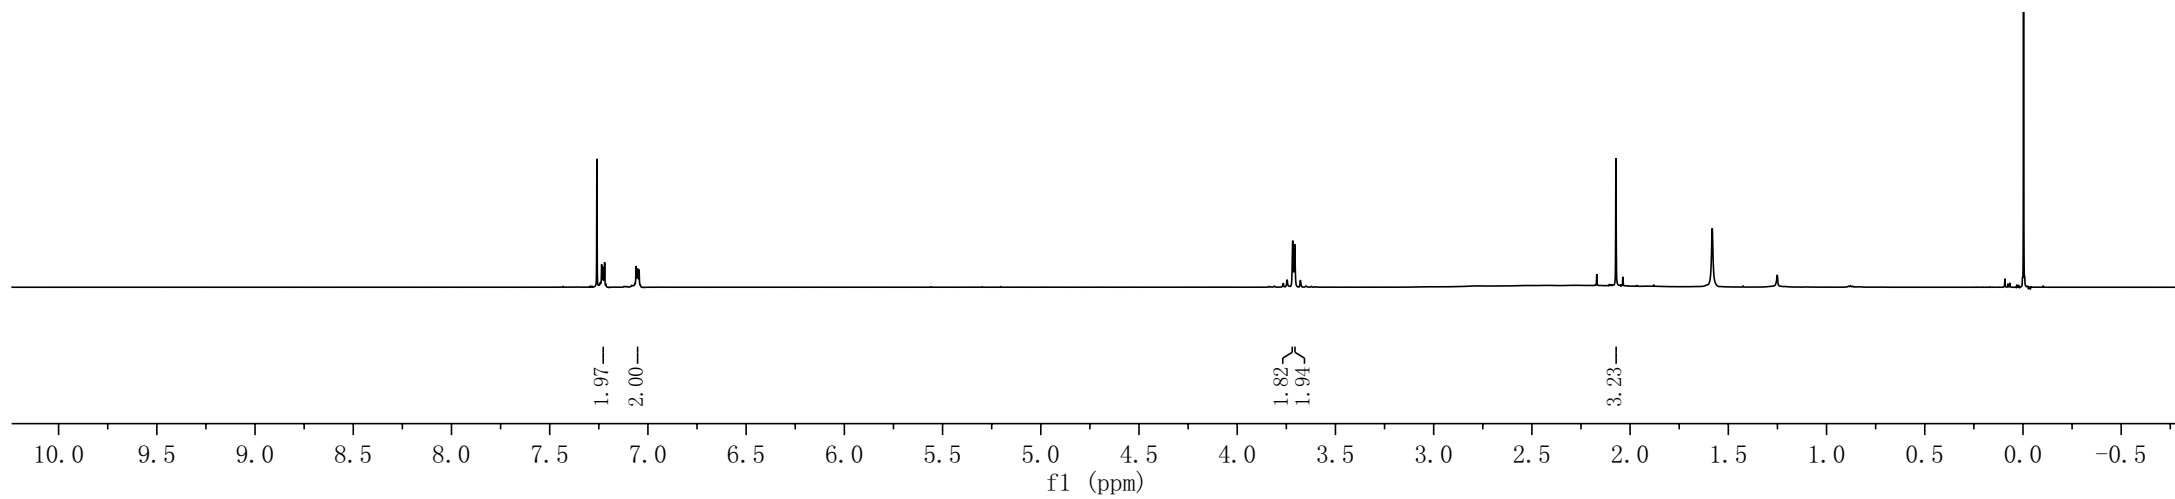

XT-457-B8-C

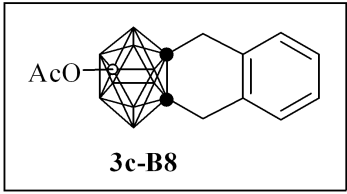

—170.44

128.83  
128.65  
127.64

77.21  
77.00  
76.79

—66.39

—37.31

—22.51

—0.01

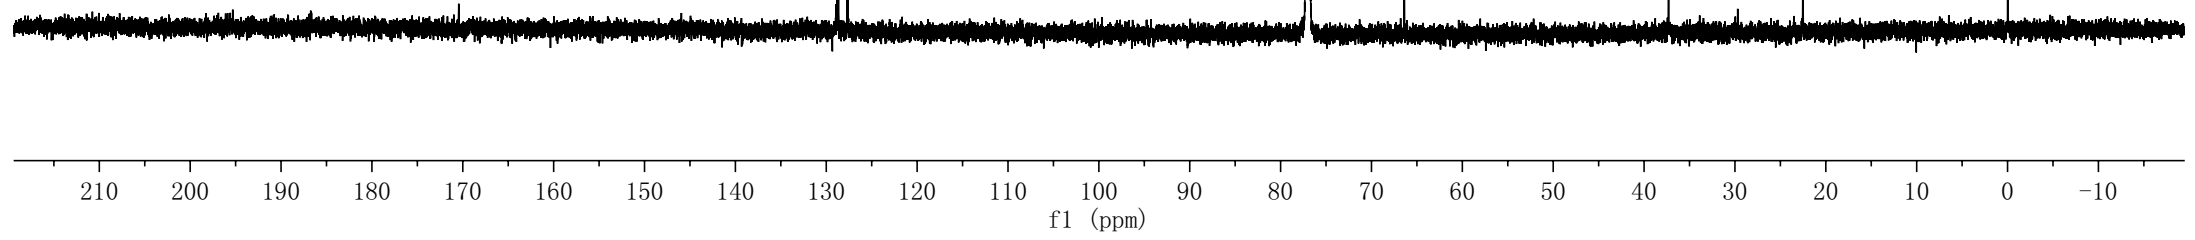

XT-457-B8-B {H}

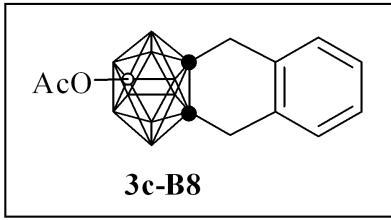

—5.34

—5.74

—10.57

—11.94

—12.65

—16.81

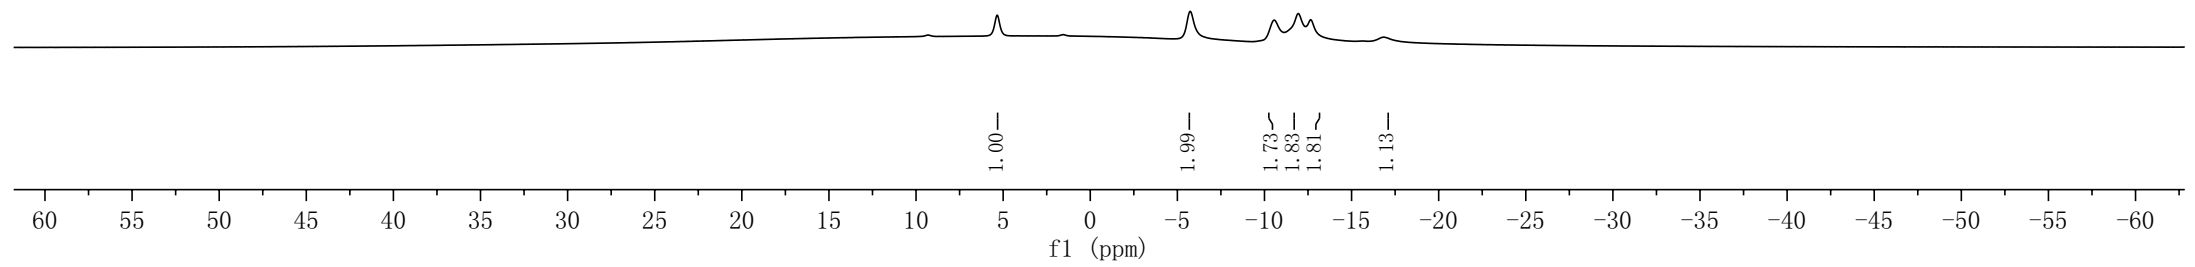

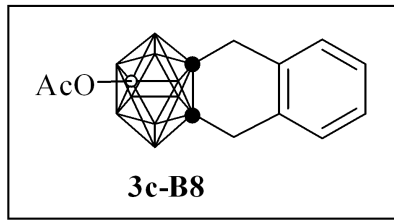

—5.35

\-5.34  
 \-6.12  
 \-10.13  
 \-11.02  
 \-11.49  
 \-12.31  
 \-13.04  
 \-16.40  
 \-17.26

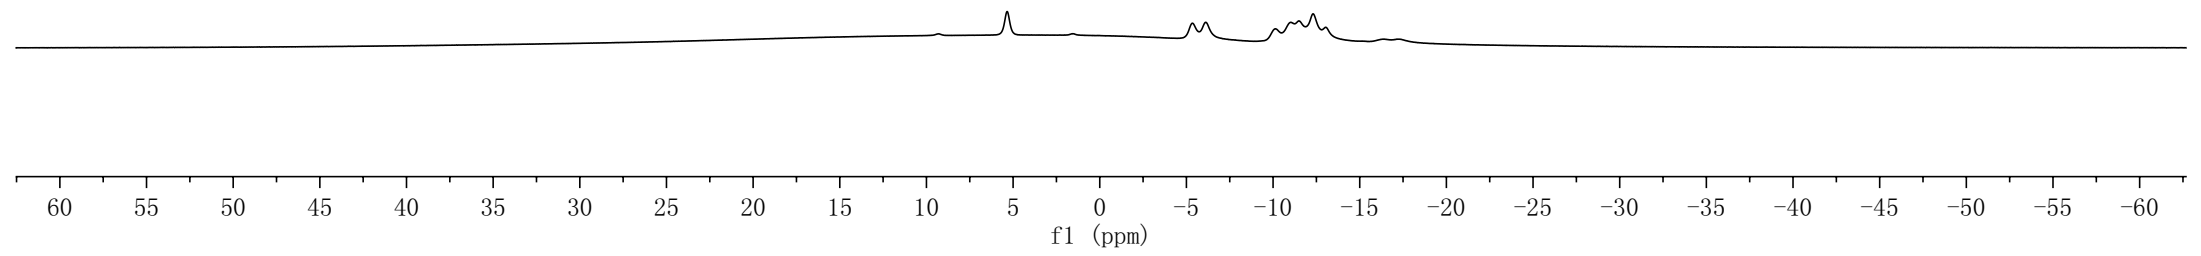

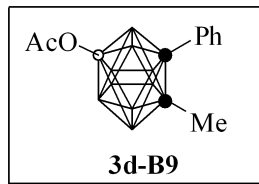

7.64  
7.62  
7.47  
7.46  
7.44  
7.41  
7.39  
7.38  
7.26

— 2.02

— 1.72

— -0.00

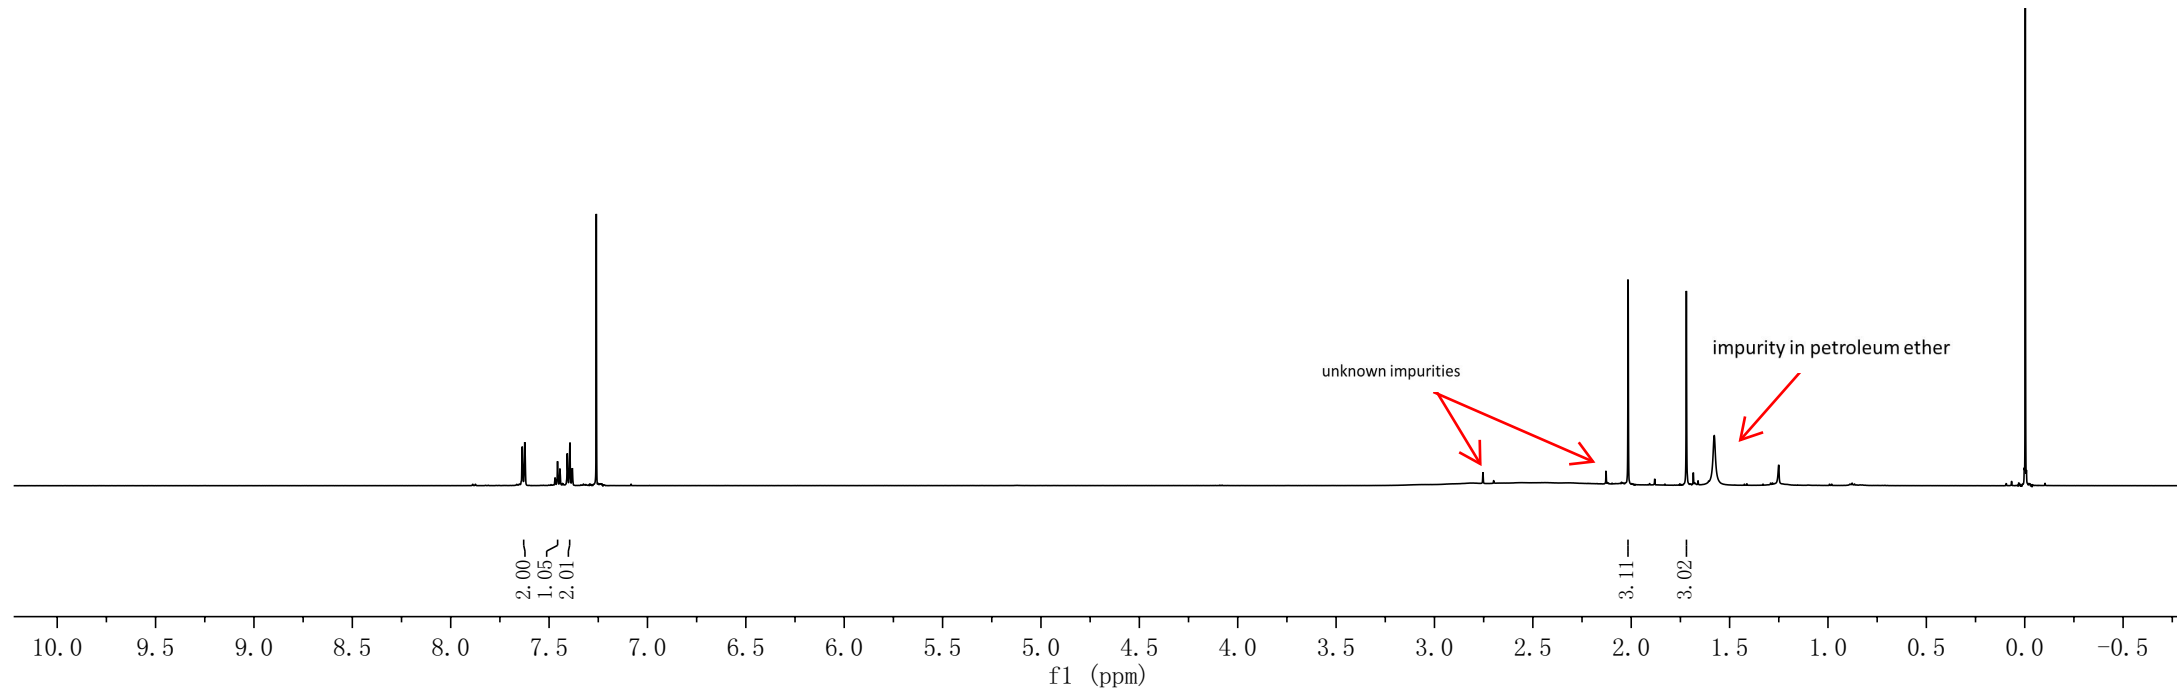



XT-410-B9-C

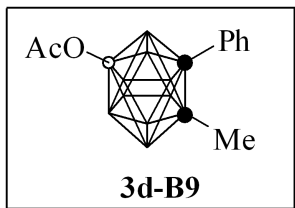

— 170.04

131.04  
130.68  
130.59  
128.92

77.93  
77.21  
77.00  
76.79

— 65.65

22.63  
20.95

— 0.01

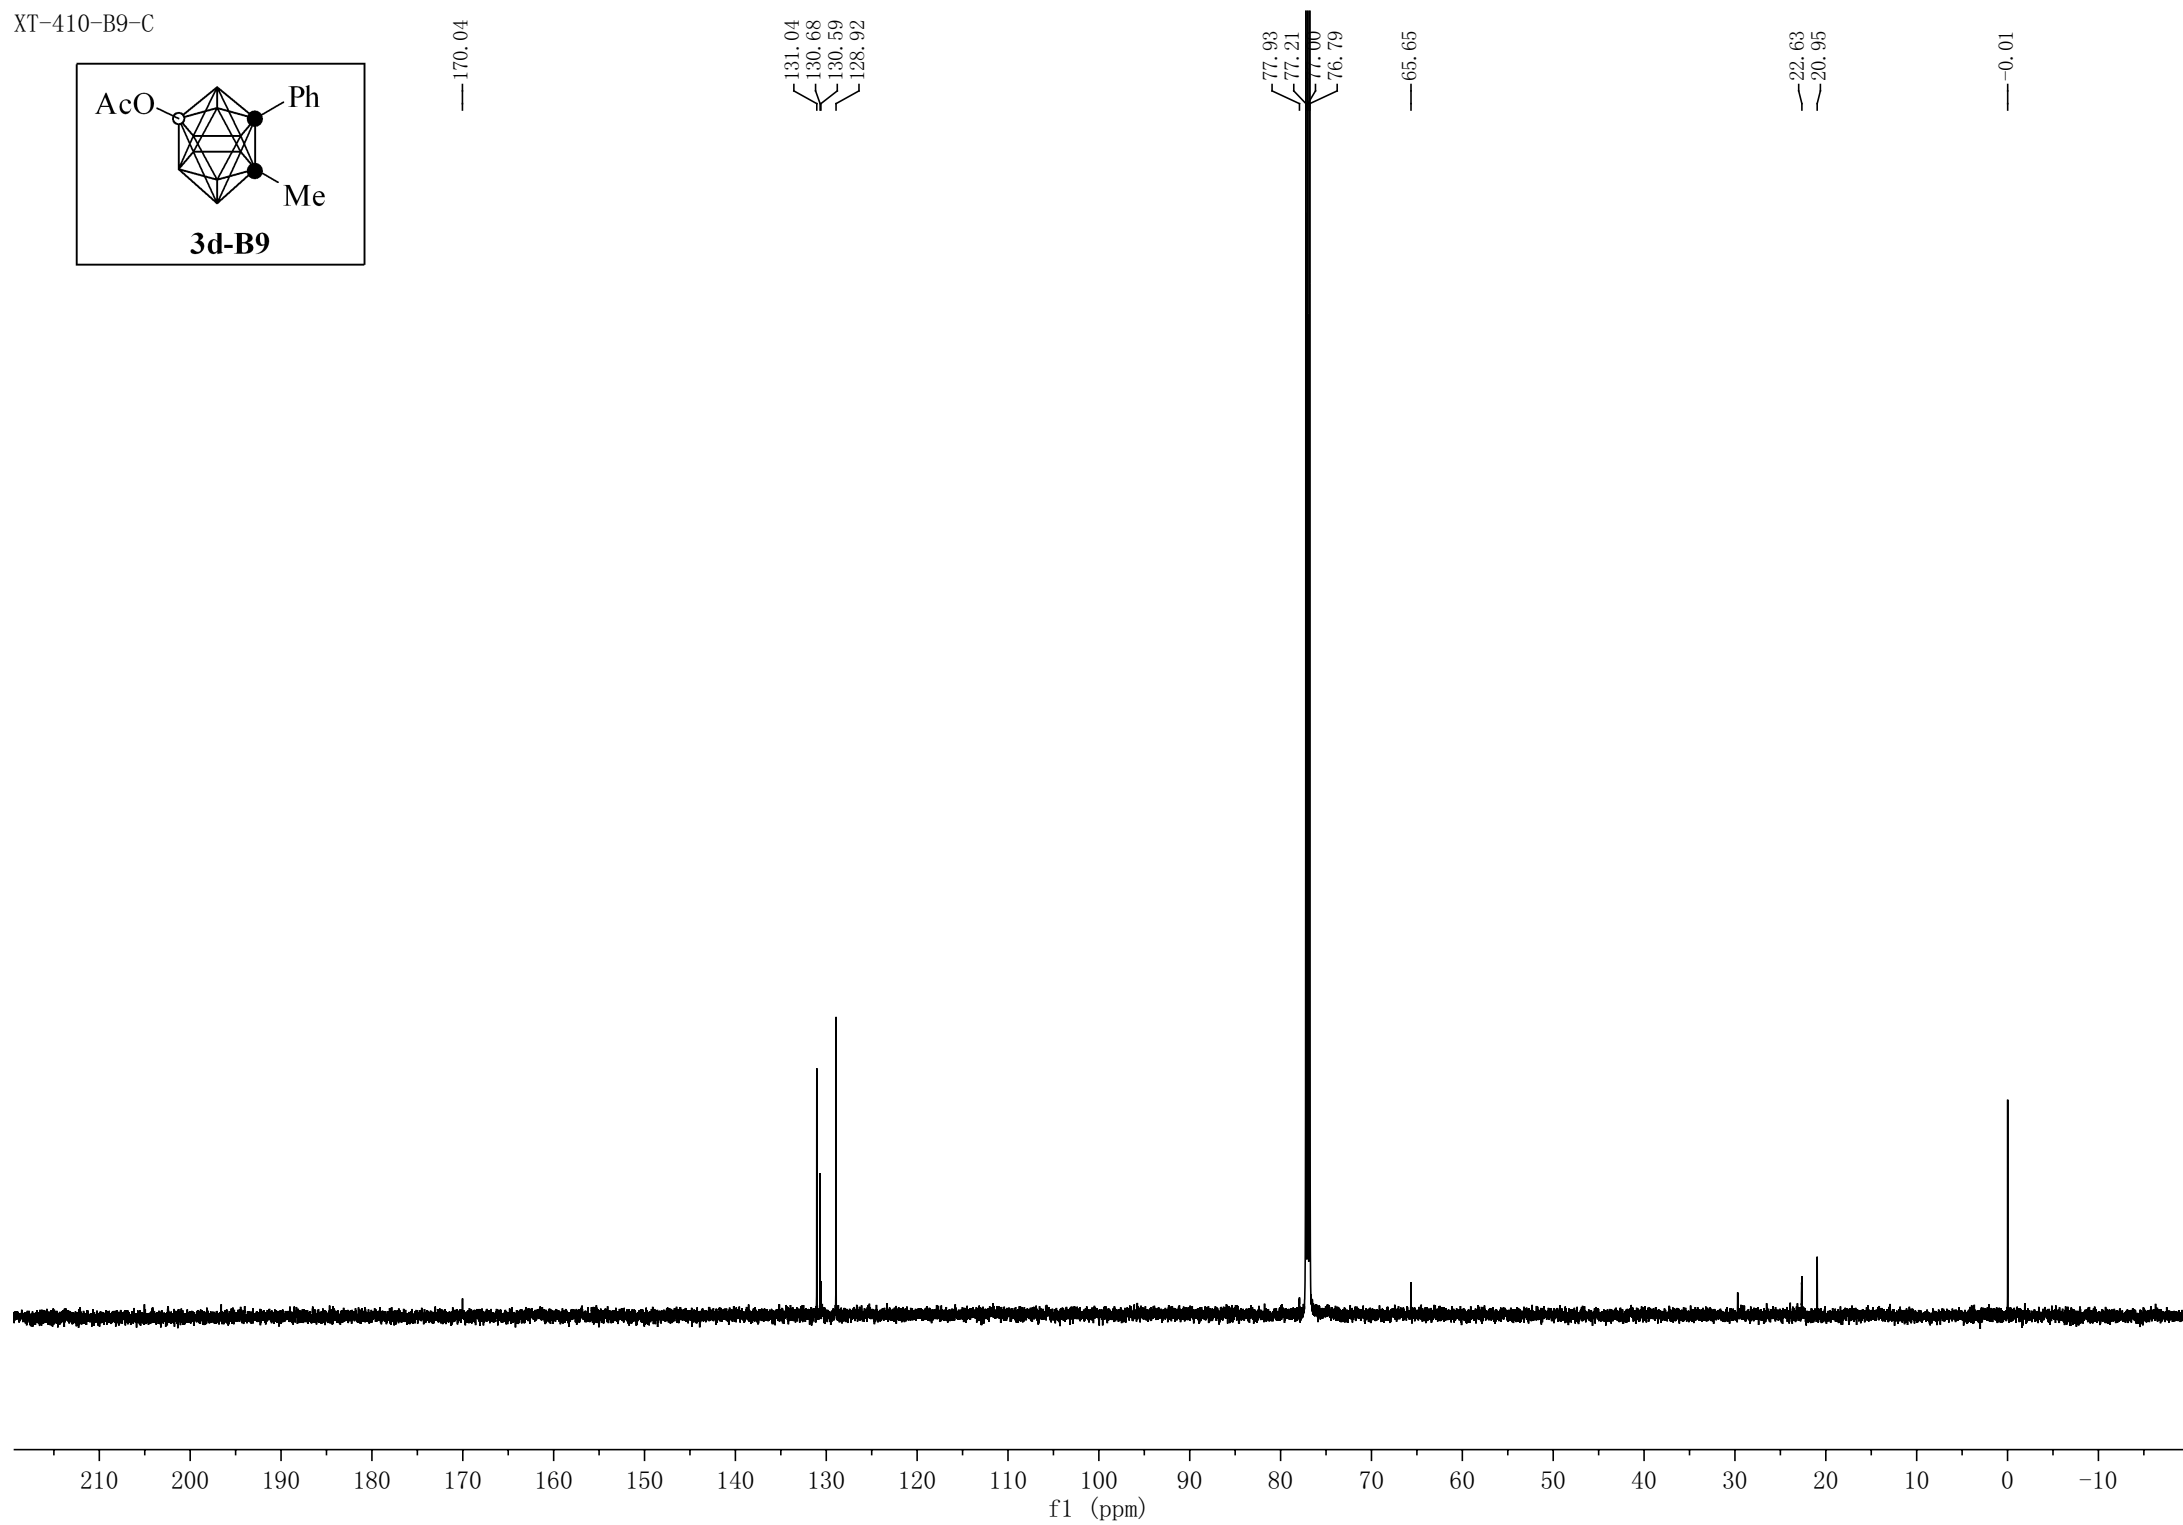

XT-410-B9-B {H}

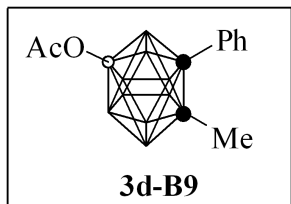

— 10.13

— 3.86

— 10.12  
— 10.79  
— 11.77  
— 12.27

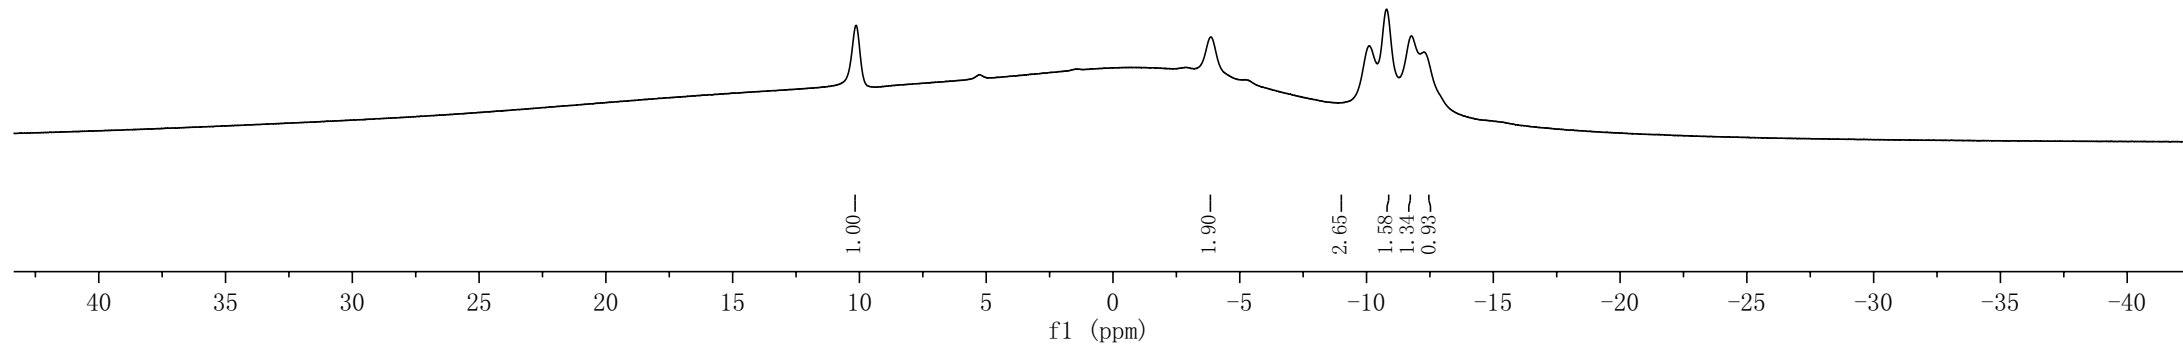

XT-410-B9-B

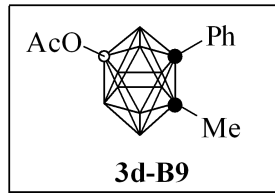

— 10.12

— 3.48  
— 4.26

— 9.68  
— 10.45  
— 11.26  
— 12.12  
— 12.75

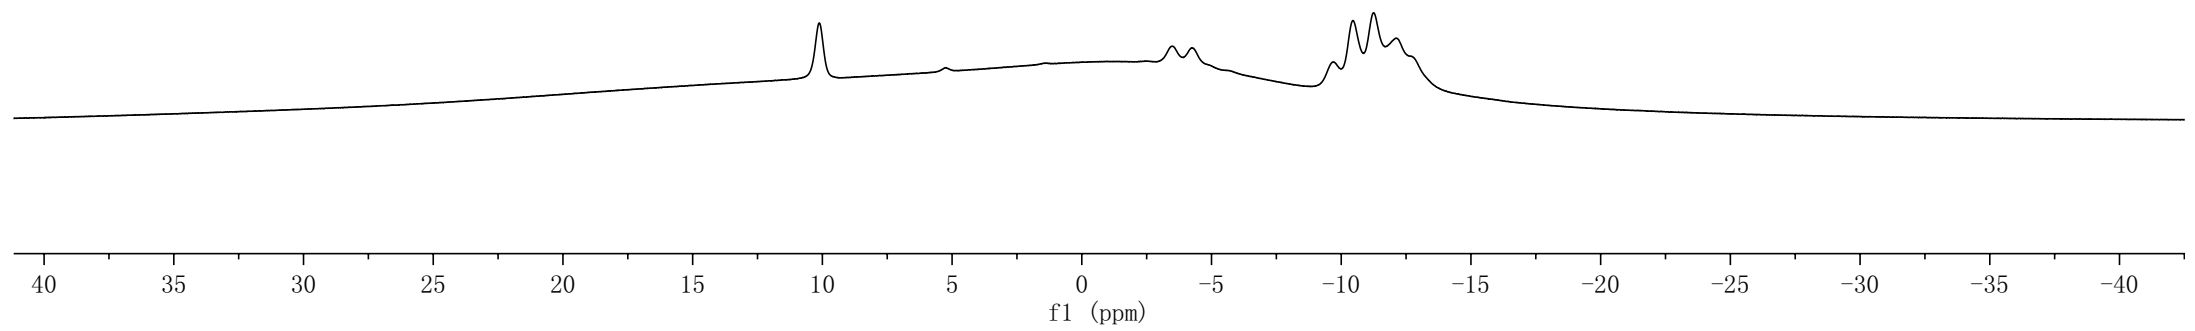

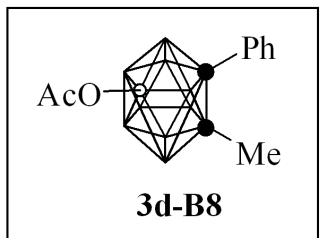

7.69  
7.68  
7.47  
7.46  
7.45  
7.41  
7.39  
7.38  
7.26

—2.12

—1.70

—0.00

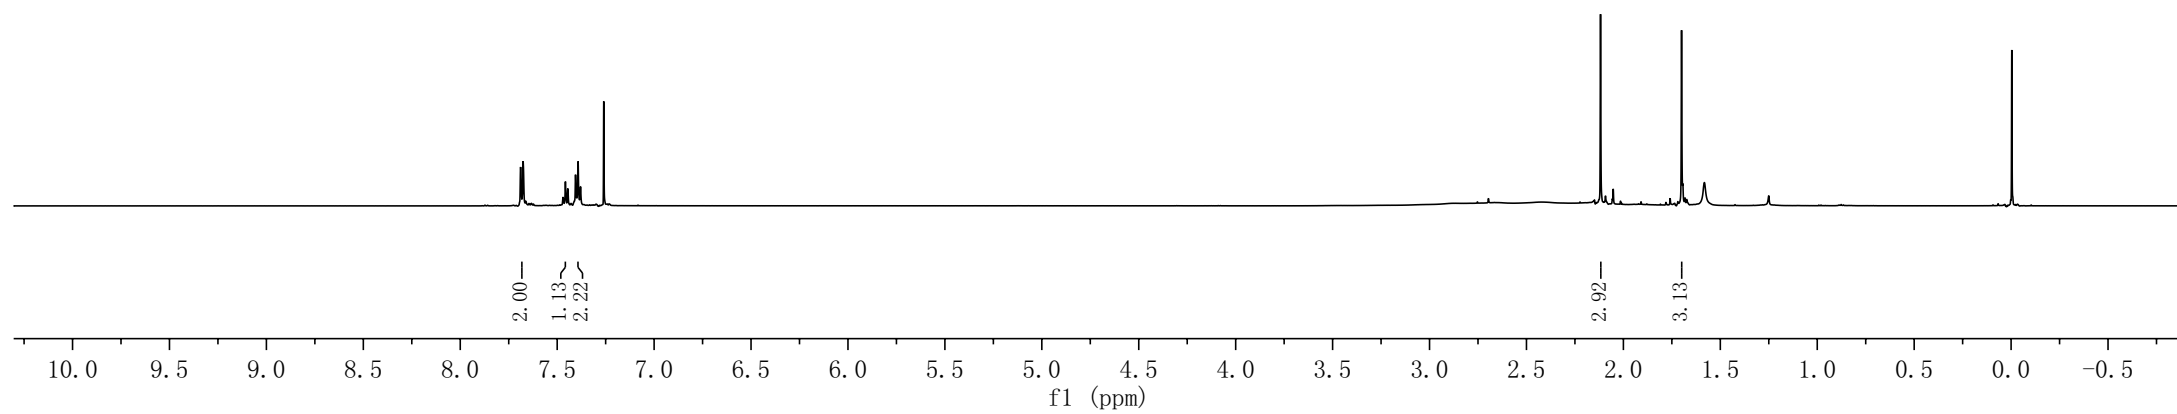

XT-410-B8-C

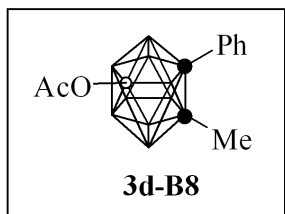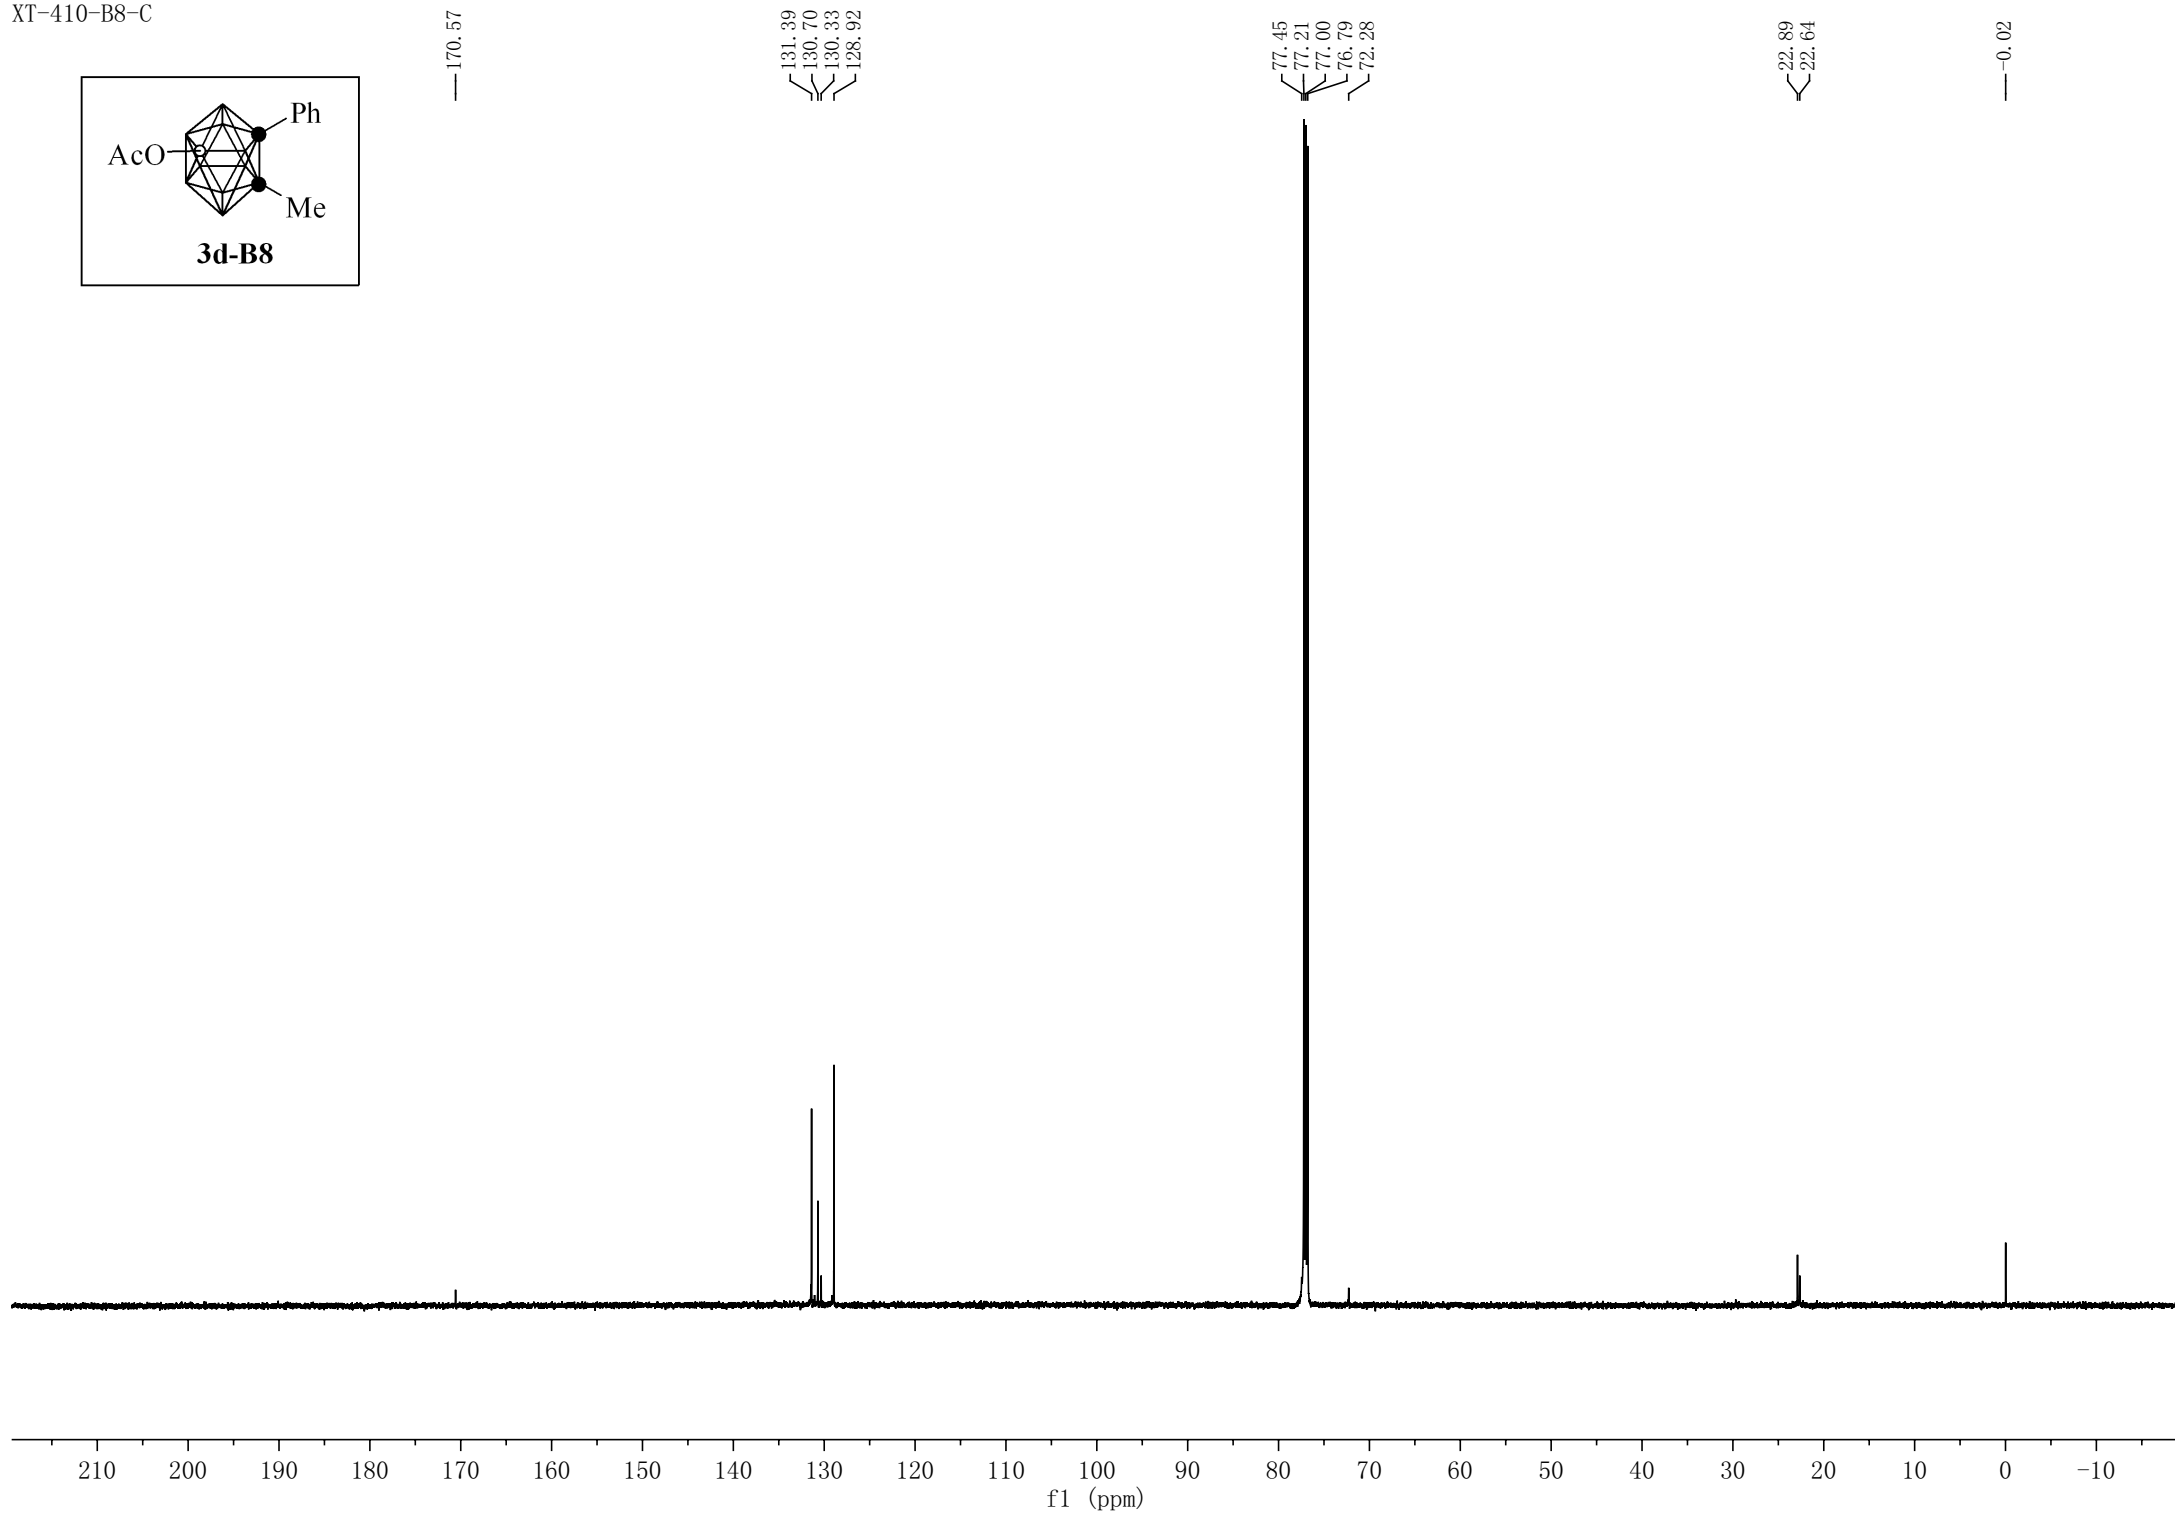

XT-410-B8-B {H}

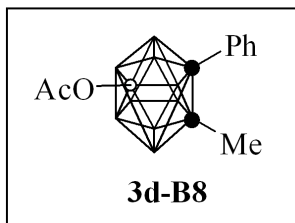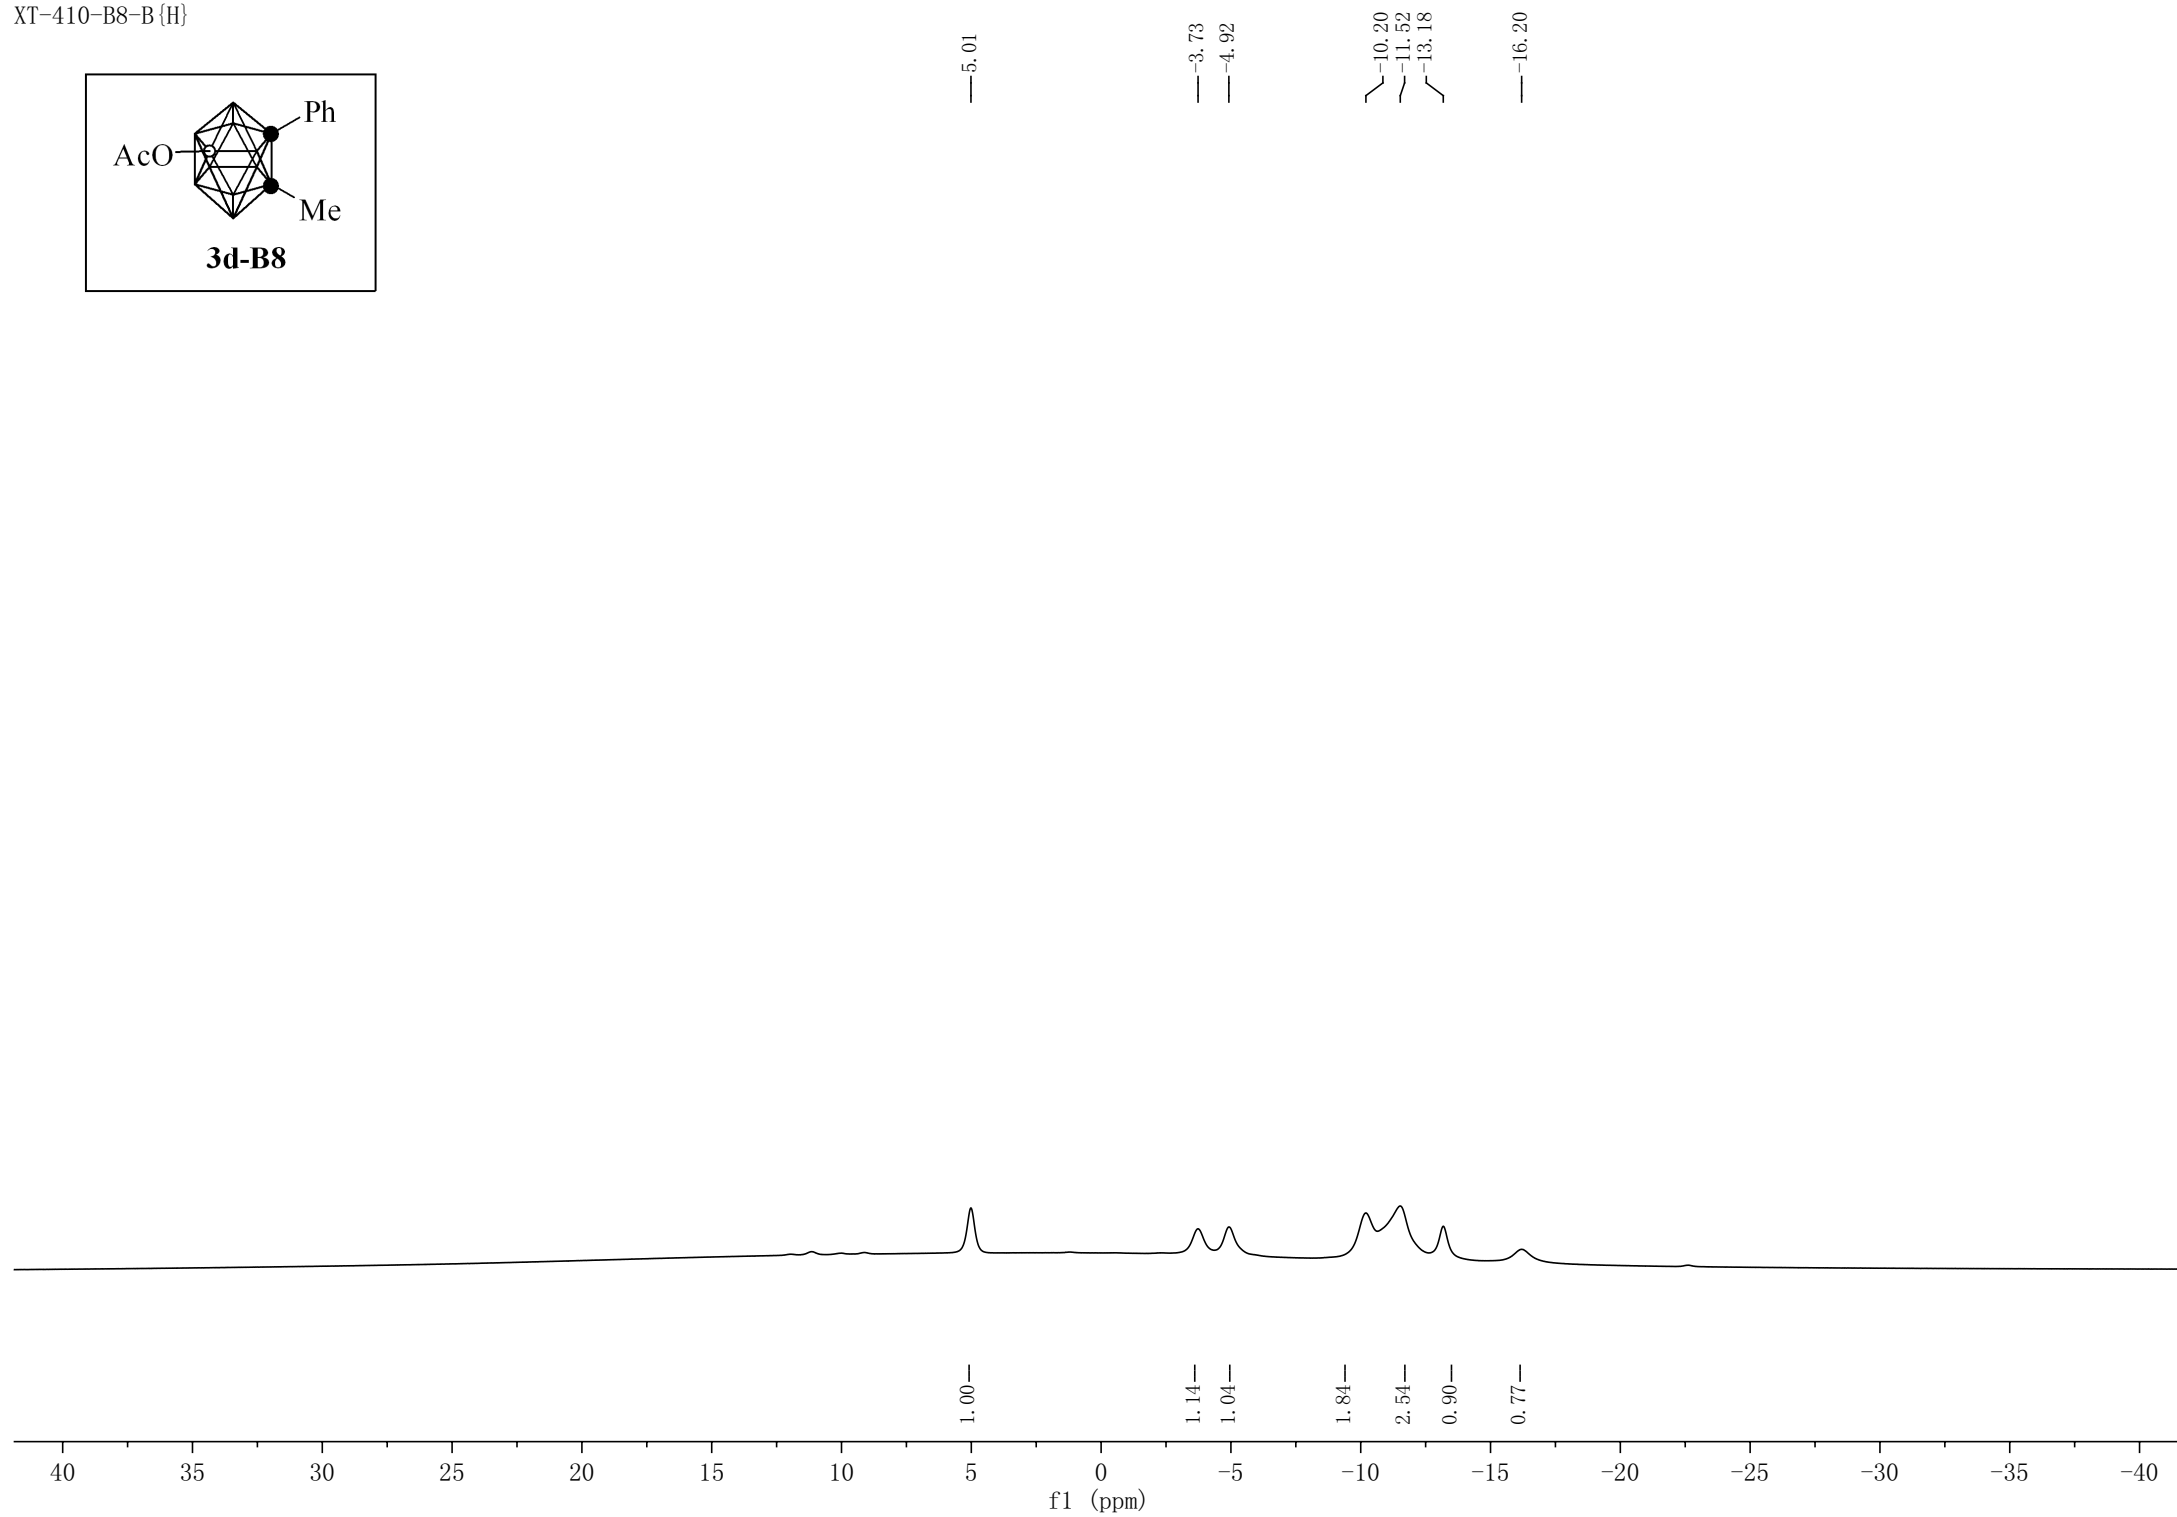

XT-410-B8-B

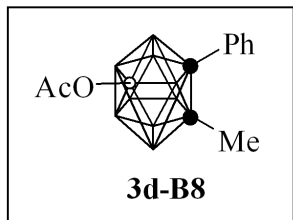

— 5.01

3.35  
4.15  
4.49  
5.32

9.79  
10.69  
11.11  
11.91  
12.78  
13.57

15.80  
16.61

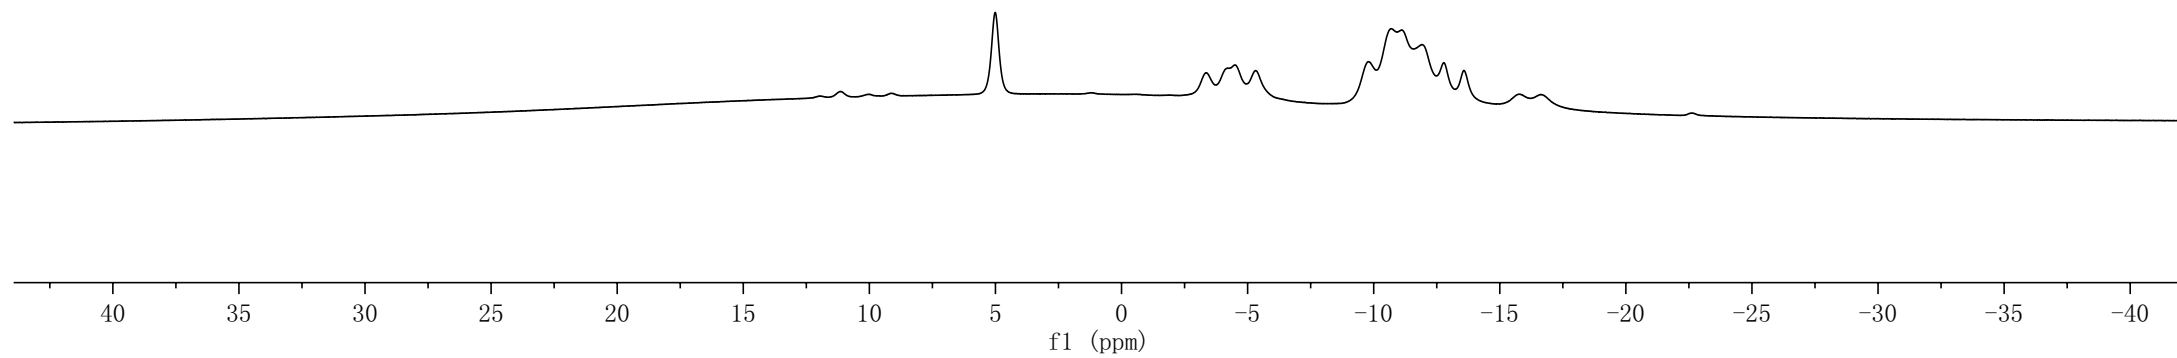

7.45  
7.45  
7.44  
7.43  
7.43  
7.41  
7.41  
7.40  
7.40  
7.26  
7.25  
7.25  
7.25  
7.24  
7.24  
7.24  
7.23  
7.23  
7.22  
7.22  
7.22  
7.21  
7.15  
7.15  
7.14  
7.14  
7.13  
7.13  
7.13  
7.12  
7.12

2.06

0.00

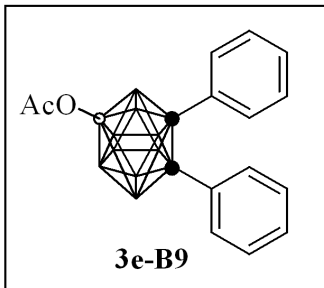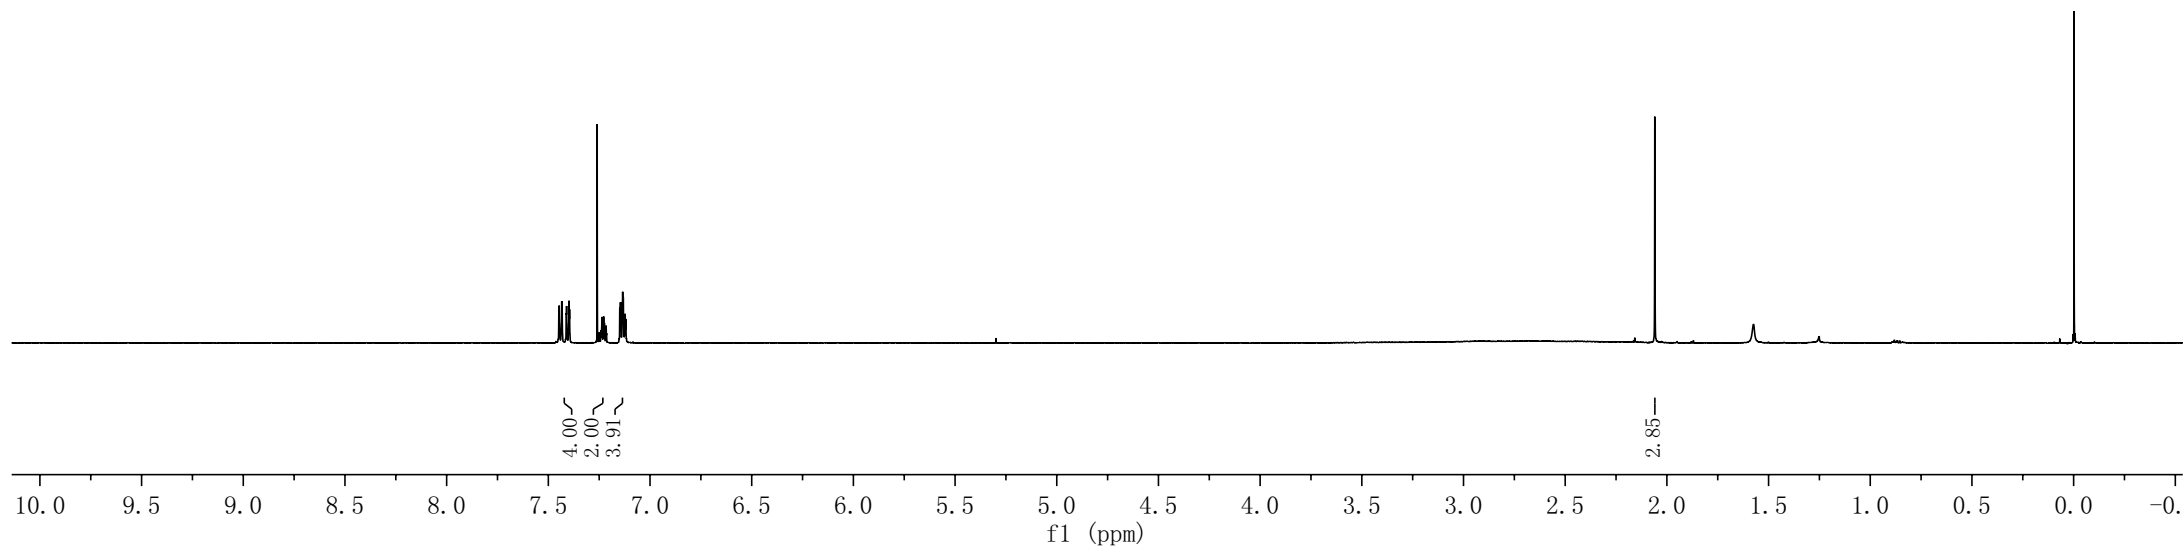



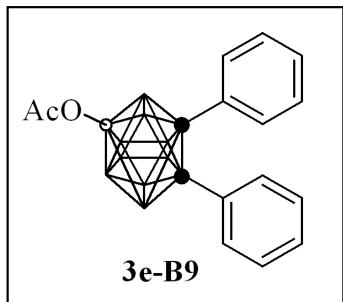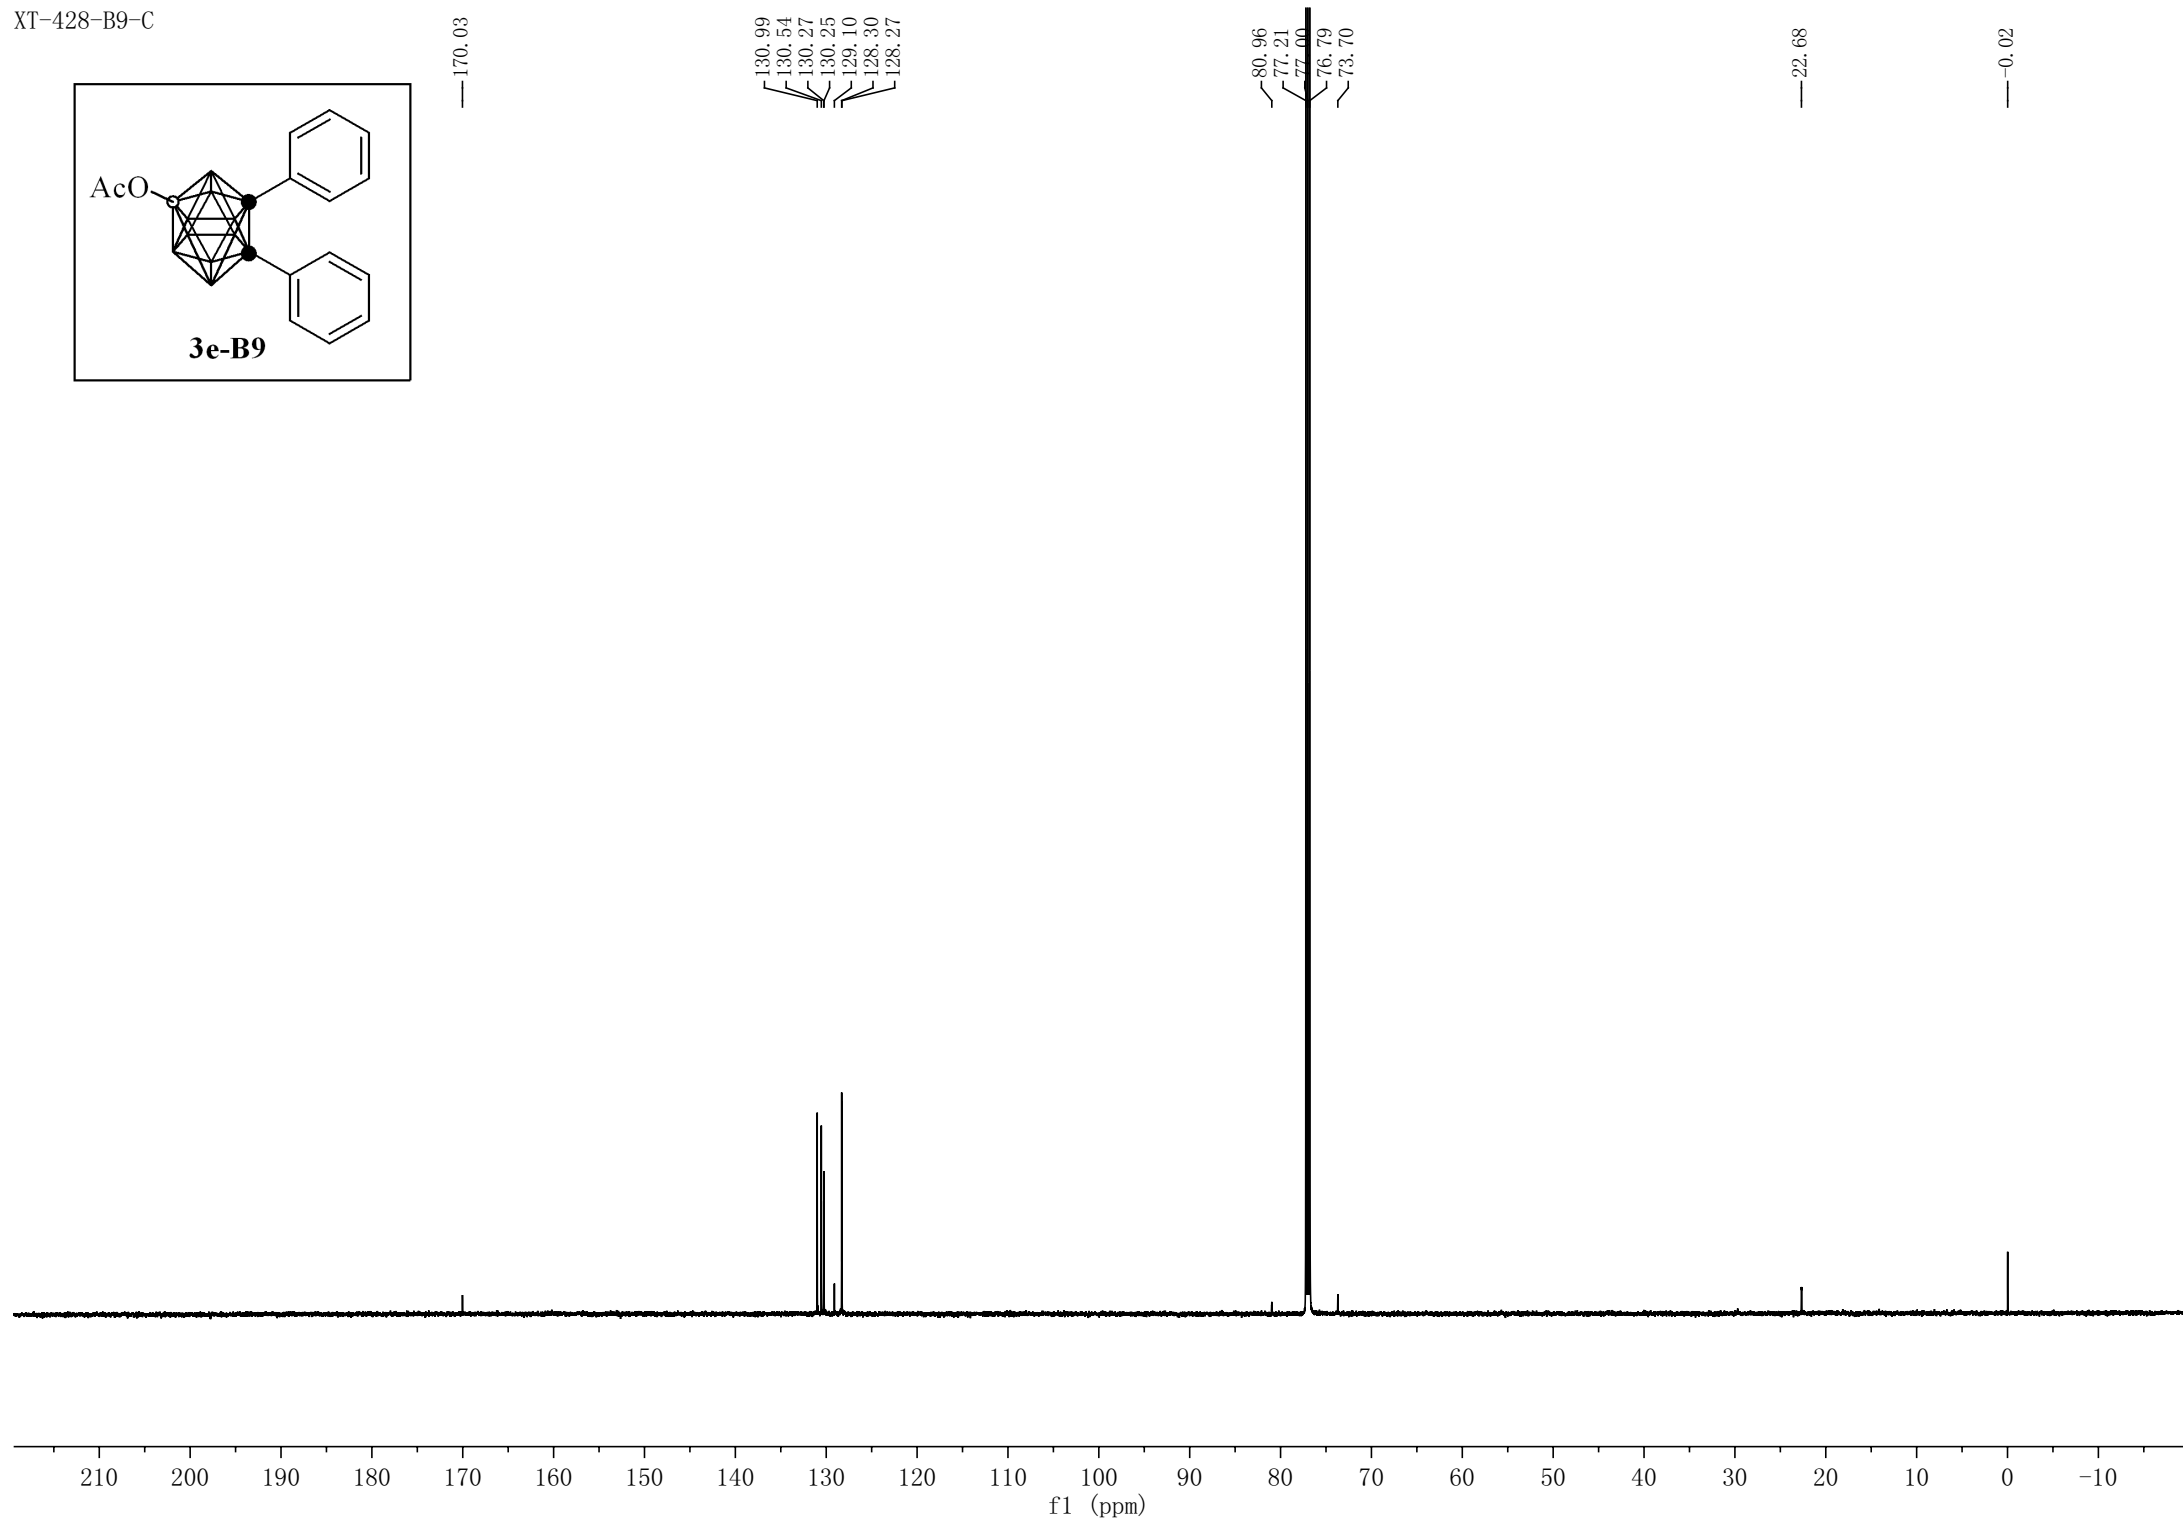

XT-428-B9-B {H}

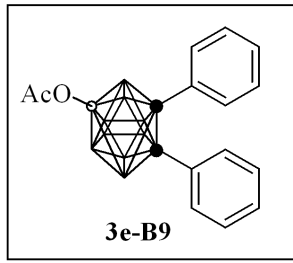

— 11.83

— 3.28

— 9.96

— 11.04

— 13.43

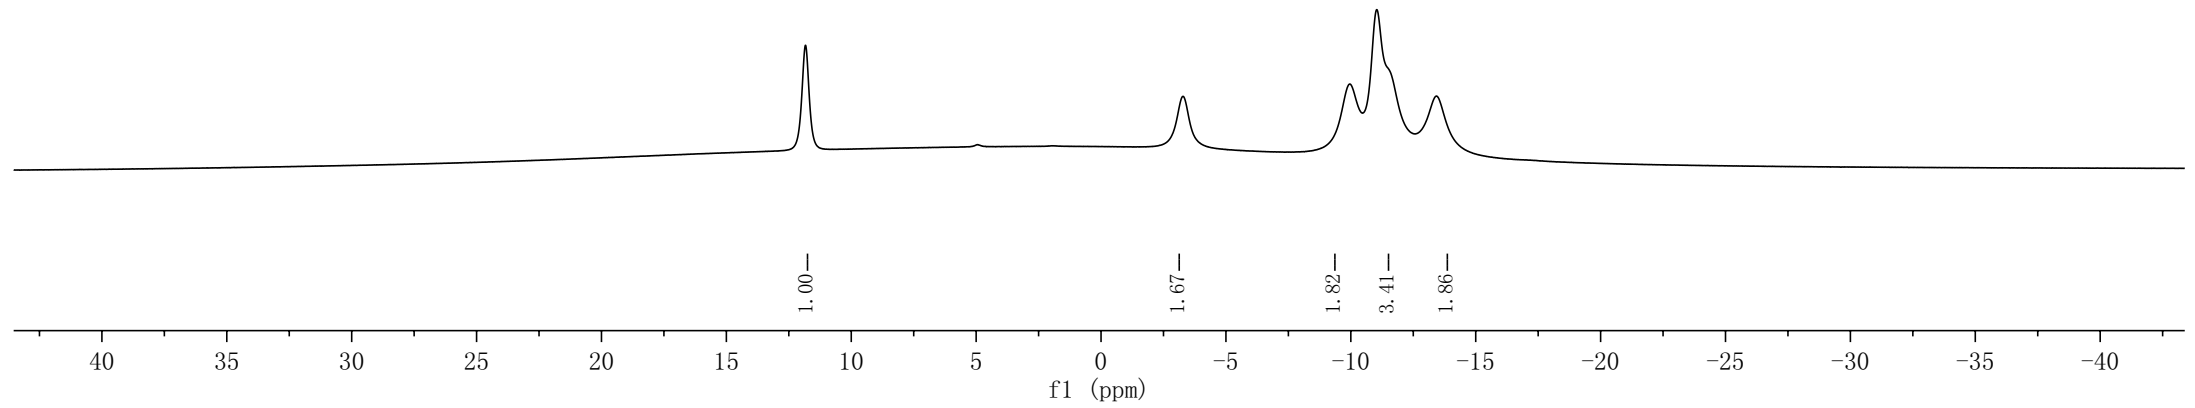

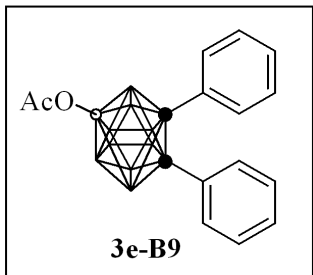

— 11.83

— 2.90  
— 3.67

— 9.58  
— 10.63  
— 11.40  
— 12.99  
— 13.86

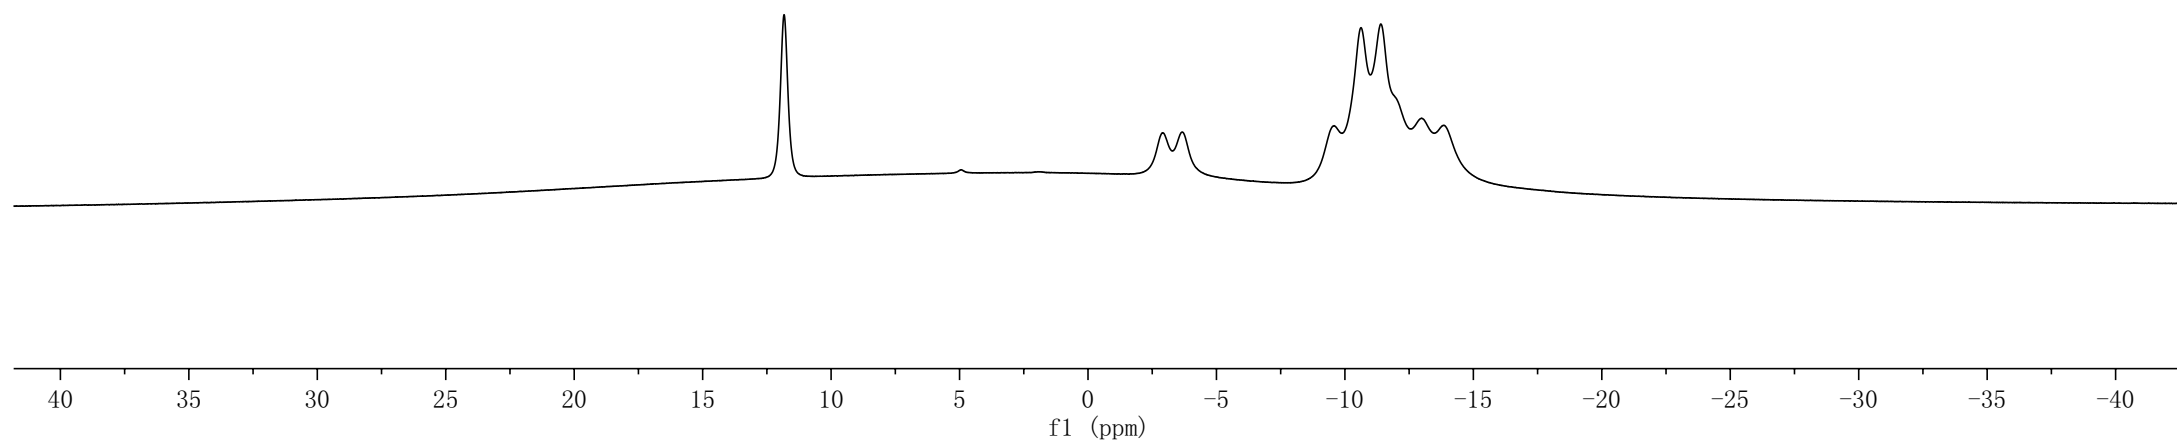

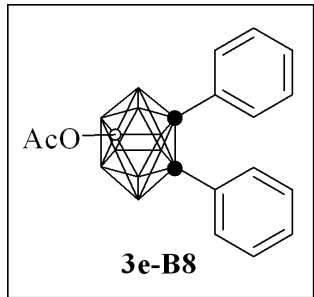

7.46  
7.46  
7.45  
7.45  
7.45  
7.26  
7.24  
7.23  
7.22  
7.22  
7.22  
7.15  
7.14  
7.13  
7.12

—2.16

—0.00

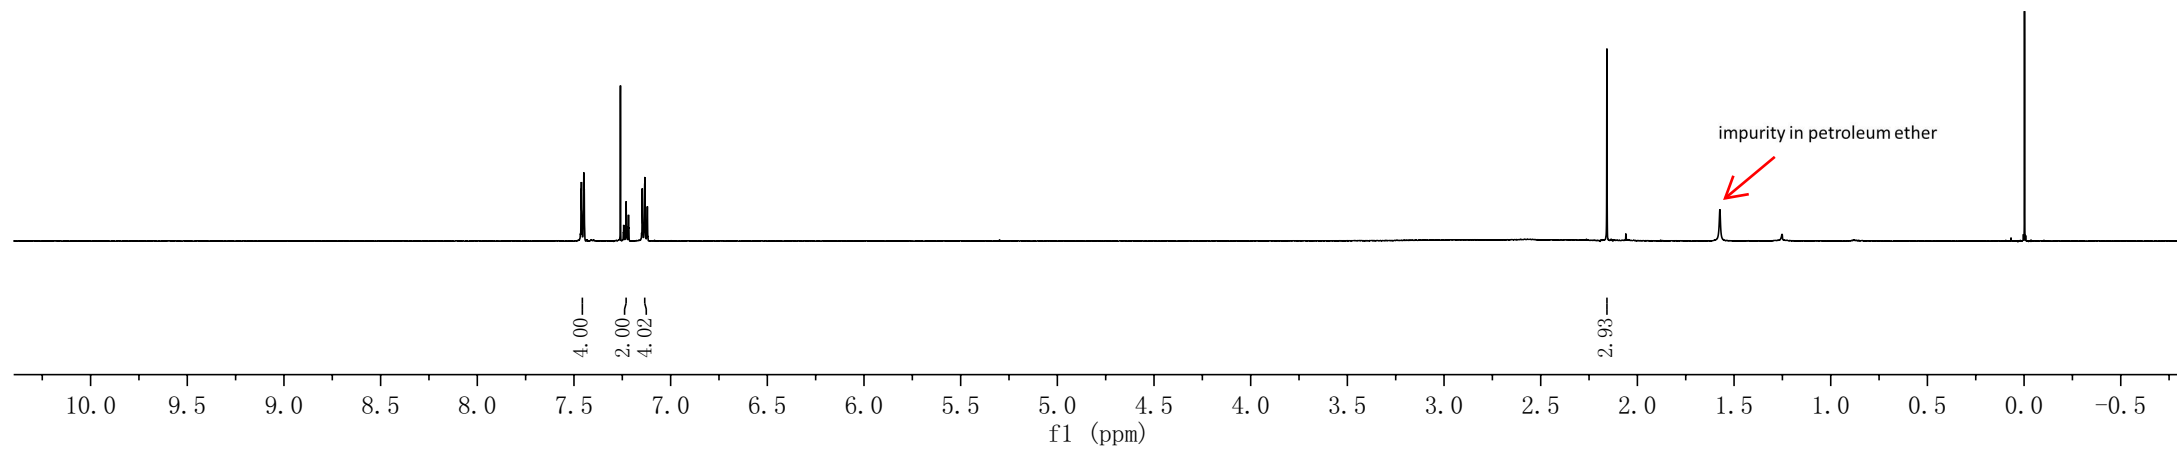

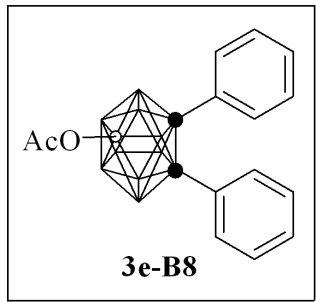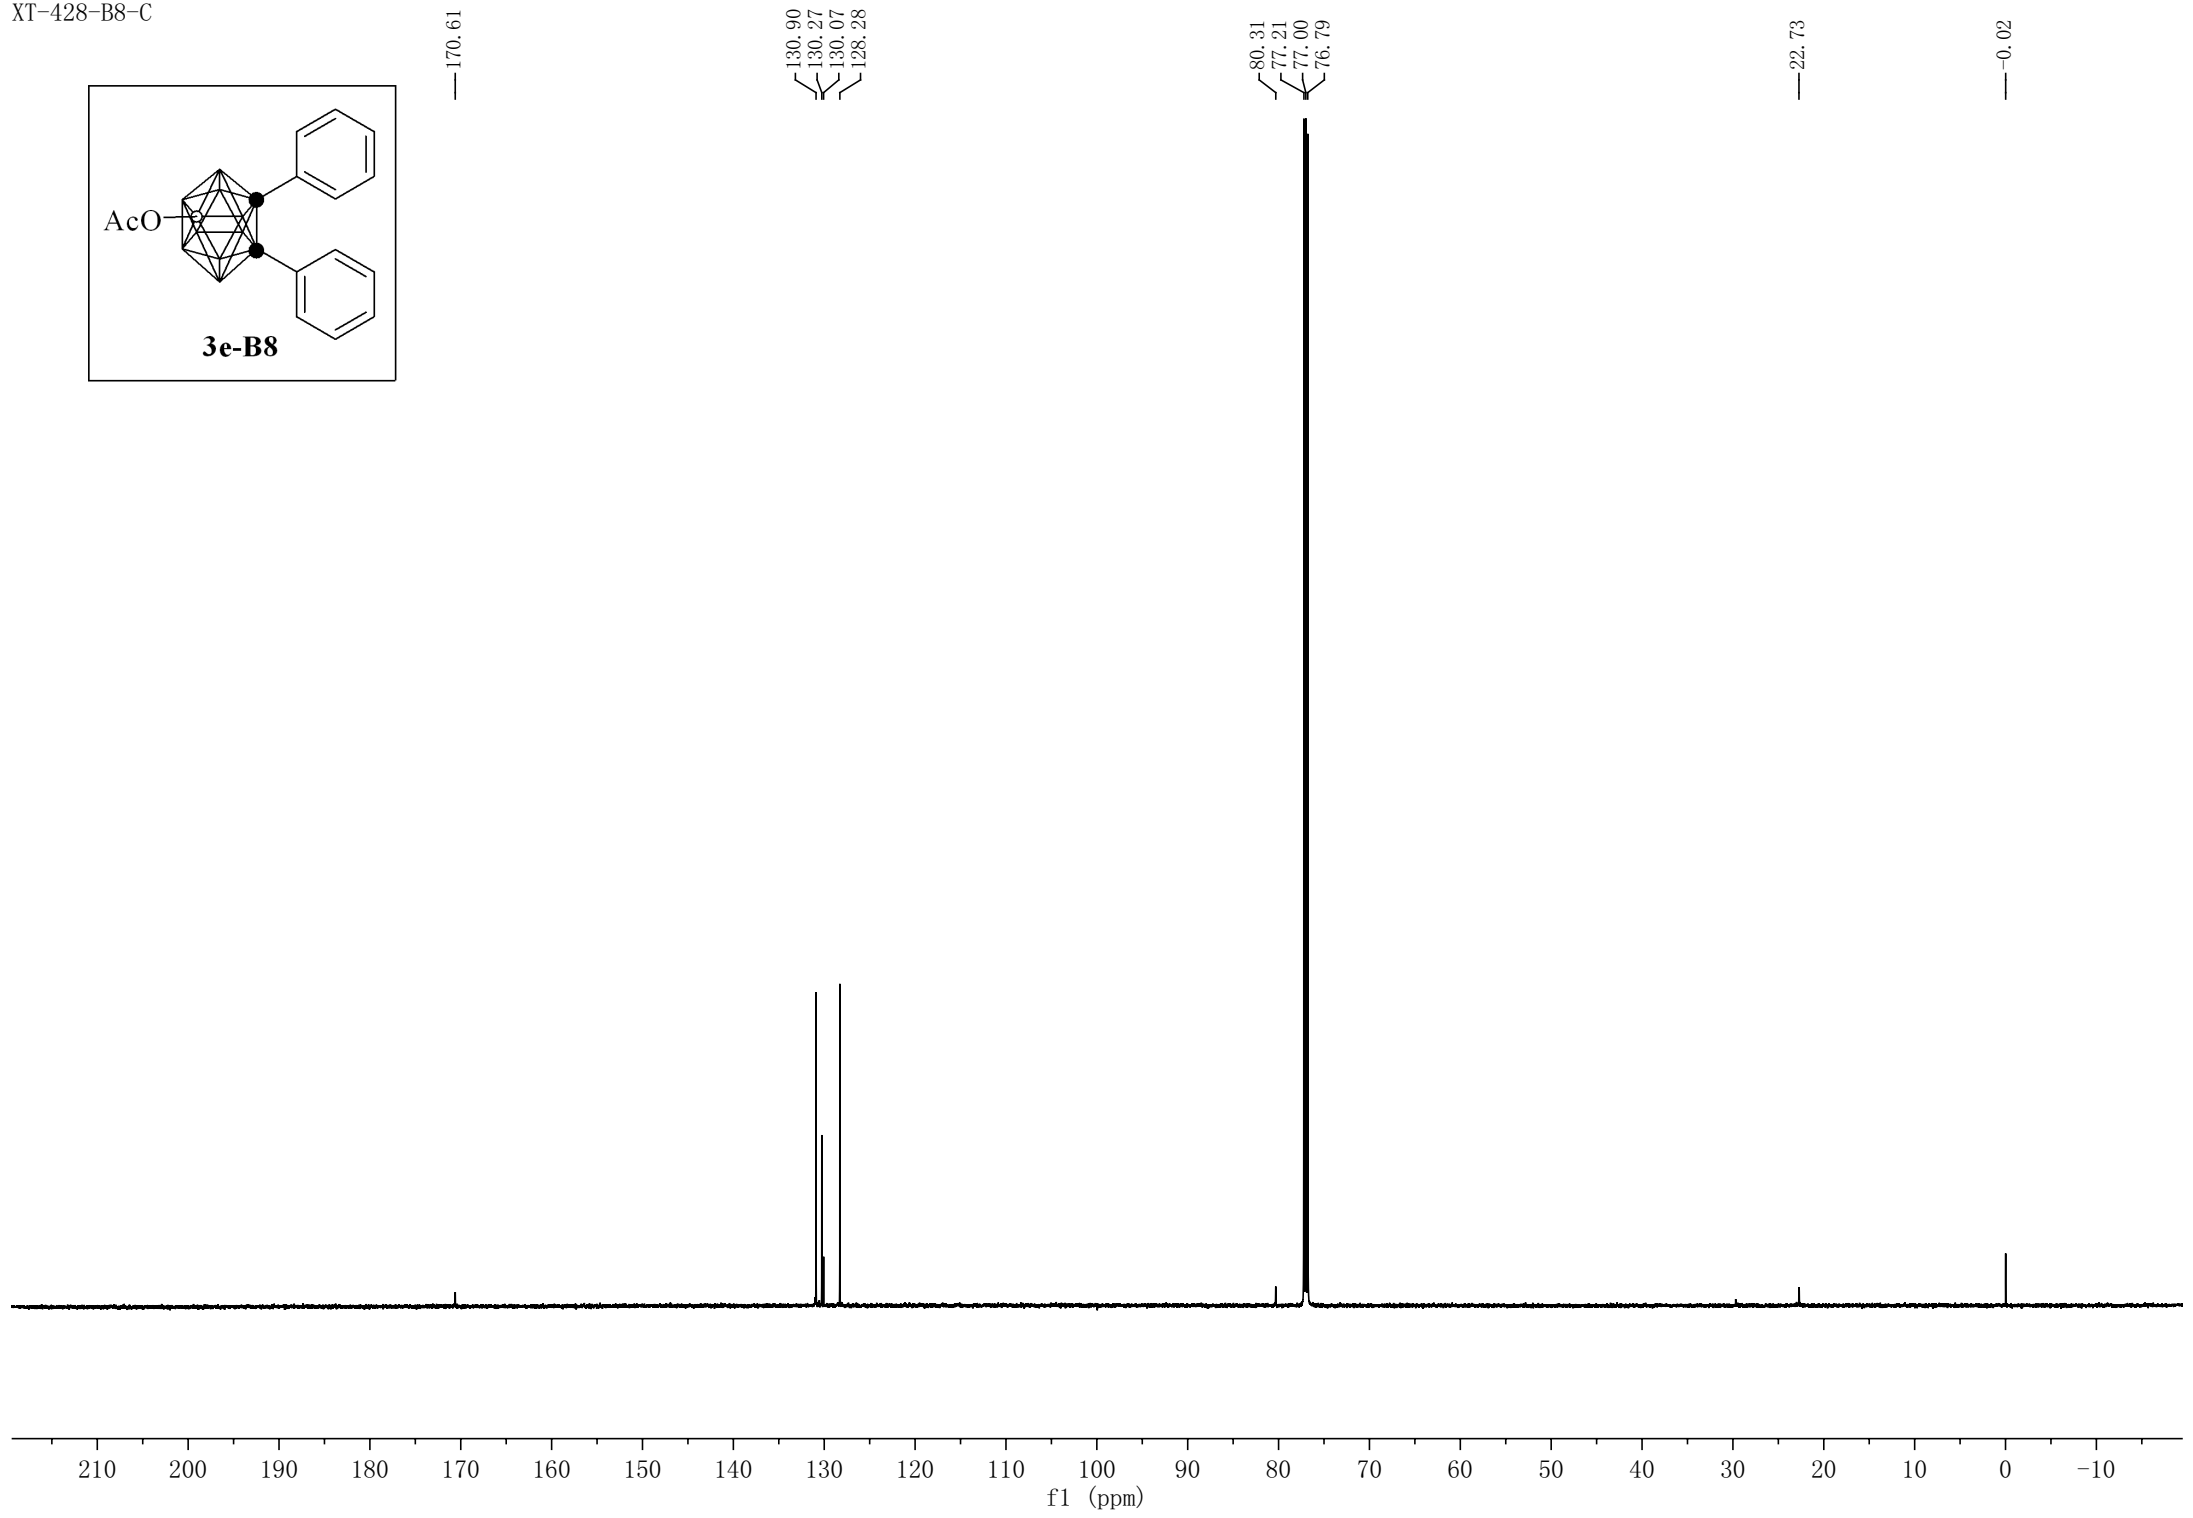

XT-428-B8-B {H}

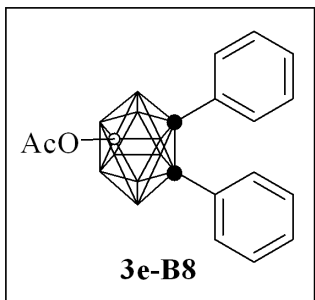

—4.94

—-2.94

—-9.95  
—-11.24  
—-12.25  
—-13.45

—-17.25

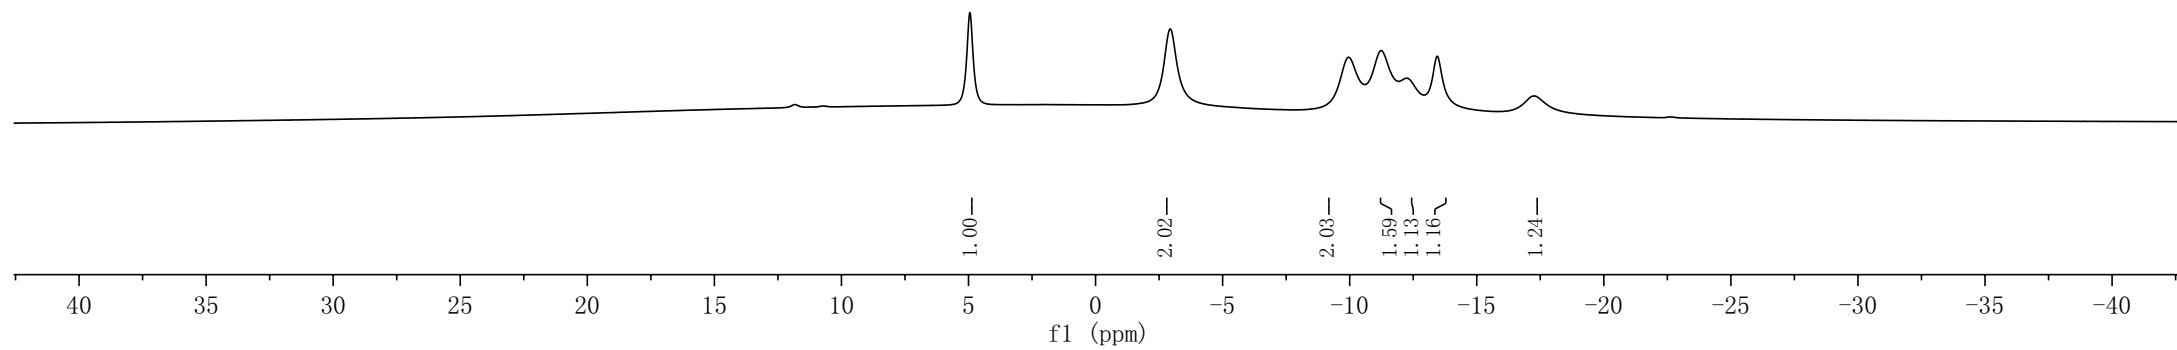

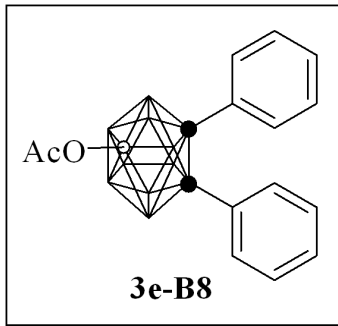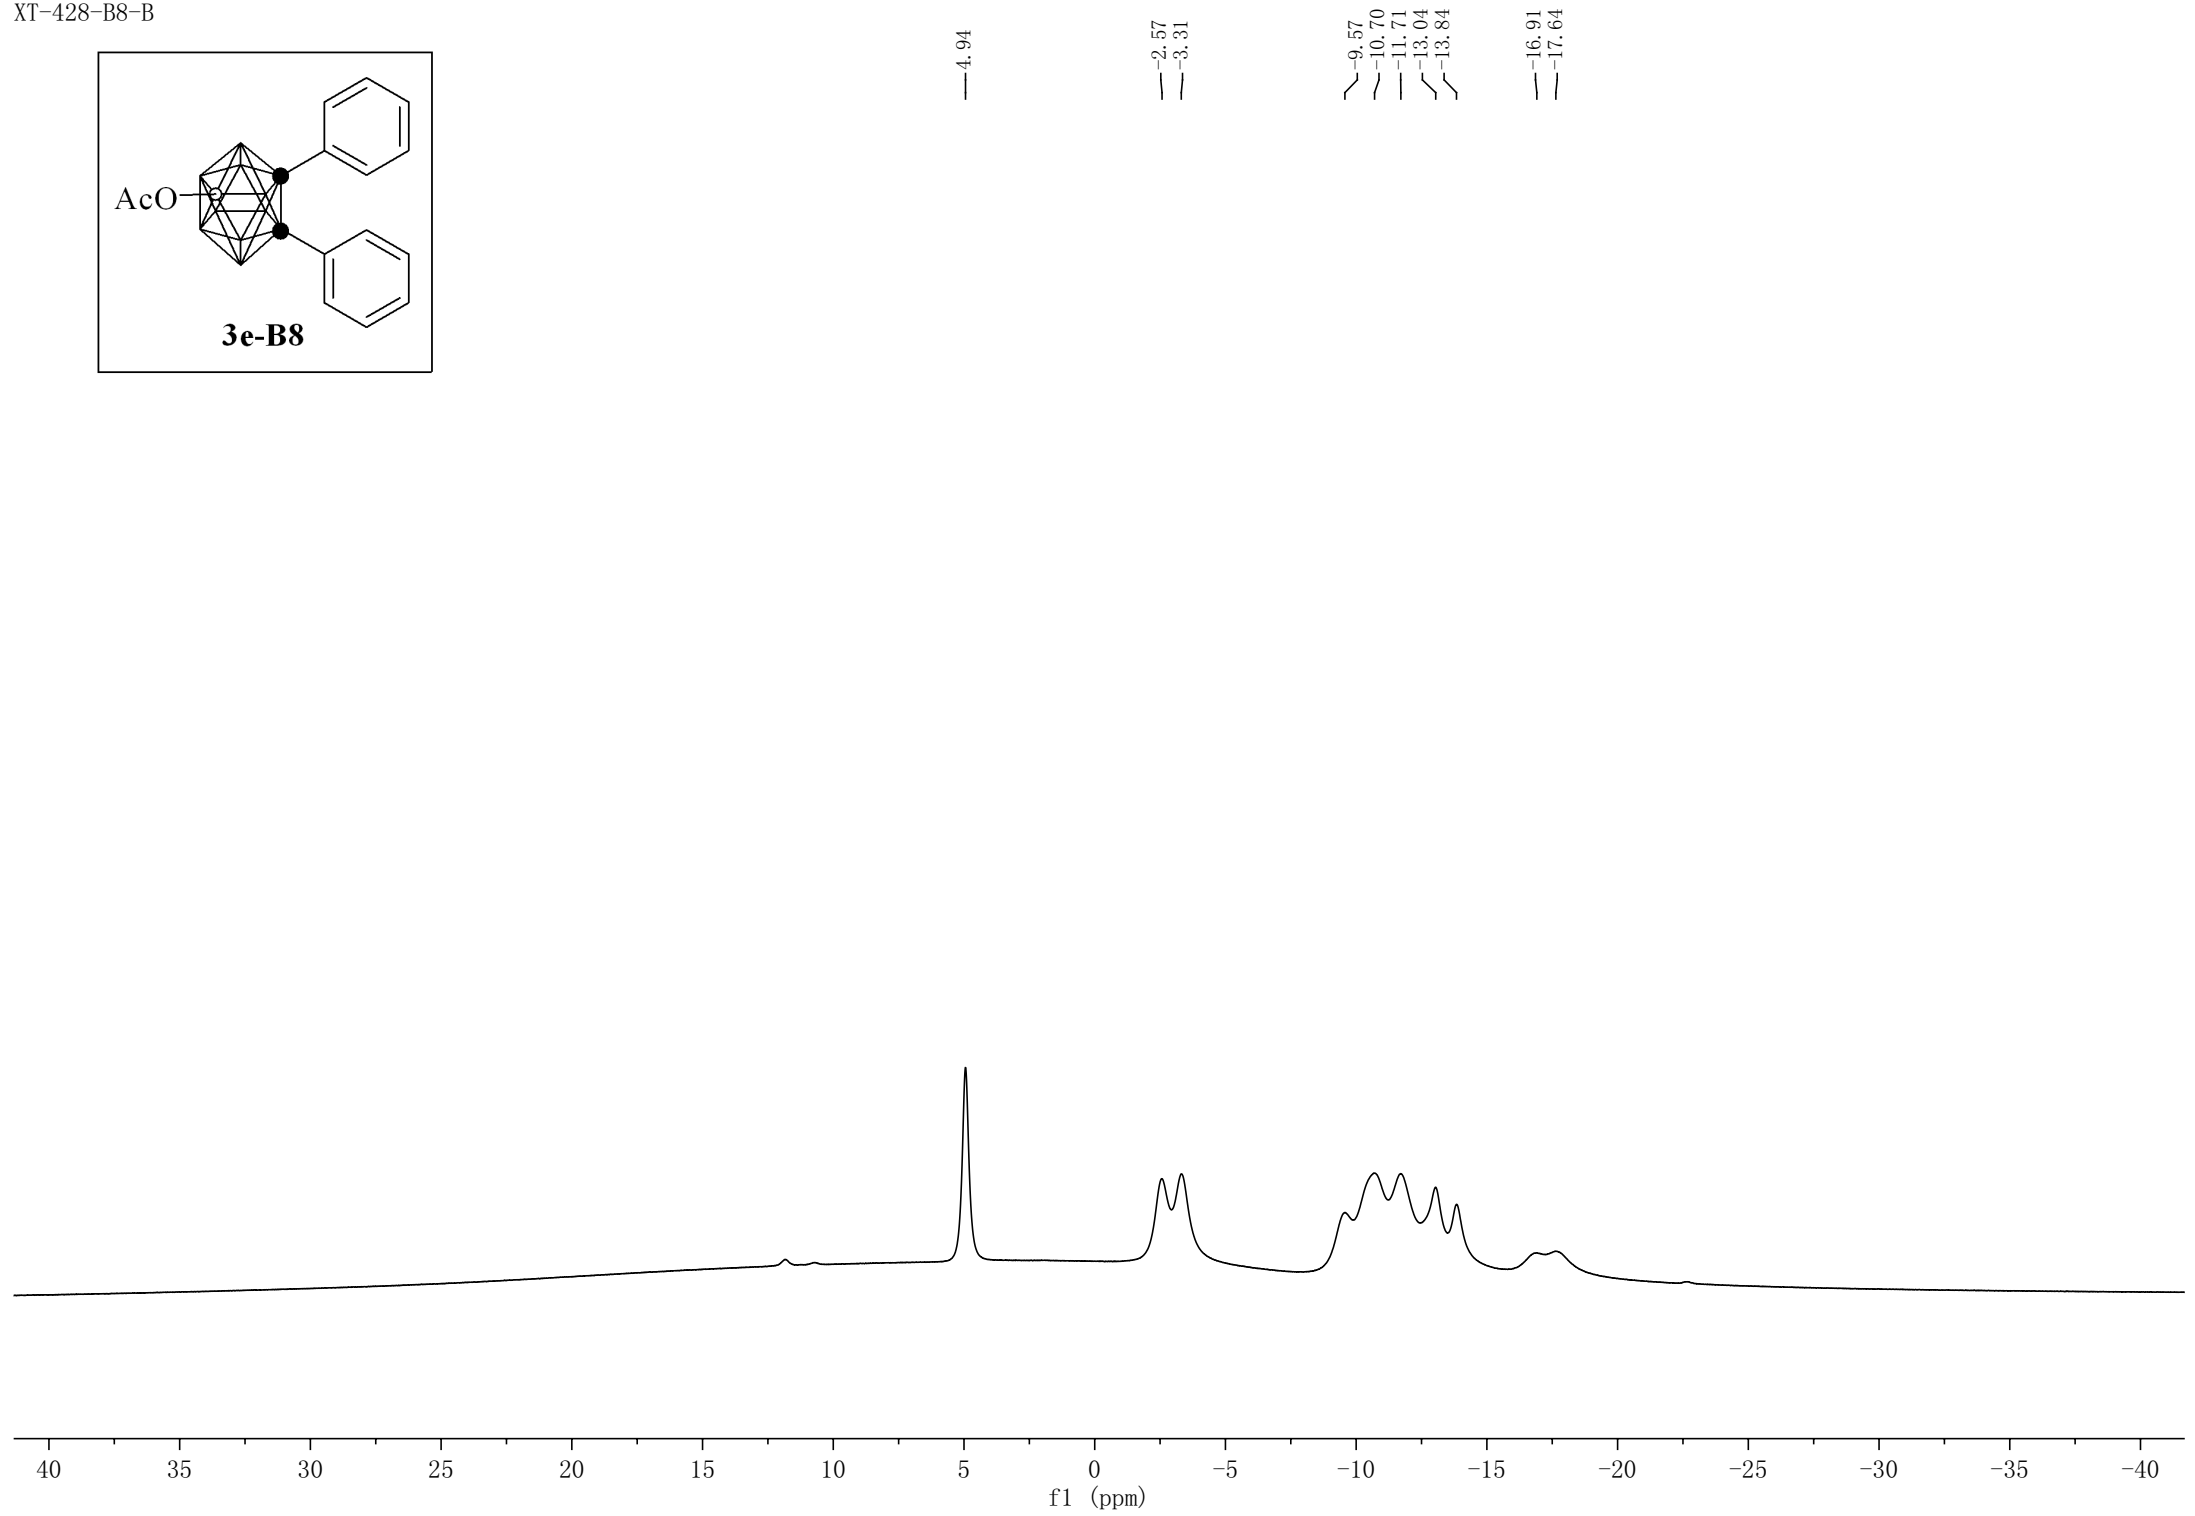

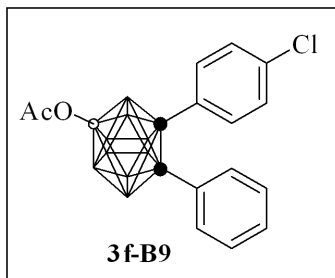

7.45  
7.44  
7.34  
7.32  
7.29  
7.28  
7.27  
7.26  
7.19  
7.17  
7.16  
7.12  
7.11

2.06

0.07  
-0.00

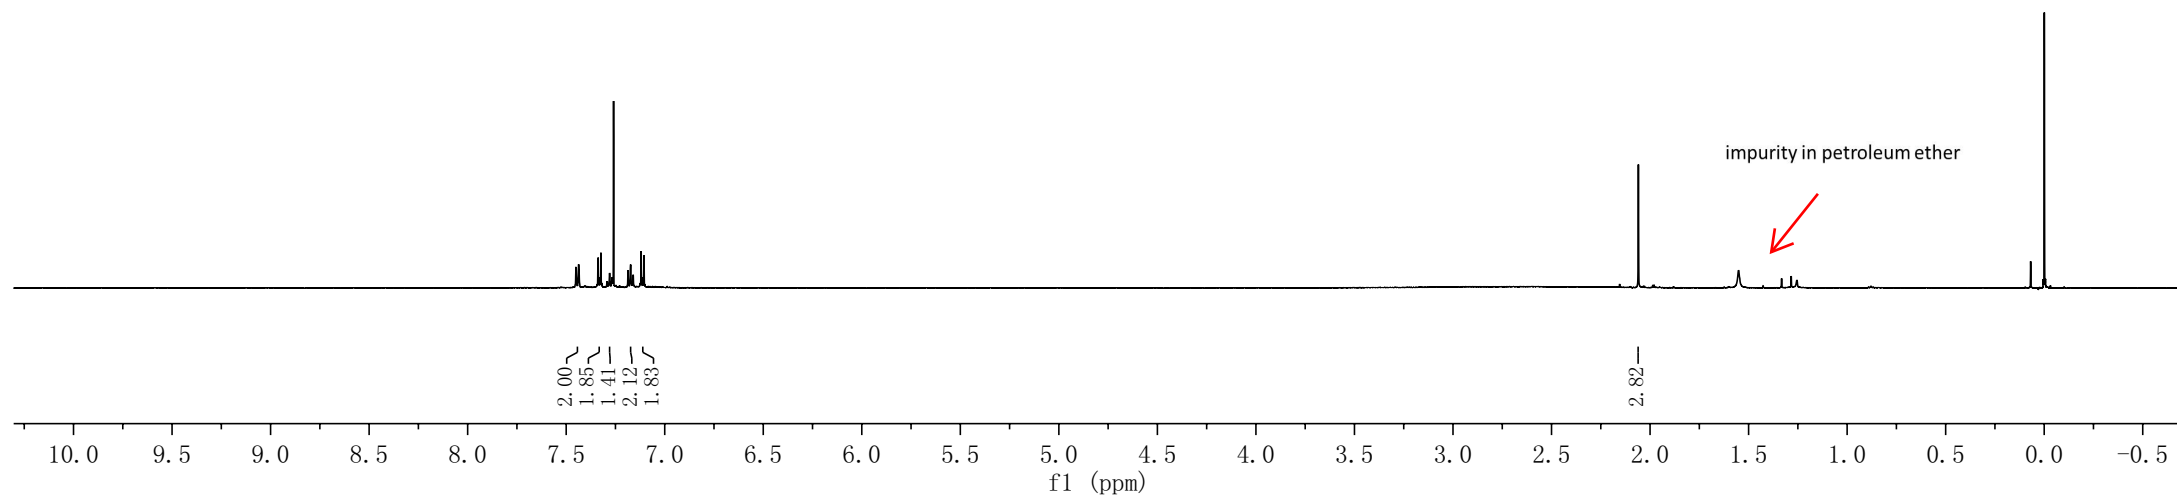



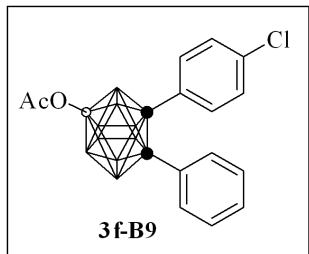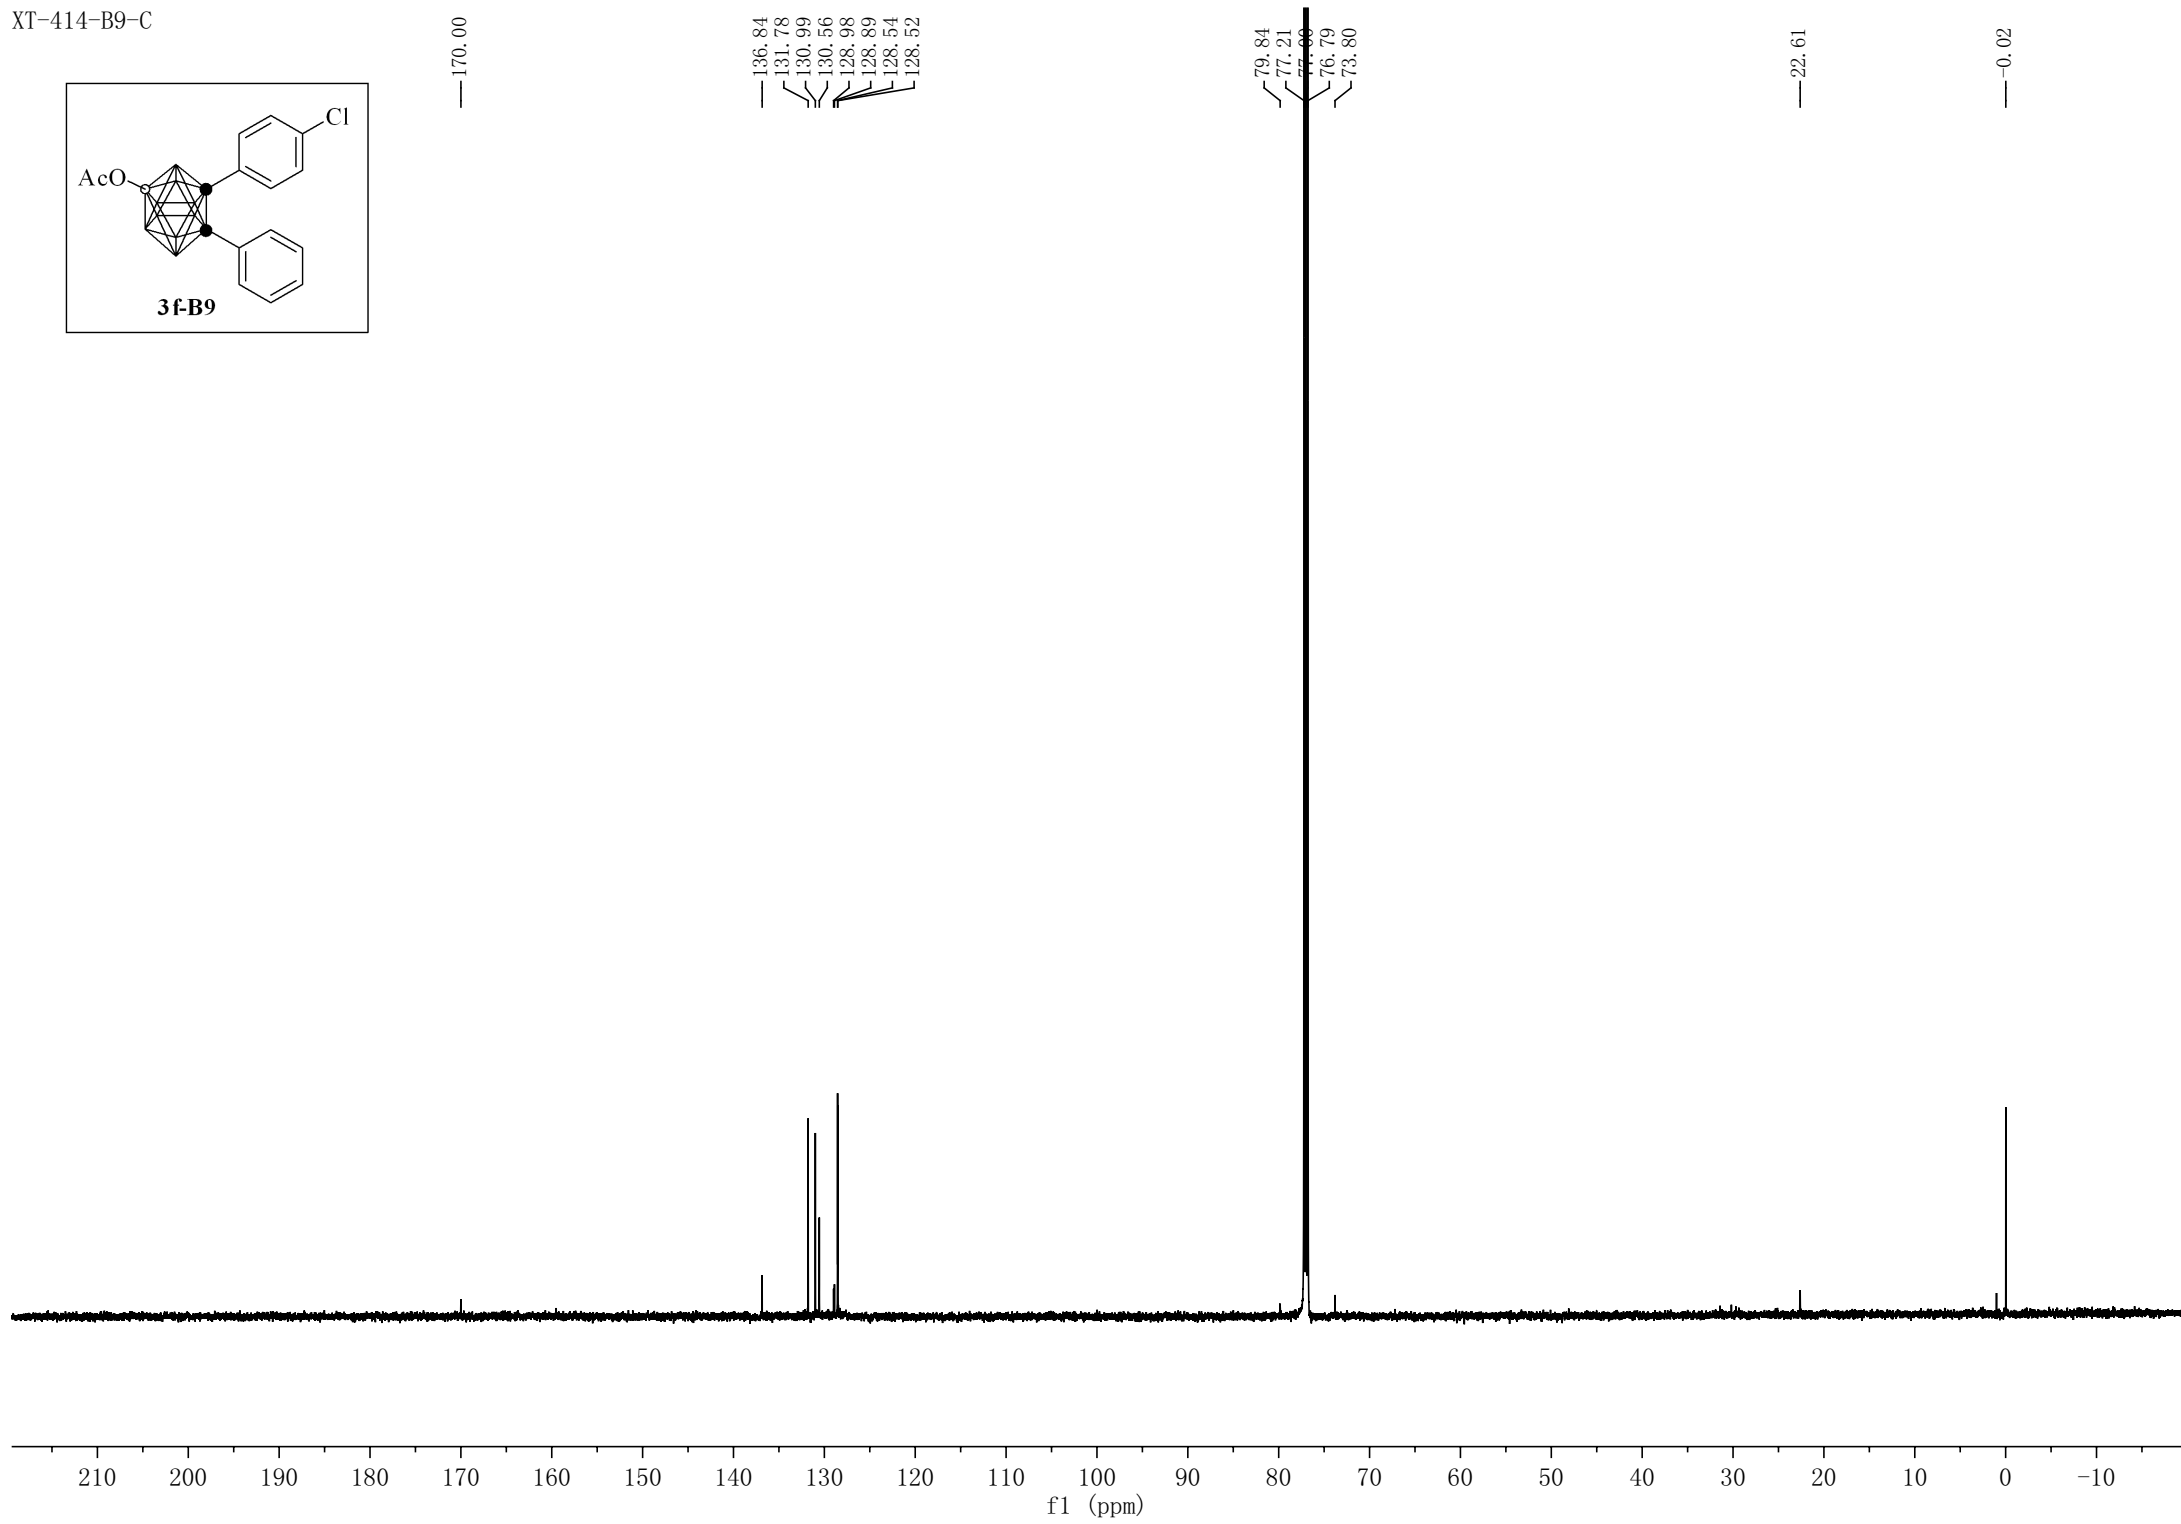

XT-414-B9-B {H}

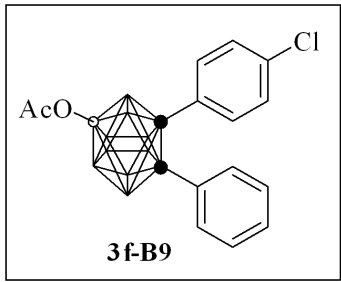

—11.88

—3.12

—10.04

—10.97

—13.56

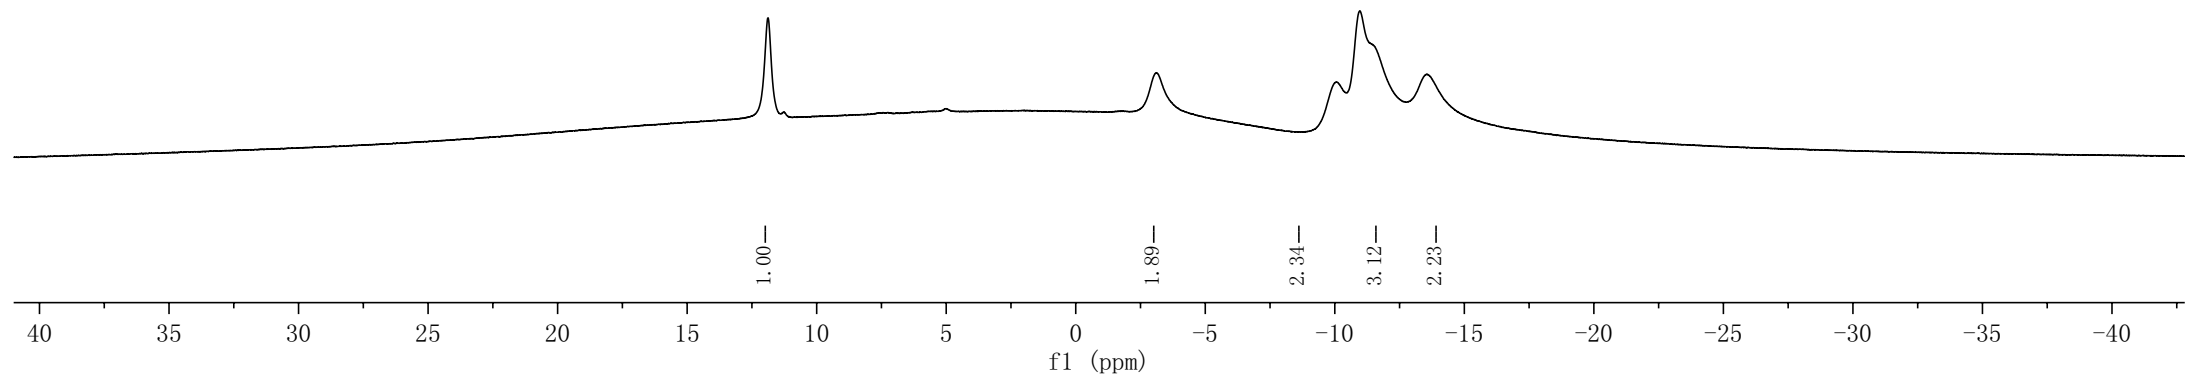

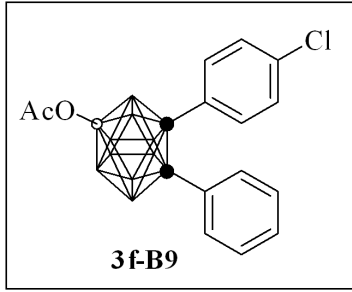

— 11.88

— 2.68  
— 3.45

— 9.58  
— 10.52  
— 11.28

— 13.03  
— 13.85

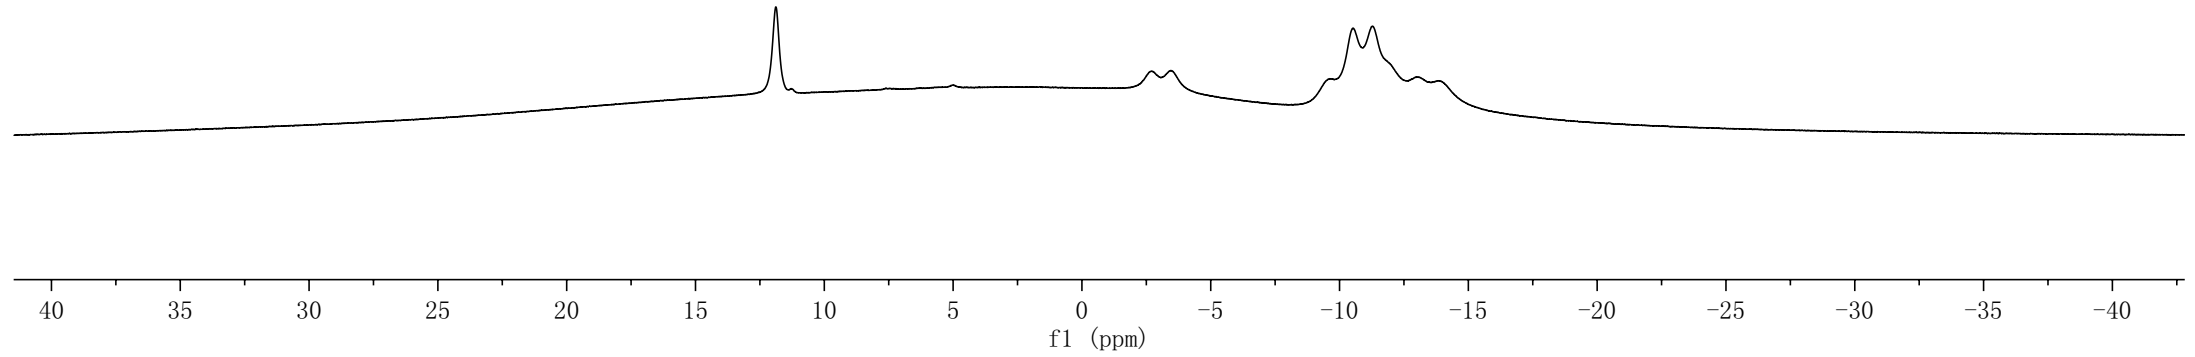

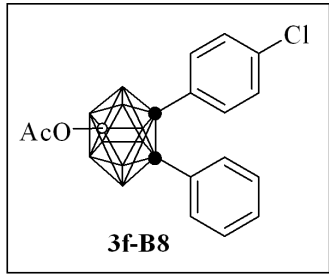

7.47  
7.45  
7.39  
7.38  
7.29  
7.27  
7.26  
7.19  
7.17  
7.16  
7.12  
7.11

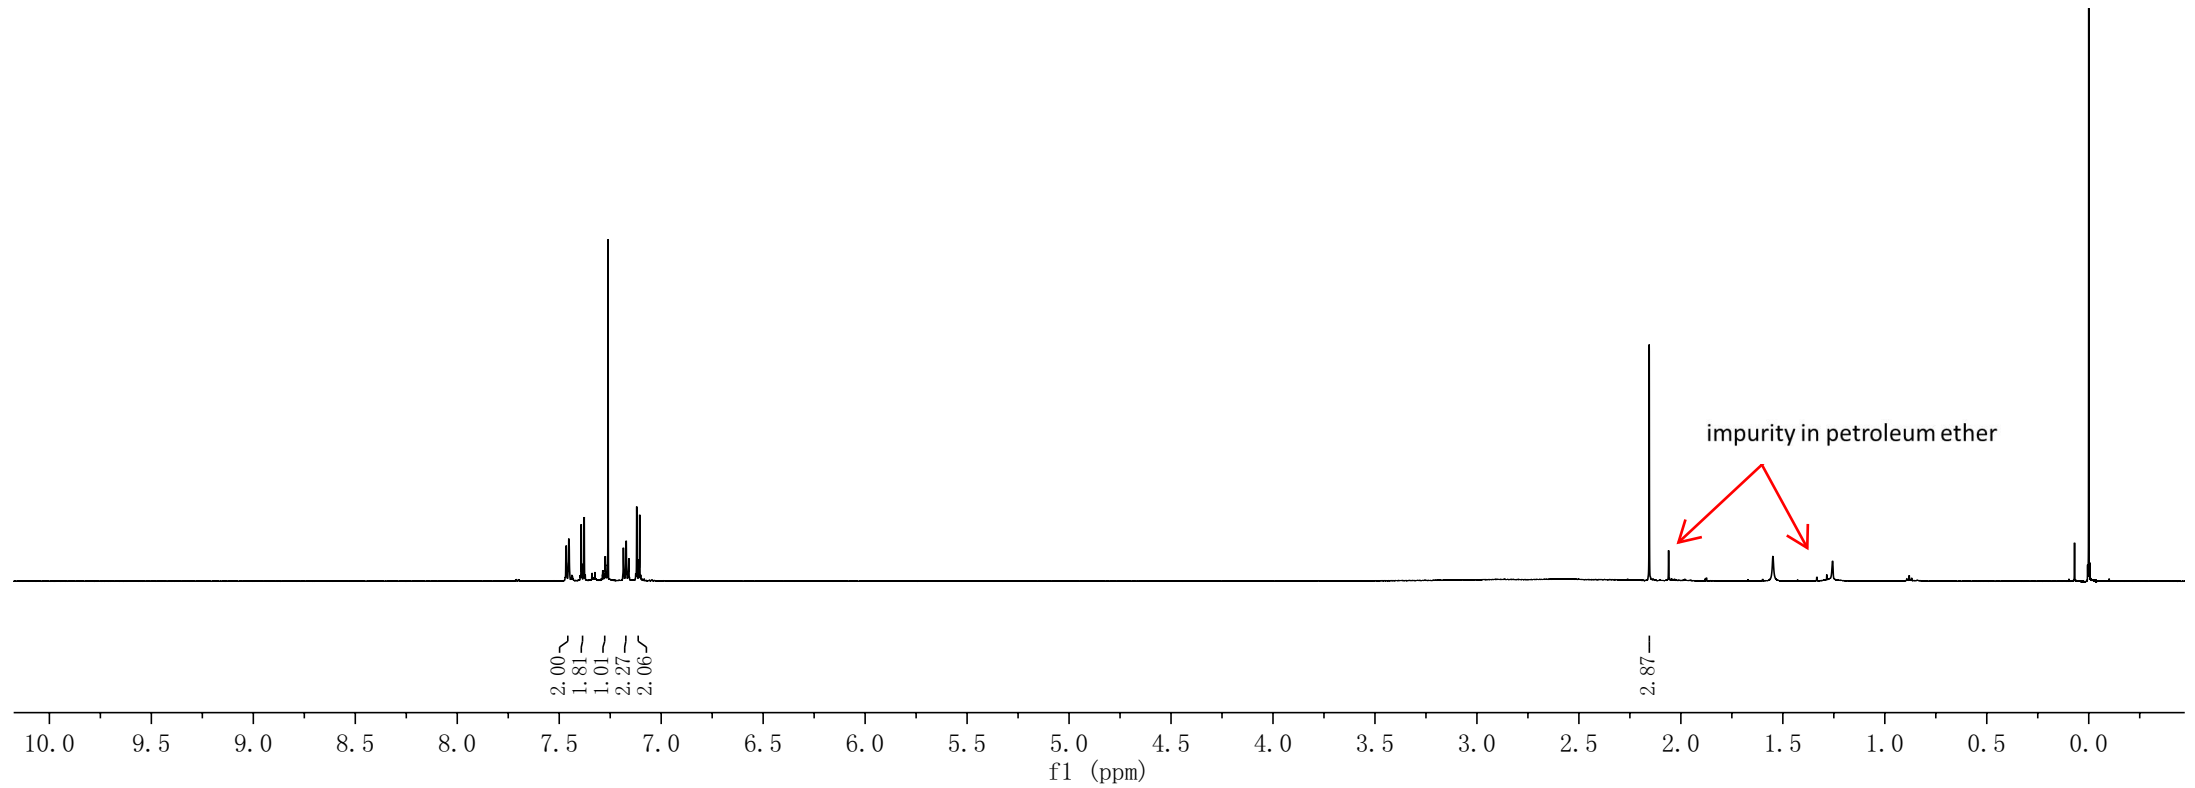

—2.16—

—0.00—

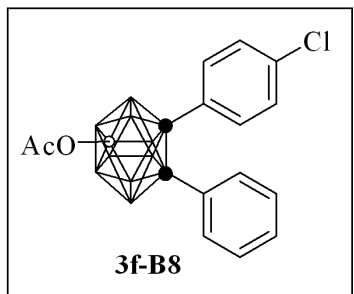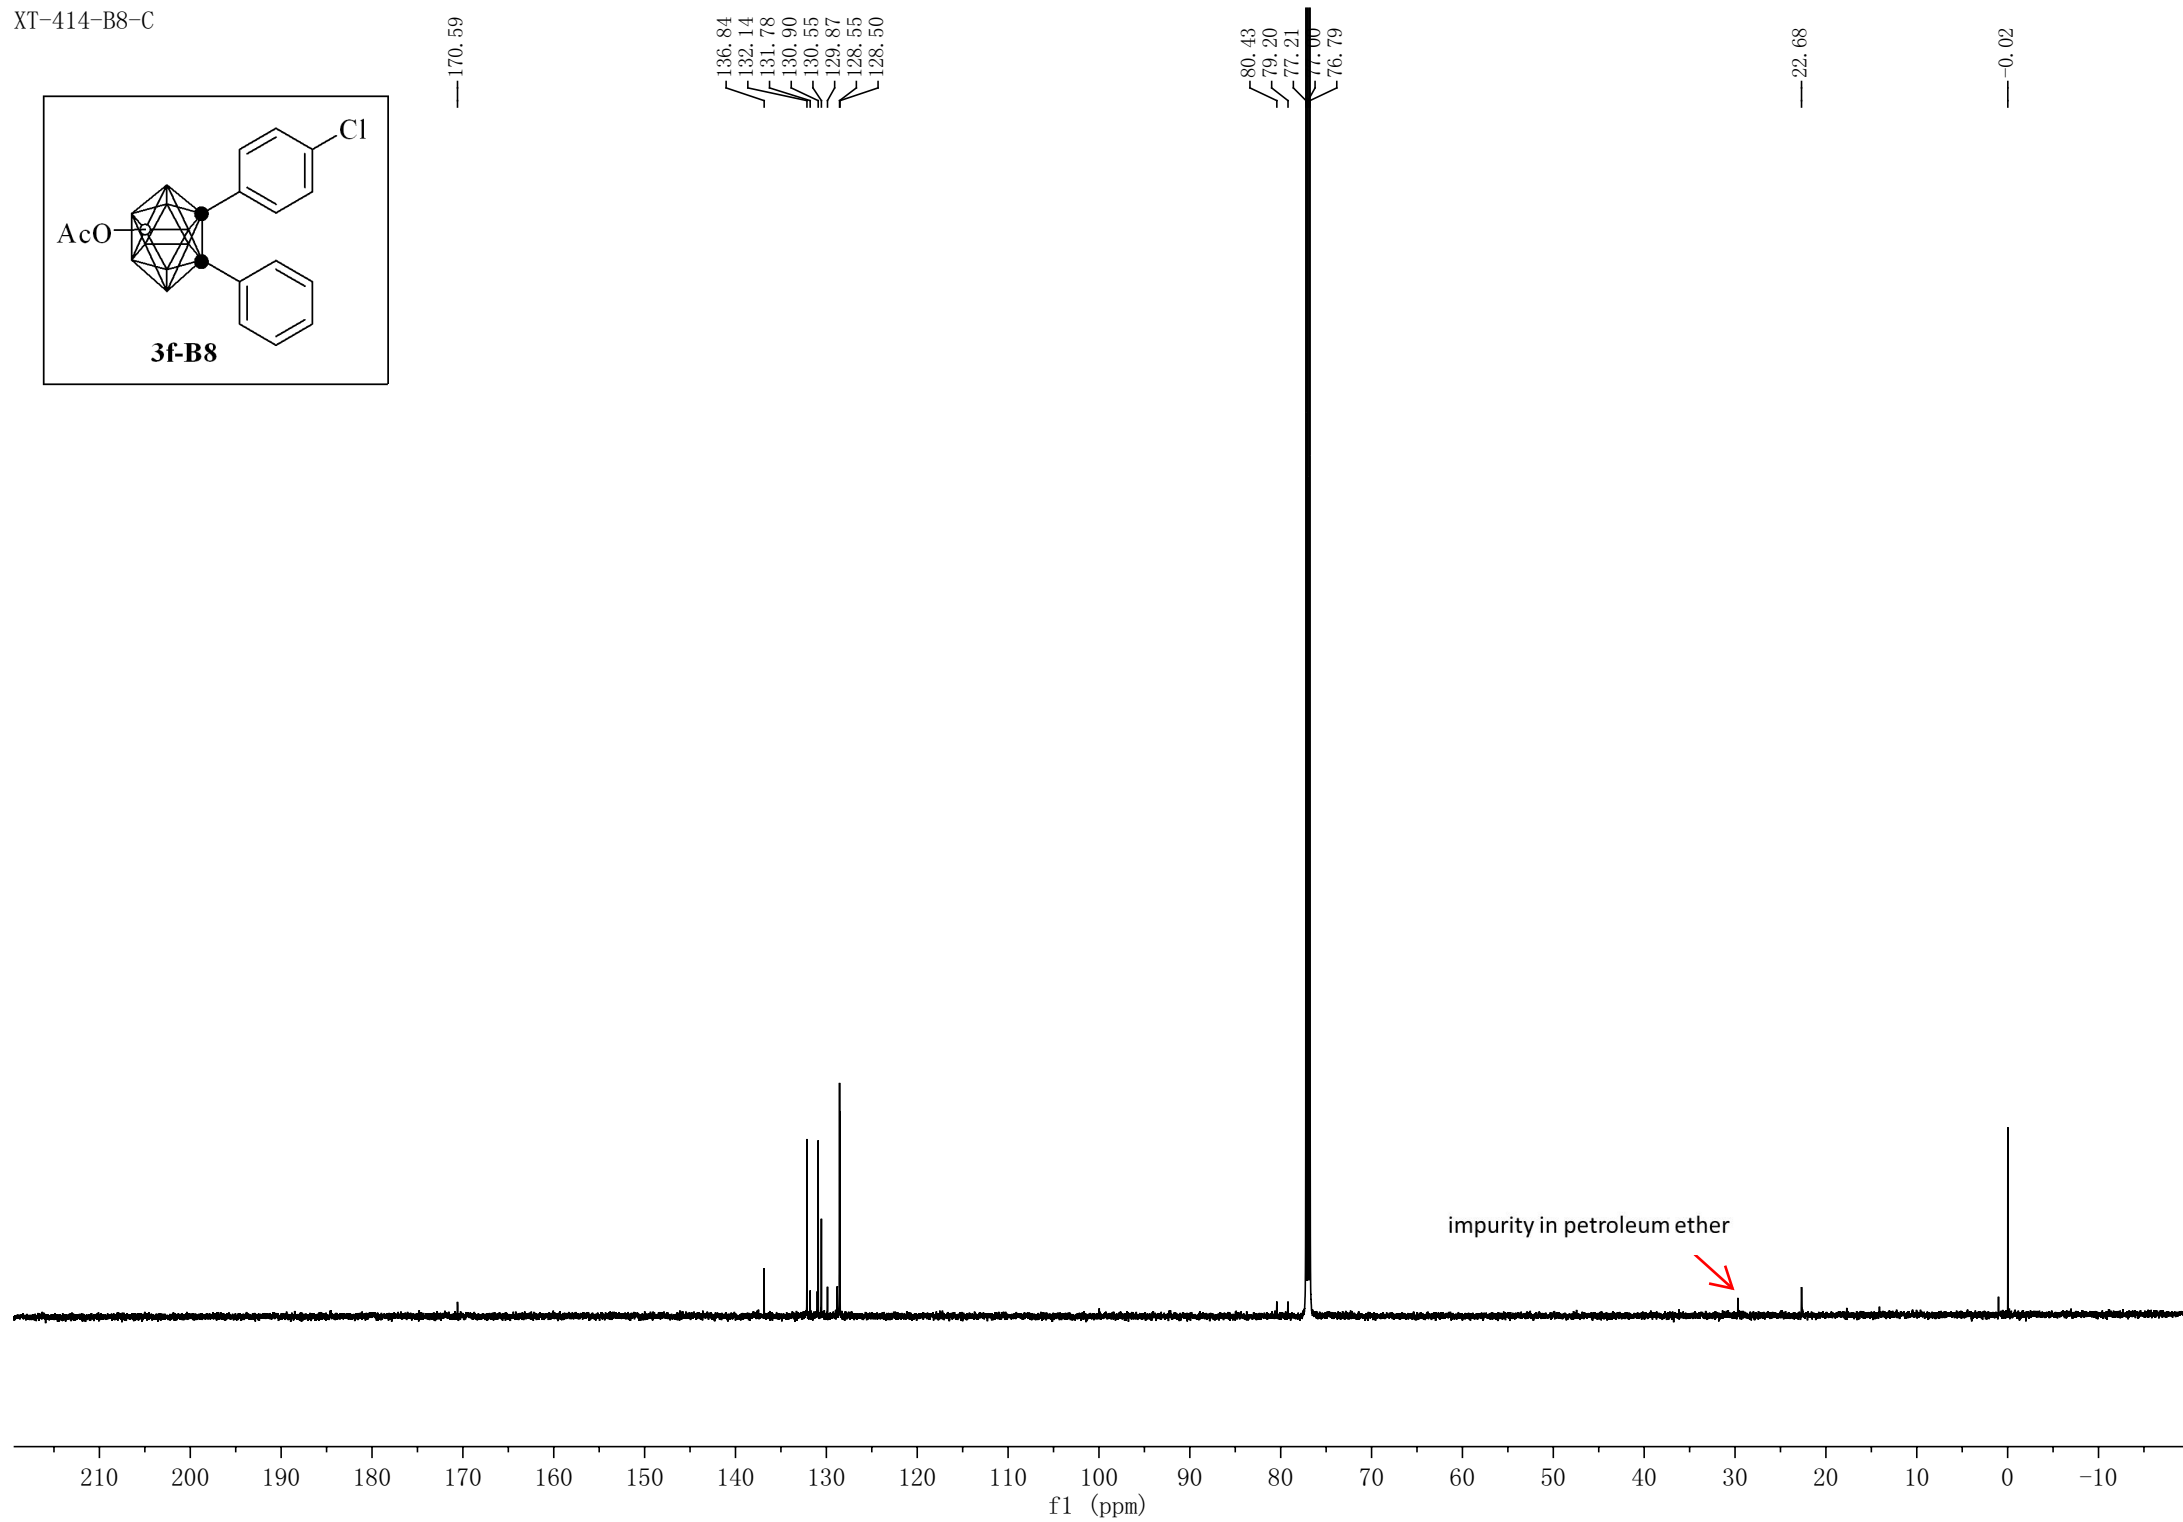

XT-414-B8-B {H}

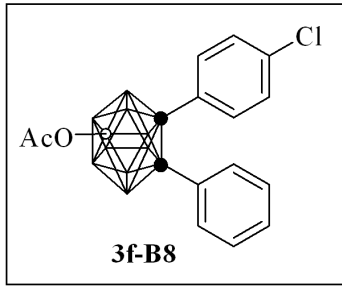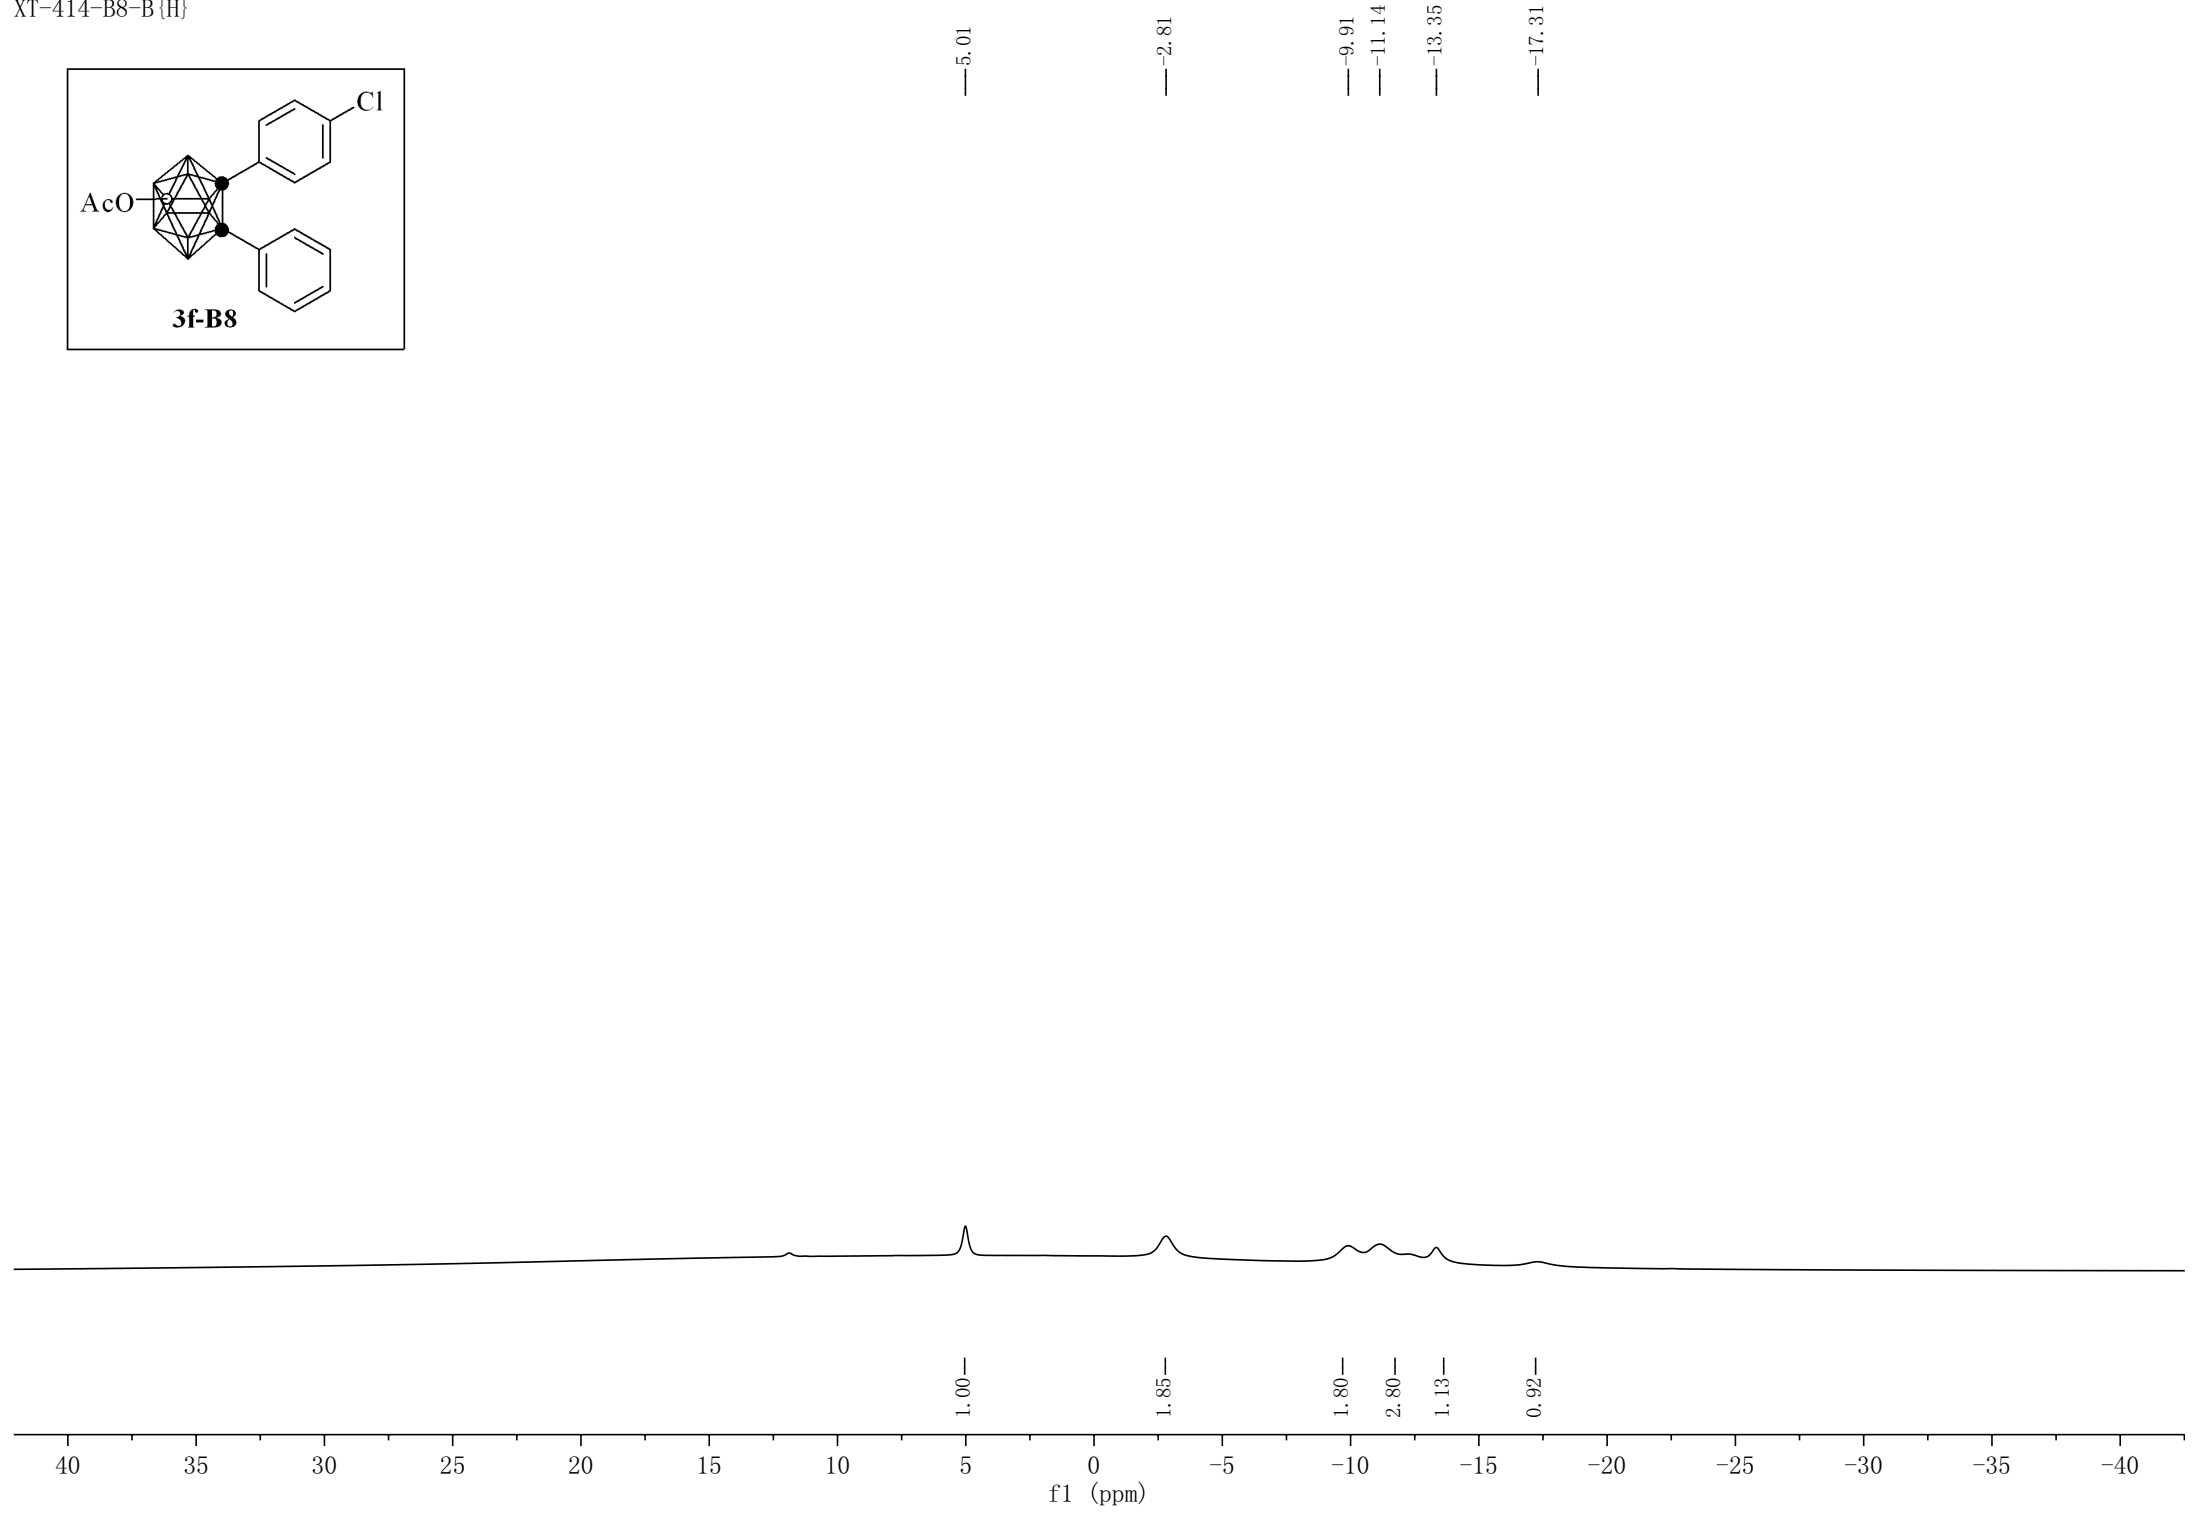

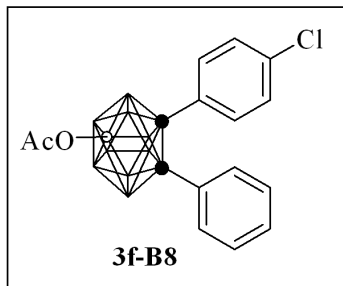

—5.01

—2.45  
—3.19

—9.55  
—10.56  
—11.63  
—12.96  
—13.74

—17.00  
—17.65

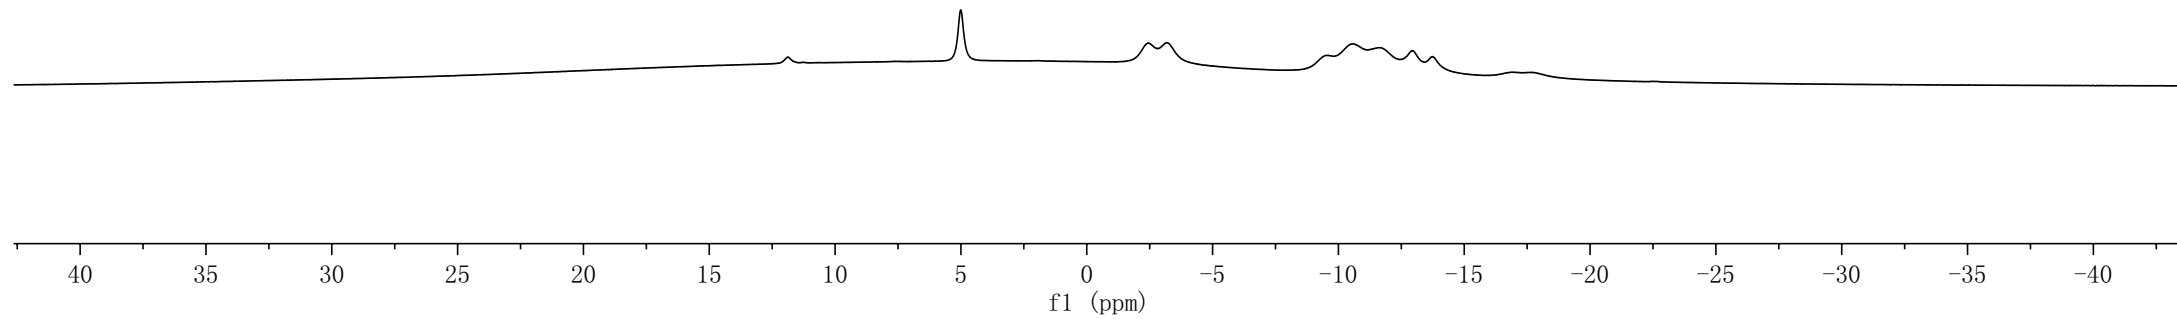

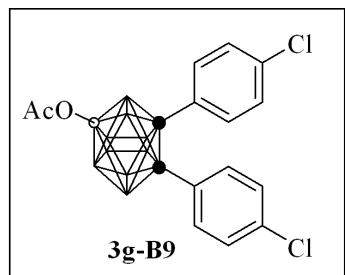

7.38  
7.37  
7.35  
7.33  
7.26  
7.16  
7.15

—2.06

—-0.00

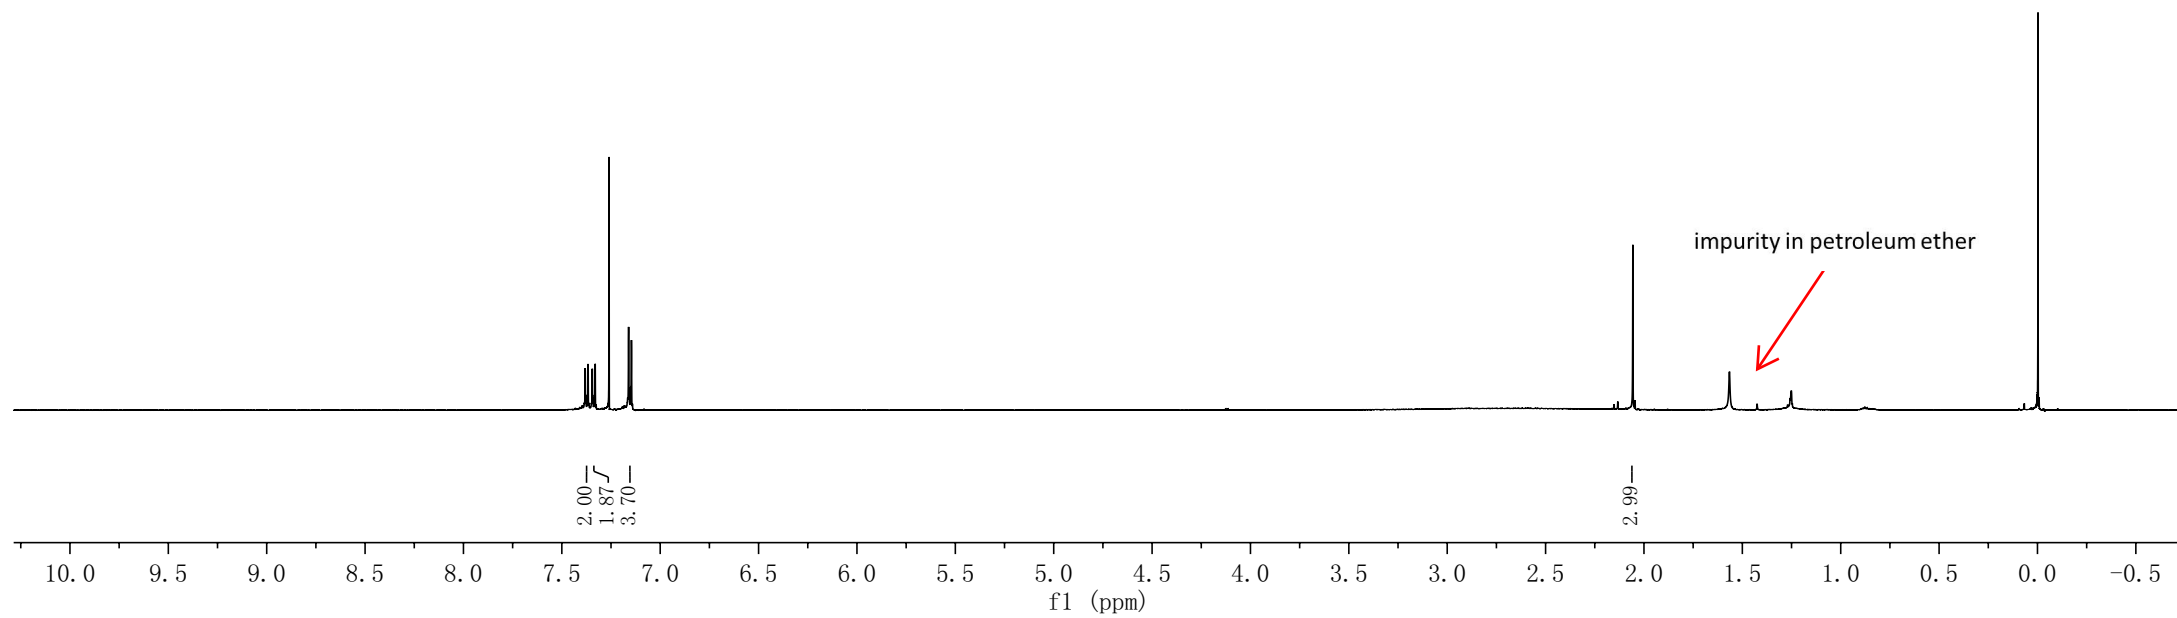



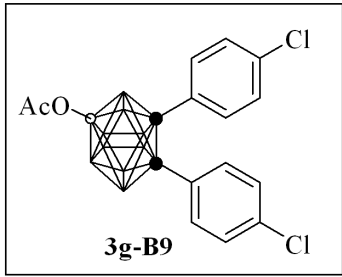

—169.99

137.13  
132.21  
132.12  
131.76  
128.80  
128.78  
128.71  
127.59

79.97  
77.21  
77.00  
76.79  
72.76

—22.60

—0.02

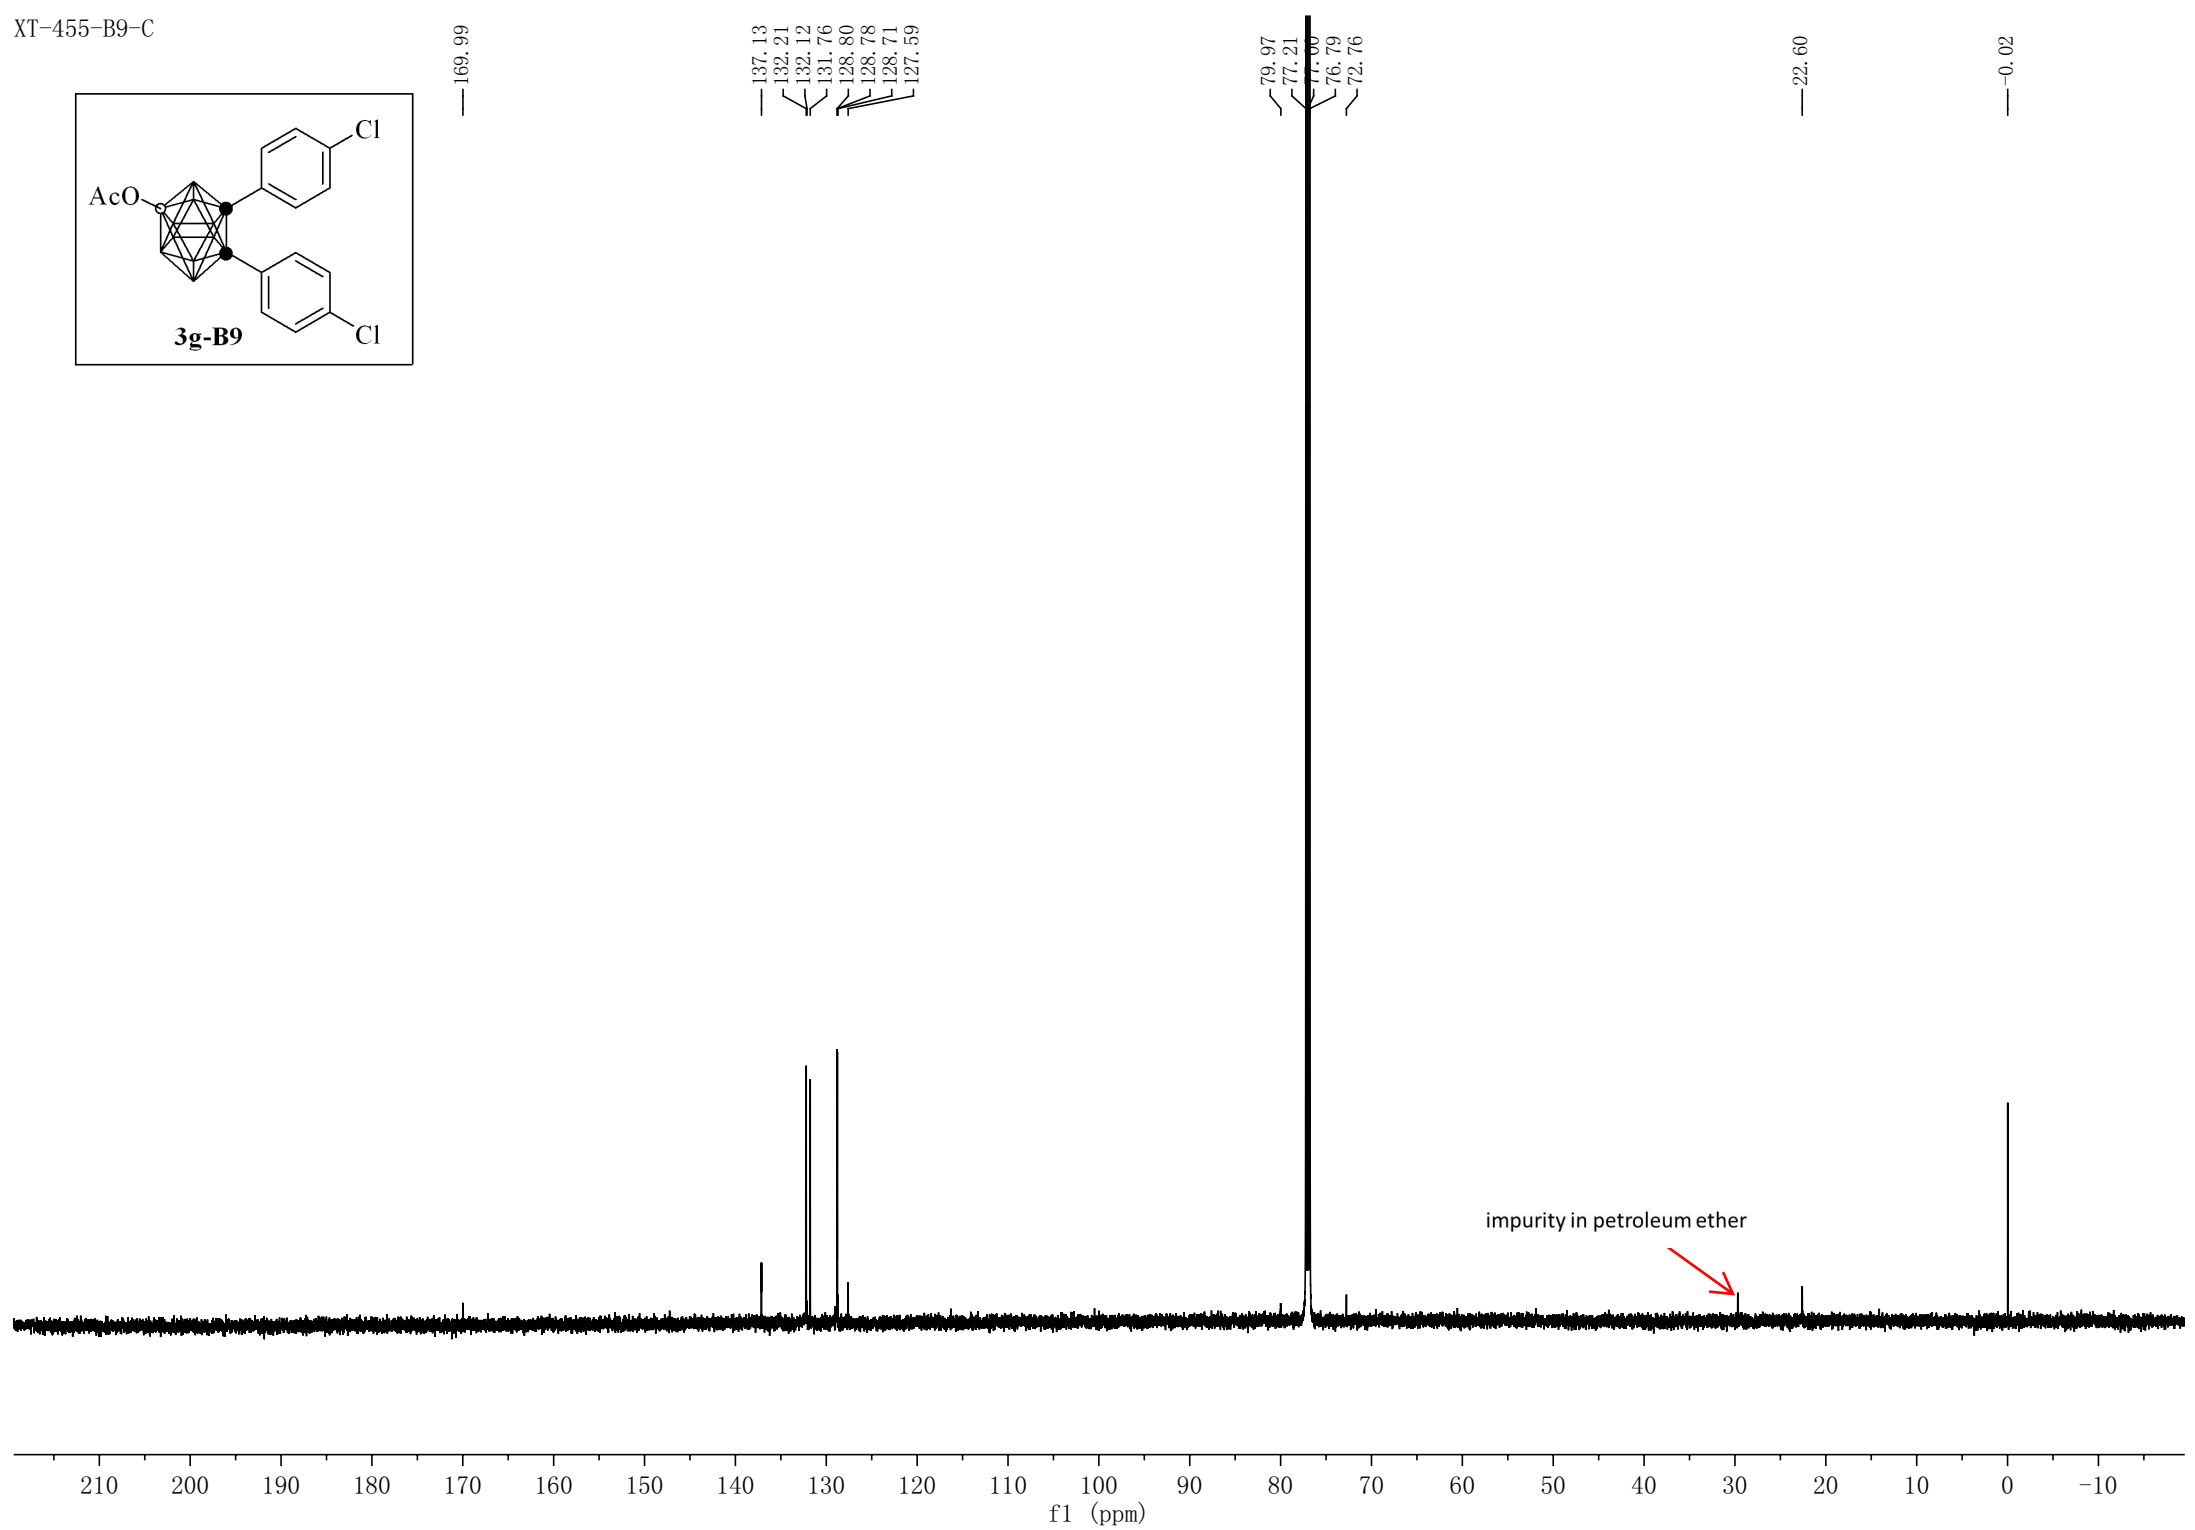

XT-455-B9-B {H}

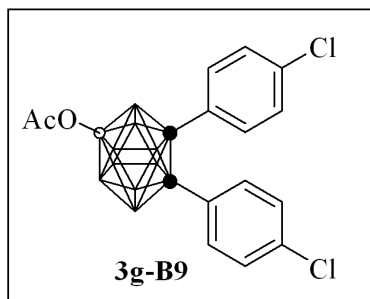

—12.00

—3.05

—9.95

—10.84

—13.59

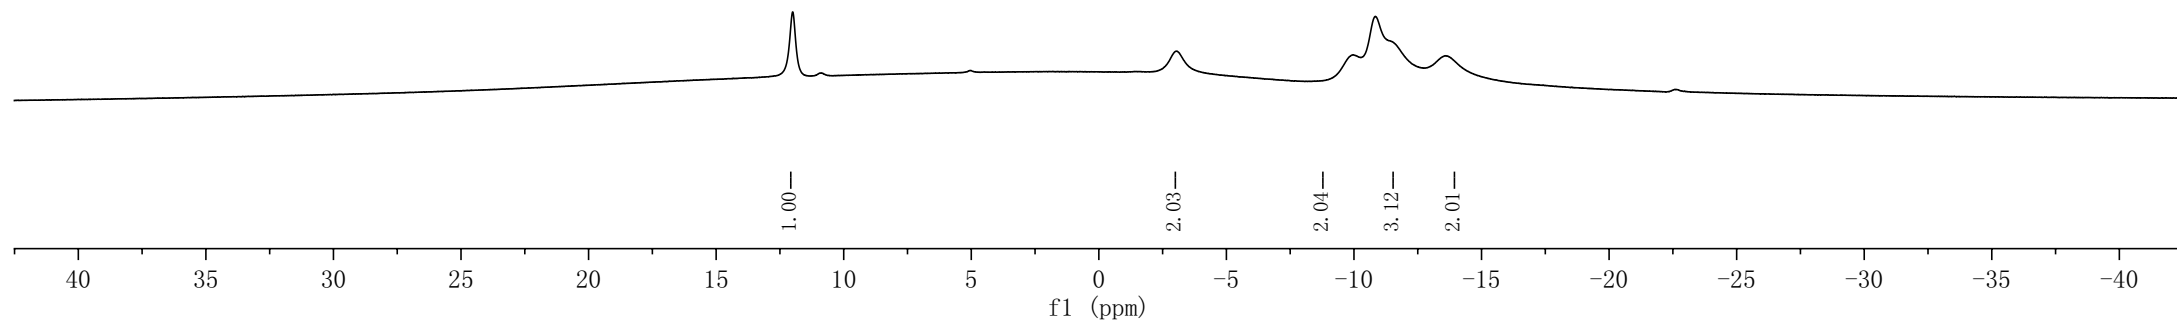

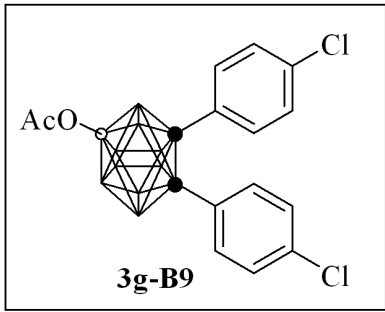

— 12.00

— 2.68  
— 3.40

— 10.44  
— 11.20

— 13.12  
— 14.04

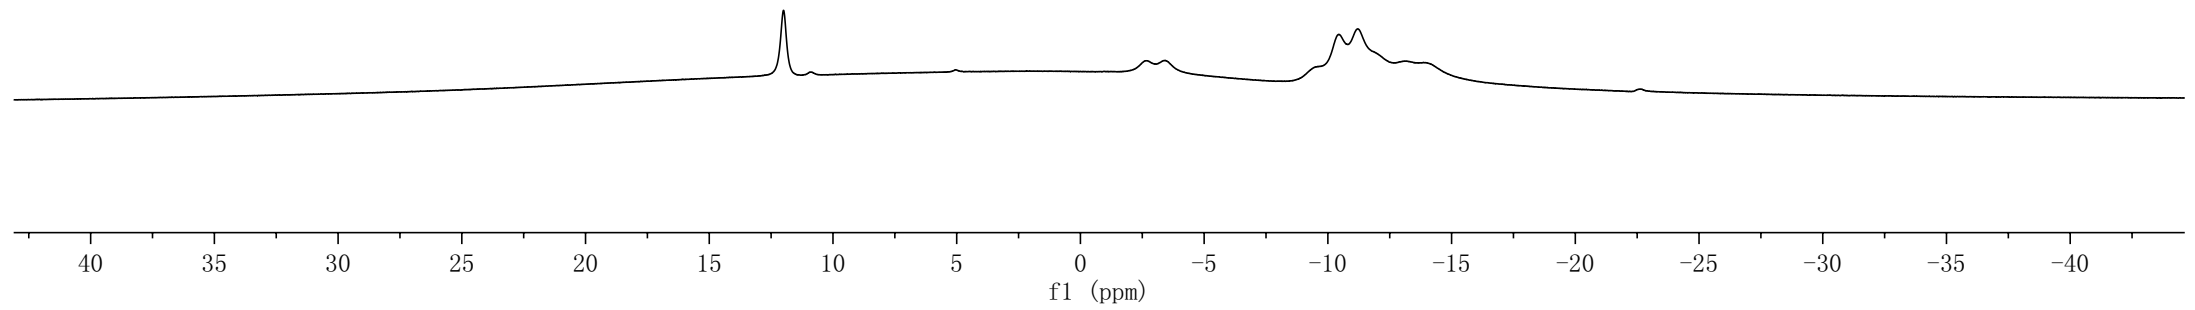

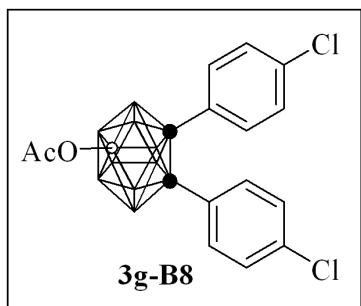

7.40  
7.38  
7.26  
7.16  
7.14

2.15

0.00

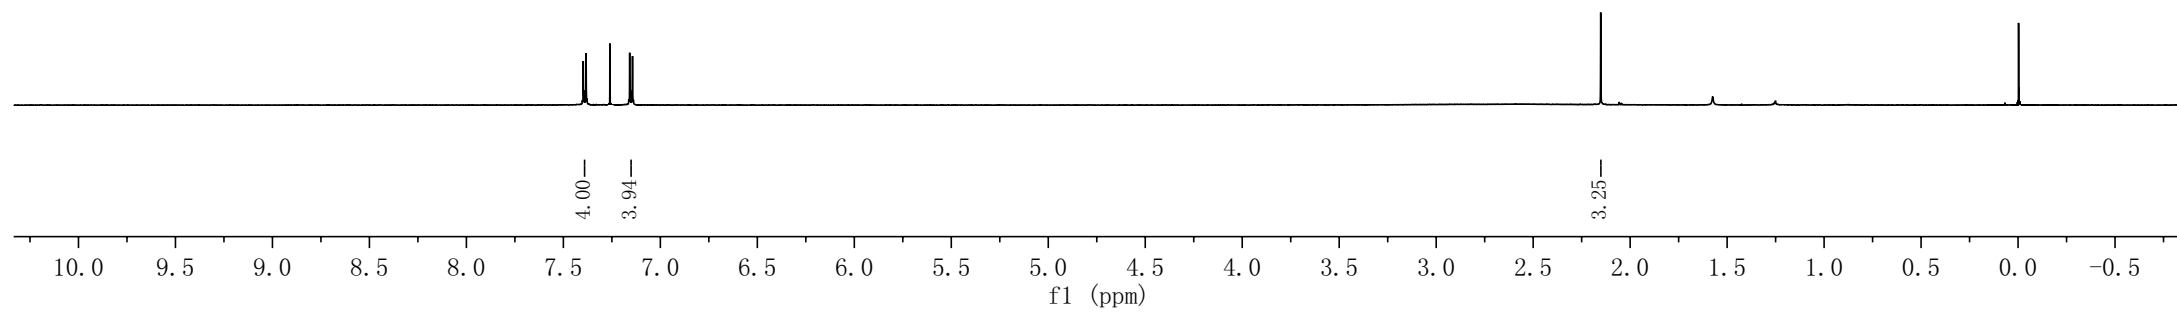

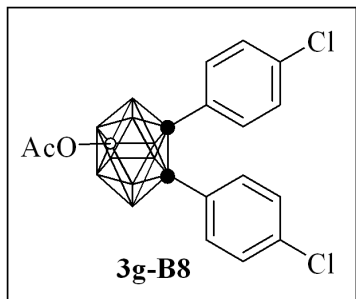

170.60

137.14

132.12

128.77

128.53

79.32

77.21

77.00

76.79

22.67

-0.02

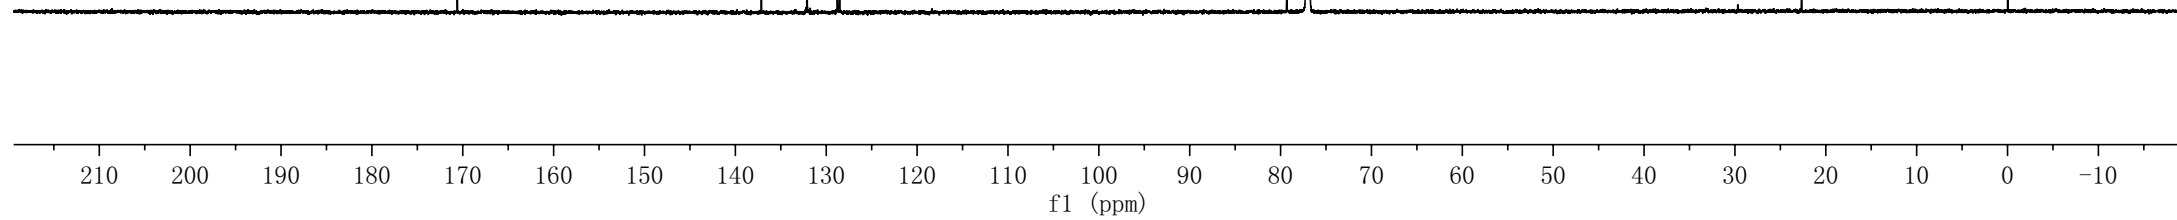

XT-455-B8-B {H}

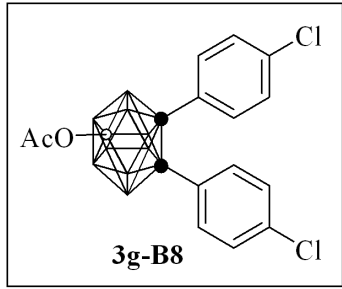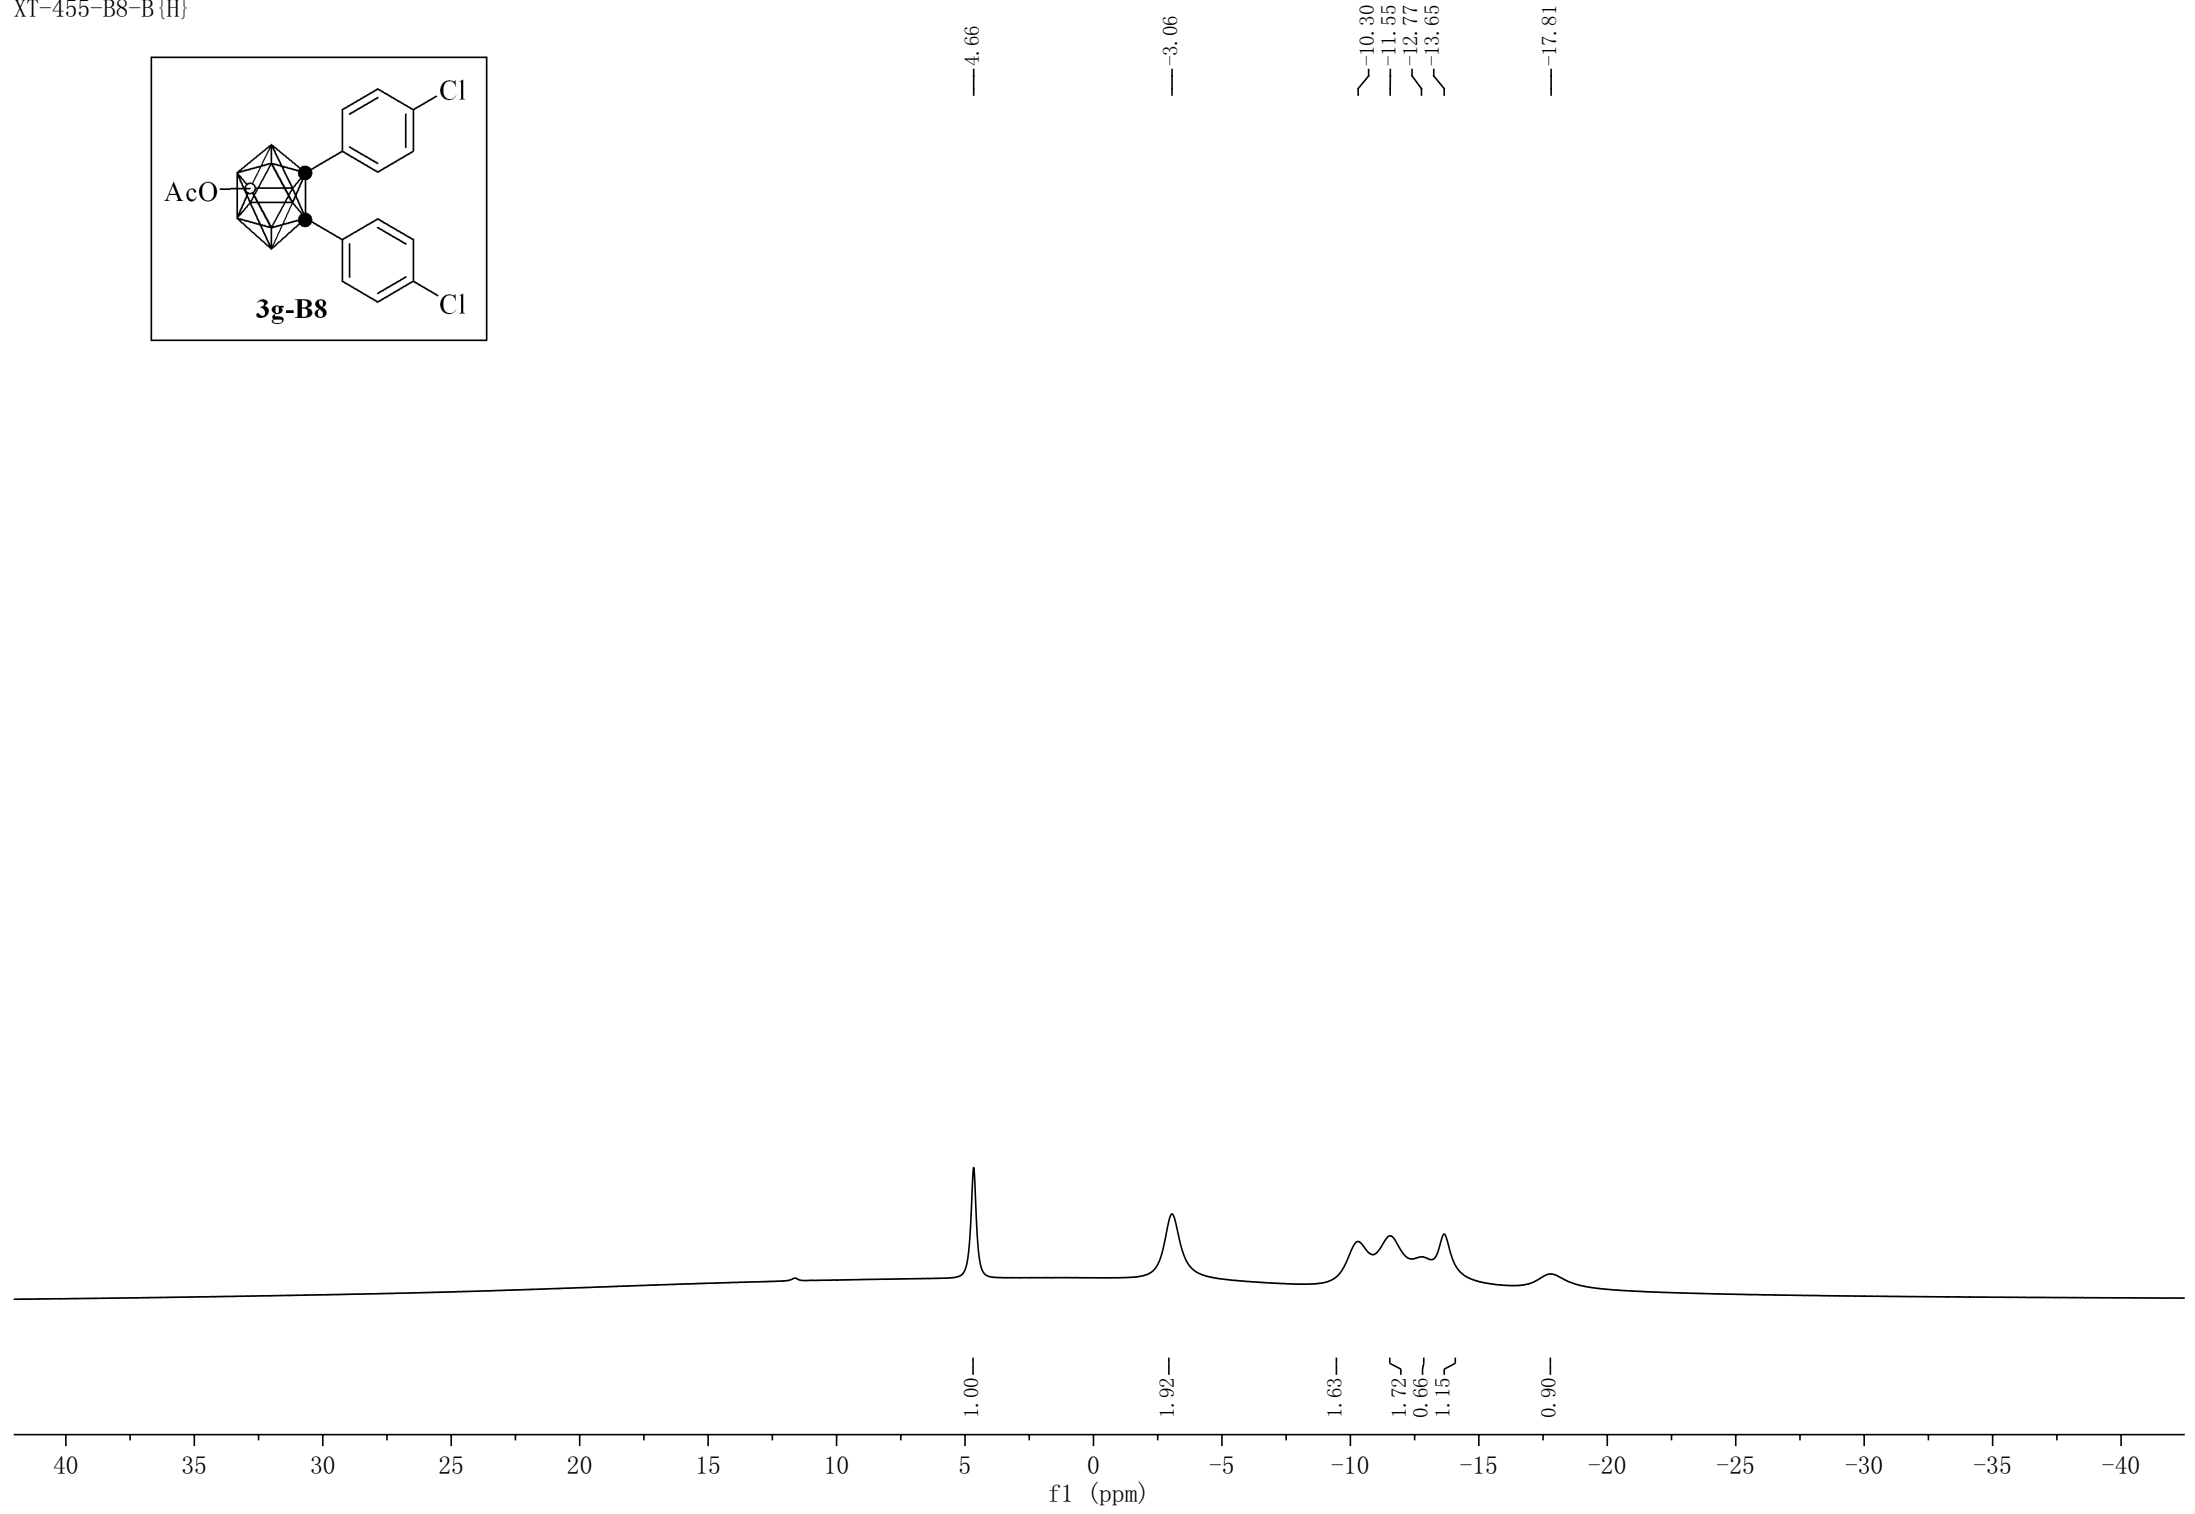

XT-455-B8-B

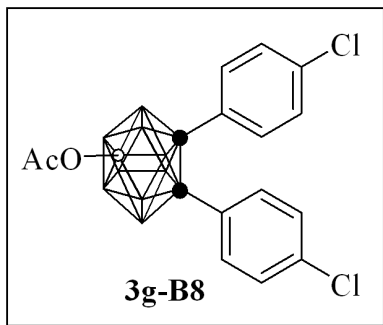

—5.05

—2.30  
—3.04

—10.58  
—11.59  
—12.86  
—13.65

—17.68

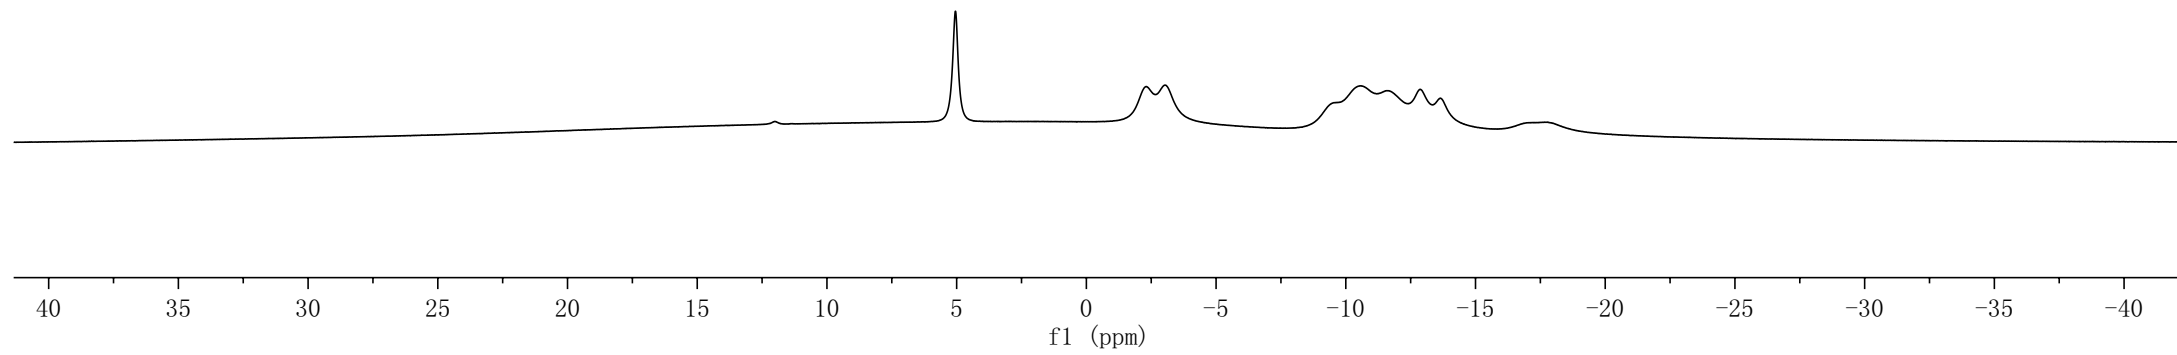

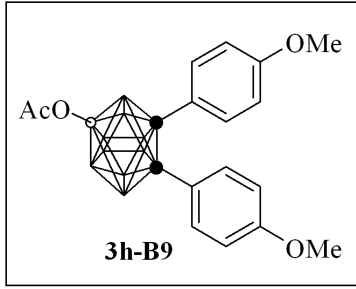

7.37  
7.35  
7.33  
7.31  
7.26

6.65  
6.64  
6.63  
6.63

3.72

2.05

-0.00

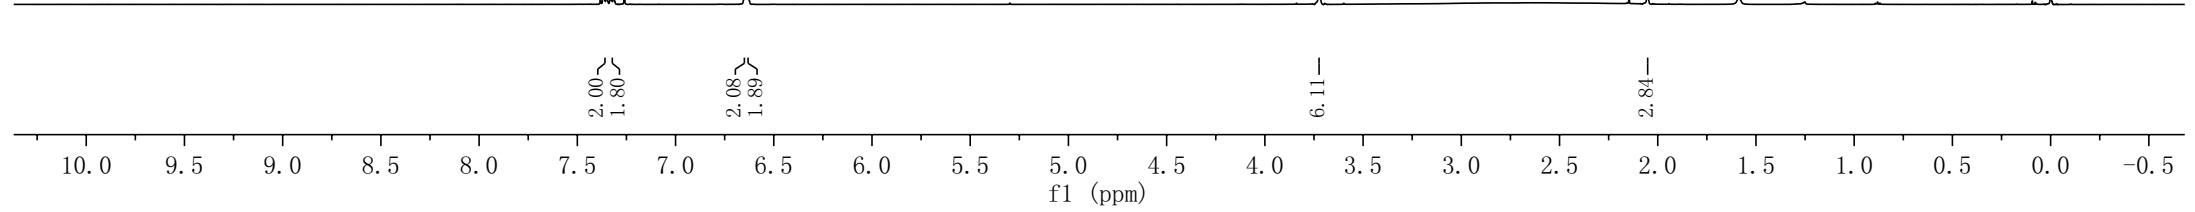



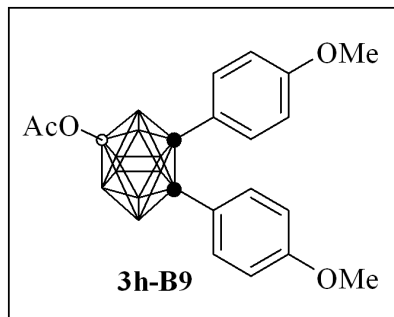

—170.06

160.88  
160.85

132.49  
132.06

122.75  
121.36

113.56  
113.50

81.83  
77.21  
77.00  
76.79  
74.43

—55.26

—22.68

—0.02

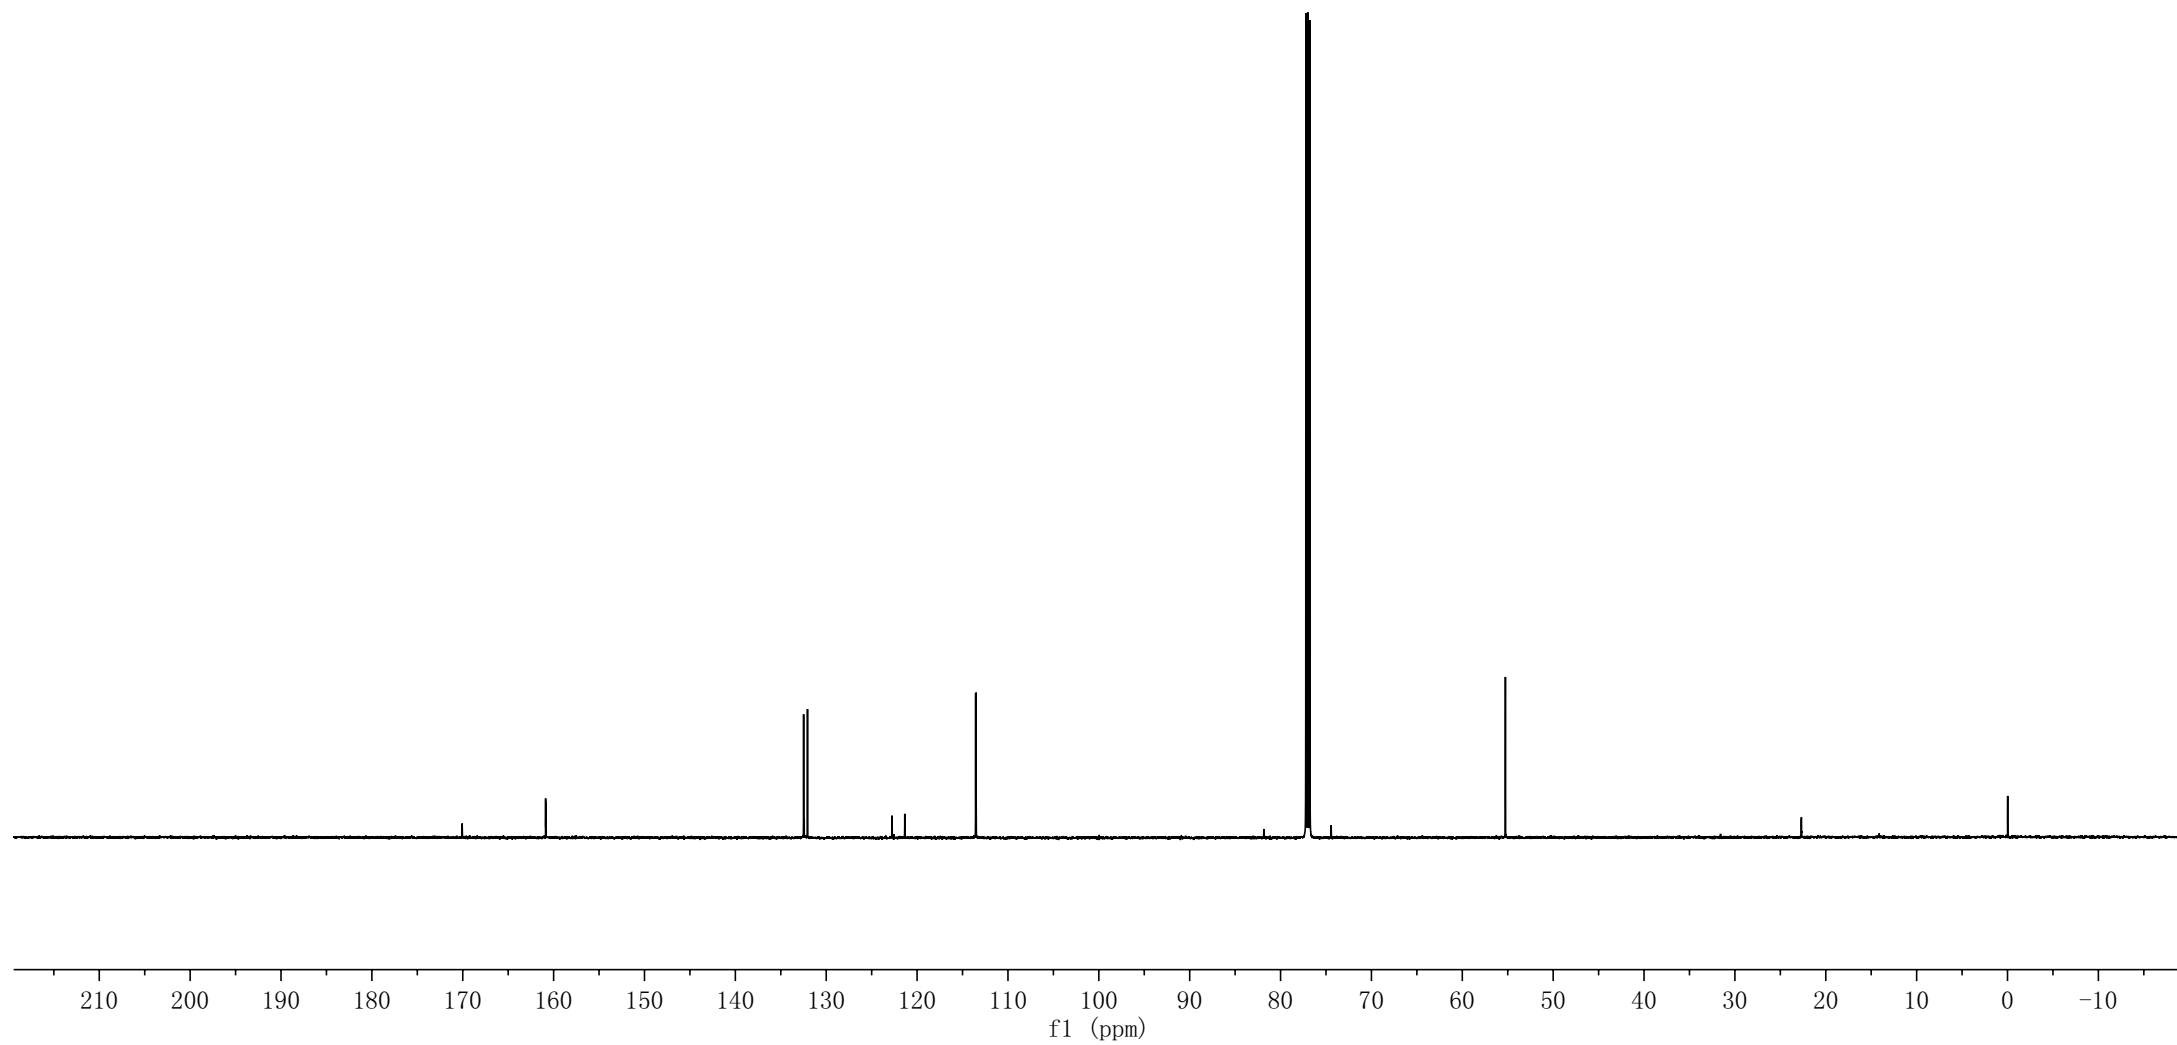

XT-491-B9-B {H}

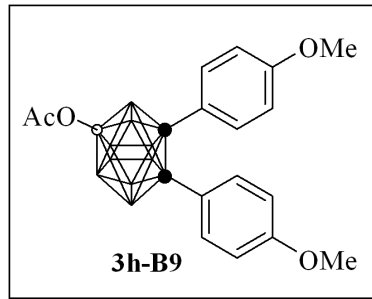

— 11.59

— 3.69

— 9.97

— 11.38

— 13.41

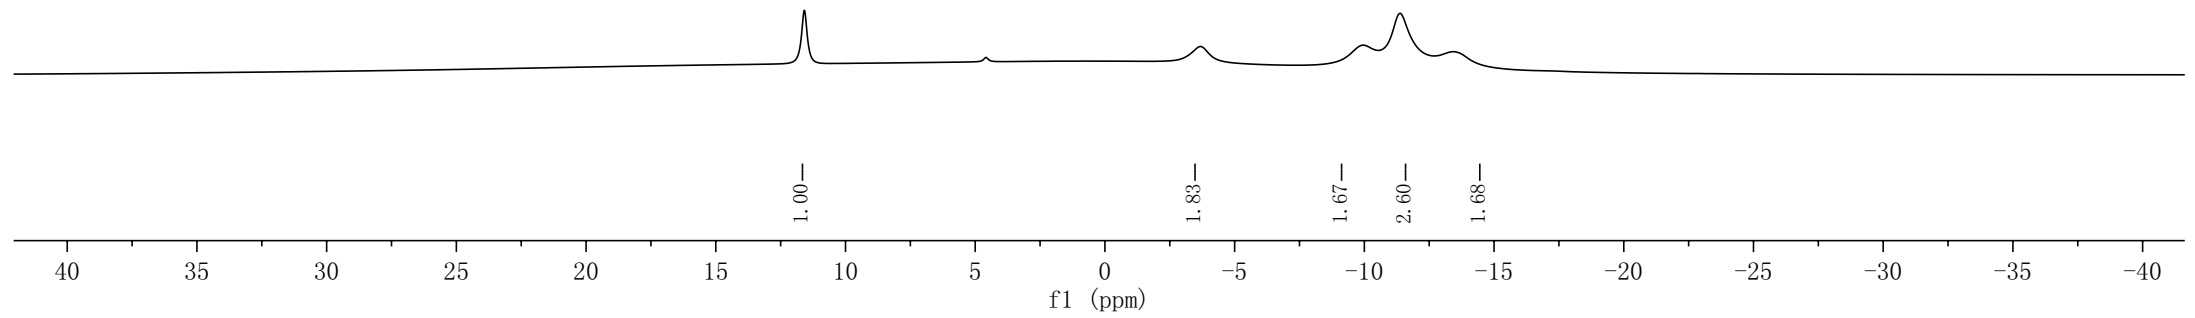

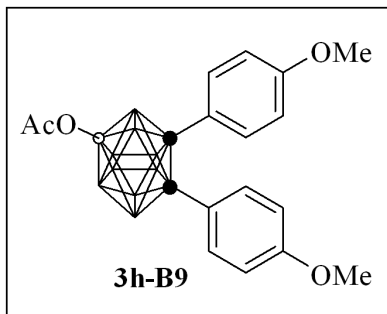

—11.59

—3.34  
—4.01

—9.56  
—11.00  
—11.74

—13.86

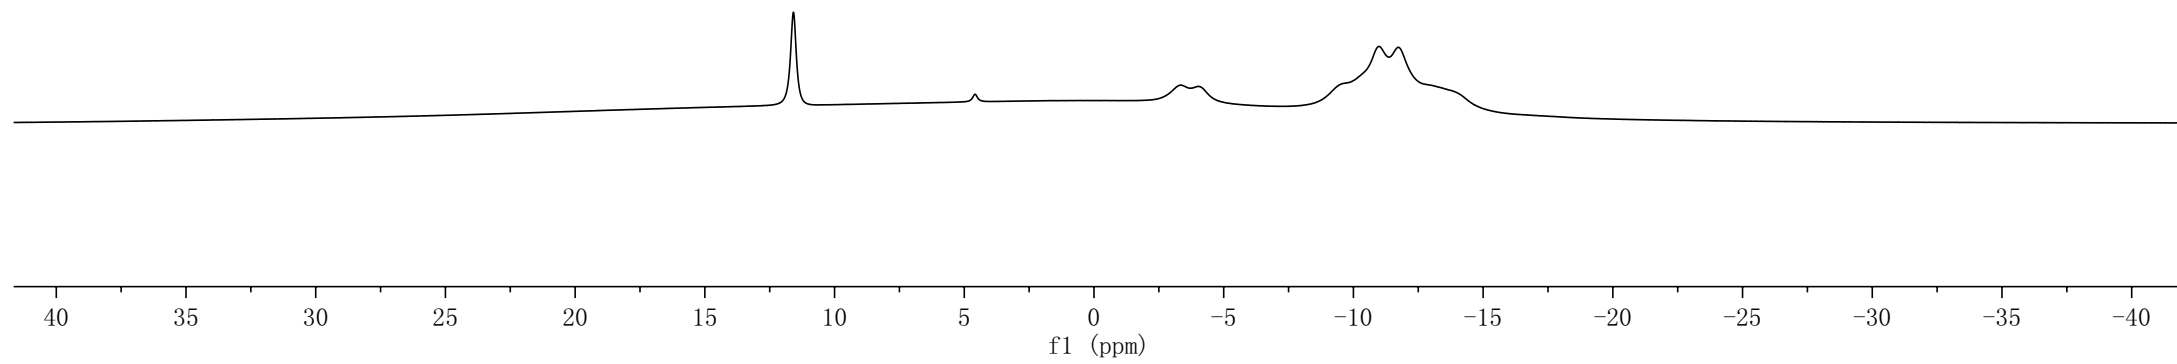

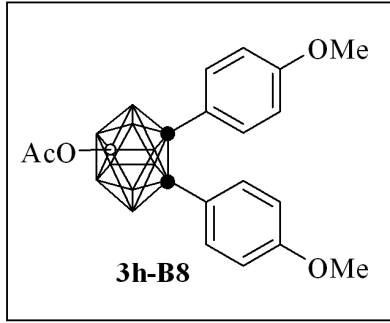

7.38  
7.37  
7.26

6.64  
6.63

3.72

2.15

0.00

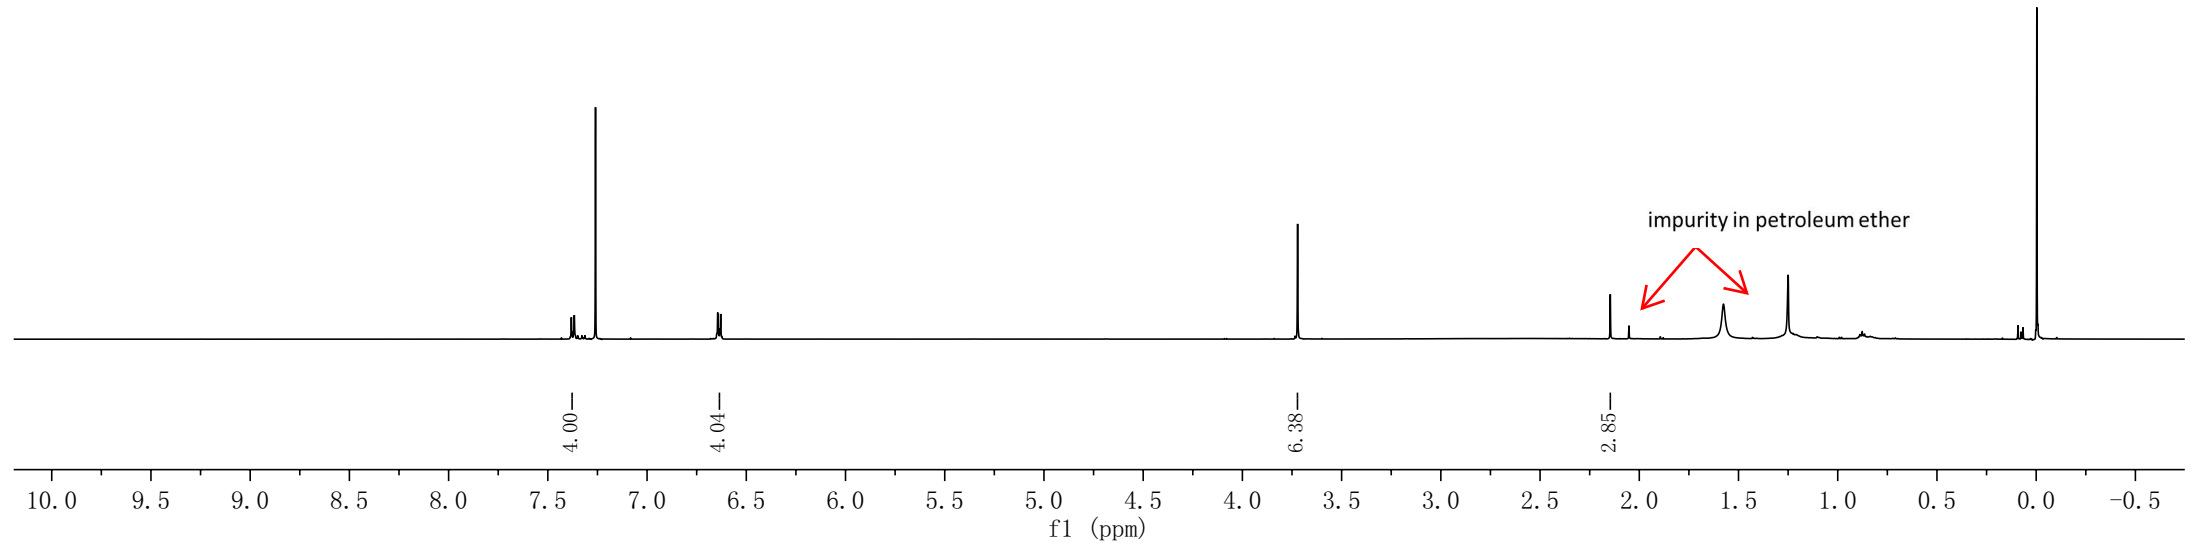

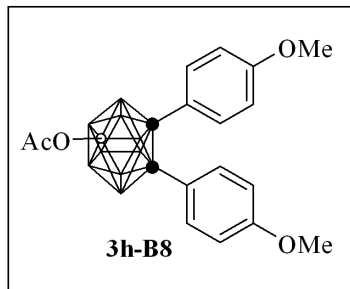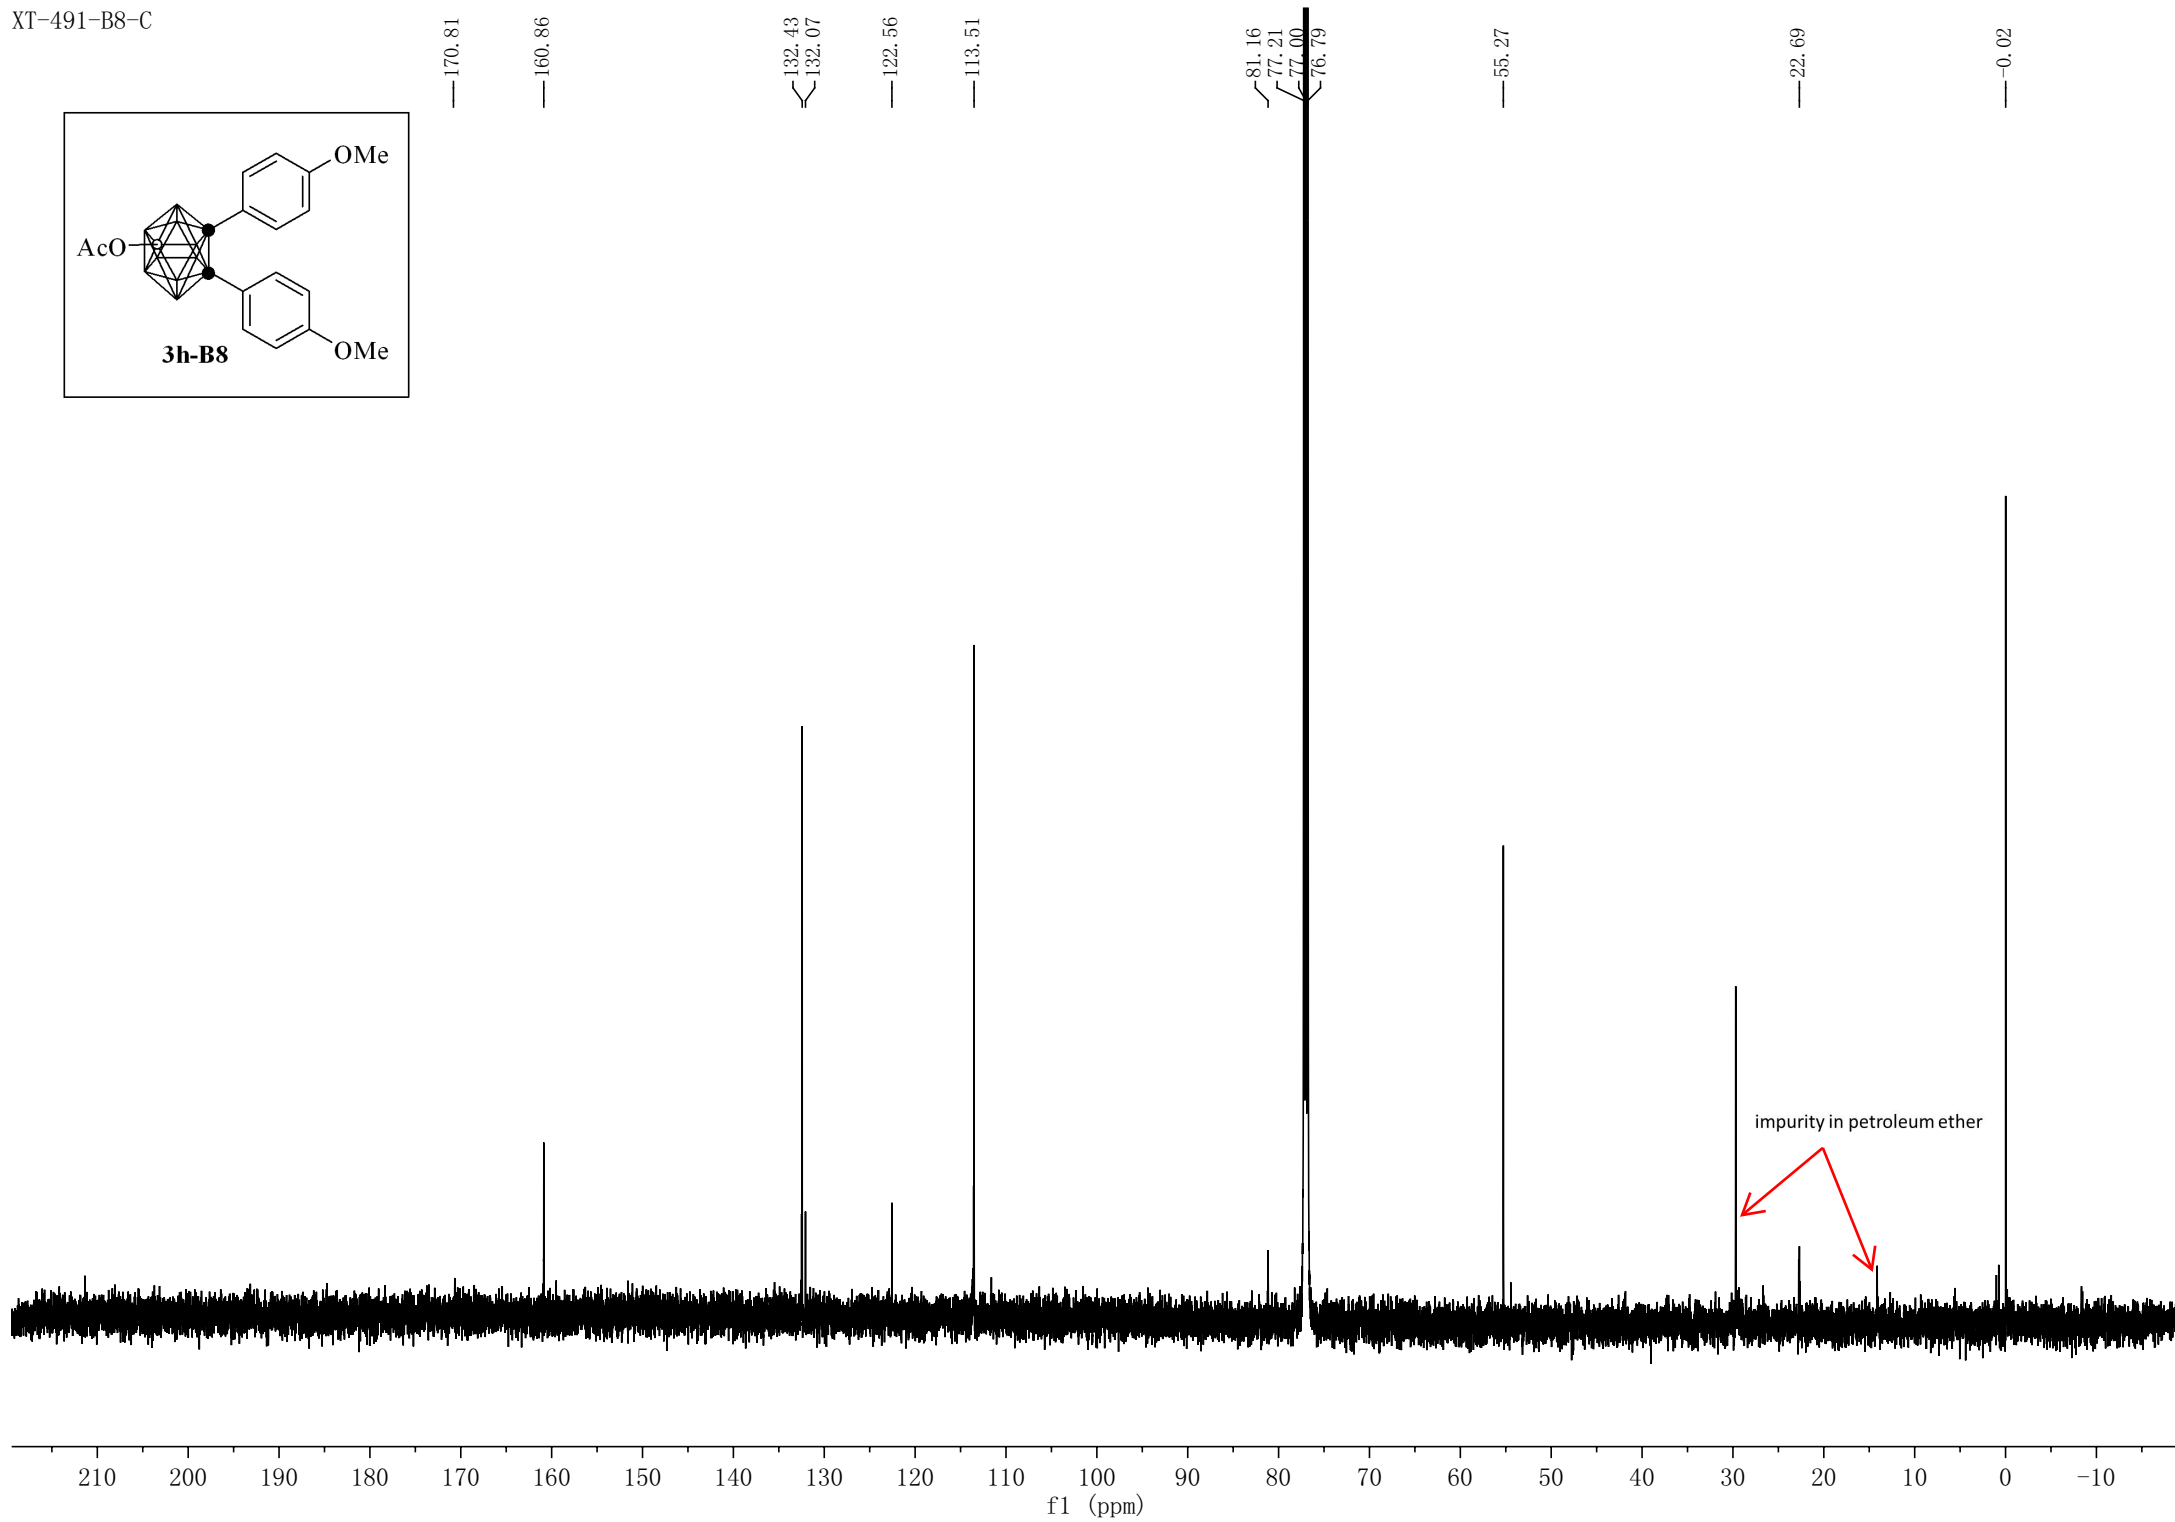

XT-491-B8-B {H}

4.59

3.39

10.09

11.50

13.96

17.63

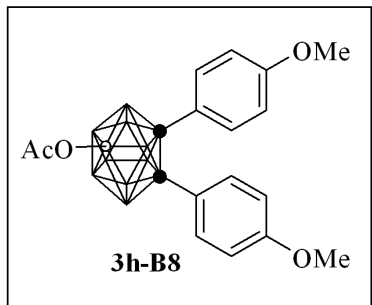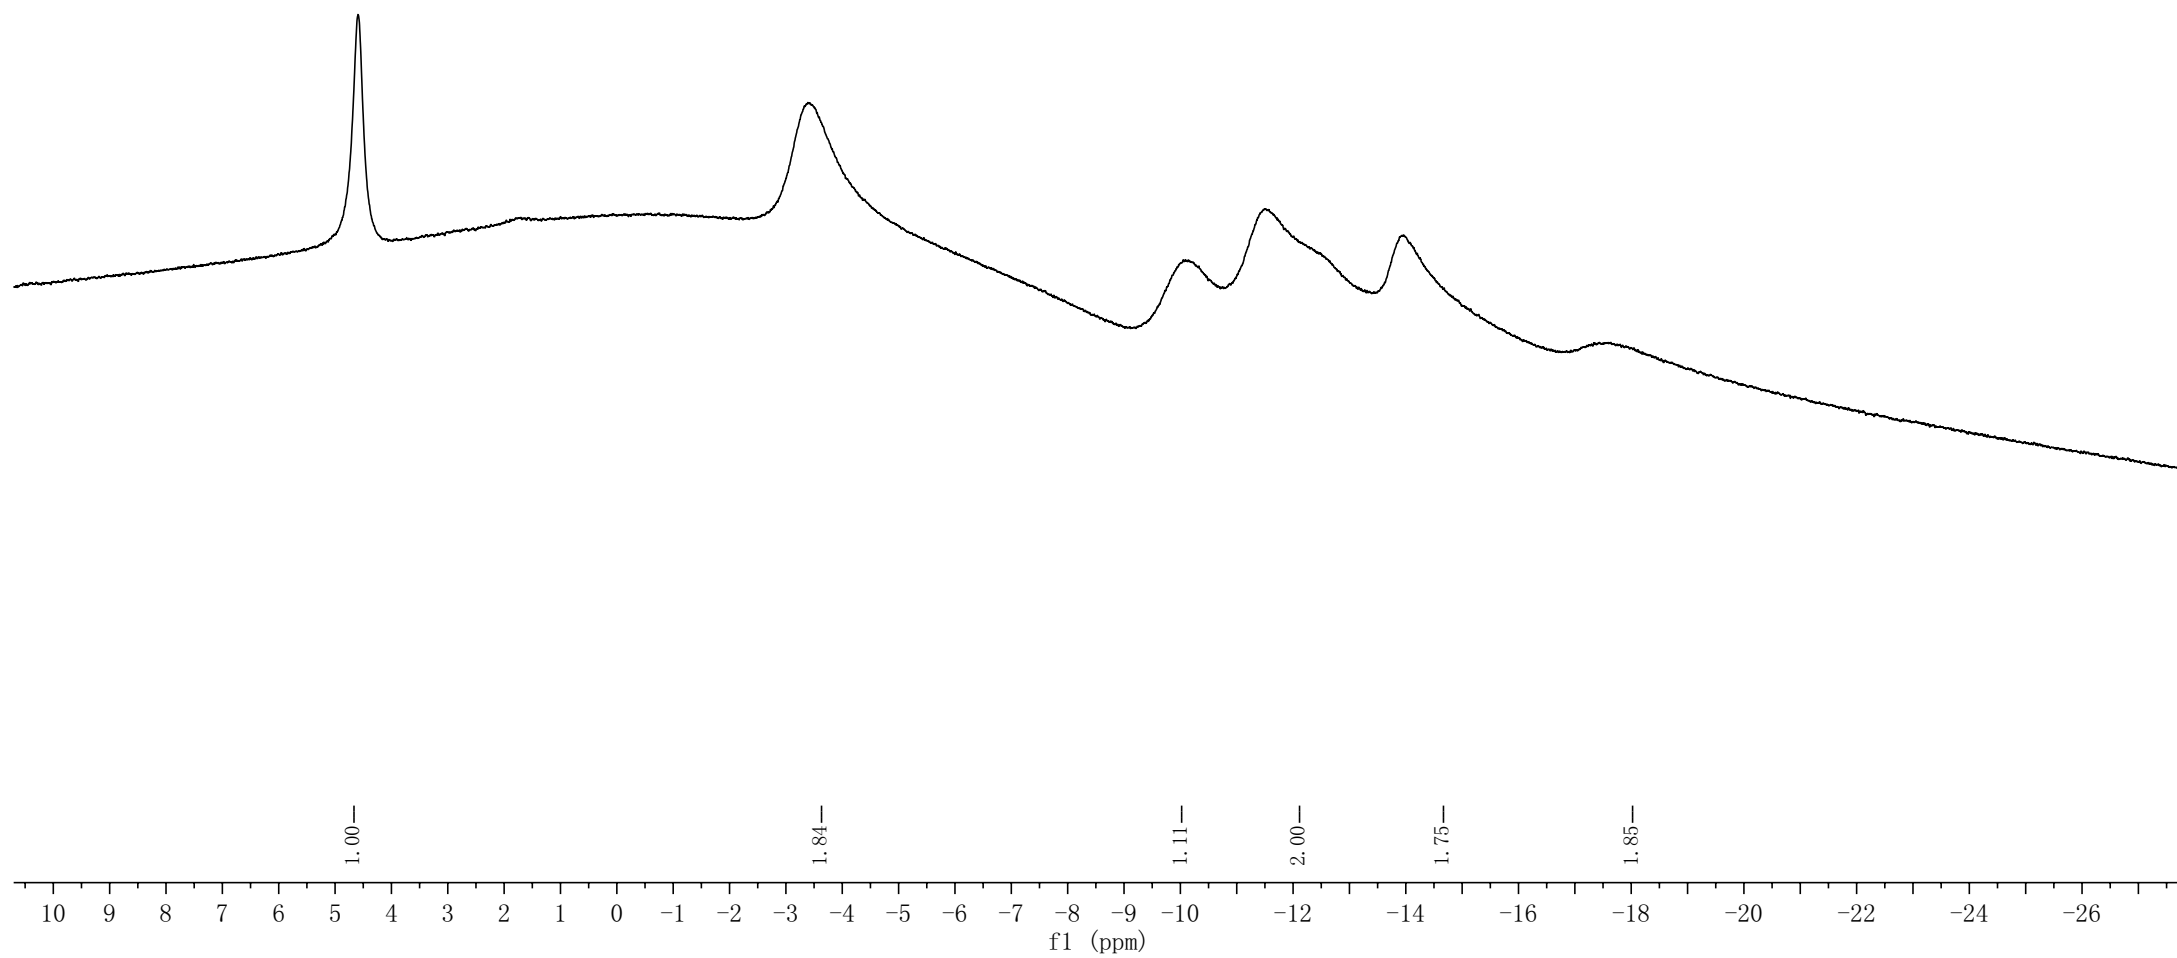

XT-491-B8-B

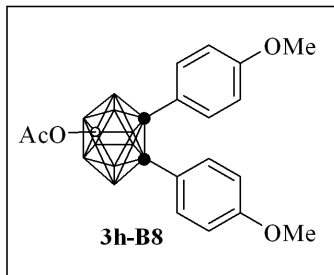

4.59

3.39

10.09

11.50

13.96

17.63

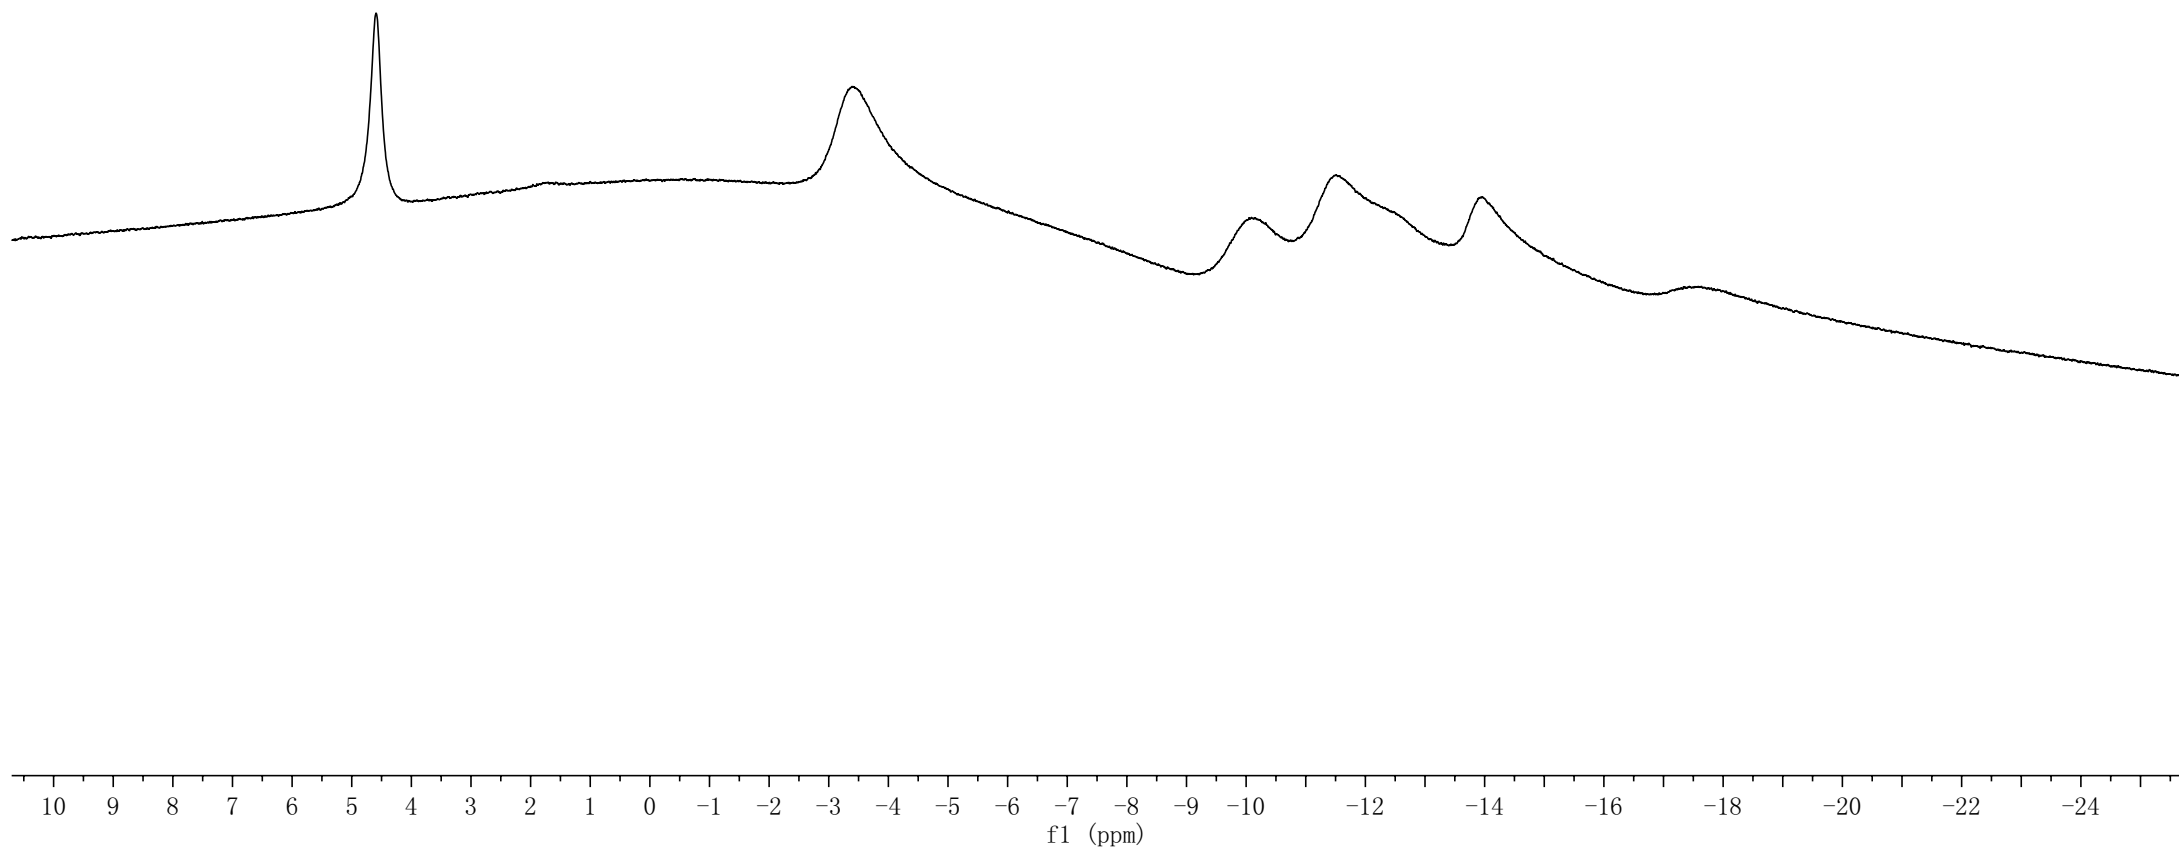

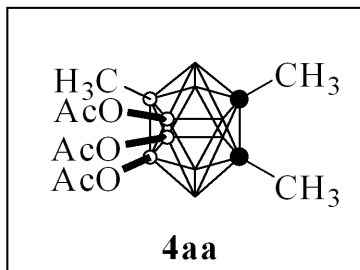

— 7.26

2.07  
2.05

— 0.17  
— -0.01

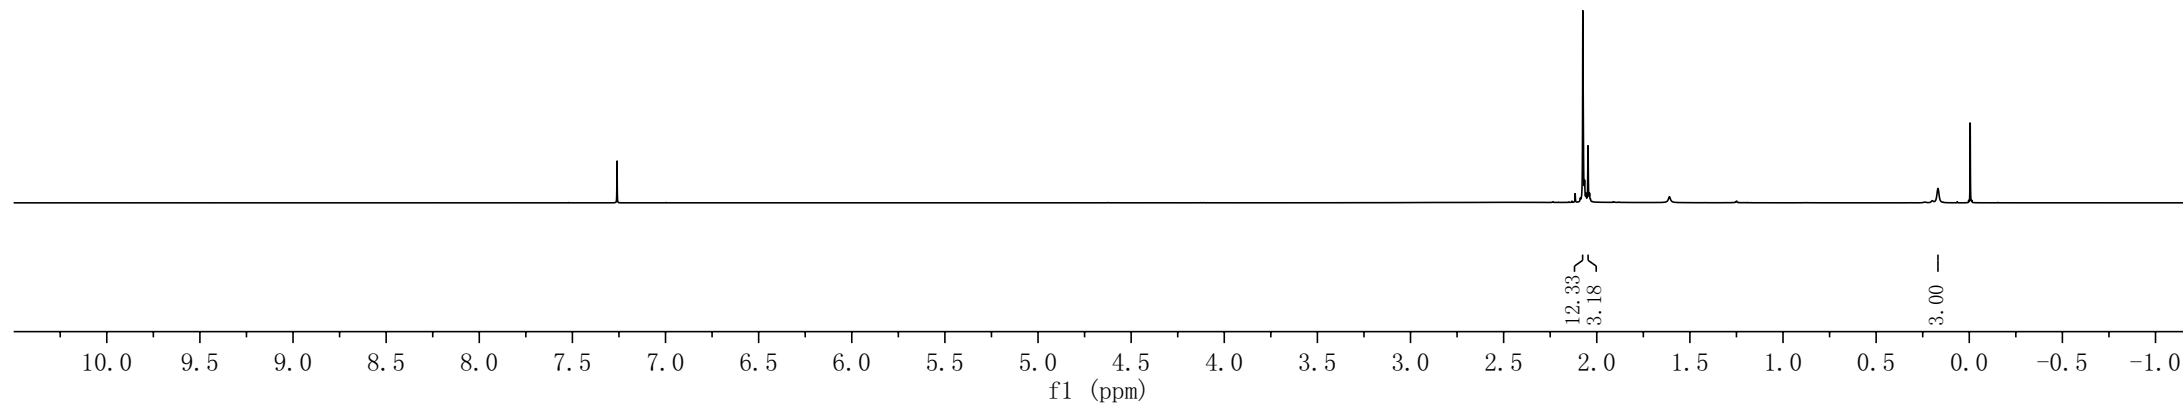



170.24  
169.55

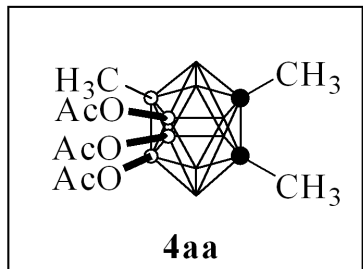

77.32  
77.20  
77.00  
76.68

53.41  
53.30

29.68

22.69  
22.31  
21.21

-0.02

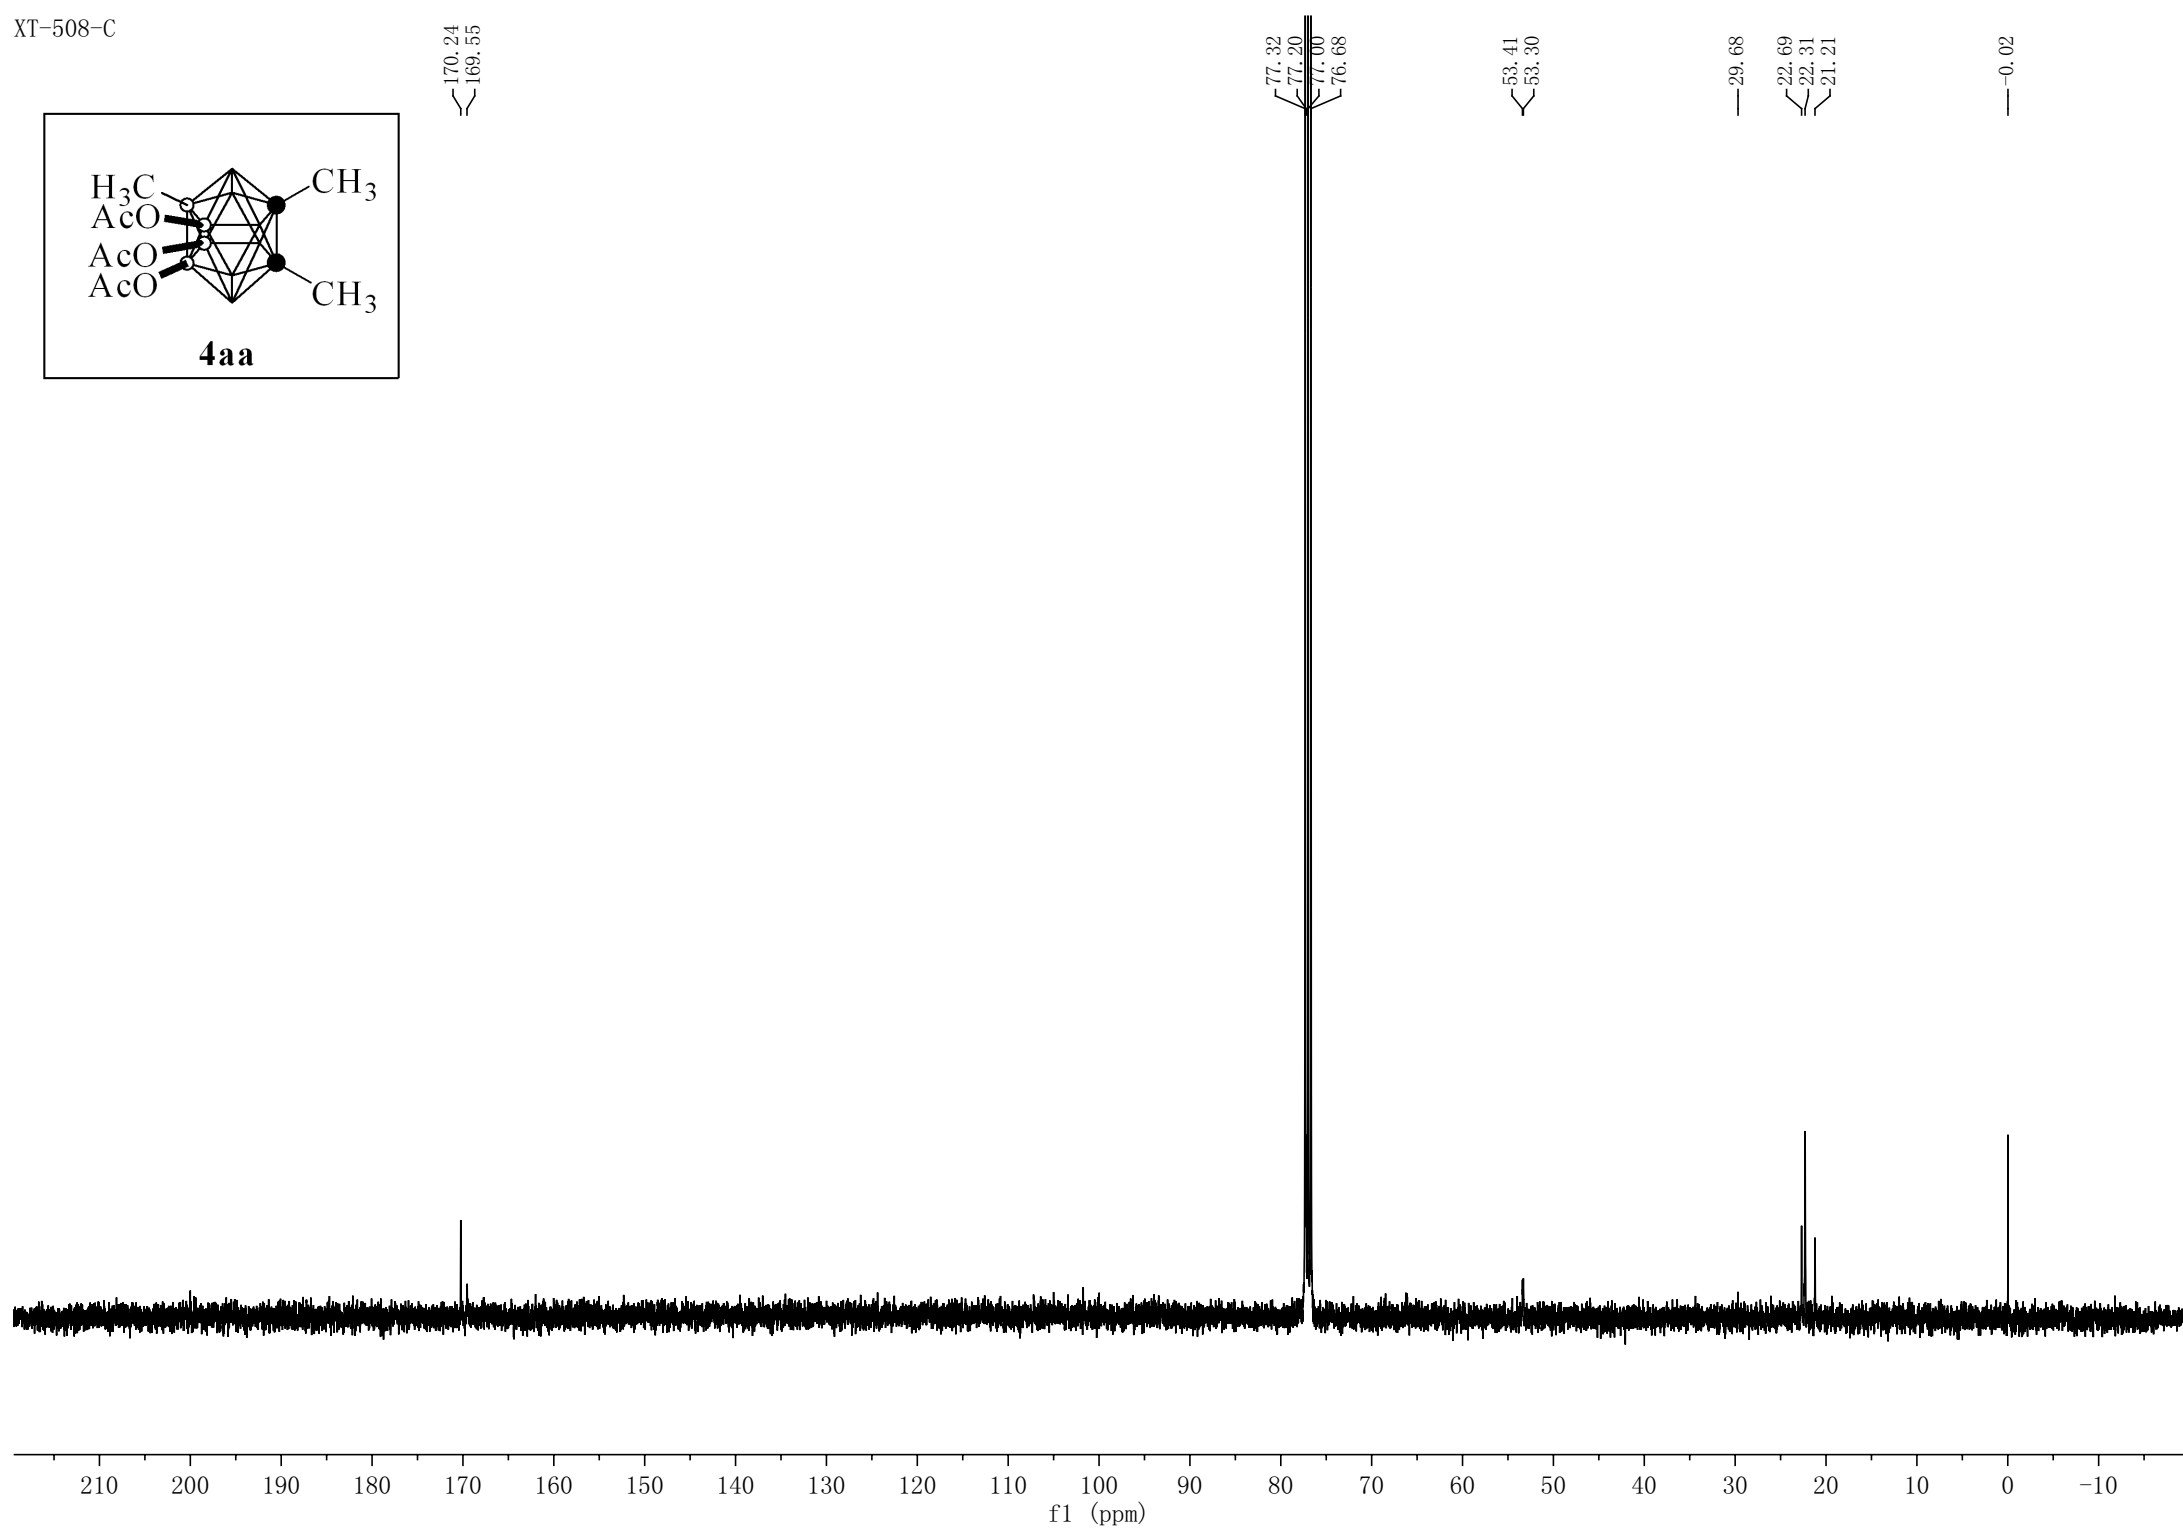

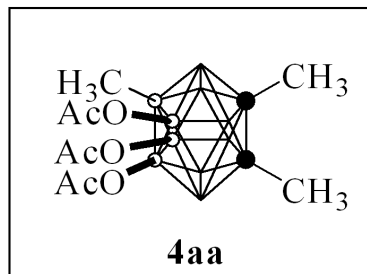

—4.96

—0.14  
—-0.66

—-15.48

—-17.90

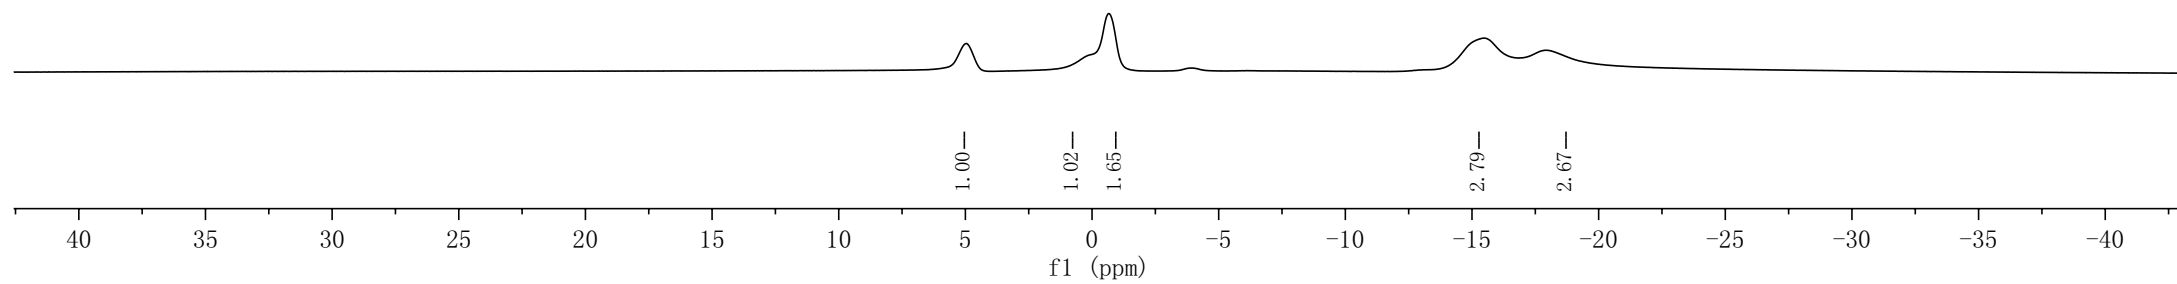

— 7.26

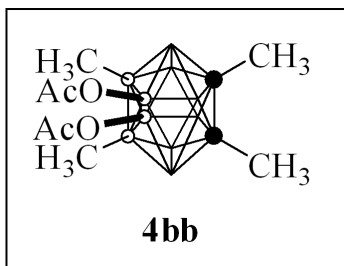

2.08  
2.04

0.07  
-0.00

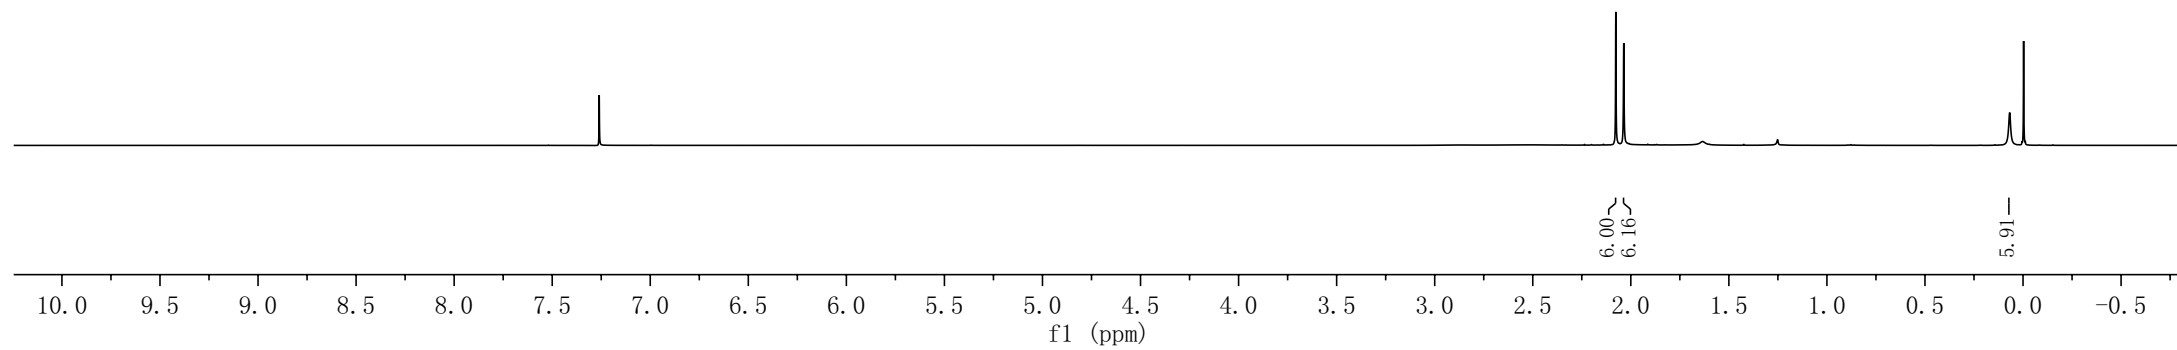

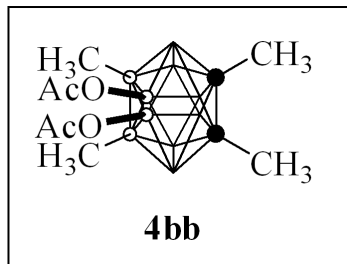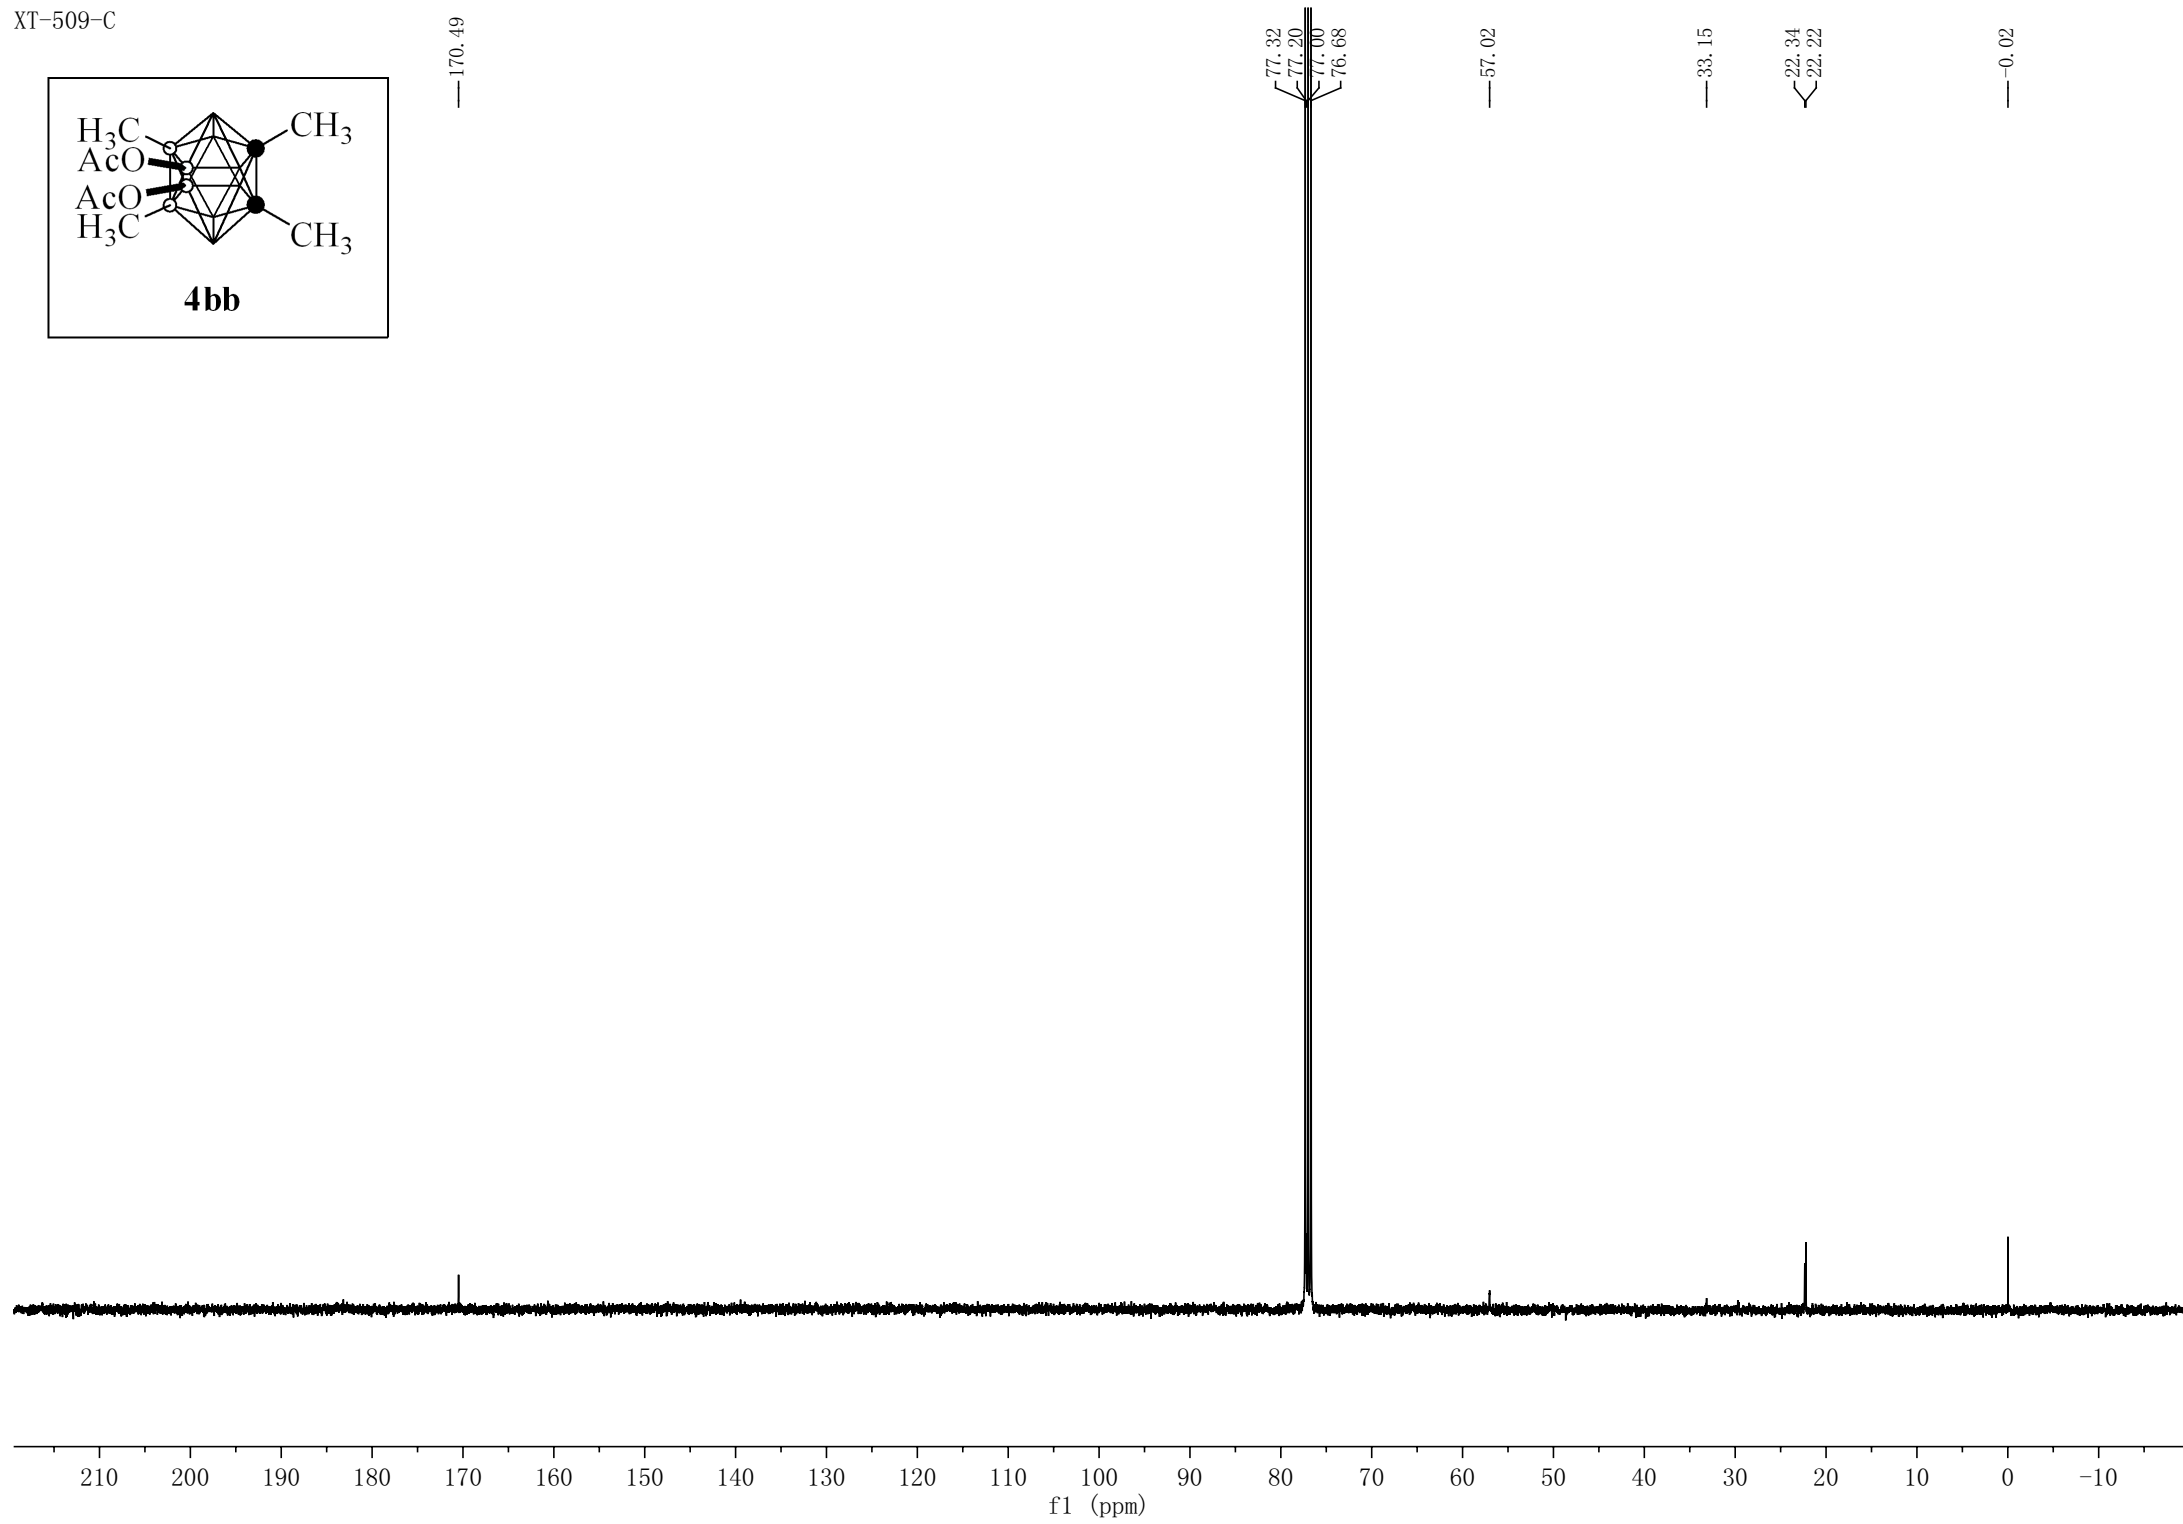

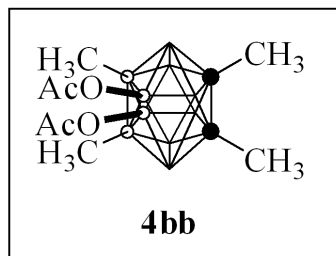

1.68  
1.12

13.41

16.58

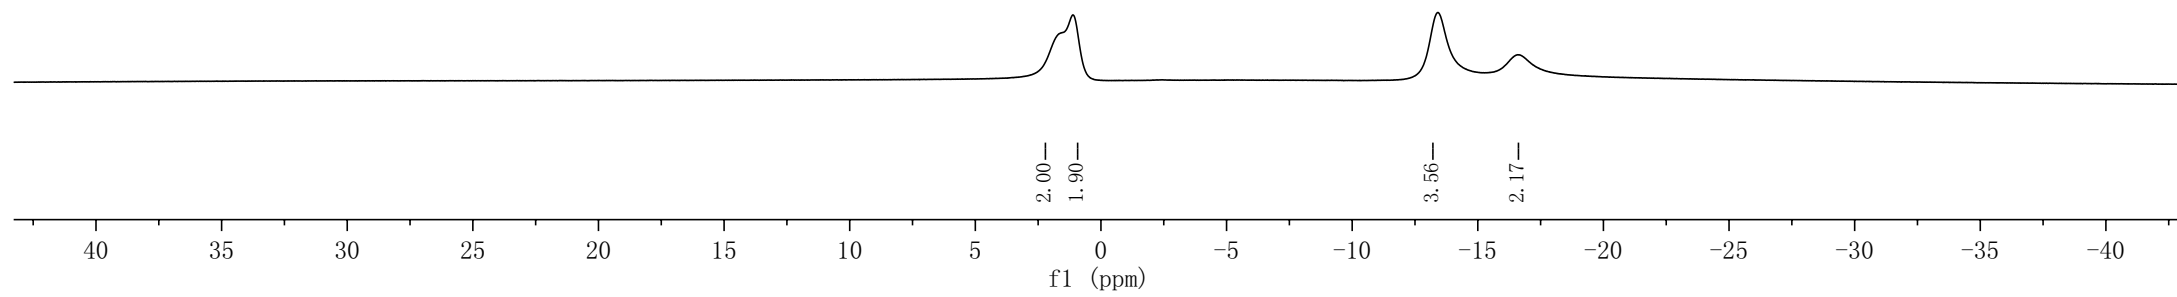

Supplement: c6cc06200h1.pdf [file c6cc06200h1.pdf]
